# Supplementary material for: PACT suppresses PKR activation through dsRNA binding and dimerization, and is a therapeutic target for triple-negative breast cancer
Source: bioRxiv preprint, doi:10.1101/2025.05.27.656288, version 3 (2025-06-09)
Supplement: Supplemental Tables [file 656288_file12.xlsx]

## Sheet: Description of Supp. Tables
Description of Supplemental Tables
Supplemental Table 1	Sequences of sgRNAs, oligonucleotides and primers
Supplemental Table 2	Proximity Labeling Results
Supplemental Table 3	DESeq2 results - PACT knockout in HCC1806
Supplemental Table 4	DESeq2 results - PACT knockout in MDA-MB-468
Supplemental Table 5	Gene set enrichment analysis results - Gene Ontology - HCC1806
Supplemental Table 6	Gene set enrichment analysis results - Gene Ontology - MDA-MB-468
Supplemental Table 7	Gene set enrichment analysis results - Hallmark and ATF4 - HCC1806
Supplemental Table 8	Gene set enrichment analysis results - Hallmark and ATF4 - MDA-MB-468

## Sheet: Supplemental Table 1
sgRNA Sequences
Name	sgRNA sequence (5'-3')
sgNTA	GTATTACTGATATTGGTGGG
sgC1	GAGCCACATTAACCGGCCCT
sgPACT-1	GTTGGTGACATAACCTGCAC
sgPACT-2	GGCGAAACATAGAGCTGCAG
sgPKR	GCAAGACTATGGAAAGGAAG
qPCR Primers
Name	Sequence (5'-3')
BIRC3 qF1	TGATGAAAAGCGCCAACACG
BIRC3 qR1	GAAACCAGCACGAGCAAGAC
IRF1 qF	AGCAAGGCCAAGAGGAAGTC
IRF1 qR	ACTGTGTAGCTGCTGTGGTC
EEF1A1 qF	TGTCGTCATTGGACACGTAGA
EEF1A1 qR	ACGCTCGAGAGTGAGAGGCT
ASNS qF	GAGGAGGAGAGTGAGAGGCT
ASNS qR	ACCATGGGCAGCAGTAGTTC
IFIH1 qF	AGTGATTCAGGCAACATGGG
IFIH1 qR	GCTGGGCAACTTCCATTTGG
ATF3 qF1	AGGAAGAGCTGAGGTTTGCC
ATF3 qR1	TGACTGATTCCAGCGCAGAG
PARP14 qF	GATGTTGCTGTTGTTACCTTTCA
PARP14 qR	CCAGGTGGCAGGTTTTCAA
NFKBIE qF	AGGAACATCTCACTCTCTGGAC
NFKBIE qR	GCCCTCCTGCACATCAATG
IFIT2 qF	CTGGGGAAACTATGCCTGGG
IFIT2 qR	GTGTCCACCCTTCCTCACAG
SESN qF	ATCCAGGCCTTGCTGAAGAC
SESN qR	GCCAAACACGAAGGAGGAGA
HSPA5 qF	GAAAGAAGGTTACCCATGCAGT
HSPA5 qR	CAGGCCATAAGCAATAGCAGC
Cloning Primers and oligonucleotides for Overexpression
Name	Sequence (5'-3')
PACTd3_stop_oligo 1	AATTCGTAATGAACTAGTACGCGTC
PACTd3_stop_oligo 1	AATTGACGCGTACTAGTTCATTACG
GST_F_EcoRI	NNNNNGAATTCACATATGTCCCCTATACTAGGTTATTGG
GST_R_EcoRI	NNNNNGAATTCTTATCATTTTGGAGGATGGTCGCCAC
GST_F_BamHI	NNNNNGGATCCACCATGTCCCCTATACTAGGTTATTGG
Oligonucleotides for lentiGuide-sgRNA-puro and lenti-sgRNA-hygro
Name	Sequence (5'-3')
sgPACT-1 oligo 1	caccgGTTGGTGACATAACCTGCAC
sgPACT-1 oligo 2	aaacGTGCAGGTTATGTCACCAACc
sgPACT-2 oligo 1	caccgGGCGAAACATAGAGCTGCAG
sgPACT-2 oligo 2	aaacCTGCAGCTCTATGTTTCGCCc
sgC1 oligo 1	caccgGAGCCACATTAACCGGCCCT
sgC1 oligo 2	aaacAGGGCCGGTTAATGTGGCTCc
sgPKR oligo 1	caccgGCAAGACTATGGAAAGGAAG
sgPKR oligo 2	aaacCTTCCTTTCCATAGTCTTGCc
Oligonucleotides for tet-pLKO-sgRNA-puro
Name	Sequence (5'-3')
sgPACT-1 oligo 1	cGTTGGTGACATAACCTGCACgttta
sgPACT-1 oligo 2	GTGCAGGTTATGTCACCAACggtgtc
sgPACT-2 oligo 1	cGGCGAAACATAGAGCTGCAGgttta
sgPACT-2 oligo 2	CTGCAGCTCTATGTTTCGCCggtgtc
sgC1 oligo 1	cGAGCCACATTAACCGGCCCTgttta
sgC1 oligo 2	AGGGCCGGTTAATGTGGCTCggtgtc
sgNTA oligo 1	cGTATTACTGATATTGGTGGGgttta
sgNTA oligo 2	CCCACCAATATCAGTAATACggtgtc

## Sheet: Supplemental Table 2
	Non-Inducible sgRNAs				Inducible sgRNAs (rescue and double-knockout experiments
Cell line	HCC1806	MDMBA-468	MDMBA-453	BT549	HCC1806
Day -1	Plate 1*10^6 cells for transduction	Plate 2*10^6 cells for transduction	Plate 2*10^6 cells for transduction	Plate 1*10^6 cells for transduction
Day 0	Transduce sgRNA	Transduce sgRNA	Transduce sgRNA	Transduce sgRNA	Plate cells and induce with doxycyclin (2 μg/mL final)
Day 1	Select with puromycin (2 μg/mL final)	Select with puromycin (2μg/mL final)	Select with puromycin (2μg/mL final)	Select with puromycin (2μg/mL final)
Day 2	Induce with doxycyclin (2 μg/mL final), split into 15 cm dish	Induce with doxycyclin (2 μg/mL final)	Induce with doxycyclin (2 μg/mL final)	Induce with doxycyclin (2 μg/mL final)
Day 3	Split and plate for foci formation (2*10^3 cells/well), cell titer-glo (5*10^3 cells/well), and maintenance			Split and plate for cell titer-glo (5*10^3 cells/well), and maintenance	split for harvesting and maintence
Day 4		Split and plate for foci formation (2*10^3 cells/well) and maintenance	Change media (with doxycyclin)
Day 5	Split and plate for harvesting			Split and plate for harvesting and maintenance	Harvest for protein and RNA, split and plate cell titer-glo (5*10^3 cells/well)
Day 6	Perform CTG	Change media (with doxycyclin)	Change media (with doxycyclin)	Perform CTG
Day 7	Harvest for protein and RNA	Split and plate for harvesting and cell titer-glo (5*10^3 cells/well)	Split and plate for harvesting, cell titer-glo (5*10^3 cells/well), and transduction (2*10^6 cells)	Harvest for protein and RNA and plate 1*10^6 cells for transduction
Day 8			Transduce shRNA	Transduce shRNA	Perform CTG
Day 9	Change foci formation media	Change foci formation media	Select (shRNA) with hygromycin (1mg/mL final)	Select with hygromycin (1mg/mL final)
Day 10		Harvest for protein and RNA	Harvest (sgRNA), Split and plate (shRNA) for harvesting and cell titer-glo (5*10^3cells/well)	Split and plate (shRNA) for harvesting and cell titer-glo (5*10^3 cells/well)
Day 11		Perform CTG	Perform CTG (sgRNA)
Day 12			Harvest (shRNA)	Harvest (shRNA)
Day 13				Perform CTG (shRNA)
Day 14		Change foci formation media	Perform CTG (shRNA)
Day 15	Change foci formation media
Day 16
Day 17
Day 18	Stain foci formation
Day 19		Change foci formation media
Day 20
Day 21
Day 22
Day 23
Day 24		Stain foci formation

## Sheet: Supplemental Table 3
	baseMean	log2FoldChange	lfcSE	pvalue	padj
ENSG00000227232	281.709	-0.0244054	0.105569	0.679439	0.942756
ENSG00000278267	23.5513	0.00730473	0.122082	0.812541	NA
ENSG00000238009	10.2506	-0.0148707	0.1256	0.438757	NA
ENSG00000233750	68.6856	0.0706373	0.142027	0.145167	0.62685
ENSG00000268903	387.471	0.0768683	0.123986	0.239931	0.742146
ENSG00000269981	922.532	0.138586	0.15125	0.082453	0.510704
ENSG00000239906	35.344	0.00105246	0.119541	0.979505	0.996575
ENSG00000241860	134.573	0.00705691	0.112113	0.891726	0.983711
ENSG00000222623	29.9375	0.00857258	0.121684	0.792121	NA
ENSG00000279457	110.919	0.00600036	0.111888	0.908667	0.986906
ENSG00000228463	41.3362	-0.00607918	0.1198	0.868147	0.978159
ENSG00000237094	501.164	-0.0197594	0.0997079	0.747462	0.957412
ENSG00000250575	10.2358	0.00973326	0.1249	0.608139	NA
ENSG00000225972	12828.1	0.115176	0.128691	0.12458	0.593067
ENSG00000225630	440.299	0.0142786	0.1108	0.786467	0.964627
ENSG00000237973	9316.58	-0.143124	0.157107	0.0708633	0.479472
ENSG00000229344	78.5468	-0.160573	0.322128	0.0080299	0.164435
ENSG00000248527	7907.72	-0.0380021	0.11364	0.463589	0.881553
ENSG00000198744	25.1536	0.00292133	0.121317	0.930242	NA
ENSG00000228327	720.66	0.0503927	0.104745	0.430262	0.868114
ENSG00000237491	160.658	0.0573732	0.120645	0.334686	0.812535
ENSG00000177757	37.2995	0.00329017	0.120019	0.929163	0.990447
ENSG00000228794	232.202	0.0673286	0.123698	0.276729	0.770415
ENSG00000225880	67.6231	-0.0155983	0.119563	0.705258	0.950043
ENSG00000272438	18.4262	0.0369311	0.131687	0.114058	NA
ENSG00000230699	68.5802	0.107395	0.188054	0.0287427	0.328924
ENSG00000223764	168.282	0.0223305	0.127386	0.231323	0.734117
ENSG00000187634	293.014	0.0275184	0.128463	0.197158	0.695632
ENSG00000188976	2592.85	0.0150025	0.105352	0.776581	0.962702
ENSG00000187961	3078.13	0.115949	0.12197	0.122372	0.59013
ENSG00000187583	655.797	0.149031	0.145815	0.0696305	0.477117
ENSG00000187642	200.931	-0.0105499	0.106912	0.851683	0.974263
ENSG00000272512	246.698	0.0327878	0.12375	0.429256	0.86785
ENSG00000188290	536.044	0.00405324	0.112197	0.938399	0.991439
ENSG00000187608	234.64	0.0830995	0.137859	0.178773	0.676674
ENSG00000224969	19.8202	0.00737093	0.123001	0.788125	NA
ENSG00000188157	45476.5	-0.0959031	0.110699	0.184391	0.679477
ENSG00000217801	452.939	0.209388	0.170558	0.0283571	0.328525
ENSG00000273443	99.0109	0.955385	0.302008	6.34744e-05	0.00763194
ENSG00000237330	244.989	0.0298107	0.111562	0.59509	0.923853
ENSG00000131591	1112.71	0.0524102	0.109766	0.410302	0.85904
ENSG00000207730	47.2673	-0.0623415	0.140208	0.133884	0.610421
ENSG00000207607	13.893	0.000160517	0.123463	0.996692	NA
ENSG00000198976	30.0195	0.02767	0.126082	0.371364	NA
ENSG00000272141	159.816	-0.0609358	0.129263	0.261458	0.758981
ENSG00000205231	19.4938	0.0104643	0.122834	0.719307	NA
ENSG00000162571	30.0676	0.00235622	0.122211	0.937394	0.991439
ENSG00000186891	21.5423	0.0142964	0.123091	0.635614	NA
ENSG00000078808	4077.59	-0.0693069	0.119903	0.28008	0.773022
ENSG00000176022	509.844	-0.0232382	0.112614	0.664151	0.940872
ENSG00000184163	87.0412	-0.0282373	0.120525	0.5245	0.90055
ENSG00000260179	48.8093	-0.00179191	0.11888	0.961609	0.992822
ENSG00000160087	1201.76	0.0295599	0.0997746	0.637659	0.935592
ENSG00000230415	44.1093	-0.0351534	0.127085	0.326752	0.807634
ENSG00000162572	133.052	0.0526514	0.132625	0.223835	0.725791
ENSG00000131584	3549.04	0.018066	0.0967094	0.774298	0.962585
ENSG00000169972	338.587	0.0288211	0.115778	0.578673	0.919419
ENSG00000127054	4701.32	0.030236	0.0951112	0.583814	0.919934
ENSG00000240731	204.064	0.0711004	0.126659	0.251127	0.748543
ENSG00000224051	699.618	0.00906856	0.105771	0.876429	0.980696
ENSG00000169962	207.215	0.0199028	0.113015	0.704881	0.950043
ENSG00000107404	5391.22	-0.0126146	0.10086	0.835825	0.97291
ENSG00000162576	290.372	0.0353875	0.117918	0.496201	0.892133
ENSG00000175756	394.317	-0.0350958	0.115997	0.511618	0.897867
ENSG00000221978	7291.07	0.0842701	0.109969	0.228865	0.732173
ENSG00000224870	310.622	0.0465353	0.114499	0.432634	0.868831
ENSG00000242485	763.522	-0.025739	0.105081	0.838763	0.973175
ENSG00000272455	129.634	-0.0717641	0.138986	0.176274	0.674119
ENSG00000235098	101.724	-0.0377591	0.120519	0.447211	0.876939
ENSG00000225285	28.0899	-0.0215218	0.124454	0.479654	NA
ENSG00000179403	1463.24	-0.0809824	0.124748	0.21285	0.715863
ENSG00000215915	63.2667	-0.0355297	0.123343	0.418429	0.86203
ENSG00000160072	1604.95	0.0854939	0.127805	0.198292	0.697398
ENSG00000197785	1044.67	0.0494992	0.119668	0.382934	0.844265
ENSG00000205090	42.4249	0.00205185	0.121492	0.950298	0.992305
ENSG00000160075	1884.11	-0.028253	0.10178	0.64512	0.936017
ENSG00000215014	11.1991	0.00648331	0.123885	0.778294	NA
ENSG00000228594	222.955	-0.453066	0.279211	0.00424609	0.116784
ENSG00000272106	65.7465	-0.0725975	0.145564	0.118814	0.585912
ENSG00000197530	1974.99	0.00658793	0.100997	0.914201	0.987641
ENSG00000248333	817.084	0.0763865	0.116406	0.257169	0.754891
ENSG00000189339	2088.64	0.0133749	0.0913687	0.830124	0.970817
ENSG00000269737	197.54	0.0816369	0.130425	0.209096	0.710588
ENSG00000008128	467.475	0.0923172	0.126651	0.184824	0.679818
ENSG00000268575	241.731	-0.0644474	0.126204	0.272161	0.768016
ENSG00000227775	228.398	-0.0460281	0.120115	0.397952	0.85223
ENSG00000215790	296.193	0.000265612	0.102866	0.997676	0.999344
ENSG00000008130	2155.65	0.0376676	0.0972842	0.557626	0.912297
ENSG00000078369	5578.84	-0.0979393	0.121214	0.166724	0.658327
ENSG00000231050	168.036	-0.146648	0.198857	0.0533738	0.427447
ENSG00000169885	16.2793	0.0109176	0.123192	0.697049	NA
ENSG00000178821	124.355	-0.0605849	0.13375	0.217006	0.719664
ENSG00000142609	58.1074	0.0347524	0.128071	0.290887	0.780632
ENSG00000187730	14.5904	-0.0302326	0.128601	0.222909	NA
ENSG00000067606	1275.34	0.145491	0.132459	0.0725841	0.484483
ENSG00000271806	159.57	0.128125	0.181787	0.0690145	0.475092
ENSG00000182873	161.309	0.275156	0.350078	0.0171105	0.253981
ENSG00000162585	983.209	-0.0396667	0.102148	0.529711	0.90199
ENSG00000157933	2535.13	0.00625408	0.0956327	0.920607	0.988668
ENSG00000116151	481.679	-0.025674	0.109991	0.649319	0.936646
ENSG00000269896	42.7543	0.0296097	0.123893	0.445038	0.876821
ENSG00000272420	16.6932	-0.0447586	0.134592	0.101413	NA
ENSG00000157916	1793.7	-0.0284704	0.104165	0.640418	0.936017
ENSG00000157911	430.476	-0.0747713	0.124116	0.245624	0.746261
ENSG00000149527	220.733	0.126813	0.175869	0.0756387	0.492676
ENSG00000157881	1343.56	0.00952329	0.0972548	0.878914	0.980975
ENSG00000197921	25.482	0.0378281	0.130231	0.211694	NA
ENSG00000272449	24.9672	0.0292322	0.127372	0.302479	NA
ENSG00000238164	297.761	0.403075	0.283281	0.0065775	0.14613
ENSG00000157873	1672.01	0.0772217	0.124475	0.238695	0.741827
ENSG00000225931	10.911	-0.0063039	0.124194	0.763697	NA
ENSG00000228037	24.4944	-0.0148041	0.122758	0.636641	NA
ENSG00000157870	403.46	0.042164	0.106336	0.500205	0.89351
ENSG00000142606	26.0899	0.0153252	0.122688	0.633986	NA
ENSG00000215912	276.407	0.0330447	0.116259	0.532817	0.902396
ENSG00000142611	34.1969	1.34446	0.532418	0.000385477	0.0279734
ENSG00000130762	1671.37	-0.00279176	0.0947948	0.960281	0.992822
ENSG00000272088	30.4959	0.00171423	0.120707	0.960844	0.992822
ENSG00000162591	4427.68	0.0404001	0.122391	0.41025	0.85904
ENSG00000238260	11.6827	-0.0128716	0.124502	0.579518	NA
ENSG00000158109	768.741	-0.138903	0.143929	0.0814007	0.509387
ENSG00000116213	955.827	0.0122893	0.101727	0.840039	0.973254
ENSG00000078900	404.856	0.0560424	0.114833	0.368321	0.834749
ENSG00000227589	20.2407	0.0021525	0.123065	0.935457	NA
ENSG00000235131	13.8627	0.0191654	0.125403	0.437131	NA
ENSG00000227372	395.222	-0.0918896	0.135642	0.168776	0.662112
ENSG00000162592	10.7107	0.0016951	0.124179	0.934666	NA
ENSG00000235169	80.2518	-0.0101907	0.114865	0.8295	0.970817
ENSG00000130764	791.224	0.0157013	0.0990129	0.793367	0.965226
ENSG00000266075	13.8455	0.0129437	0.123868	0.623121	NA
ENSG00000272153	39.5171	-0.0284443	0.123737	0.453513	0.878167
ENSG00000116198	1333.04	-0.00616838	0.0942236	0.91949	0.98854
ENSG00000169598	237.317	-0.00469105	0.107423	0.931985	0.990978
ENSG00000198912	897.801	-0.100252	0.123686	0.16275	0.65257
ENSG00000236423	64.9073	0.0145344	0.117117	0.74786	0.957494
ENSG00000196581	206.462	0.0174575	0.125261	0.465303	0.882992
ENSG00000131697	1754.73	0.0454106	0.109909	0.461712	0.880911
ENSG00000069424	1085.39	-0.208025	0.17433	0.0294501	0.331034
ENSG00000116254	128.844	0.358041	0.296968	0.00971987	0.182069
ENSG00000116251	1608.87	-0.0786325	0.106599	0.25326	0.750376
ENSG00000226944	9.53169	-0.0304276	0.129851	0.112487	NA
ENSG00000158286	2960.97	0.142125	0.174267	0.0708299	0.479472
ENSG00000116237	2143.27	-0.0488462	0.12096	0.371185	0.836564
ENSG00000225077	9.93839	-0.042259	0.134547	0.0571371	NA
ENSG00000158292	3221.14	-0.0145006	0.115581	0.758043	0.959046
ENSG00000097021	1352.61	-0.0118352	0.116295	0.793042	0.965226
ENSG00000069812	1014.39	-0.124966	0.17479	0.0766796	0.496446
ENSG00000187017	1772.89	-0.0623234	0.122582	0.29792	0.784327
ENSG00000231868	109.99	-0.0816323	0.148062	0.125747	0.595127
ENSG00000215788	1111	-0.117298	0.142766	0.113907	0.576974
ENSG00000171680	3107.32	-0.0858548	0.116611	0.214913	0.717704
ENSG00000162408	1314.96	-0.0208562	0.0980629	0.736687	0.956268
ENSG00000229519	54.9272	0.0477032	0.129845	0.265789	0.762397
ENSG00000173662	15.3492	-0.0139032	0.123834	0.604199	NA
ENSG00000204859	606.659	0.0203378	0.102148	0.739509	0.956268
ENSG00000162413	2328.94	0.0567242	0.104159	0.391108	0.848044
ENSG00000116273	759.5	-0.0568687	0.112969	0.368378	0.834749
ENSG00000041988	510.587	-0.0229513	0.107216	0.693277	0.94703
ENSG00000007923	846.31	-0.0373423	0.101945	0.552443	0.909578
ENSG00000171735	372.907	0.0773717	0.124361	0.238763	0.741827
ENSG00000227950	24.1894	-0.00340423	0.12209	0.907223	NA
ENSG00000049245	1099.31	-0.133746	0.149976	0.0895336	0.528441
ENSG00000269925	29.3397	0.0122685	0.121591	0.718778	NA
ENSG00000049246	1247.42	-0.00892355	0.122121	0.770527	0.962387
ENSG00000236266	47.7095	-0.0302967	0.127836	0.277785	0.771555
ENSG00000049249	150.732	3.40221	0.304202	3.01081e-30	1.33943e-26
ENSG00000116288	762.344	-0.0223844	0.113477	0.660435	0.93997
ENSG00000200344	11.0343	-0.00918428	0.124394	0.665476	NA
ENSG00000116285	1619.33	0.592333	0.15558	8.22577e-06	0.00146304
ENSG00000142599	4386.64	0.0437757	0.108633	0.431947	0.868831
ENSG00000232912	65.0552	0.0129979	0.120152	0.734422	0.956037
ENSG00000221083	9.43831	-0.00316022	0.123929	0.881626	NA
ENSG00000234619	41.5782	0.000859885	0.119273	0.985157	0.998249
ENSG00000224315	41.4616	0.0619885	0.140398	0.129601	0.60198
ENSG00000222511	26.791	-0.0267439	0.125128	0.414859	NA
ENSG00000226545	25.8712	0.0260366	0.124498	0.447081	NA
ENSG00000228423	17.9506	-0.0104146	0.12335	0.697253	NA
ENSG00000074800	17051.2	-0.192375	0.219323	0.037287	0.371246
ENSG00000236269	265.981	0.0157307	0.106653	0.783526	0.964424
ENSG00000180758	733.441	-0.0781533	0.116283	0.248437	0.747535
ENSG00000228526	129.568	-0.00930097	0.113284	0.850046	0.973878
ENSG00000234546	45.6937	-0.0505059	0.135439	0.144104	0.624751
ENSG00000049239	1215.07	-0.0363852	0.119121	0.475709	0.884544
ENSG00000171621	522.227	0.0144024	0.0994802	0.814214	0.968863
ENSG00000171612	175.446	0.0268944	0.114137	0.61602	0.930142
ENSG00000231181	18.6431	-0.00656817	0.122926	0.806523	NA
ENSG00000188807	2148.27	-0.0165789	0.110616	0.757724	0.958943
ENSG00000171608	840.453	0.0570723	0.112916	0.366814	0.833647
ENSG00000231789	31.3784	-0.0128979	0.122592	0.675849	0.942455
ENSG00000171603	15155.5	-0.235622	0.1533	0.0152969	0.240255
ENSG00000271264	30.3938	0.0121577	0.122888	0.683847	0.944144
ENSG00000178585	658.597	-0.193202	0.161062	0.0345017	0.358731
ENSG00000162441	322.668	-0.0109055	0.105492	0.84998	0.973878
ENSG00000228150	32.3177	-0.0111012	0.121488	0.740421	0.956268
ENSG00000173614	112.254	0.0156096	0.115151	0.748602	0.957762
ENSG00000202415	65.9066	0.0822037	0.150094	0.115595	0.579862
ENSG00000283611	34.0298	0.00991787	0.120929	0.778458	0.962762
ENSG00000162444	89.0174	-0.0130644	0.11434	0.788049	0.964627
ENSG00000130939	2509.41	-0.0586026	0.105254	0.374879	0.838505
ENSG00000224340	20.511	-0.0110539	0.123213	0.690208	NA
ENSG00000233623	45.0444	0.0121586	0.120422	0.746703	0.957309
ENSG00000201746	10.1701	-0.0118413	0.124645	0.585639	NA
ENSG00000054523	3375.01	0.00734148	0.0906922	0.899538	0.98582
ENSG00000199562	19.6825	0.00925749	0.122861	0.746324	NA
ENSG00000142657	3150.41	-0.390843	0.206288	0.0033322	0.102984
ENSG00000251503	10.8466	0.00414165	0.124548	0.823146	NA
ENSG00000175279	21.4598	0.0570288	0.140724	0.0783929	NA
ENSG00000241563	15.9686	0.00155858	0.122853	0.955208	NA
ENSG00000160049	1253.55	-0.0788973	0.109153	0.260233	0.758221
ENSG00000142655	702.94	-0.0462342	0.107618	0.459949	0.880796
ENSG00000243267	42.2794	-0.0349544	0.126534	0.343739	0.819073
ENSG00000130940	736.643	0.19209	0.214895	0.0374563	0.371249
ENSG00000272078	100.399	0.0716706	0.1422	0.149552	0.634244
ENSG00000120948	1724.22	-0.0495413	0.104959	0.42927	0.86785
ENSG00000009724	172.1	0.0197947	0.115459	0.693122	0.94703
ENSG00000271895	51.8038	-0.0139606	0.120714	0.704793	0.950043
ENSG00000116649	1073.32	0.00637216	0.111467	0.903687	0.98582
ENSG00000171824	2441.13	-0.0121228	0.0927228	0.846097	0.973572
ENSG00000226849	49.9235	0.0622576	0.138188	0.164143	0.654327
ENSG00000198793	3986.14	0.0306418	0.0998904	0.623143	0.932775
ENSG00000225602	34.5002	0.027642	0.123481	0.468824	0.883007
ENSG00000171819	103.527	0.0121633	0.114607	0.802993	0.966885
ENSG00000120942	519.521	0.0049196	0.104914	0.932298	0.991114
ENSG00000238199	18.7009	-0.0262612	0.126572	0.340507	NA
ENSG00000204624	10.9931	0.00346301	0.124257	0.863976	NA
ENSG00000116661	565.811	-0.149941	0.166696	0.0655457	0.467259
ENSG00000132879	1005.85	-0.0623968	0.108684	0.343605	0.819057
ENSG00000116663	129.839	0.00137057	0.114397	0.979089	0.996575
ENSG00000116670	585.914	-0.188764	0.180966	0.0393102	0.378736
ENSG00000177674	1544.25	-0.0586549	0.116176	0.346694	0.821383
ENSG00000177000	711.234	0.0472707	0.111012	0.44599	0.876882
ENSG00000011021	2306.87	0.0860272	0.112843	0.24545	0.746261
ENSG00000242349	117.444	0.104838	0.159531	0.102343	0.554889
ENSG00000175206	44.8333	0.0571008	0.136886	0.160908	0.650988
ENSG00000199347	21.6637	-0.0088874	0.124011	0.699977	NA
ENSG00000116685	2433.97	-0.24973	0.222431	0.0200493	0.274444
ENSG00000083444	7575.75	-0.356762	0.233115	0.0060862	0.141468
ENSG00000116688	3663.31	-0.0512293	0.109527	0.418752	0.862165
ENSG00000116691	932.056	-0.012909	0.102932	0.827049	0.970595
ENSG00000202461	65.7169	-0.0224792	0.120104	0.593389	0.923551
ENSG00000120949	304.472	-0.0128383	0.125013	0.534717	0.90261
ENSG00000028137	494.822	-0.0474171	0.114306	0.430431	0.868132
ENSG00000048707	5896.42	-0.00462554	0.100503	0.937341	0.991439
ENSG00000239149	38.1242	-0.00525054	0.122164	0.857972	0.97587
ENSG00000162496	7734.32	-0.0273682	0.125415	0.397545	0.852115
ENSG00000221340	27.7562	0.0533104	0.138461	0.0913139	NA
ENSG00000276830	9.113	0.0114895	0.124948	0.566264	NA
ENSG00000272482	123.725	-0.0127879	0.121078	0.717149	0.951418
ENSG00000162494	131.936	0.00703955	0.12514	0.652794	0.937039
ENSG00000162493	565.34	-0.118362	0.165144	0.0891389	0.527336
ENSG00000116731	1972.26	0.0359956	0.095613	0.574481	0.91866
ENSG00000189337	337.565	-0.00852342	0.101695	0.886199	0.982059
ENSG00000175147	101.991	-0.0209635	0.11774	0.64701	0.936295
ENSG00000171729	560.683	-0.0411116	0.106421	0.507724	0.896925
ENSG00000204464	68.8536	-0.014937	0.118135	0.726327	0.95472
ENSG00000215720	44.0168	0.00737023	0.119226	0.853591	0.974787
ENSG00000142621	167.951	-0.0147169	0.111757	0.777759	0.962762
ENSG00000236045	10.7234	-0.0104703	0.124711	0.607936	NA
ENSG00000228140	18.6416	-0.00283059	0.122246	0.920308	NA
ENSG00000142634	1792.33	-0.000573696	0.106325	0.990154	0.99908
ENSG00000142615	10.135	-0.0332023	0.130482	0.121099	NA
ENSG00000215704	48.5704	-0.0275053	0.122933	0.481098	0.886371
ENSG00000132906	372.226	-0.0173617	0.113672	0.732035	0.956037
ENSG00000116138	1222	-0.048787	0.101126	0.452514	0.878167
ENSG00000251866	6.81035	0.00895334	0.125153	0.591983	NA
ENSG00000272510	10.6213	0.00153574	0.124147	0.941543	NA
ENSG00000116771	49.798	0.0174576	0.122233	0.614694	0.929194
ENSG00000237301	24.8849	-0.0414605	0.131462	0.190398	NA
ENSG00000197312	1361.86	0.0407495	0.0999643	0.522823	0.90055
ENSG00000116786	3167	-0.044917	0.0959849	0.487066	0.888554
ENSG00000237938	289.578	-0.0675521	0.118486	0.292304	0.780891
ENSG00000162461	85.6839	-0.0326153	0.121798	0.466081	0.883007
ENSG00000162458	1711.04	-0.00518823	0.103166	0.928525	0.990424
ENSG00000224321	15.3236	0.0222525	0.125741	0.400843	NA
ENSG00000233954	30.9816	-0.0373641	0.128679	0.273234	0.769458
ENSG00000178715	11.7834	0.00770411	0.12455	0.699133	NA
ENSG00000179743	132.79	-0.0592949	0.129631	0.261573	0.758981
ENSG00000065526	7200.36	0.0834005	0.103749	0.22849	0.731851
ENSG00000270620	12.0137	-0.00199016	0.123797	0.926015	NA
ENSG00000116809	692.552	0.294996	0.178192	0.00821839	0.166948
ENSG00000234607	22.7252	0.0449833	0.133079	0.164405	NA
ENSG00000173641	8.95358	0.00171188	0.12458	0.924345	NA
ENSG00000186510	30.2732	0.0295618	0.125689	0.388207	0.846872
ENSG00000184908	38.2522	-0.0113991	0.122502	0.707753	0.950391
ENSG00000185519	99.5153	-0.103076	0.162781	0.0927739	0.535141
ENSG00000142627	9423.38	0.0292803	0.112326	0.630489	0.934142
ENSG00000227959	147.261	0.0263097	0.123617	0.476383	0.884645
ENSG00000224621	35.4054	0.0333208	0.12763	0.304411	0.78932
ENSG00000142632	1003.29	-0.164162	0.184806	0.0529595	0.426046
ENSG00000237276	45.5768	-0.0124081	0.120088	0.743806	0.956516
ENSG00000132881	79.9199	-0.0387544	0.12218	0.419463	0.862632
ENSG00000037637	798.698	0.260775	0.162338	0.0113641	0.201218
ENSG00000055070	1658.5	-0.0778823	0.119197	0.245783	0.74631
ENSG00000226457	43.4683	-0.0121241	0.121271	0.725634	0.954524
ENSG00000187144	36.7287	0.00241838	0.119894	0.948677	0.992305
ENSG00000157191	583.98	0.450046	0.165803	0.000423443	0.0300206
ENSG00000226029	100.039	0.0302691	0.119382	0.523956	0.90055
ENSG00000080947	308.31	0.0548621	0.121447	0.3416	0.818358
ENSG00000206652	53.0051	-0.00368803	0.122058	0.899071	0.985747
ENSG00000261135	13.9286	-0.0177825	0.125242	0.459228	NA
ENSG00000233421	14.7754	0.00191912	0.123261	0.940339	NA
ENSG00000219481	1518.9	-0.00453571	0.105209	0.935929	0.991439
ENSG00000271732	18.1459	0.0205312	0.124581	0.483029	NA
ENSG00000215908	1394.12	0.0426786	0.102055	0.484633	0.887526
ENSG00000186301	266.799	-0.0440699	0.121141	0.400345	0.852884
ENSG00000207513	12.6802	-0.0270483	0.1287	0.151889	NA
ENSG00000280114	63.8853	0.0663426	0.137962	0.179365	0.67701
ENSG00000268869	164.303	0.00112076	0.117927	0.980236	0.996632
ENSG00000279151	16.1183	0.00392363	0.12305	0.881654	NA
ENSG00000058453	805.652	0.0123331	0.10332	0.836628	0.97291
ENSG00000207389	17.8646	-0.095799	0.181905	0.00624274	NA
ENSG00000186715	167.601	0.0139993	0.115664	0.768588	0.961782
ENSG00000228549	45.1473	0.014008	0.119024	0.734265	0.956037
ENSG00000238142	23.7265	-0.0114481	0.122209	0.715771	NA
ENSG00000235241	16.0888	-0.00116433	0.122653	0.964006	NA
ENSG00000207005	16.1333	-0.0243294	0.12618	0.363943	NA
ENSG00000272426	26.8798	0.0187342	0.123054	0.571206	NA
ENSG00000117122	1375.38	-0.0998082	0.117631	0.165937	0.657183
ENSG00000226526	21.2942	0.0199614	0.12449	0.49279	NA
ENSG00000159363	1963.39	-0.0270998	0.113726	0.618867	0.931624
ENSG00000117118	676.459	-0.109332	0.127388	0.138525	0.6168
ENSG00000117115	191.307	-0.0120667	0.114789	0.800254	0.966302
ENSG00000204362	162.155	-0.0176574	0.113523	0.728384	0.955498
ENSG00000142623	1927.22	-0.0350103	0.12014	0.472845	0.883882
ENSG00000142619	1207.85	-0.804488	0.193027	1.51161e-06	0.000353936
ENSG00000266634	24.0995	-0.0198595	0.125224	0.445449	NA
ENSG00000276747	610.325	0.0111798	0.112376	0.82996	0.970817
ENSG00000179051	5759.2	-0.0488067	0.0950348	0.478019	0.884947
ENSG00000074964	2333.48	0.0093623	0.109781	0.864487	0.977677
ENSG00000159423	152.34	-0.0387436	0.117041	0.473746	0.88419
ENSG00000169991	422.024	0.0264375	0.116258	0.601423	0.925806
ENSG00000272084	73.2952	0.0205504	0.11734	0.659017	0.939068
ENSG00000127481	23035.9	0.00526655	0.0898037	0.947067	0.992305
ENSG00000127463	4396.64	-0.211484	0.183254	0.0316459	0.344428
ENSG00000053372	332.163	-0.011361	0.114532	0.812364	0.968435
ENSG00000211454	18.7807	0.00865875	0.123264	0.747874	NA
ENSG00000162482	35.4369	-0.0486384	0.132095	0.217573	0.719916
ENSG00000270728	35.0665	-0.024759	0.12353	0.488454	0.888631
ENSG00000053371	419.494	-0.0889441	0.123562	0.197513	0.695851
ENSG00000200403	20.7367	-0.0434435	0.134264	0.093863	NA
ENSG00000040487	422.209	0.0342757	0.117646	0.509341	0.897665
ENSG00000077549	1681.09	-0.0453815	0.10568	0.471845	0.883657
ENSG00000173436	168.037	0.058072	0.128347	0.276709	0.770415
ENSG00000226396	50.6554	0.085102	0.156396	0.0821059	0.509974
ENSG00000158747	626.965	-0.230117	0.229607	0.0248195	0.306498
ENSG00000162542	466.947	0.0291265	0.103452	0.635444	0.935575
ENSG00000169914	447.985	0.100277	0.130521	0.158745	0.647313
ENSG00000227066	95.0617	0.00279782	0.115027	0.953674	0.992537
ENSG00000187980	18.1083	-0.0346678	0.129348	0.221943	NA
ENSG00000162545	470.357	0.0245328	0.111147	0.658956	0.939068
ENSG00000090432	516.246	0.0152435	0.107453	0.787733	0.964627
ENSG00000158825	477.576	-0.180414	0.193585	0.0431477	0.393549
ENSG00000158828	436.073	-0.00744281	0.103584	0.905931	0.986117
ENSG00000117242	240.991	-0.107353	0.141388	0.131723	0.605687
ENSG00000244038	6710.54	-0.314485	0.19113	0.00658967	0.14613
ENSG00000117245	72.7876	0.050337	0.128208	0.292673	0.78153
ENSG00000189410	594.05	0.0114933	0.124965	0.568023	0.917094
ENSG00000127483	6765.24	-0.0913546	0.113075	0.201314	0.702013
ENSG00000075151	2914.15	0.0589173	0.10098	0.388929	0.847257
ENSG00000233072	8.21116	0.00990791	0.124941	0.599837	NA
ENSG00000236073	12.2763	-0.00344712	0.123704	0.877848	NA
ENSG00000235112	43.0604	0.0468477	0.131435	0.228357	0.731851
ENSG00000117298	3317.64	-0.0719125	0.120038	0.267559	0.764854
ENSG00000236936	35.5451	0.0189225	0.123162	0.563551	0.915126
ENSG00000231105	35.2145	0.0027836	0.120502	0.938007	0.991439
ENSG00000142794	486.218	0.0191094	0.101748	0.755024	0.95796
ENSG00000176378	16.3228	0.00498735	0.123494	0.838397	NA
ENSG00000162551	43.7174	-0.0105709	0.120203	0.774438	0.962585
ENSG00000076864	958.484	-0.139339	0.139335	0.0806134	0.506965
ENSG00000090686	1817.46	-0.0811772	0.107671	0.24009	0.742198
ENSG00000187942	67.5213	0.00711992	0.120493	0.84321	0.973271
ENSG00000142798	20215.2	-0.0150358	0.11218	0.770665	0.962387
ENSG00000232037	26.1063	-0.00823448	0.122332	0.78123	NA
ENSG00000218510	42.4701	-0.0350119	0.125163	0.382241	0.843767
ENSG00000070831	2368.76	-0.221386	0.163786	0.0233692	0.297468
ENSG00000230068	47.6006	0.00508991	0.118269	0.901863	0.98582
ENSG00000271428	61.2127	0.0241065	0.122655	0.523241	0.90055
ENSG00000271840	68.7111	-0.00196324	0.115941	0.961256	0.992822
ENSG00000162552	199.544	0.0715843	0.139869	0.171218	0.666011
ENSG00000184677	2245.69	0.177523	0.133023	0.0374053	0.371249
ENSG00000237200	57.541	0.0465322	0.128211	0.296769	0.783846
ENSG00000133216	2155.48	-0.402172	0.197523	0.0023243	0.0856333
ENSG00000225952	13.028	-0.0187495	0.125153	0.458149	NA
ENSG00000227868	10.4913	0.0168488	0.12534	0.458279	NA
ENSG00000004487	2985.08	-0.121818	0.116829	0.109117	0.569835
ENSG00000240553	9.79026	0.0227956	0.126806	0.306372	NA
ENSG00000266802	11.6047	-0.00951135	0.124245	0.670132	NA
ENSG00000169641	3409.69	0.0456129	0.108	0.461457	0.880911
ENSG00000229010	57.4782	0.0142656	0.120533	0.705942	0.95032
ENSG00000252578	9.37122	0.0280721	0.12852	0.196565	NA
ENSG00000179546	187.305	-0.00600281	0.113927	0.899919	0.98582
ENSG00000261326	521.037	-0.0528759	0.119794	0.360543	0.830009
ENSG00000125944	2940.2	-0.0981167	0.116898	0.17209	0.666304
ENSG00000125945	404.321	0.534831	0.184954	0.000212214	0.0181555
ENSG00000249087	139.382	-0.116009	0.176967	0.0705584	0.479395
ENSG00000204219	199.997	-0.051271	0.133131	0.205752	0.706826
ENSG00000232482	12.9168	-0.0111583	0.12494	0.5707	NA
ENSG00000088280	842.012	-0.0264395	0.109744	0.64144	0.936017
ENSG00000007968	338.916	-0.0429574	0.112589	0.468189	0.883007
ENSG00000235052	29.1045	-0.0236661	0.125956	0.381084	NA
ENSG00000117318	2106.6	0.0145477	0.114903	0.76634	0.960827
ENSG00000197880	36.3072	-0.0130391	0.123429	0.640359	0.936017
ENSG00000142676	3193.25	-0.0407307	0.104118	0.508295	0.896976
ENSG00000011007	1563.82	-0.0274306	0.104258	0.649665	0.936646
ENSG00000236810	35.353	-0.0374491	0.126489	0.342968	0.818908
ENSG00000057757	802.794	-0.0171991	0.101557	0.775834	0.962594
ENSG00000011009	1089.88	0.0334928	0.107211	0.581622	0.919934
ENSG00000117308	1485.28	-0.0311962	0.101486	0.613982	0.928891
ENSG00000117305	452.852	-0.0388372	0.11079	0.511883	0.897867
ENSG00000179163	621.146	-0.247069	0.181835	0.0172338	0.255137
ENSG00000189266	1525.94	-0.0313174	0.098317	0.627851	0.933278
ENSG00000188529	2449.58	-0.00750054	0.104129	0.896402	0.984902
ENSG00000142661	15.492	0.0237073	0.125994	0.380277	NA
ENSG00000142677	291.516	-0.0989329	0.13388	0.157798	0.646648
ENSG00000185436	764.033	-0.0175764	0.0994717	0.774155	0.962585
ENSG00000232298	12.5779	0.0135964	0.125061	0.520279	NA
ENSG00000158055	178.943	0.142118	0.216275	0.0417404	0.387693
ENSG00000001460	580.978	-0.0236987	0.0998741	0.71395	0.951418
ENSG00000001461	1896.79	-0.302252	0.145224	0.0034399	0.104638
ENSG00000117602	538.456	-0.0645963	0.126319	0.270754	0.766353
ENSG00000184454	24.7411	0.00398982	0.12338	0.873225	NA
ENSG00000133226	4975.35	-0.0100516	0.0967229	0.857654	0.97587
ENSG00000169504	1733.96	-0.017611	0.108105	0.754235	0.95796
ENSG00000020633	458.241	0.136197	0.146274	0.0855957	0.518616
ENSG00000117614	218.643	-0.0212754	0.112364	0.688851	0.945549
ENSG00000117616	1426.83	-0.172501	0.166213	0.0488412	0.412867
ENSG00000272432	13.787	0.00724116	0.124123	0.741969	NA
ENSG00000187010	116.518	0.0611424	0.129797	0.261459	0.758981
ENSG00000183726	804.74	-0.0993794	0.144808	0.138006	0.615494
ENSG00000188672	31.2508	-0.0197062	0.122762	0.565351	0.916115
ENSG00000204178	704.127	0.104475	0.120547	0.154341	0.64175
ENSG00000157978	972.111	-0.0289562	0.10041	0.641266	0.936017
ENSG00000117643	63.2526	-0.00138606	0.116883	0.972885	0.995129
ENSG00000162430	3389.86	-0.298824	0.16442	0.00622154	0.142304
ENSG00000228172	42.0813	-0.0299256	0.124254	0.430193	0.868114
ENSG00000117640	554.181	-0.0380122	0.1039	0.54215	0.904883
ENSG00000127423	301.351	0.0199712	0.112487	0.708847	0.95054
ENSG00000182749	1340.99	-0.302962	0.20917	0.0101693	0.1887
ENSG00000117632	2610.29	-0.462372	0.14877	0.000131811	0.013031
ENSG00000229786	7.80493	-0.0117653	0.125358	0.503861	NA
ENSG00000158006	171.618	-0.0485491	0.120722	0.377964	0.841028
ENSG00000158008	55.8466	0.0688219	0.144342	0.115033	0.578741
ENSG00000175087	196.562	-0.0341257	0.116899	0.513839	0.897867
ENSG00000197245	8.61506	0.00424383	0.124551	0.817675	NA
ENSG00000236782	36.7641	0.044239	0.130322	0.248184	0.747535
ENSG00000142675	1072.16	0.152587	0.155977	0.0661301	0.468839
ENSG00000236155	13.5526	-0.00454998	0.124591	0.799252	NA
ENSG00000130695	1581.64	-0.0702834	0.105626	0.289584	0.779952
ENSG00000270733	19.4008	0.0107236	0.122955	0.710185	NA
ENSG00000142669	1407.25	-0.086807	0.138196	0.172344	0.667145
ENSG00000158062	479.513	0.0559393	0.117874	0.35591	0.82743
ENSG00000169442	14.3528	-0.00945196	0.123419	0.717212	NA
ENSG00000176092	1195.65	-0.23845	0.181625	0.0194227	0.271719
ENSG00000225854	10.4781	0.0116246	0.124624	0.595297	NA
ENSG00000131914	7.81013	-0.0158562	0.126194	0.336893	NA
ENSG00000117682	966.86	0.0537058	0.1031	0.413248	0.859624
ENSG00000223583	17.21	-0.0108059	0.123613	0.676385	NA
ENSG00000225891	61.2186	0.0467247	0.127552	0.307656	0.792865
ENSG00000198830	3439.51	-0.273331	0.174483	0.0107964	0.195881
ENSG00000117676	1334.91	0.00783388	0.0942376	0.901697	0.98582
ENSG00000260063	11.6954	0.0210633	0.125982	0.381536	NA
ENSG00000117713	5715.51	0.046349	0.0996995	0.474979	0.88443
ENSG00000060642	442.475	-0.300148	0.193157	0.00874003	0.170536
ENSG00000204160	841.952	-0.072782	0.110894	0.27961	0.772653
ENSG00000175793	2261.9	-0.0315486	0.117031	0.535873	0.90261
ENSG00000142751	481.769	0.03399	0.10267	0.586716	0.920799
ENSG00000198746	151.733	0.0315963	0.115073	0.555557	0.911417
ENSG00000090273	650.729	-0.00276839	0.108328	0.958159	0.992822
ENSG00000175707	493.629	0.0294712	0.10064	0.637696	0.935592
ENSG00000253368	169.855	-0.0198079	0.117763	0.661355	0.940465
ENSG00000158246	131.968	0.0621694	0.128328	0.267377	0.764585
ENSG00000090020	4508.77	0.06665	0.125089	0.273458	0.769724
ENSG00000142784	745.202	-0.000444049	0.107145	0.948403	0.992305
ENSG00000186501	705.222	-0.00745993	0.100661	0.900414	0.98582
ENSG00000206888	14.6381	0.0559676	0.141958	0.0353361	NA
ENSG00000241547	54.9999	0.0277836	0.122237	0.498391	0.892889
ENSG00000142765	1850.39	-0.0662011	0.121373	0.295837	0.783554
ENSG00000142733	1266.32	-0.0346962	0.10247	0.565628	0.916115
ENSG00000142748	9.71486	-0.0063778	0.124141	0.764026	NA
ENSG00000174950	54.1969	-0.00925149	0.118548	0.818545	0.969196
ENSG00000181773	46.9076	0.0457541	0.134443	0.123845	0.59179
ENSG00000158195	4542.36	-0.113119	0.119549	0.127665	0.59895
ENSG00000241169	15.5816	0.00128438	0.123293	0.960291	NA
ENSG00000237429	9.90086	-0.0168852	0.12558	0.42928	NA
ENSG00000126705	1353.83	-0.000837156	0.0990027	0.988205	0.998255
ENSG00000000938	11.0156	0.000121139	0.124051	0.997517	NA
ENSG00000126709	219.643	0.00890395	0.110368	0.867567	0.978159
ENSG00000225886	10.6413	0.0149656	0.124881	0.519354	NA
ENSG00000009780	126.496	-0.00581655	0.111603	0.908959	0.986906
ENSG00000117758	369.313	0.0607732	0.113269	0.345448	0.820523
ENSG00000269971	16.9513	0.0127655	0.123676	0.636668	NA
ENSG00000117751	558.686	0.0336343	0.105694	0.599274	0.925149
ENSG00000252947	15.0142	-0.0312784	0.128724	0.220693	NA
ENSG00000130775	179.852	0.023902	0.114412	0.644	0.936017
ENSG00000117748	156.331	-0.0143408	0.109479	0.793596	0.965226
ENSG00000130768	198.83	-0.116192	0.159273	0.09906	0.546754
ENSG00000158156	220.021	-0.0323158	0.114716	0.54909	0.908273
ENSG00000158161	1086.74	-3.54298e-05	0.0946123	0.997919	0.999347
ENSG00000238231	16.804	0.0120857	0.123623	0.652233	NA
ENSG00000240750	15.8173	0.00421851	0.123295	0.868091	NA
ENSG00000169403	662.224	-0.065806	0.129481	0.246595	0.747428
ENSG00000126698	820.706	-0.075016	0.127588	0.235068	0.738138
ENSG00000130770	576.461	-0.0777134	0.122414	0.241286	0.743012
ENSG00000270605	40.98	-0.0619803	0.139761	0.139188	0.617431
ENSG00000130766	700.034	1.17541	0.160998	1.4676e-14	1.63224e-11
ENSG00000130772	131.723	0.133947	0.180195	0.068838	0.474612
ENSG00000204138	1217.86	0.0808384	0.106547	0.243753	0.745428
ENSG00000206779	11.7063	0.0220629	0.126473	0.336567	NA
ENSG00000229820	11.857	-0.00968226	0.124032	0.679761	NA
ENSG00000221216	9.6476	0.0173746	0.126221	0.343318	NA
ENSG00000180198	1154.28	-0.0281661	0.113345	0.602743	0.926451
ENSG00000242125	2419.02	-0.0326658	0.114124	0.557574	0.912297
ENSG00000200087	2658.05	0.0176671	0.0998417	0.780195	0.963184
ENSG00000231468	45.613	-0.0148731	0.120372	0.695037	0.947047
ENSG00000279443	10.1313	-0.00472779	0.124074	0.821434	NA
ENSG00000180098	501.348	-0.0362195	0.109179	0.544913	0.906999
ENSG00000197989	915.46	0.0849264	0.126035	0.20807	0.709809
ENSG00000221539	24.7309	-0.00384368	0.121264	0.902923	NA
ENSG00000120656	175.409	0.00146817	0.108124	0.980163	0.996632
ENSG00000188060	31.1451	-0.00627507	0.121629	0.841815	0.973254
ENSG00000229388	15.7444	-0.0294394	0.127757	0.276256	NA
ENSG00000274978	27.3075	-0.0144634	0.122652	0.644018	NA
ENSG00000162419	356.797	-0.0545306	0.113084	0.38213	0.843767
ENSG00000198492	1232.56	0.0608668	0.110948	0.349274	0.823076
ENSG00000159023	1640.09	-0.0259078	0.0999733	0.675326	0.942432
ENSG00000253304	356.595	-0.106632	0.144005	0.12942	0.60147
ENSG00000225750	12.484	0.00632749	0.124286	0.760593	NA
ENSG00000116350	2275.1	0.0106572	0.0934823	0.87189	0.97933
ENSG00000116353	436.225	-0.0443077	0.109022	0.471539	0.883657
ENSG00000237934	69.7068	0.0224326	0.118023	0.626251	0.932905
ENSG00000060656	1771.71	-0.0318825	0.104928	0.624705	0.932862
ENSG00000230523	17.8725	0.00837414	0.124795	0.655719	NA
ENSG00000186056	100.174	-0.0205616	0.114675	0.682029	0.943266
ENSG00000162511	34.6052	0.0300422	0.126937	0.329356	0.809843
ENSG00000162512	1106.13	-0.122464	0.145221	0.104398	0.559128
ENSG00000134644	3756.02	-0.0661261	0.100387	0.321378	0.804429
ENSG00000237329	63.6787	0.0111154	0.116842	0.804477	0.966885
ENSG00000232768	13.2468	0.0257797	0.127795	0.234246	NA
ENSG00000060688	839.874	-0.0696237	0.118477	0.277658	0.771555
ENSG00000229447	23.3621	-0.0172219	0.123875	0.553116	NA
ENSG00000121766	288.397	0.0478433	0.118558	0.400499	0.853035
ENSG00000229044	19.9491	0.0136897	0.124	0.603261	NA
ENSG00000121769	87.9315	0.0271186	0.117184	0.582846	0.919934
ENSG00000168528	14233.3	-0.0306171	0.112348	0.581765	0.919934
ENSG00000229167	25.2234	0.0197109	0.123764	0.5312	NA
ENSG00000142910	10895.8	0.0153663	0.0903641	0.804753	0.966885
ENSG00000121764	36.3492	-0.00849389	0.122828	0.761081	0.959404
ENSG00000162517	537.578	-0.102822	0.132246	0.150187	0.635722
ENSG00000235790	46.7341	0.0539397	0.133348	0.212776	0.715863
ENSG00000084636	1287.69	0.0947746	0.118703	0.183381	0.679035
ENSG00000121753	783.023	0.0130802	0.103064	0.827736	0.970685
ENSG00000134668	247.547	0.0464855	0.116393	0.431986	0.868831
ENSG00000269967	29.8239	0.0579485	0.13968	0.110979	NA
ENSG00000184007	1005.13	0.0133607	0.0949741	0.844266	0.973388
ENSG00000228634	68.4753	0.036942	0.123591	0.409357	0.858011
ENSG00000121774	1569.19	-0.0500367	0.106587	0.43243	0.868831
ENSG00000203325	49.7469	0.0186757	0.121938	0.605132	0.926684
ENSG00000121775	762.321	-0.0741134	0.123283	0.242482	0.744254
ENSG00000025800	2806.21	-0.105875	0.113318	0.146284	0.629398
ENSG00000084652	2042.46	-0.0207441	0.0953328	0.73408	0.956037
ENSG00000160050	141.931	0.0730159	0.141762	0.156078	0.643894
ENSG00000224066	21.628	0.0165868	0.123926	0.561978	NA
ENSG00000160051	211.277	-0.0370836	0.113927	0.510515	0.897867
ENSG00000222046	112.09	0.046112	0.12498	0.34809	0.82284
ENSG00000160055	646.672	0.0631608	0.10991	0.339319	0.817075
ENSG00000084623	1959.87	-0.178653	0.189666	0.0442615	0.397879
ENSG00000220785	191.29	-0.00663738	0.11093	0.897926	0.98536
ENSG00000183615	25.765	0.0321941	0.127169	0.32093	NA
ENSG00000182866	43.0476	-0.0245508	0.123791	0.479566	0.885624
ENSG00000116478	2659.69	-0.127954	0.128986	0.0986387	0.546604
ENSG00000175130	772.525	-0.0713727	0.116409	0.279333	0.772454
ENSG00000162526	83.544	-0.0482793	0.125574	0.330761	0.810572
ENSG00000225828	209.536	-0.0324605	0.11634	0.534657	0.90261
ENSG00000160058	1587.55	0.0111615	0.0951511	0.851411	0.974263
ENSG00000273274	86.2162	0.0123804	0.118907	0.762894	0.959753
ENSG00000160062	90.9373	0.0620477	0.129787	0.256116	0.754018
ENSG00000176261	176.271	-0.00807735	0.108362	0.882643	0.981772
ENSG00000200591	10.6641	0.00050449	0.124341	0.98099	NA
ENSG00000162521	1599.89	-0.110617	0.126989	0.132062	0.606427
ENSG00000162520	15.8896	-0.00590041	0.123734	0.798005	NA
ENSG00000224409	13.8635	-0.000809388	0.123483	0.970569	NA
ENSG00000162522	7550.48	-0.120037	0.138603	0.110611	0.571852
ENSG00000134684	2333.47	0.135193	0.128769	0.0841013	0.514771
ENSG00000116497	931.24	0.00953098	0.100573	0.876686	0.980696
ENSG00000160097	79.6186	0.00364823	0.118201	0.93315	0.99127
ENSG00000121905	33.6779	0.00867889	0.121611	0.791314	0.965226
ENSG00000121900	1390.69	-0.141604	0.145904	0.0787834	0.501951
ENSG00000116514	969.764	0.0136115	0.100485	0.839374	0.973182
ENSG00000236065	83.5422	0.0144622	0.115789	0.774479	0.962585
ENSG00000004455	1981.14	-0.0603793	0.113992	0.343262	0.819008
ENSG00000276645	24.1834	0.00241845	0.121728	0.939394	NA
ENSG00000142920	191.195	0.0409411	0.118039	0.451675	0.877845
ENSG00000278997	30.2755	-0.015889	0.123045	0.609154	0.927351
ENSG00000116525	196.706	0.00408019	0.10712	0.945012	0.991769
ENSG00000279179	45.2231	0.0576383	0.137955	0.144652	0.625464
ENSG00000160094	384.932	-0.0294232	0.114898	0.570841	0.917856
ENSG00000270115	38.9526	0.00261468	0.120494	0.941778	0.991769
ENSG00000225313	422.724	0.0371243	0.123477	0.419208	0.862506
ENSG00000134686	1074.85	0.0623351	0.132337	0.232102	0.73466
ENSG00000222112	33.2335	0.0197081	0.12271	0.567568	0.917094
ENSG00000233246	24.0758	-0.0186279	0.123529	0.550799	NA
ENSG00000121903	253.987	0.0285873	0.109505	0.6218	0.932225
ENSG00000163866	315.855	-0.0476046	0.115783	0.417092	0.861538
ENSG00000189280	658.484	-0.0368551	0.122703	0.422505	0.863733
ENSG00000189433	200.806	-0.0518209	0.118788	0.373058	0.838047
ENSG00000188910	2030.96	-0.0227571	0.113508	0.663519	0.940872
ENSG00000230163	21.5996	-0.0220938	0.125067	0.441905	NA
ENSG00000116544	22.0548	0.0413774	0.131791	0.176248	NA
ENSG00000241014	59.0919	-0.0169516	0.12286	0.599028	0.925112
ENSG00000271741	7.6314	0.0202765	0.127339	0.183397	NA
ENSG00000243749	15.9111	0.0060612	0.123329	0.812259	NA
ENSG00000163867	287.293	-0.0637557	0.125205	0.281201	0.774849
ENSG00000197056	1025.36	-0.210471	0.151439	0.0241125	0.302383
ENSG00000116560	5716.29	0.0105866	0.0976105	0.783913	0.964424
ENSG00000146463	1582.87	0.0526674	0.104145	0.417713	0.861641
ENSG00000240374	11.1765	0.0160116	0.125836	0.400294	NA
ENSG00000229994	33.6134	-0.00797446	0.120602	0.820633	0.969213
ENSG00000227409	9.66747	0.0128136	0.125065	0.529641	NA
ENSG00000142687	2092.95	-0.0161924	0.0932824	0.818139	0.969196
ENSG00000236274	23.932	0.0158727	0.123333	0.600553	NA
ENSG00000020129	747.901	0.133433	0.1477	0.0887739	0.525657
ENSG00000239636	37.5253	-0.00631438	0.121016	0.849371	0.973878
ENSG00000116819	110.862	0.0847426	0.144645	0.14931	0.634046
ENSG00000126067	1598.93	-0.115013	0.15653	0.101532	0.553807
ENSG00000142686	149.499	0.0180667	0.115953	0.710322	0.951236
ENSG00000092853	448.837	0.0762828	0.142976	0.152393	0.638289
ENSG00000134698	548.684	0.116861	0.150895	0.105684	0.562394
ENSG00000092847	2231.48	-0.0739174	0.106644	0.277087	0.770859
ENSG00000271164	11.9745	-0.00462201	0.124127	0.822054	NA
ENSG00000126070	1304.52	0.129498	0.125017	0.0966187	0.542786
ENSG00000271554	23.644	-0.0221941	0.124991	0.444258	NA
ENSG00000092850	15.2993	0.00560474	0.123499	0.820462	NA
ENSG00000116863	219.106	0.0417463	0.11174	0.485721	0.887686
ENSG00000171812	257.788	-0.044672	0.113174	0.451732	0.87786
ENSG00000054116	447.289	0.0344333	0.109935	0.559077	0.912731
ENSG00000116871	2371.71	0.0508993	0.118167	0.384785	0.84568
ENSG00000054118	3378.27	-0.0536848	0.102223	0.410398	0.85904
ENSG00000231849	23.4186	-0.0285755	0.126093	0.372773	NA
ENSG00000214193	1435.76	-0.0531347	0.106113	0.407959	0.856612
ENSG00000142694	193.013	-0.0163974	0.108213	0.770562	0.962387
ENSG00000116883	306.798	-0.0700012	0.123687	0.264311	0.760382
ENSG00000196182	881.793	0.582013	0.214199	0.000323261	0.0250106
ENSG00000181817	95.5707	0.160102	0.235668	0.0375758	0.371331
ENSG00000116885	58.3382	0.0406986	0.126694	0.334205	0.81224
ENSG00000116898	554.013	-0.0757121	0.123416	0.243638	0.745428
ENSG00000233621	76.2025	0.0286567	0.121259	0.511016	0.897867
ENSG00000163874	916.239	0.413095	0.248637	0.00463702	0.122395
ENSG00000163875	502.142	-0.0470011	0.111136	0.442367	0.875267
ENSG00000263675	16.3168	0.0169595	0.125919	0.388789	NA
ENSG00000163877	243.889	0.0358118	0.112316	0.52784	0.901296
ENSG00000232273	18.4788	-0.00948156	0.122949	0.733983	NA
ENSG00000163879	25.1003	0.0107223	0.123291	0.696573	NA
ENSG00000134697	980.347	-0.014567	0.101676	0.807637	0.966885
ENSG00000116922	259.902	0.028113	0.11039	0.611107	0.928527
ENSG00000134690	1181.98	-0.285501	0.223739	0.0135603	0.221992
ENSG00000183317	97.273	-0.00357657	0.116258	0.923107	0.989432
ENSG00000185090	730.673	-0.120299	0.136424	0.110551	0.571708
ENSG00000196449	255.415	0.104193	0.150324	0.122929	0.590426
ENSG00000197982	186.569	0.00075777	0.113156	0.989423	0.998683
ENSG00000188786	631.358	0.0784707	0.113731	0.251777	0.749031
ENSG00000235673	11.3431	0.0264728	0.128161	0.205585	NA
ENSG00000204084	383.459	0.0160156	0.104881	0.784038	0.964424
ENSG00000183431	1039.69	-0.0542207	0.10838	0.393359	0.849635
ENSG00000183386	346.689	-0.0264466	0.10427	0.665229	0.940873
ENSG00000183520	268.448	-0.0392592	0.11514	0.483586	0.887176
ENSG00000116954	375.86	0.0462021	0.116061	0.427442	0.86707
ENSG00000228436	25.3667	0.0150185	0.123925	0.586405	NA
ENSG00000214114	208.333	-0.115711	0.162595	0.0942532	0.539131
ENSG00000274944	10.4983	-0.0149129	0.125535	0.447236	NA
ENSG00000158315	276.108	-0.0235582	0.112018	0.662951	0.940872
ENSG00000174574	654.842	0.0551645	0.122276	0.33539	0.812695
ENSG00000168653	234.17	-0.10335	0.149825	0.124312	0.592607
ENSG00000127603	10690.3	0.0236661	0.114989	0.584513	0.920305
ENSG00000206654	14.2847	-0.00793837	0.124374	0.700609	NA
ENSG00000183682	21.0656	0.0287395	0.127531	0.288132	NA
ENSG00000237624	10.9837	0.0115611	0.124469	0.61014	NA
ENSG00000182109	65.3712	0.0364845	0.124716	0.397514	0.852115
ENSG00000243970	24.8324	-0.0699374	0.150822	0.0383131	NA
ENSG00000090621	4166.47	-0.216777	0.148246	0.0204167	0.277873
ENSG00000228060	104.583	-0.0493501	0.124833	0.333528	0.812086
ENSG00000201457	36.1395	-0.0071074	0.119608	0.849109	0.973878
ENSG00000163909	53.3397	0.0194544	0.12149	0.60679	0.926684
ENSG00000084072	678.081	-0.005519	0.100337	0.928025	0.990424
ENSG00000116985	211.961	-0.0132334	0.109774	0.806789	0.966885
ENSG00000198754	32.7106	0.0104099	0.121674	0.753625	0.95796
ENSG00000261798	16.6353	-0.032937	0.129043	0.224149	NA
ENSG00000043514	478.426	0.12123	0.136087	0.110723	0.571976
ENSG00000202222	19.5228	0.00164743	0.122945	0.951754	NA
ENSG00000116990	93.181	0.0488498	0.128635	0.285797	0.777141
ENSG00000168389	396.915	0.548552	0.211426	0.00047381	0.0329353
ENSG00000228477	45.5058	0.0336948	0.124434	0.407869	0.856612
ENSG00000131236	2544	-0.0629295	0.126043	0.294146	0.782394
ENSG00000131238	2463.05	-0.534275	0.165107	7.00252e-05	0.00803934
ENSG00000117000	986.714	0.0372776	0.100477	0.558558	0.912731
ENSG00000259943	43.1021	0.0316321	0.124247	0.423644	0.864635
ENSG00000084073	850.179	0.01682	0.109561	0.762622	0.959749
ENSG00000231296	23.0439	-0.0215966	0.124087	0.49513	NA
ENSG00000049089	217.011	0.0640788	0.13485	0.21057	0.712664
ENSG00000084070	278.514	0.00613135	0.109147	0.911884	0.987394
ENSG00000187801	41.2728	0.0213292	0.121442	0.583318	0.919934
ENSG00000260920	42.775	-0.048924	0.13078	0.24762	0.747535
ENSG00000187815	101.853	-0.0132183	0.114315	0.788554	0.964686
ENSG00000238287	41.0988	-0.0636712	0.14127	0.12482	0.593067
ENSG00000164002	175.2	0.0489924	0.117059	0.401943	0.853479
ENSG00000117010	42.0841	0.0530176	0.134951	0.177034	0.674297
ENSG00000117016	149.885	-0.0235784	0.115452	0.63851	0.935752
ENSG00000272145	96.8872	-0.150513	0.231174	0.0362408	0.366667
ENSG00000066136	1052.36	-0.0121177	0.100576	0.840962	0.973254
ENSG00000198974	18.5376	-0.00264386	0.122653	0.920494	NA
ENSG00000117013	72.0132	0.0395369	0.124282	0.385618	0.846263
ENSG00000179862	523.383	0.102532	0.142103	0.167119	0.659252
ENSG00000171793	1247.99	0.00624306	0.114414	0.917019	0.987952
ENSG00000281207	321.532	0.024894	0.11368	0.640344	0.936017
ENSG00000171790	222.119	-0.00336169	0.109332	0.948997	0.992305
ENSG00000010803	796.628	0.032842	0.101462	0.588528	0.921501
ENSG00000204060	78.0949	0.00592823	0.118343	0.885788	0.981877
ENSG00000229901	21.856	-0.000794543	0.122168	0.976384	NA
ENSG00000127124	799.891	0.0323457	0.108941	0.585228	0.920566
ENSG00000230638	67.8237	-0.022125	0.120118	0.597882	0.924844
ENSG00000198815	1484.75	0.0302761	0.101032	0.629442	0.933886
ENSG00000127125	263.284	0.00837091	0.103754	0.888982	0.983307
ENSG00000186409	50.0155	0.0494986	0.133892	0.180255	0.677448
ENSG00000171960	328.383	-0.116147	0.149249	0.110506	0.571708
ENSG00000234917	16.8866	0.000307965	0.123336	0.992057	NA
ENSG00000065978	5043.13	-0.323093	0.160438	0.00403814	0.112742
ENSG00000117385	624.863	-0.318562	0.194593	0.00728541	0.155072
ENSG00000164008	30.3137	0.0227626	0.124197	0.483597	0.887176
ENSG00000228452	16.3613	0.00545444	0.123125	0.836231	NA
ENSG00000274386	23.8278	0.0365553	0.130811	0.163773	NA
ENSG00000177868	52.8448	-0.0403012	0.126622	0.335383	0.812695
ENSG00000164010	92.0342	-0.024042	0.117333	0.61288	0.928891
ENSG00000228192	21.7388	-0.0135129	0.122888	0.653365	NA
ENSG00000164011	178.322	-0.00751545	0.113162	0.878526	0.980975
ENSG00000117394	10886.6	-0.503845	0.199454	0.000544022	0.0361227
ENSG00000227533	93.1759	-0.130999	0.211972	0.0354948	0.362797
ENSG00000117395	550.077	-0.0026164	0.115088	0.952322	0.99237
ENSG00000243710	88.0261	0.0189126	0.118357	0.669203	0.942074
ENSG00000179178	543.614	-0.116314	0.134427	0.120114	0.5867
ENSG00000253313	116.387	0.0609685	0.128361	0.27093	0.766488
ENSG00000066056	14.1985	-0.00744143	0.124037	0.73886	NA
ENSG00000117400	22.6343	0.020011	0.125396	0.435425	NA
ENSG00000234694	48.5537	-0.0479972	0.131826	0.221501	0.723444
ENSG00000117399	2898.62	-0.256046	0.212064	0.0179311	0.259887
ENSG00000066322	2652.28	-0.136938	0.161648	0.0820094	0.509908
ENSG00000159479	388.849	-0.0246999	0.102379	0.685812	0.944796
ENSG00000229431	45.95	0.01437	0.119437	0.724698	0.953788
ENSG00000198198	4363.31	0.0951847	0.115137	0.245089	0.746261
ENSG00000229372	14.2653	0.0134145	0.123977	0.608517	NA
ENSG00000178922	314.063	0.111628	0.146348	0.118775	0.585912
ENSG00000142949	20236.5	-0.306789	0.155618	0.00439742	0.118744
ENSG00000066135	1272.49	0.0210764	0.0967543	0.737349	0.956268
ENSG00000236200	99.2083	-0.0722224	0.136354	0.192784	0.689877
ENSG00000126091	286.855	0.0662922	0.125038	0.274293	0.769889
ENSG00000229444	15.1745	-0.0335284	0.129468	0.20297	NA
ENSG00000283414	8.22969	-0.00452779	0.12467	0.793796	NA
ENSG00000224751	27.7669	0.0124854	0.122821	0.679099	NA
ENSG00000117407	680.848	-0.0925648	0.140549	0.154121	0.641427
ENSG00000237950	22.6257	-0.00779798	0.12252	0.786896	NA
ENSG00000117408	823.77	0.0821204	0.118592	0.228541	0.731851
ENSG00000132768	488.336	0.0576844	0.112365	0.367025	0.833706
ENSG00000117410	1000.19	-0.0144187	0.108173	0.795908	0.965226
ENSG00000117411	1160.1	-0.114013	0.128064	0.126202	0.596558
ENSG00000159214	585.314	0.0709759	0.11185	0.283698	0.776206
ENSG00000196517	904.758	0.0808971	0.136454	0.191546	0.688784
ENSG00000178028	1149.46	-0.0319341	0.0990764	0.612479	0.928891
ENSG00000117419	678.809	-0.0741044	0.110391	0.273754	0.769889
ENSG00000233602	83.8534	-0.0196402	0.11675	0.672418	0.942074
ENSG00000187147	929.439	-0.00567898	0.098089	0.928958	0.990424
ENSG00000126106	167.083	-0.0268203	0.110411	0.632126	0.934267
ENSG00000198520	22.7181	0.0138821	0.123189	0.639841	NA
ENSG00000199377	14.2595	0.00965504	0.123966	0.687115	NA
ENSG00000142945	2174.76	-0.509044	0.15942	8.47242e-05	0.00936439
ENSG00000225721	64.7722	-0.0829165	0.153786	0.0904464	0.53066
ENSG00000142937	3549.66	-0.0600995	0.100584	0.365258	0.832346
ENSG00000200913	105.787	0.00909101	0.116217	0.841698	0.973254
ENSG00000234093	32.4754	-0.0355486	0.127332	0.317758	0.801351
ENSG00000142959	10.1533	0.0072622	0.124215	0.736979	NA
ENSG00000173846	315.836	0.132374	0.218515	0.0302269	0.335148
ENSG00000188396	15.9174	0.0551877	0.141256	0.0410921	NA
ENSG00000222009	53.1631	0.134263	0.249421	0.0080485	0.164435
ENSG00000117425	51.6176	0.0516791	0.133764	0.196242	0.694634
ENSG00000070785	267.75	0.00432956	0.111569	0.935325	0.991439
ENSG00000126107	580.843	0.186732	0.164449	0.0392989	0.378736
ENSG00000126088	335.236	-0.086768	0.131734	0.18729	0.68344
ENSG00000281912	19.2665	-0.0237576	0.125055	0.433346	NA
ENSG00000186603	64.6702	-0.127763	0.212786	0.0292659	0.331034
ENSG00000132781	256.014	-0.0363485	0.112574	0.525989	0.900757
ENSG00000132773	322.753	0.0270499	0.108971	0.641402	0.936017
ENSG00000070759	234.879	0.0130904	0.114037	0.793297	0.965226
ENSG00000280670	46.425	-0.0295516	0.122906	0.466663	0.883007
ENSG00000132763	383.035	-0.0459874	0.1108	0.448043	0.877086
ENSG00000117450	3298.83	-0.531283	0.164763	7.19438e-05	0.0081444
ENSG00000117448	797.102	-0.0530187	0.106633	0.405775	0.856048
ENSG00000132780	1687.13	-0.0383215	0.102966	0.540859	0.904681
ENSG00000159588	126.472	0.201341	0.301102	0.0257832	0.314255
ENSG00000159592	2673.05	-0.0336166	0.104453	0.583219	0.919934
ENSG00000225447	65.7757	0.0933097	0.164628	0.0673581	0.471619
ENSG00000234329	85.9017	0.0241405	0.116862	0.620418	0.931957
ENSG00000159596	486.355	-0.0976962	0.128381	0.167609	0.659587
ENSG00000197429	161.473	-0.0969511	0.142643	0.145806	0.628598
ENSG00000230896	23.6599	-0.0385179	0.129359	0.252031	NA
ENSG00000086015	3158.45	-0.0620584	0.100594	0.353448	0.8256
ENSG00000232467	11.0276	0.0111543	0.12469	0.599873	NA
ENSG00000117461	120.79	0.0941704	0.148382	0.133685	0.609669
ENSG00000117472	3694.83	-0.453707	0.191431	0.00100643	0.0510682
ENSG00000085998	1964.17	-0.0542568	0.105783	0.403178	0.854324
ENSG00000171357	38.5172	-0.0845679	0.16194	0.0422111	0.390003
ENSG00000085999	1145.13	-0.0286049	0.105418	0.597872	0.924844
ENSG00000132128	1575.16	0.0162344	0.0928935	0.799347	0.966297
ENSG00000173660	646.404	-0.116416	0.132402	0.120051	0.5867
ENSG00000117481	864.748	0.0516025	0.102301	0.428458	0.867495
ENSG00000225779	18.0689	6.28653e-05	0.122969	0.999796	NA
ENSG00000117480	362.313	0.0477588	0.11367	0.428605	0.867595
ENSG00000232022	8.67363	0.0241694	0.128082	0.16274	NA
ENSG00000197587	111.745	0.0142011	0.117306	0.751417	0.95796
ENSG00000269956	71.7678	0.0120634	0.118298	0.775739	0.962594
ENSG00000079277	1370.81	-0.0804479	0.109531	0.246458	0.747269
ENSG00000142961	1149.02	-0.04986	0.105119	0.442363	0.875267
ENSG00000123472	501.073	-0.0400795	0.105792	0.51785	0.898755
ENSG00000233647	11.0467	0.0081469	0.124233	0.709948	NA
ENSG00000186118	19.9448	-0.00945807	0.122671	0.743666	NA
ENSG00000228237	30.4269	0.0131721	0.121361	0.702769	0.949638
ENSG00000159658	1834.74	-0.143961	0.130816	0.0717934	0.482521
ENSG00000186377	38.7943	-0.013058	0.120062	0.731299	0.956037
ENSG00000225506	12.8405	-0.0213057	0.125806	0.394574	NA
ENSG00000162365	18.5369	0.0117488	0.123559	0.662783	NA
ENSG00000123473	1399.18	-0.068164	0.119542	0.286208	0.777141
ENSG00000162368	690.274	-0.00468657	0.105863	0.929083	0.990447
ENSG00000225762	21.4288	0.0232593	0.125442	0.417909	NA
ENSG00000237424	46.5529	-0.0333817	0.125148	0.388005	0.846872
ENSG00000186564	32.3771	-0.019853	0.122082	0.583549	0.919934
ENSG00000132122	9.24963	0.000572179	0.124864	0.972842	NA
ENSG00000142700	183.14	0.123101	0.162693	0.0911325	0.531774
ENSG00000185104	870.754	0.0259598	0.0981456	0.680192	0.942756
ENSG00000225767	57.4667	0.0152544	0.121068	0.679106	0.942756
ENSG00000230585	72.4874	0.0188811	0.119776	0.649198	0.936646
ENSG00000237130	15.9916	0.0216515	0.125436	0.423851	NA
ENSG00000123080	92.915	-0.178153	0.272101	0.0291336	0.330444
ENSG00000123091	938.964	0.00195458	0.098438	0.975898	0.99615
ENSG00000233406	32.3247	0.108213	0.192736	0.0194818	0.272118
ENSG00000236434	19.0692	-0.0153964	0.123583	0.592309	NA
ENSG00000085831	274.494	0.0166394	0.105915	0.774407	0.962585
ENSG00000085832	1804.52	-0.10883	0.125264	0.138531	0.6168
ENSG00000232027	44.23	-0.0127286	0.119666	0.743578	0.956488
ENSG00000206595	10.6537	-0.0509901	0.139497	0.0270073	NA
ENSG00000238140	16.9011	-0.00511814	0.122978	0.844717	NA
ENSG00000227070	34.5902	0.0844252	0.159599	0.0571579	0.441269
ENSG00000227742	13.5156	0.0390783	0.132445	0.108174	NA
ENSG00000117859	2285.68	-0.053083	0.102199	0.413033	0.859624
ENSG00000236973	18.7449	0.00502602	0.122936	0.853991	NA
ENSG00000232846	21.6327	0.001587	0.12228	0.957722	NA
ENSG00000212624	9.91842	-0.0185149	0.125894	0.389931	NA
ENSG00000078618	2060.53	-0.0125707	0.0961111	0.839274	0.973182
ENSG00000266993	43.2154	-0.0163483	0.12062	0.667849	0.941609
ENSG00000272175	7.39432	0.00881576	0.124995	0.619033	NA
ENSG00000230604	25.2782	-0.029127	0.126385	0.353357	NA
ENSG00000169213	777.809	-0.00239187	0.107919	0.963925	0.993367
ENSG00000117862	1132.21	-0.402771	0.175313	0.00139729	0.0649213
ENSG00000198841	115.206	0.0137103	0.113356	0.787361	0.964627
ENSG00000223390	17.1537	0.0434706	0.133649	0.122617	NA
ENSG00000228369	34.4208	0.0693484	0.150604	0.0365725	0.367273
ENSG00000134717	760.738	-0.0925328	0.125656	0.184177	0.679259
ENSG00000157077	715.845	0.0347793	0.10033	0.581487	0.919934
ENSG00000228407	10.5917	0.0270959	0.128275	0.205912	NA
ENSG00000223429	21.9794	-0.00983996	0.123173	0.718054	NA
ENSG00000224255	11.5516	0.0370238	0.132559	0.0545884	NA
ENSG00000237663	10.414	-0.00220931	0.123958	0.915207	NA
ENSG00000154222	1287.55	0.0599276	0.107413	0.363525	0.832346
ENSG00000272100	30.4211	-0.00783329	0.120617	0.822588	0.96935
ENSG00000085840	571.28	-0.0733458	0.117171	0.268631	0.765579
ENSG00000134748	800.352	0.0160404	0.0975922	0.796025	0.965226
ENSG00000134744	2190.39	-0.0566527	0.105451	0.384828	0.84568
ENSG00000116157	76.8648	-0.0502801	0.126496	0.313066	0.798419
ENSG00000162377	261.918	0.0816793	0.135339	0.191187	0.688143
ENSG00000162378	716.311	-0.0272168	0.104745	0.651595	0.936759
ENSG00000203995	502.908	0.0175363	0.0989206	0.778598	0.962762
ENSG00000242391	14.8245	-0.0520297	0.139332	0.0470339	NA
ENSG00000121310	1647.33	0.0387882	0.109148	0.524112	0.90055
ENSG00000230953	105.314	0.0522325	0.128175	0.290553	0.78058
ENSG00000116171	745.163	-0.104061	0.142255	0.13606	0.613508
ENSG00000236360	16.4206	-0.00258514	0.122616	0.923571	NA
ENSG00000226147	20.9733	-0.00323606	0.123002	0.899255	NA
ENSG00000174348	15.321	0.0235449	0.126618	0.331586	NA
ENSG00000157184	426.469	-0.069788	0.113639	0.290521	0.78058
ENSG00000236723	8.59001	0.0047867	0.124566	0.796265	NA
ENSG00000162384	441.398	-0.216099	0.257642	0.0274478	0.324282
ENSG00000259818	10.198	0.00126315	0.123916	0.955103	NA
ENSG00000162385	220.721	-0.047335	0.120417	0.384632	0.84568
ENSG00000226754	15.1724	-0.027427	0.128137	0.222537	NA
ENSG00000157193	2422.42	-0.0461372	0.124296	0.352525	0.825066
ENSG00000234578	12.5648	-0.00547166	0.123598	0.816634	NA
ENSG00000228838	81.3883	0.025801	0.12096	0.543399	0.906004
ENSG00000225030	26.3463	0.0222569	0.12445	0.475022	NA
ENSG00000232762	110.914	0.0269463	0.122152	0.506111	0.896699
ENSG00000225675	23.2225	-0.0581796	0.141065	0.0831286	NA
ENSG00000058804	1761.42	-0.193455	0.226603	0.0344339	0.358731
ENSG00000058799	351.742	-0.0572974	0.110082	0.367123	0.833706
ENSG00000211452	44.7142	-0.00821503	0.119426	0.829273	0.970817
ENSG00000081870	366.23	-0.164153	0.189408	0.0522294	0.424782
ENSG00000116212	417.482	-0.059761	0.124072	0.296989	0.783846
ENSG00000116209	1862.35	-0.224686	0.167805	0.0215742	0.286224
ENSG00000280378	24.4376	-0.0142053	0.122422	0.657636	NA
ENSG00000116205	242.381	-0.0530333	0.124535	0.32546	0.80712
ENSG00000280425	8.16948	-0.0202573	0.127314	0.190128	NA
ENSG00000215883	392.346	-0.0399287	0.107162	0.515888	0.898243
ENSG00000116221	938.084	-0.0673462	0.108619	0.311667	0.797335
ENSG00000157216	358.804	0.0715734	0.125807	0.253695	0.750806
ENSG00000198711	36.027	0.00117378	0.12026	0.975328	0.99615
ENSG00000162390	792.163	0.0261447	0.112411	0.63355	0.934697
ENSG00000162391	64.8369	-0.07096	0.145173	0.115491	0.579736
ENSG00000230728	9.36095	-0.0245108	0.128289	0.141896	NA
ENSG00000184313	12.1959	0.00695008	0.124732	0.705745	NA
ENSG00000243725	155.747	-0.0062397	0.113891	0.896238	0.984882
ENSG00000162396	136.699	0.0446852	0.123016	0.37797	0.841028
ENSG00000006555	638.518	-0.0560133	0.115024	0.360431	0.829952
ENSG00000237453	24.2863	0.0200005	0.123539	0.536391	NA
ENSG00000162398	15.3167	0.0167158	0.124439	0.530847	NA
ENSG00000116133	7009.69	-0.0556556	0.130187	0.259118	0.757399
ENSG00000242396	8.49755	0.00563891	0.12446	0.771768	NA
ENSG00000143001	43.8444	-0.0915485	0.170678	0.0285181	0.328924
ENSG00000169174	1874.15	-0.147236	0.221073	0.0420263	0.389567
ENSG00000162402	3604.54	-0.00281192	0.0909702	0.958235	0.992822
ENSG00000162407	392.554	-0.0981269	0.138716	0.151359	0.637803
ENSG00000162409	49.9908	-0.0087717	0.119472	0.817905	0.969196
ENSG00000162600	330.114	-0.135021	0.179531	0.0701752	0.478576
ENSG00000184292	10183.7	-0.299719	0.147213	0.0039905	0.112359
ENSG00000185839	29.7515	0.0305474	0.12639	0.354725	NA
ENSG00000162601	1510.64	0.119659	0.129363	0.111858	0.573809
ENSG00000283445	21.2861	0.0261553	0.126808	0.325477	NA
ENSG00000177606	947.807	0.0560604	0.140801	0.0663485	0.469137
ENSG00000232453	20.9528	-0.0193112	0.123816	0.530131	NA
ENSG00000237352	39.0483	-0.0204782	0.121886	0.580328	0.919748
ENSG00000228121	7.33944	0.0400797	0.134188	0.0293087	NA
ENSG00000172456	165.125	0.0448912	0.117222	0.428337	0.867495
ENSG00000134709	574.123	-0.0200323	0.10459	0.734925	0.956214
ENSG00000134716	96.6634	0.0205662	0.11484	0.6827	0.943364
ENSG00000162599	735.865	-0.00791343	0.100225	0.894974	0.984367
ENSG00000270742	34.8608	0.0272197	0.125019	0.420129	0.862911
ENSG00000237853	26.7018	-0.0082554	0.121255	0.799301	NA
ENSG00000162604	506.959	-0.0200775	0.101651	0.740332	0.956268
ENSG00000132849	3821.72	-0.00125865	0.0929328	0.981491	0.99679
ENSG00000236646	14.4929	-0.0156071	0.124509	0.536573	NA
ENSG00000132854	87.2306	0.0377929	0.129114	0.259121	0.757399
ENSG00000162607	549.593	-0.0369525	0.109538	0.526969	0.901008
ENSG00000116641	1438.07	-0.0204074	0.0937872	0.745751	0.956994
ENSG00000132855	50.5079	0.0684842	0.143723	0.120777	0.588002
ENSG00000278967	19.4468	0.0431047	0.133189	0.137406	NA
ENSG00000213703	11.7095	0.00271622	0.123517	0.91036	NA
ENSG00000235545	13.7896	0.00511184	0.123382	0.838232	NA
ENSG00000125703	125.034	-0.0183583	0.11715	0.688699	0.945414
ENSG00000088035	298.69	-0.368081	0.218897	0.00529255	0.130989
ENSG00000142856	437.925	-0.0500059	0.113307	0.397321	0.852115
ENSG00000203965	163.666	0.0199338	0.1097	0.721965	0.952927
ENSG00000116652	44.0692	-0.0516215	0.131617	0.23667	0.739962
ENSG00000079739	794.168	-0.131398	0.137503	0.0921042	0.533353
ENSG00000244256	17.5199	-0.00337381	0.123148	0.892258	NA
ENSG00000185483	169.922	0.0235789	0.120481	0.576897	0.919281
ENSG00000228056	9.98893	0.0183541	0.126018	0.376072	NA
ENSG00000223949	7.86043	-0.0121699	0.12554	0.467153	NA
ENSG00000177414	18.0076	-0.00520558	0.122911	0.844176	NA
ENSG00000158966	891.401	-0.0758165	0.127658	0.230915	0.733766
ENSG00000162437	739.273	-0.179298	0.173468	0.0440458	0.397368
ENSG00000162434	1912.38	0.126287	0.138491	0.102581	0.55545
ENSG00000233877	20.1336	0.00321815	0.122635	0.909269	NA
ENSG00000226891	54.2665	-0.0811644	0.154067	0.081784	0.509575
ENSG00000185031	16.024	0.0146751	0.123695	0.601968	NA
ENSG00000272506	10.7273	0.00277466	0.124414	0.884676	NA
ENSG00000212257	7.94957	-0.0299861	0.130006	0.0847575	NA
ENSG00000265996	12.6623	5.33839e-05	0.124147	0.999713	NA
ENSG00000162433	697.881	-0.348859	0.193057	0.00468316	0.123035
ENSG00000231622	15.3645	-0.0304352	0.127866	0.275534	NA
ENSG00000116675	150.573	-0.00720355	0.110242	0.889903	0.983393
ENSG00000213625	812.176	-0.0759039	0.122983	0.243417	0.745428
ENSG00000116678	136.815	-0.144022	0.207563	0.0486344	0.412388
ENSG00000224570	13.9583	-0.00366926	0.123064	0.88537	NA
ENSG00000184588	19.0453	-0.012523	0.124358	0.5963	NA
ENSG00000152763	20.31	0.0233435	0.125307	0.424382	NA
ENSG00000198160	828.88	0.0539175	0.107721	0.403904	0.854658
ENSG00000116704	486.646	-0.0270589	0.105263	0.654372	0.937449
ENSG00000081985	41.0458	0.0312334	0.125211	0.396669	0.851876
ENSG00000142864	2751.86	-0.146151	0.142984	0.0721741	0.483743
ENSG00000223263	45.6675	-0.00433319	0.12032	0.90051	0.98582
ENSG00000116717	564.75	1.06657	0.257733	1.57295e-06	0.000363514
ENSG00000172380	1547.65	-0.0858528	0.123162	0.207795	0.709546
ENSG00000238778	21.4973	-0.0186054	0.12348	0.552613	NA
ENSG00000232284	74.55	0.00184616	0.116194	0.968598	0.994458
ENSG00000116729	1107.75	-0.151283	0.137545	0.0654875	0.467259
ENSG00000234383	50.198	0.0368766	0.125483	0.377141	0.84048
ENSG00000116745	166.382	0.0117012	0.119777	0.763723	0.960158
ENSG00000024526	1339.7	-0.440041	0.217927	0.00224877	0.0840066
ENSG00000233589	93.911	-0.670825	0.368128	0.00217363	0.0822974
ENSG00000033122	46.0156	0.0216787	0.120408	0.600404	0.925303
ENSG00000066557	301.069	-0.0295232	0.111102	0.600524	0.925303
ENSG00000116754	4958.09	-0.150176	0.134037	0.0655748	0.467259
ENSG00000228988	9.45466	-0.0221378	0.126622	0.31998	NA
ENSG00000118454	560.05	-0.0315858	0.100054	0.614193	0.928891
ENSG00000197568	156.099	-0.0261586	0.111967	0.636118	0.935582
ENSG00000226088	26.8082	0.0154166	0.122742	0.629398	NA
ENSG00000116761	423.43	0.417268	0.199034	0.00210221	0.0806223
ENSG00000235079	18.8218	-0.0198974	0.124643	0.482092	NA
ENSG00000132485	1465.28	-0.255279	0.159419	0.0122359	0.210533
ENSG00000225087	141.005	0.0279475	0.115683	0.588823	0.921557
ENSG00000227016	51.2354	-0.00326129	0.119537	0.928838	0.990424
ENSG00000233973	38.7297	1.34775	0.490519	0.000209862	0.0181555
ENSG00000162620	16.0674	-0.00718692	0.124277	0.73042	NA
ENSG00000254685	171.007	-0.0239896	0.110031	0.668642	0.942006
ENSG00000116791	408.327	-0.256431	0.237432	0.0190948	0.269891
ENSG00000162623	308.29	-0.0497791	0.113402	0.413004	0.859624
ENSG00000137968	149.368	-0.0192917	0.112116	0.724245	0.953788
ENSG00000117054	396.192	-0.0859615	0.134638	0.183856	0.67907
ENSG00000181227	128.751	-0.0797393	0.139332	0.177298	0.674667
ENSG00000137955	1279.62	0.0310691	0.106176	0.605503	0.926684
ENSG00000057468	39.3473	-0.00653868	0.121216	0.841941	0.973254
ENSG00000184005	25.1194	0.0230799	0.125588	0.407494	NA
ENSG00000142892	420.773	-0.16913	0.241187	0.0371514	0.370897
ENSG00000228187	12.3459	0.0344388	0.130204	0.168196	NA
ENSG00000154027	19.0692	0.0458097	0.135086	0.0983616	NA
ENSG00000036549	1116.45	0.0543151	0.103598	0.405274	0.8557
ENSG00000077254	1282.66	-0.0135531	0.101092	0.82069	0.969213
ENSG00000180488	465.92	-0.014197	0.0993962	0.818585	0.969196
ENSG00000235613	18.9501	0.0193049	0.124831	0.478528	NA
ENSG00000235927	22.7321	-0.0206273	0.124519	0.482058	NA
ENSG00000162614	151.479	0.0560821	0.126082	0.303323	0.788201
ENSG00000162613	2655.65	-0.0733065	0.107341	0.276047	0.770308
ENSG00000162616	337.196	-0.00941633	0.111206	0.856048	0.974927
ENSG00000137960	141.373	0.0315882	0.116919	0.542526	0.905141
ENSG00000273338	10.4529	-0.0112298	0.124546	0.606516	NA
ENSG00000137959	194.899	0.0937491	0.160879	0.0858722	0.518849
ENSG00000137965	340.959	0.0432906	0.115259	0.453562	0.878167
ENSG00000117114	196.337	-0.197269	0.304399	0.0247676	0.306383
ENSG00000231364	14.6702	1.36129	0.83131	0.00237743	NA
ENSG00000233008	19.8347	0.00726775	0.122729	0.798104	NA
ENSG00000137941	163.543	-1.62162e-05	0.116911	0.997716	0.999344
ENSG00000233061	16.0203	-0.0244706	0.126229	0.361196	NA
ENSG00000271576	41.4707	-0.0347353	0.127137	0.324146	0.805899
ENSG00000142875	344.112	-0.0781834	0.13024	0.216279	0.719247
ENSG00000213540	31.2866	-0.00138456	0.120621	0.966459	0.993653
ENSG00000203943	16.5544	-0.103248	0.19531	0.00237096	NA
ENSG00000117133	289.785	-0.0155746	0.107963	0.781253	0.963479
ENSG00000174021	773.067	-0.184046	0.161187	0.0389666	0.377674
ENSG00000122432	63.0164	0.0021198	0.116614	0.962969	0.99299
ENSG00000117151	346.667	-0.0989019	0.131531	0.158643	0.647313
ENSG00000117155	362.221	-0.0193146	0.109412	0.733218	0.956037
ENSG00000171517	1029.96	-0.178328	0.190982	0.0450121	0.400722
ENSG00000153898	30.4696	-0.0212291	0.124716	0.466055	0.883007
ENSG00000162643	19.3587	0.00234105	0.122362	0.936451	NA
ENSG00000055732	931.073	-0.0665027	0.11704	0.30152	0.787314
ENSG00000280099	65.5335	0.0468087	0.131661	0.223391	0.725569
ENSG00000097096	387.634	0.0785042	0.136962	0.183009	0.679035
ENSG00000162642	367.128	-0.0151425	0.101071	0.801689	0.966662
ENSG00000142867	371.459	0.0347664	0.111782	0.541085	0.904681
ENSG00000223653	25.7616	-0.0251631	0.126775	0.321763	NA
ENSG00000153904	437.8	-0.0285877	0.111983	0.605844	0.926684
ENSG00000282057	8.74528	-0.00312464	0.124512	0.86137	NA
ENSG00000142871	627.205	0.0941021	0.16263	0.0815247	0.509387
ENSG00000117174	454.375	0.0426023	0.106161	0.496096	0.89208
ENSG00000171502	24.0538	-0.0190128	0.123711	0.538449	NA
ENSG00000122417	671.906	0.0264961	0.108558	0.648569	0.936646
ENSG00000137975	636.893	-0.666356	0.198658	3.90216e-05	0.00514363
ENSG00000016602	65.7819	0.0134564	0.126178	0.319405	0.803253
ENSG00000261737	9.12172	-0.00323104	0.124028	0.876105	NA
ENSG00000097033	814.117	-0.000379183	0.102742	0.994929	0.999153
ENSG00000183291	1262.58	-0.569884	0.215347	0.000391933	0.0282366
ENSG00000153936	600.986	-0.186998	0.197342	0.039644	0.380304
ENSG00000267734	22.9579	0.0919599	0.174632	0.0136127	NA
ENSG00000143013	327.053	-0.0182334	0.11056	0.737041	0.956268
ENSG00000237505	18.8424	-0.00764605	0.122965	0.778486	NA
ENSG00000065243	1846.26	-0.0289339	0.0964162	0.64707	0.936295
ENSG00000207234	15.2243	-6.19342e-06	0.123013	0.997752	NA
ENSG00000241975	31.498	0.017424	0.122713	0.599563	0.925149
ENSG00000137947	198.416	0.063124	0.120961	0.306702	0.791786
ENSG00000137944	317.94	-0.0946899	0.142416	0.149379	0.634046
ENSG00000213516	453.564	-0.0289162	0.106473	0.627344	0.933098
ENSG00000117226	284.942	0.0594818	0.126013	0.292108	0.780891
ENSG00000117228	181.388	-0.0143386	0.113505	0.774865	0.962594
ENSG00000162645	112.57	0.0342089	0.131034	0.104129	0.558851
ENSG00000213512	27.4074	0.0108883	0.12355	0.681884	NA
ENSG00000162654	143.299	0.0307648	0.129982	0.112538	0.574122
ENSG00000154451	13.8221	2.53483	0.884121	0.00017279	NA
ENSG00000197147	641.278	0.057642	0.116029	0.355885	0.82743
ENSG00000231999	40.0898	0.04053	0.12851	0.288253	0.778843
ENSG00000230735	17.3686	0.0511515	0.13948	0.0309128	NA
ENSG00000171488	770.789	-0.0192142	0.114861	0.690474	0.946412
ENSG00000171492	2151.18	-0.171199	0.148282	0.0471092	0.405764
ENSG00000272672	16.7799	-0.0171832	0.124927	0.488959	NA
ENSG00000228175	38.7347	-0.00257413	0.120013	0.941373	0.991769
ENSG00000162664	687.578	0.0401323	0.101283	0.527545	0.901273
ENSG00000233593	31.7126	-0.0143489	0.122523	0.652115	0.936793
ENSG00000122482	1016.12	0.0703214	0.112188	0.292768	0.781574
ENSG00000097046	522.856	-0.203818	0.176142	0.0310814	0.341205
ENSG00000069702	1075.47	-0.78365	0.15081	1.08932e-08	4.84613e-06
ENSG00000172031	96.2858	-0.0170249	0.114547	0.729905	0.955856
ENSG00000189195	92.1273	0.00166134	0.116276	0.971922	0.994845
ENSG00000224678	15.9939	-0.0123715	0.123795	0.63516	NA
ENSG00000174842	194.225	-0.0540697	0.120308	0.351698	0.824625
ENSG00000122484	600.051	0.0937401	0.131184	0.171834	0.666183
ENSG00000162676	79.2398	0.0300333	0.118949	0.532789	0.902396
ENSG00000067208	632.282	0.0530098	0.108804	0.407168	0.856549
ENSG00000223787	13.0535	-0.0109621	0.124784	0.591463	NA
ENSG00000229992	39.0243	0.0400283	0.128665	0.282917	0.775879
ENSG00000225505	56.9679	0.03246	0.122845	0.449116	0.87777
ENSG00000223896	35.968	0.00947725	0.120893	0.787765	0.964627
ENSG00000122406	4401.15	-0.116556	0.116193	0.106633	0.56353
ENSG00000154511	223.87	-0.233827	0.273459	0.0236688	0.299139
ENSG00000207523	51.9543	-0.0301867	0.123288	0.452812	0.878167
ENSG00000229052	29.7985	0.000983307	0.121506	0.977828	NA
ENSG00000143033	595.128	0.0950769	0.122734	0.179351	0.67701
ENSG00000117500	1524.8	-0.13327	0.16089	0.0828627	0.511529
ENSG00000122483	458.679	0.0201002	0.105068	0.736584	0.956268
ENSG00000225297	17.6354	-0.0254355	0.126361	0.35228	NA
ENSG00000223745	360.83	-0.0152458	0.113412	0.762775	0.959753
ENSG00000117505	1071.53	0.0060232	0.103358	0.920188	0.988668
ENSG00000137942	869.631	0.043854	0.108471	0.479243	0.885579
ENSG00000137936	1501.66	0.00808554	0.122207	0.79448	0.965226
ENSG00000224093	268.99	0.0254015	0.12697	0.311291	0.797335
ENSG00000230439	75.0403	0.00767768	0.124815	0.675251	0.942432
ENSG00000067334	713.166	0.0260587	0.107148	0.63059	0.934142
ENSG00000023909	760.499	0.00270893	0.0963935	0.966391	0.993653
ENSG00000198691	21.199	-0.00270732	0.121952	0.92654	NA
ENSG00000137962	3060.84	0.0369315	0.111776	0.526008	0.900757
ENSG00000117528	769.172	-0.0987261	0.126645	0.164367	0.654927
ENSG00000117525	11054.3	-0.0110409	0.122347	0.716147	0.951418
ENSG00000224081	405.552	-0.0221211	0.110827	0.687582	0.945047
ENSG00000263526	13.9741	0.0448906	0.135997	0.043164	NA
ENSG00000143036	423.751	-0.0510323	0.111688	0.410876	0.859421
ENSG00000117519	1324.65	-0.0997956	0.153523	0.11542	0.579707
ENSG00000235501	25.4493	0.0106406	0.121984	0.741036	NA
ENSG00000172339	130.342	-0.0361629	0.116665	0.498407	0.892889
ENSG00000230427	10.496	0.00683446	0.124358	0.740736	NA
ENSG00000152078	115.031	-0.185618	0.261366	0.0320994	0.347173
ENSG00000271092	14.5433	-0.00954639	0.124502	0.650109	NA
ENSG00000122481	54.9324	-0.0541384	0.13135	0.243777	0.745428
ENSG00000228852	14.4704	0.0192629	0.125452	0.434151	NA
ENSG00000117569	694.535	0.0411945	0.104796	0.512781	0.897867
ENSG00000188641	577.019	0.0194901	0.107444	0.734299	0.956037
ENSG00000232878	19.7125	-0.0159578	0.12368	0.579531	NA
ENSG00000232542	12.6638	0.0180053	0.12592	0.388881	NA
ENSG00000228057	29.752	0.0158737	0.122263	0.638284	NA
ENSG00000226128	9.68665	-0.00283449	0.124004	0.891439	NA
ENSG00000235777	9.75795	0.0320616	0.130166	0.123549	NA
ENSG00000270911	19.9306	-0.0190596	0.12517	0.455219	NA
ENSG00000259946	30.9201	0.0112922	0.122011	0.727673	0.955145
ENSG00000225206	334.666	-0.0164332	0.111931	0.754327	0.95796
ENSG00000233557	34.0875	0.0335438	0.127714	0.301095	0.787029
ENSG00000226053	19.6246	0.00419491	0.123498	0.863442	NA
ENSG00000162627	162.737	-0.0165062	0.113361	0.745038	0.956631
ENSG00000099260	137.168	0.0353971	0.122868	0.431748	0.868831
ENSG00000156869	719.737	-0.50848	0.162879	0.000106833	0.0111828
ENSG00000162688	245.183	-0.0347052	0.112658	0.540473	0.904681
ENSG00000117620	740.518	-0.0427115	0.10522	0.487412	0.888554
ENSG00000156875	1386.87	-0.205196	0.155814	0.0289954	0.330444
ENSG00000156876	594.662	-0.0337691	0.106665	0.574325	0.91866
ENSG00000226952	21.2446	-0.00598522	0.122239	0.838116	NA
ENSG00000122435	264.106	0.0273292	0.114453	0.602601	0.926451
ENSG00000122477	23.5604	0.00772649	0.122411	0.795438	NA
ENSG00000137992	486.438	-0.0124909	0.102467	0.834002	0.972265
ENSG00000225169	10.5176	0.00366573	0.123695	0.874607	NA
ENSG00000230287	27.1821	0.0229968	0.124893	0.449329	NA
ENSG00000224616	13.2522	-0.00881438	0.124336	0.680189	NA
ENSG00000137996	512.034	0.0352323	0.105443	0.568316	0.917094
ENSG00000207750	9.59214	-0.0128046	0.125767	0.412959	NA
ENSG00000079335	82.1606	0.140195	0.238308	0.0226048	0.293187
ENSG00000162694	376.016	-0.0725949	0.136372	0.194461	0.691978
ENSG00000162695	1425.08	0.0629015	0.110255	0.337881	0.81609
ENSG00000230946	81.2578	-0.0225149	0.117666	0.626974	0.932905
ENSG00000117543	262.909	0.0125758	0.10619	0.832782	0.972066
ENSG00000235795	20.66	0.00434126	0.12325	0.865138	NA
ENSG00000233184	27.4541	0.0137202	0.121632	0.691463	NA
ENSG00000170989	156.916	0.0041869	0.123639	0.861991	0.977088
ENSG00000060718	182.57	-0.00359083	0.112583	0.941552	0.991769
ENSG00000222069	8.92913	0.00211497	0.124414	0.911807	NA
ENSG00000185946	478.325	-0.0375701	0.11355	0.508513	0.897176
ENSG00000215869	122.424	-0.0417943	0.124029	0.375761	0.83942
ENSG00000198890	103.387	0.0319386	0.120686	0.489543	0.888754
ENSG00000162631	68.7237	1.11783	0.320568	2.08611e-05	0.0029971
ENSG00000134215	90.781	-0.0387811	0.127911	0.302173	0.787699
ENSG00000085491	757.613	0.0333523	0.104859	0.583668	0.919934
ENSG00000241361	46.4585	-0.010833	0.121762	0.737992	0.956268
ENSG00000243967	14.989	0.0240811	0.126374	0.352525	NA
ENSG00000162636	290.394	-0.100673	0.16903	0.069004	0.475092
ENSG00000162639	80.6482	-0.0265981	0.117638	0.582046	0.919934
ENSG00000134186	1106.91	0.0494685	0.113834	0.416632	0.861355
ENSG00000116266	552.583	0.00548309	0.11081	0.918918	0.988495
ENSG00000228076	32.1086	0.0378796	0.128708	0.27463	0.769889
ENSG00000121957	1059.55	-0.210045	0.169156	0.0273183	0.324086
ENSG00000121940	744.882	-0.0544288	0.111814	0.374399	0.838381
ENSG00000085433	410.584	-0.00284265	0.103871	0.959341	0.992822
ENSG00000197780	101.544	0.0461026	0.122415	0.37997	0.842353
ENSG00000273382	10.6211	0.00429133	0.124115	0.839539	NA
ENSG00000215717	423.88	-0.0971553	0.136281	0.156492	0.644473
ENSG00000270066	11.9166	0.00150349	0.123496	0.951097	NA
ENSG00000251484	25.9985	-0.00940974	0.122679	0.744335	NA
ENSG00000116299	21.6219	0.0301434	0.127235	0.314661	NA
ENSG00000031698	1877.26	0.0798312	0.117244	0.240377	0.74244
ENSG00000143126	3752.98	-0.0430265	0.115607	0.452679	0.878167
ENSG00000134222	835.089	-0.349066	0.174968	0.00333347	0.102984
ENSG00000221986	58.0068	-0.00620872	0.121493	0.845035	0.973388
ENSG00000134243	1706.57	-0.136937	0.157614	0.081036	0.508195
ENSG00000143106	742.61	-0.0286013	0.107911	0.625241	0.932862
ENSG00000143028	8.45574	0.00828147	0.12507	0.623278	NA
ENSG00000162650	538.081	-0.0776033	0.119275	0.24516	0.746261
ENSG00000174151	334.888	-0.0838657	0.127905	0.204686	0.705313
ENSG00000181754	159.625	0.099581	0.146813	0.135322	0.612275
ENSG00000156097	33.799	0.00149529	0.11975	0.969216	0.994532
ENSG00000065135	1403.41	-0.0308223	0.0961056	0.65648	0.937974
ENSG00000116337	1476.66	-0.0371336	0.0989497	0.559263	0.912738
ENSG00000168765	371.834	-0.0480332	0.118196	0.399078	0.85223
ENSG00000213366	137.596	-0.0248241	0.12331	0.493926	0.89097
ENSG00000134202	429.941	-0.0998038	0.147867	0.131	0.604413
ENSG00000184371	1600.5	0.329985	0.165581	0.00371857	0.108277
ENSG00000168710	2395	-0.229782	0.165731	0.0208434	0.281631
ENSG00000143093	1509.34	0.0646993	0.105206	0.332862	0.811645
ENSG00000258634	403.958	0.0170742	0.110609	0.757249	0.958546
ENSG00000197106	10.2323	-0.00840652	0.124165	0.702886	NA
ENSG00000116396	1060.97	0.00677598	0.111727	0.895775	0.984776
ENSG00000227963	10.2121	-0.024615	0.127779	0.214689	NA
ENSG00000162775	1548.13	-0.115327	0.1184	0.122644	0.59013
ENSG00000224699	211.265	-0.020987	0.107275	0.71521	0.951418
ENSG00000168679	200.856	0.00989595	0.112747	0.84792	0.973878
ENSG00000273373	178.029	-0.0348467	0.114695	0.525584	0.900757
ENSG00000134248	295.475	-0.137981	0.160515	0.0791017	0.502899
ENSG00000261654	31.2767	0.0163389	0.121877	0.641598	0.936017
ENSG00000232811	37.862	0.0051697	0.119885	0.889909	0.983393
ENSG00000121931	413.569	-0.00895445	0.104203	0.876383	0.980696
ENSG00000273010	41.5276	-0.0224274	0.121463	0.567828	0.917094
ENSG00000156171	555.298	-0.102802	0.132412	0.149994	0.635207
ENSG00000134255	976.289	-0.0756649	0.118471	0.24939	0.747802
ENSG00000162777	488.884	-0.0806042	0.116121	0.235729	0.738782
ENSG00000064886	23.9007	-0.00677044	0.121933	0.824529	NA
ENSG00000085465	97.8399	0.0970842	0.167802	0.0645433	0.465197
ENSG00000260948	59.1528	0.0084205	0.119165	0.831909	0.971634
ENSG00000233337	37.3048	-0.0114159	0.12233	0.712772	0.951418
ENSG00000243960	31.4934	-0.0240906	0.124894	0.440026	0.874108
ENSG00000116455	543.825	-0.0108955	0.10862	0.842562	0.973254
ENSG00000199890	26.6599	-0.0182188	0.123806	0.542438	NA
ENSG00000116459	617.051	-0.11539	0.134474	0.121828	0.589733
ENSG00000143110	60.139	-0.0593087	0.136486	0.17694	0.674297
ENSG00000116473	471.394	-0.0816997	0.119861	0.228241	0.731851
ENSG00000215867	68.9027	0.0300844	0.121386	0.495966	0.891937
ENSG00000201028	13.8351	0.0333944	0.130009	0.165448	NA
ENSG00000197852	131.326	0.0438149	0.12282	0.385187	0.84568
ENSG00000064703	326.578	0.0559433	0.116641	0.362419	0.831453
ENSG00000143079	976.502	0.126236	0.134775	0.103527	0.557981
ENSG00000283296	17.6675	0.00609135	0.122661	0.829216	NA
ENSG00000134245	393.159	-0.0587007	0.121221	0.324545	0.806528
ENSG00000273483	10.3909	0.0101761	0.125026	0.583831	NA
ENSG00000007341	461.592	0.0110768	0.107153	0.844382	0.973388
ENSG00000116489	2864.91	-0.14263	0.152704	0.0736966	0.487159
ENSG00000235299	50.2779	0.073292	0.149282	0.0831924	0.511971
ENSG00000155363	5973.26	-0.0582856	0.100724	0.387896	0.846872
ENSG00000225075	47.2441	-0.00279895	0.117976	0.943976	0.991769
ENSG00000155366	1093.75	0.0212669	0.106992	0.791579	0.965226
ENSG00000155367	116.505	-0.0381283	0.119462	0.426552	0.866574
ENSG00000215866	68.5512	0.0179961	0.118882	0.675203	0.942432
ENSG00000224167	10.3369	-0.0118446	0.124541	0.595737	NA
ENSG00000155380	3742.42	-0.0451086	0.116093	0.432115	0.868831
ENSG00000229020	76.0379	0.411728	0.479036	0.00925463	0.17725
ENSG00000226419	552.766	-0.0184678	0.106048	0.750563	0.95796
ENSG00000238198	80.0966	0.0153681	0.116541	0.740619	0.956268
ENSG00000198799	1349.18	0.015936	0.0998109	0.796518	0.965226
ENSG00000081026	834.76	-0.0366377	0.102591	0.5558	0.911647
ENSG00000232499	10.3241	0.0183491	0.125928	0.386925	NA
ENSG00000116793	452.96	-0.00347158	0.110026	0.937335	0.991439
ENSG00000232450	46.4779	0.0511083	0.131067	0.247369	0.747535
ENSG00000081019	384.793	0.0538236	0.1106	0.394531	0.85059
ENSG00000226167	34.3317	-0.0352299	0.128124	0.286144	0.777141
ENSG00000134262	229.368	0.0487139	0.122767	0.360282	0.829932
ENSG00000118655	265.621	0.0501205	0.119416	0.380719	0.842858
ENSG00000235527	9.80129	-0.0189342	0.125986	0.383649	NA
ENSG00000163349	1464.05	0.162027	0.135702	0.0574002	0.442053
ENSG00000197323	1757.17	0.135476	0.130226	0.0865236	0.520321
ENSG00000226984	22.724	-0.0189289	0.124241	0.51178	NA
ENSG00000225650	40.9293	-0.0931809	0.167862	0.0491286	0.413441
ENSG00000116752	231.845	-0.030832	0.108121	0.601044	0.925543
ENSG00000175984	190.393	0.0277881	0.116612	0.581985	0.919934
ENSG00000213281	894.539	-0.0636154	0.114076	0.324216	0.805899
ENSG00000009307	4664.6	-0.164385	0.141288	0.0521054	0.424355
ENSG00000201900	30.1109	-0.0151558	0.123687	0.590435	0.921968
ENSG00000052723	595.219	-0.0514132	0.10763	0.419197	0.862506
ENSG00000134198	52.5613	0.0553273	0.133194	0.219063	0.721427
ENSG00000134259	48.6451	0.0205977	0.123951	0.511252	0.897867
ENSG00000173218	1813.89	-0.302688	0.176001	0.00701444	0.152408
ENSG00000163393	619.784	0.251879	0.188026	0.0169619	0.253006
ENSG00000237993	33.1294	0.043322	0.129974	0.253702	0.750806
ENSG00000173212	147.432	-0.0103507	0.119961	0.777475	0.962762
ENSG00000163399	17776	-0.319155	0.171256	0.00477487	0.123861
ENSG00000203865	138.329	-0.0124125	0.112539	0.807487	0.966885
ENSG00000224950	36.6567	-0.00522197	0.119872	0.885442	0.981877
ENSG00000116815	241.858	-0.081357	0.128486	0.212199	0.715756
ENSG00000177173	59.5121	-0.00996438	0.120294	0.784465	0.964424
ENSG00000143061	2542.7	-0.29966	0.142372	0.00355975	0.106285
ENSG00000134247	6346.47	-0.283027	0.23266	0.0126155	0.213803
ENSG00000134256	55.3345	-0.0138104	0.118501	0.73976	0.956268
ENSG00000236137	30.9319	0.009646	0.121728	0.770551	0.962387
ENSG00000116830	1608.44	-0.136864	0.127962	0.0818544	0.509742
ENSG00000134253	196.995	0.00927852	0.110303	0.863755	0.977505
ENSG00000198162	1755.45	-0.116266	0.132524	0.119341	0.586122
ENSG00000279513	14.3589	-0.00115741	0.123866	0.955205	NA
ENSG00000183508	63.0873	0.0179034	0.120053	0.6584	0.938908
ENSG00000196505	567.368	0.0396477	0.102846	0.52965	0.90199
ENSG00000065183	735.659	-0.167965	0.17219	0.0517018	0.423198
ENSG00000155761	24.441	-0.0122518	0.122944	0.675659	NA
ENSG00000092607	9.02751	0.011558	0.125148	0.540396	NA
ENSG00000116874	222.531	-0.013091	0.112438	0.797566	0.965839
ENSG00000224238	29.3193	-0.0102133	0.121134	0.765312	NA
ENSG00000236804	12.2161	0.00702701	0.124043	0.750342	NA
ENSG00000231365	271.413	0.0569028	0.114899	0.362531	0.831453
ENSG00000260941	9.89651	0.0141411	0.125245	0.491751	NA
ENSG00000198857	16.5023	0.0197148	0.124609	0.489415	NA
ENSG00000143067	286.075	1.03186	0.30173	2.57467e-05	0.00355164
ENSG00000092621	1880.29	-0.00156372	0.10515	0.976916	0.996295
ENSG00000261662	13.5034	0.0217608	0.126529	0.329693	NA
ENSG00000134250	8885.8	-0.0878635	0.117946	0.207738	0.709546
ENSG00000265808	858.589	-0.0614043	0.111967	0.309842	0.796006
ENSG00000223804	24.911	0.031209	0.126524	0.348723	NA
ENSG00000270392	147.583	-0.0393945	0.121812	0.420887	0.863124
ENSG00000270231	1481.47	-0.0177926	0.0949495	0.775669	0.962594
ENSG00000275131	544.246	0.0665888	0.131353	0.236564	0.739962
ENSG00000273136	176.309	-0.0888813	0.143583	0.152355	0.638289
ENSG00000226067	27.2507	0.00414587	0.120906	0.914249	NA
ENSG00000198019	9.89796	-0.0186878	0.126073	0.368273	NA
ENSG00000234998	21.8195	0.0168523	0.123471	0.579238	NA
ENSG00000223345	126.141	0.0797586	0.137646	0.183773	0.679035
ENSG00000227193	13.7489	-0.0262376	0.127214	0.291847	NA
ENSG00000213244	68.1677	0.00106264	0.115827	0.983844	0.997825
ENSG00000188610	165.878	-0.501977	0.452374	0.00648652	0.145558
ENSG00000171943	181.035	-0.0364865	0.111913	0.527484	0.901273
ENSG00000230806	13.4292	-0.0145925	0.124624	0.542822	NA
ENSG00000227082	8.54014	1.80241	1.15521	0.00288077	NA
ENSG00000231752	31.0709	0.0182581	0.122872	0.582893	0.919934
ENSG00000206737	22.1884	0.0177672	0.124805	0.494245	NA
ENSG00000240929	228.088	0.00187591	0.108659	0.980583	0.996645
ENSG00000273213	20.6431	-0.00663779	0.123191	0.79635	NA
ENSG00000230186	14.6766	-0.0384969	0.131821	0.133631	NA
ENSG00000263513	81.1194	-0.921922	0.352525	0.000322515	0.0250106
ENSG00000270872	23.6516	-0.0257611	0.125876	0.38287	NA
ENSG00000207205	27.5721	0.0230311	0.124786	0.452926	NA
ENSG00000266338	1057.09	0.0578882	0.103368	0.378192	0.841111
ENSG00000227212	84.0624	0.000807848	0.116272	0.987188	0.998255
ENSG00000224363	11.5098	-0.0358887	0.131467	0.106966	NA
ENSG00000196369	220.53	-0.0671088	0.124857	0.270815	0.766371
ENSG00000271644	9.08432	-0.00313614	0.124148	0.875823	NA
ENSG00000215784	67.8061	-0.0817232	0.157605	0.056434	0.438151
ENSG00000272419	309.241	0.0649954	0.114558	0.316369	0.800266
ENSG00000277678	34.2438	0.0105616	0.120693	0.769512	0.961968
ENSG00000281571	19.2286	0.0221653	0.125793	0.397209	NA
ENSG00000276216	45.7066	0.0021179	0.120003	0.95496	0.992698
ENSG00000162825	193.413	0.0241002	0.109383	0.673478	0.942074
ENSG00000234367	41.4091	0.00480683	0.119862	0.898831	0.985626
ENSG00000270722	694.003	-0.330289	0.437057	0.0124209	0.212301
ENSG00000272150	34.6143	0.0200128	0.123843	0.524525	0.90055
ENSG00000117262	234.091	-0.0601163	0.122733	0.308598	0.794029
ENSG00000174827	63.0846	0.053493	0.130586	0.256751	0.75444
ENSG00000117281	49.024	0.0800788	0.156032	0.0610188	0.454275
ENSG00000265491	437.111	0.0820317	0.118757	0.229639	0.732597
ENSG00000186141	476.559	0.0283728	0.109719	0.633411	0.934697
ENSG00000186364	80.4838	-0.00485248	0.117154	0.908269	0.986906
ENSG00000131788	1075.97	-0.00255728	0.101797	0.968768	0.994458
ENSG00000143127	20.8569	-0.0268012	0.12631	0.35584	NA
ENSG00000131779	134.707	-0.0557003	0.123077	0.325799	0.807239
ENSG00000265241	319.151	0.0262373	0.104106	0.663871	0.940872
ENSG00000211451	25.572	-0.0256275	0.125595	0.397581	NA
ENSG00000234222	16.8849	0.0544208	0.139953	0.063896	NA
ENSG00000271601	248.08	-0.432716	0.225088	0.002701	0.0927439
ENSG00000272031	44.8574	-0.0406519	0.126905	0.326454	0.807634
ENSG00000121851	50.1781	0.0216438	0.120089	0.607357	0.926714
ENSG00000265972	2465.03	1.59049	0.291821	2.29508e-09	1.07476e-06
ENSG00000201558	21.3078	-0.0214219	0.125339	0.427217	NA
ENSG00000233396	32.1061	0.0618819	0.14055	0.126353	0.596763
ENSG00000271425	429.561	0.0168589	0.100793	0.784763	0.964424
ENSG00000264343	268.185	0.0104457	0.110357	0.844341	0.973388
ENSG00000273768	23.2455	0.0381976	0.131493	0.14833	NA
ENSG00000276975	32.7103	-0.012243	0.122748	0.682678	0.943364
ENSG00000268043	636.962	0.160689	0.174765	0.0576793	0.442991
ENSG00000244371	44.1144	0.0195197	0.120925	0.618767	0.931553
ENSG00000227242	18.2164	0.0140442	0.123516	0.621282	NA
ENSG00000225603	19.3912	-0.0209139	0.125396	0.425537	NA
ENSG00000131791	1045.63	0.00161172	0.0994034	0.980279	0.996632
ENSG00000237188	55.7033	0.0191878	0.121935	0.596987	0.924576
ENSG00000131781	81.4168	0.141238	0.230998	0.0293393	0.331034
ENSG00000180867	62.4077	-0.0334535	0.123791	0.421973	0.863699
ENSG00000226015	20.037	0.0234299	0.126013	0.380182	NA
ENSG00000131778	1017.88	-0.0639185	0.117025	0.313927	0.798804
ENSG00000278811	142.975	-0.012962	0.114088	0.791385	0.965226
ENSG00000213226	8.82733	-0.00697104	0.124851	0.686049	NA
ENSG00000116128	473.516	0.0445791	0.108215	0.452116	0.878127
ENSG00000162836	702.477	-0.0332656	0.107122	0.579336	0.919491
ENSG00000188092	205.966	0.0319751	0.110621	0.580537	0.919839
ENSG00000215859	17.1446	0.00684848	0.122865	0.805267	NA
ENSG00000206585	42.3814	-0.00490943	0.120587	0.885489	0.981877
ENSG00000263956	684.759	0.151733	0.150241	0.0663892	0.469137
ENSG00000225080	28.4615	-0.00864282	0.122585	0.764981	NA
ENSG00000198658	31.3275	0.0764045	0.153787	0.0572647	0.44171
ENSG00000199879	10.9457	-0.00517868	0.123926	0.812875	NA
ENSG00000234283	9.92513	0.00213327	0.12436	0.912561	NA
ENSG00000228626	37.979	0.0154236	0.123087	0.61621	0.930181
ENSG00000231196	20.4248	0.0475204	0.135849	0.0946052	NA
ENSG00000238107	28.7702	0.0716863	0.152806	0.0308006	NA
ENSG00000224481	13.6669	-0.00356223	0.123257	0.884791	NA
ENSG00000202408	13.4623	0.0170477	0.12509	0.479744	NA
ENSG00000274020	179.59	0.297098	0.272812	0.0144984	0.231542
ENSG00000231551	140.417	0.586915	0.256715	0.000957877	0.0502815
ENSG00000225871	91.1341	0.106001	0.179084	0.0497179	0.414782
ENSG00000280649	62.3125	0.0738778	0.142825	0.150329	0.636022
ENSG00000274210	26.1699	0.0418121	0.13203	0.170974	NA
ENSG00000270629	892.428	0.0488262	0.101754	0.475049	0.88443
ENSG00000178104	1148.14	-0.0119064	0.104765	0.842143	0.973254
ENSG00000269713	986.136	0.0145099	0.104997	0.806007	0.966885
ENSG00000274265	53.5289	0.109402	0.184999	0.0420974	0.389686
ENSG00000215861	47.1438	0.0913654	0.164534	0.0592404	0.448017
ENSG00000271383	886.345	0.0556997	0.106178	0.393007	0.849635
ENSG00000277147	81.3586	0.0399106	0.127409	0.31839	0.801986
ENSG00000275557	19.2629	0.0305977	0.127491	0.301668	NA
ENSG00000150337	18.607	-0.0439848	0.135257	0.0569071	NA
ENSG00000203814	1003.3	-0.23002	0.228506	0.0268868	0.321831
ENSG00000233030	10.601	0.010269	0.124374	0.645567	NA
ENSG00000183598	312.767	-0.102104	0.148763	0.126511	0.597163
ENSG00000270882	19.9027	2.04677	0.775886	0.000283996	NA
ENSG00000220323	25.9405	-0.00419095	0.121274	0.895834	NA
ENSG00000261716	359.071	0.0109351	0.111251	0.837145	0.97291
ENSG00000203819	38.152	0.0181221	0.122009	0.611146	0.928527
ENSG00000184678	1444.58	-0.18796	0.191875	0.0396087	0.38017
ENSG00000184260	640.123	-0.104056	0.145417	0.132101	0.606427
ENSG00000184270	485.988	-0.0890304	0.137092	0.171923	0.666239
ENSG00000178096	91.7845	0.0169661	0.117131	0.711316	0.951418
ENSG00000159164	488.897	-0.0437768	0.109228	0.475222	0.884544
ENSG00000143368	1107.34	0.00690566	0.101811	0.909308	0.986906
ENSG00000014914	729.989	-0.035988	0.111531	0.533604	0.90261
ENSG00000264522	1052.48	0.0704789	0.113953	0.291616	0.780891
ENSG00000223945	15.8457	-0.0196841	0.125393	0.433876	NA
ENSG00000136631	403.828	-0.00114543	0.101962	0.9827	0.997355
ENSG00000023902	116.876	0.00554711	0.114117	0.910153	0.987153
ENSG00000143401	692.697	-0.0900453	0.135422	0.175345	0.672797
ENSG00000118298	87.9005	-0.0474998	0.123696	0.356081	0.82743
ENSG00000117362	2038.42	-0.162175	0.164366	0.0563461	0.43766
ENSG00000118292	20.1434	0.0168341	0.124288	0.53899	NA
ENSG00000159208	121.953	1.22255	0.340473	1.36853e-05	0.00217438
ENSG00000266472	398.593	-0.0148929	0.104317	0.799814	0.966297
ENSG00000278939	27.3654	-0.040768	0.130899	0.208008	NA
ENSG00000117360	1055.21	0.00552069	0.0974793	0.929989	0.990671
ENSG00000163125	1771.13	-0.00551414	0.098878	0.926924	0.990132
ENSG00000143374	631.493	-0.0669154	0.11311	0.306862	0.792082
ENSG00000143369	322.592	-0.142888	0.21508	0.0423921	0.390311
ENSG00000237781	41.2704	0.0246792	0.124112	0.470514	0.8833
ENSG00000143382	964.596	-0.0345197	0.114397	0.530214	0.902009
ENSG00000203804	174.922	0.000381628	0.116692	0.994944	0.999153
ENSG00000274963	21.22	0.0384215	0.13228	0.106456	NA
ENSG00000143384	2540.43	0.118014	0.1729	0.0784439	0.500685
ENSG00000253047	13.2168	0.000430947	0.123263	0.988013	NA
ENSG00000143420	1956.24	-0.0723331	0.108848	0.289236	0.779723
ENSG00000143457	413.719	-0.0889882	0.120774	0.200933	0.701649
ENSG00000163131	499.607	0.055051	0.116437	0.364149	0.832346
ENSG00000143387	71.5356	-0.00390919	0.115785	0.923149	0.989432
ENSG00000143437	1151.41	-0.0222141	0.106497	0.703248	0.949708
ENSG00000143379	1338.71	-0.0439846	0.0975563	0.493455	0.890391
ENSG00000143418	2720.39	-0.0559302	0.11545	0.365089	0.832346
ENSG00000231073	28.3641	0.025514	0.124095	0.465076	NA
ENSG00000143412	159.553	-0.0470549	0.124194	0.369861	0.835981
ENSG00000143409	340.306	-0.0104555	0.111729	0.842441	0.973254
ENSG00000143363	450.327	-0.0896712	0.141023	0.155875	0.643805
ENSG00000163141	70.1357	-0.00688834	0.119352	0.855817	0.974927
ENSG00000143443	103.003	-0.080911	0.142013	0.160964	0.650988
ENSG00000197622	1963.31	0.00124631	0.10378	0.983047	0.997455
ENSG00000213190	1112.21	-0.0644049	0.120425	0.304087	0.78932
ENSG00000143458	220.782	0.0468947	0.118479	0.404673	0.855144
ENSG00000143434	114.063	0.0404724	0.125837	0.353461	0.8256
ENSG00000163154	23.5069	0.026201	0.125238	0.415875	NA
ENSG00000163156	189.67	0.105946	0.149262	0.123776	0.591774
ENSG00000163155	137.144	0.00295639	0.109362	0.957126	0.992822
ENSG00000163159	510.622	-0.0572681	0.107836	0.377795	0.840882
ENSG00000143398	1984.03	0.0699432	0.10228	0.298147	0.784327
ENSG00000159352	1072.38	-0.0390576	0.110585	0.503638	0.895865
ENSG00000143373	1220.87	0.0773352	0.117507	0.250723	0.748154
ENSG00000143393	1415.45	0.0895592	0.11381	0.205387	0.706254
ENSG00000143390	641.061	-0.0228601	0.10094	0.709099	0.95054
ENSG00000159377	1376.17	-0.0600463	0.117956	0.30347	0.788336
ENSG00000143442	2842.48	0.0151927	0.0960554	0.80775	0.966885
ENSG00000238711	27.7387	-0.0624378	0.143552	0.0771564	NA
ENSG00000143375	478.146	0.12884	0.154896	0.0925594	0.534724
ENSG00000143367	590.57	0.352073	0.174704	0.00319331	0.101562
ENSG00000232536	26.8308	0.0284059	0.126494	0.350941	NA
ENSG00000207606	26.5715	-0.00700677	0.12308	0.790533	NA
ENSG00000223861	44.7721	-0.00629502	0.121403	0.84505	0.973388
ENSG00000250734	56.6668	0.00975856	0.117609	0.822498	0.96935
ENSG00000143376	1587.84	-0.112575	0.120764	0.129474	0.601562
ENSG00000143436	431.35	-0.0483138	0.111807	0.43068	0.868435
ENSG00000143450	24.0867	0.00835379	0.121574	0.798788	NA
ENSG00000182134	176.221	-0.0263865	0.114322	0.615305	0.929565
ENSG00000225556	14.0301	0.000595464	0.123328	0.982533	NA
ENSG00000159445	151.796	0.0428944	0.116566	0.447558	0.876939
ENSG00000197747	1083.95	-0.122501	0.159558	0.0938713	0.538678
ENSG00000229021	15.1637	0.0201174	0.125779	0.403499	NA
ENSG00000163191	1411.26	-0.104546	0.129629	0.14912	0.633897
ENSG00000159450	12.9732	-0.026807	0.127664	0.258834	NA
ENSG00000237975	10.4956	-0.0328526	0.130487	0.112398	NA
ENSG00000197915	31.7812	0.0637966	0.142797	0.103285	0.557521
ENSG00000143631	56.4667	-0.058682	0.137538	0.156738	0.644638
ENSG00000163207	22.384	0.00753295	0.123696	0.757878	NA
ENSG00000169469	12.3912	0.0226237	0.127838	0.15849	NA
ENSG00000163220	25.0859	1.04219	0.880766	0.00393629	NA
ENSG00000238279	62.6808	-0.0078951	0.119984	0.829263	0.970817
ENSG00000197956	1476.84	-0.294856	0.17214	0.00744999	0.157077
ENSG00000196154	47.3248	0.0120593	0.120506	0.746226	0.957284
ENSG00000188015	34.913	0.00777488	0.122716	0.786009	0.964627
ENSG00000196754	2001.39	-0.211627	0.244297	0.0291339	0.330444
ENSG00000188643	1769.73	-0.140041	0.171491	0.0738035	0.487165
ENSG00000189334	266.243	-0.0886696	0.143818	0.150076	0.635403
ENSG00000189171	207.152	0.0747384	0.13175	0.218425	0.72126
ENSG00000160678	35.816	0.052357	0.134881	0.174088	0.671011
ENSG00000272030	18.5492	0.0395325	0.131126	0.18598	NA
ENSG00000160679	1644.03	0.026034	0.0948261	0.680772	0.942756
ENSG00000143553	251.414	-0.0888886	0.132005	0.183989	0.67913
ENSG00000143621	1692.46	-0.107262	0.134694	0.139516	0.618057
ENSG00000169418	14.1307	-0.00826698	0.123688	0.7337	NA
ENSG00000143624	3055.24	0.0320743	0.0990732	0.612606	0.928891
ENSG00000233222	12.396	0.0226417	0.126112	0.371464	NA
ENSG00000143554	324.369	-0.0725862	0.121352	0.262732	0.759569
ENSG00000143614	1823.56	0.00434869	0.0937529	0.949415	0.992305
ENSG00000231827	13.3599	0.00110594	0.123537	0.964345	NA
ENSG00000223599	114.362	0.201448	0.309015	0.0247758	0.306383
ENSG00000236327	23.1422	-0.00709228	0.123721	0.76306	NA
ENSG00000198837	2191.54	0.0839596	0.111027	0.231607	0.734117
ENSG00000160741	1376.3	0.129389	0.126287	0.0954331	0.540589
ENSG00000143570	2561.39	-0.139351	0.134443	0.0810154	0.508195
ENSG00000273026	12.3111	-0.0134026	0.124921	0.534631	NA
ENSG00000143578	272.146	0.014513	0.111055	0.787687	0.964627
ENSG00000143543	820.732	-0.142008	0.160514	0.0750032	0.491234
ENSG00000272654	46.4606	0.00615725	0.120053	0.867831	0.978159
ENSG00000143545	285.841	0.0412496	0.111983	0.487673	0.888609
ENSG00000177954	1285.67	-0.00465173	0.0958531	0.944887	0.991769
ENSG00000143552	49.8795	0.0017609	0.117579	0.968023	0.994286
ENSG00000143549	3092.99	-0.127698	0.174901	0.0775894	0.498089
ENSG00000264384	29.9804	-0.000811085	0.122811	0.973448	NA
ENSG00000143612	1459.2	-0.104455	0.122255	0.151004	0.637305
ENSG00000143569	5553.62	-0.0189794	0.092978	0.737484	0.956268
ENSG00000143575	677.855	-0.0659817	0.10745	0.323876	0.805899
ENSG00000143515	848.179	-0.137187	0.145399	0.0835914	0.513465
ENSG00000228013	11.2289	-0.0141865	0.125327	0.476053	NA
ENSG00000160712	704.824	-0.689169	0.31059	0.000952225	0.0502741
ENSG00000228264	12.1953	-0.0400391	0.133637	0.0561448	NA
ENSG00000160714	741.678	0.0584707	0.11138	0.382736	0.844173
ENSG00000229780	31.867	0.0402327	0.128617	0.28468	0.776334
ENSG00000160716	46.8358	-0.012134	0.121064	0.729478	0.955856
ENSG00000160710	5747.06	-0.028916	0.0910208	0.643228	0.936017
ENSG00000163344	41.7479	-0.0348681	0.12495	0.388314	0.846872
ENSG00000163346	722.275	-0.0353406	0.116997	0.502369	0.894305
ENSG00000163348	825.754	-0.0856055	0.114346	0.218282	0.72126
ENSG00000160691	3364.27	-0.0837873	0.121292	0.20745	0.70951
ENSG00000173207	495.917	-0.153985	0.195247	0.0539934	0.430472
ENSG00000264349	14.8165	-0.00203316	0.123006	0.935449	NA
ENSG00000160688	524.176	0.0547115	0.109456	0.386083	0.846263
ENSG00000163352	12.7714	-0.00676983	0.123719	0.773263	NA
ENSG00000160685	905.062	0.0616513	0.109199	0.342416	0.818881
ENSG00000163354	54.3752	-0.0529672	0.133545	0.204971	0.705778
ENSG00000163357	50.6885	-0.0333293	0.122723	0.440964	0.874443
ENSG00000232093	30.7222	-0.0040876	0.120915	0.901475	0.98582
ENSG00000143537	6052.67	-0.0860901	0.139383	0.168092	0.660454
ENSG00000243364	290.98	-0.115323	0.154544	0.105332	0.561192
ENSG00000143590	288.191	-0.413964	0.262219	0.005094	0.128949
ENSG00000169242	420.526	-0.0301971	0.109978	0.599611	0.925149
ENSG00000169241	637.975	-0.104314	0.135939	0.143104	0.62232
ENSG00000179085	123.384	-0.00890845	0.115368	0.846897	0.973611
ENSG00000163463	316.394	-0.0358837	0.112927	0.528186	0.901416
ENSG00000163462	248.685	0.0279743	0.113496	0.605693	0.926684
ENSG00000185499	195.962	-0.0160068	0.118318	0.707758	0.950391
ENSG00000279487	15.3727	0.0175344	0.125597	0.428968	NA
ENSG00000231064	215.734	0.0776698	0.135459	0.19627	0.694634
ENSG00000169231	1078.28	0.0252159	0.115453	0.621866	0.932225
ENSG00000173171	253.727	-0.0246317	0.107867	0.670073	0.942074
ENSG00000160766	183.882	0.065195	0.123738	0.283885	0.776206
ENSG00000236675	62.4517	0.0241421	0.118349	0.602959	0.926451
ENSG00000177628	1138.49	-0.025401	0.101847	0.678196	0.942756
ENSG00000160767	1054.17	-0.27473	0.160763	0.00872523	0.170486
ENSG00000116521	1431.72	-0.0236946	0.10075	0.693715	0.947047
ENSG00000176444	2411.15	-0.0139489	0.0935442	0.822508	0.96935
ENSG00000143630	378.017	0.124648	0.145593	0.101978	0.554544
ENSG00000160752	814.135	0.00378292	0.112818	0.941739	0.991769
ENSG00000225855	360.84	0.0194885	0.102537	0.744544	0.956516
ENSG00000160753	1015.56	0.0734068	0.116153	0.26733	0.764585
ENSG00000116539	4021.06	0.135801	0.12819	0.0876478	0.522384
ENSG00000227773	14.5728	-0.0194988	0.125043	0.461137	NA
ENSG00000237872	51.6807	0.0268708	0.12358	0.472053	0.883657
ENSG00000235919	50.7791	-0.0121646	0.119156	0.759058	0.959046
ENSG00000271267	22.7263	-0.0169535	0.123549	0.570946	NA
ENSG00000125459	518.044	0.0191317	0.10287	0.75217	0.95796
ENSG00000246203	59.0222	-0.0276566	0.121074	0.520108	0.89959
ENSG00000163374	1516.28	0.137569	0.136831	0.0861033	0.519031
ENSG00000132676	1331.15	-0.0101081	0.106279	0.858184	0.97587
ENSG00000227673	6.92683	0.0106984	0.12558	0.474926	NA
ENSG00000203761	456.539	0.0140664	0.102041	0.816527	0.968914
ENSG00000116580	1925.32	-0.000900292	0.0916247	0.988221	0.998255
ENSG00000234937	55.5068	0.0733946	0.147996	0.0977275	0.544648
ENSG00000132718	18.8065	0.0253662	0.127339	0.277383	NA
ENSG00000143622	477.489	0.0455691	0.112162	0.451987	0.877972
ENSG00000132680	1541.25	0.000457447	0.0997025	0.997083	0.999344
ENSG00000207475	9.31744	-0.00691781	0.124647	0.710695	NA
ENSG00000173080	12.3477	-0.000656649	0.124073	0.972083	NA
ENSG00000116584	2687.26	0.308671	0.193209	0.00825786	0.167064
ENSG00000273002	83.5849	0.973002	0.309235	6.71781e-05	0.0078647
ENSG00000163479	2642.24	-0.0971447	0.13475	0.156254	0.644089
ENSG00000160803	1921.11	-0.00763543	0.096459	0.901977	0.98582
ENSG00000116586	104.883	-0.0159886	0.117689	0.716317	0.951418
ENSG00000132698	880.69	-0.0103981	0.0977178	0.861267	0.977017
ENSG00000254726	432.748	-0.0534244	0.113618	0.387721	0.846872
ENSG00000160789	5594.98	-0.234662	0.179864	0.0207725	0.280886
ENSG00000196189	521.049	-0.0707021	0.11955	0.274473	0.769889
ENSG00000160785	590.905	0.0814755	0.119818	0.225885	0.728903
ENSG00000160783	309.115	-0.0227044	0.108503	0.682655	0.943364
ENSG00000242252	31.1301	0.00522797	0.120674	0.882854	0.981772
ENSG00000160781	214.253	0.0209318	0.117129	0.657659	0.938785
ENSG00000198952	3829.83	-0.0240157	0.0930056	0.716868	0.951418
ENSG00000163472	299.279	0.0123158	0.108559	0.823841	0.969465
ENSG00000198715	713.976	-0.0411892	0.11257	0.479798	0.885776
ENSG00000163468	3596.38	-0.0727752	0.131503	0.225503	0.728741
ENSG00000163467	57.6367	-0.0165816	0.119692	0.680144	0.942756
ENSG00000132677	51.0291	0.00520822	0.12045	0.884138	0.981877
ENSG00000125462	517.065	-0.0029735	0.108579	0.951119	0.99237
ENSG00000116604	1023.63	0.0727414	0.106868	0.284998	0.776334
ENSG00000206651	7.64645	-0.0113998	0.125545	0.473426	NA
ENSG00000183856	4719.94	-0.116982	0.125909	0.120047	0.5867
ENSG00000163382	895.98	-0.119677	0.147086	0.107609	0.565808
ENSG00000160818	429.455	-0.038022	0.110564	0.519966	0.89959
ENSG00000280316	58.8858	-0.0302364	0.12177	0.484632	0.887526
ENSG00000132702	13.5087	0.0021662	0.123832	0.923865	NA
ENSG00000272068	20.0333	-0.0295809	0.127714	0.280987	NA
ENSG00000132692	438.402	-0.0438748	0.117203	0.436646	0.871187
ENSG00000272405	115.448	-0.104156	0.175945	0.0559559	0.437206
ENSG00000229953	93.5911	-0.017303	0.117461	0.700011	0.948575
ENSG00000132688	13.491	-0.0240614	0.127192	0.274613	NA
ENSG00000143320	55.624	0.0522118	0.133878	0.1953	0.692856
ENSG00000223356	11.8769	0.0146869	0.124765	0.532229	NA
ENSG00000143319	679.333	0.040937	0.106204	0.510686	0.897867
ENSG00000143303	641.67	-0.0322472	0.109255	0.581386	0.919934
ENSG00000143314	393.13	-0.124525	0.162276	0.0899464	0.529543
ENSG00000143321	4013.64	-0.0463583	0.105456	0.469476	0.883055
ENSG00000143294	1062.57	0.0616637	0.107644	0.351848	0.824702
ENSG00000027869	35.2561	0.00916838	0.120334	0.802326	0.966662
ENSG00000187800	1556.67	0.021632	0.107963	0.672047	0.942074
ENSG00000160838	48.3077	0.0173653	0.121594	0.633491	0.934697
ENSG00000132694	1857.68	0.0452345	0.0986799	0.491088	0.888977
ENSG00000117036	682.497	0.185403	0.180572	0.0413697	0.386139
ENSG00000235700	22.5559	0.032574	0.128709	0.244669	NA
ENSG00000183853	2389.73	-0.0489189	0.119659	0.379921	0.84235
ENSG00000226520	41.3788	-0.0101717	0.121983	0.747203	0.957412
ENSG00000158473	30.3831	-0.0244729	0.124121	0.469512	0.883055
ENSG00000163554	21.2049	0.00306326	0.121706	0.922964	NA
ENSG00000163565	1429.42	-0.00310227	0.0956397	0.959512	0.992822
ENSG00000163568	97.0593	0.0278798	0.121724	0.507964	0.896925
ENSG00000158716	80.9056	0.0394032	0.12274	0.409221	0.857927
ENSG00000158714	17.3773	-0.0183448	0.12502	0.47226	NA
ENSG00000188004	36.0087	-0.067524	0.144049	0.109168	0.569835
ENSG00000243284	24.3543	-0.00334518	0.121994	0.909207	NA
ENSG00000213085	24.4506	-0.0221605	0.12452	0.470109	NA
ENSG00000158710	2224.59	-0.237274	0.155916	0.0154051	0.241146
ENSG00000085552	798.789	-0.044214	0.107057	0.476045	0.884544
ENSG00000224259	315.831	-0.0175776	0.113607	0.728998	0.955688
ENSG00000273933	78.7174	0.0923837	0.161023	0.0808937	0.50812
ENSG00000177807	14.7947	0.0252402	0.126383	0.353749	NA
ENSG00000260766	22.2543	-0.0106645	0.122607	0.719744	NA
ENSG00000143315	264.563	0.00460886	0.112215	0.911113	0.987394
ENSG00000162728	21.8496	-0.00508176	0.122703	0.852347	NA
ENSG00000162729	1401.5	-0.173656	0.14864	0.0488619	0.412867
ENSG00000227741	78.3468	0.109705	0.173161	0.0728205	0.484483
ENSG00000162734	1561.93	0.029225	0.112304	0.599747	0.925149
ENSG00000132716	1292.1	-0.0118471	0.0940428	0.849492	0.973878
ENSG00000228606	50.9014	0.0208153	0.12102	0.599956	0.925149
ENSG00000162735	609.303	-0.0207744	0.100215	0.729266	0.955856
ENSG00000122218	4715.28	-0.0710131	0.101486	0.276847	0.770601
ENSG00000235082	31.5604	-0.0216781	0.122655	0.545212	0.907054
ENSG00000202078	25.6151	0.0144672	0.12356	0.613121	NA
ENSG00000162736	2553.87	-0.117664	0.11684	0.115387	0.579704
ENSG00000171786	15.9373	0.022979	0.125556	0.410977	NA
ENSG00000162738	1992.73	-0.163262	0.138175	0.050738	0.418971
ENSG00000158769	2790.73	-0.477142	0.155832	0.0001484	0.0143521
ENSG00000270149	20.9101	0.00647545	0.122136	0.831658	NA
ENSG00000232879	11.2296	0.00217268	0.124082	0.919597	NA
ENSG00000215845	125.448	-0.0151664	0.113893	0.76178	0.959404
ENSG00000158773	536.452	0.195192	0.168572	0.034846	0.359469
ENSG00000186517	113.704	0.0408699	0.121011	0.423082	0.864082
ENSG00000143217	446.415	-0.0183129	0.116544	0.694994	0.947047
ENSG00000228917	25.4137	-0.0210441	0.125987	0.380731	NA
ENSG00000162755	17.512	-0.0243634	0.126141	0.366567	NA
ENSG00000143256	140.575	0.0228187	0.117357	0.630771	0.934142
ENSG00000158793	634.177	-0.00953565	0.0992724	0.875001	0.980543
ENSG00000158796	560.944	0.088122	0.119106	0.210167	0.712084
ENSG00000143222	309.497	0.0350068	0.110386	0.551717	0.909187
ENSG00000143258	839.06	0.00878407	0.100188	0.89474	0.984367
ENSG00000143224	333.654	-0.0612172	0.124492	0.294164	0.782394
ENSG00000158850	1130.42	-0.0981696	0.131871	0.161462	0.651227
ENSG00000158859	13.1106	0.00982874	0.1236	0.702943	NA
ENSG00000158864	941.331	-0.0915969	0.124433	0.189565	0.685858
ENSG00000158882	144.273	0.00335275	0.111207	0.950068	0.992305
ENSG00000143257	19.8646	-0.0342497	0.128856	0.246344	NA
ENSG00000143252	1379.53	-0.307463	0.163835	0.00520761	0.130634
ENSG00000283696	10.9249	-0.0142271	0.125377	0.471666	NA
ENSG00000215840	13.6214	-0.0349157	0.13017	0.177085	NA
ENSG00000173110	19.6886	0.0312029	0.128822	0.218987	NA
ENSG00000162746	40.7021	0.0387635	0.12813	0.299484	0.786036
ENSG00000081721	134.793	-0.0304321	0.117417	0.543985	0.906471
ENSG00000118217	1653.99	-0.0657586	0.103941	0.326191	0.807634
ENSG00000229808	38.1093	0.0830324	0.159117	0.0530748	0.426386
ENSG00000198929	265.133	0.000944387	0.105793	0.988787	0.998437
ENSG00000239887	203.091	0.057777	0.117449	0.344711	0.82018
ENSG00000171722	37.9815	0.0981177	0.17579	0.0353191	0.361833
ENSG00000152332	1913.75	0.0033266	0.100255	0.966372	0.993653
ENSG00000117143	564.936	0.0703643	0.131416	0.229545	0.732597
ENSG00000272574	27.0445	-0.0173048	0.124071	0.540117	NA
ENSG00000162733	26.6902	0.0546579	0.13733	0.13407	NA
ENSG00000132196	533.844	-0.0384435	0.117244	0.474161	0.88427
ENSG00000117152	21.9955	-0.000154544	0.125325	0.983202	NA
ENSG00000232995	83.4116	0.01161	0.115313	0.807553	0.966885
ENSG00000143228	679.224	-0.43974	0.188166	0.00113221	0.0551034
ENSG00000185630	1137.45	-0.00116702	0.123391	0.952343	0.99237
ENSG00000207082	15.7642	-0.030991	0.128338	0.250806	NA
ENSG00000269887	27.9109	0.0407078	0.132377	0.142414	NA
ENSG00000276359	11.892	-0.0218125	0.127012	0.272918	NA
ENSG00000233693	45.8078	0.0230083	0.126074	0.376688	0.839743
ENSG00000271917	17.3689	0.00462536	0.123967	0.834513	NA
ENSG00000143198	519.034	-0.126878	0.139131	0.100514	0.551447
ENSG00000143149	444.912	-0.0593977	0.117995	0.335829	0.813515
ENSG00000230175	14.4801	0.011549	0.124287	0.623642	NA
ENSG00000225272	10.8614	0.00793778	0.124757	0.671744	NA
ENSG00000143183	879.952	-0.105451	0.137017	0.141082	0.619638
ENSG00000224358	17.5855	-0.0100502	0.123515	0.698545	NA
ENSG00000143179	871.501	-0.0469115	0.108113	0.45344	0.878167
ENSG00000236364	133.365	-0.0288311	0.115116	0.58023	0.919732
ENSG00000143157	1336.96	-0.028484	0.0992159	0.667086	0.941155
ENSG00000152382	255.401	-0.0154258	0.109674	0.77763	0.962762
ENSG00000225171	17.3242	-0.0100195	0.123892	0.679719	NA
ENSG00000272205	10.1907	-0.0100927	0.124485	0.638299	NA
ENSG00000143190	2175.56	0.0416386	0.100998	0.518665	0.899465
ENSG00000272033	52.8378	-0.0114817	0.119017	0.773988	0.962585
ENSG00000198821	13.4713	0.000330299	0.123242	0.99133	NA
ENSG00000143162	983.856	-0.34814	0.162111	0.00244769	0.0885299
ENSG00000198771	8.46198	-0.0185133	0.126441	0.314696	NA
ENSG00000197965	2461.27	-0.13099	0.14765	0.0914736	0.532104
ENSG00000143199	15.6802	1.08449	0.843842	0.00379777	NA
ENSG00000143158	95.4364	-0.00752745	0.11563	0.868414	0.978159
ENSG00000143164	1011.96	-0.0232891	0.102469	0.698442	0.948477
ENSG00000143147	380.961	-0.127279	0.157003	0.0911373	0.531774
ENSG00000143155	281.7	-0.00209246	0.104895	0.971796	0.994845
ENSG00000213064	2301.28	-0.0346917	0.0953656	0.586025	0.920799
ENSG00000206880	10.5619	0.015349	0.125165	0.487352	NA
ENSG00000143178	222.527	0.023738	0.110867	0.666391	0.941065
ENSG00000143153	771.067	-0.11837	0.171566	0.0804912	0.506706
ENSG00000143156	134.899	-0.0338741	0.119108	0.493433	0.890391
ENSG00000117475	288.147	0.0378883	0.118511	0.470207	0.883239
ENSG00000117477	11.6523	0.0118327	0.124832	0.572684	NA
ENSG00000117479	225.643	-0.0322934	0.115732	0.541702	0.904681
ENSG00000234604	11.3402	0.00366971	0.123769	0.872504	NA
ENSG00000213062	14.3914	-0.00870434	0.123411	0.735573	NA
ENSG00000198734	15.1209	0.00308007	0.124257	0.878966	NA
ENSG00000000460	474.359	0.0155937	0.102778	0.7864	0.964627
ENSG00000188404	14.3416	-0.0166425	0.125195	0.470276	NA
ENSG00000171806	68.4328	-0.116289	0.183934	0.0574377	0.442087
ENSG00000000457	327.09	0.0138494	0.104227	0.815487	0.968914
ENSG00000075945	227.415	-0.0139583	0.108638	0.800654	0.966466
ENSG00000120370	204.23	0.55051	0.244082	0.00109362	0.0538604
ENSG00000076258	16.1466	0.0254516	0.126992	0.309389	NA
ENSG00000117523	11104.6	-0.019448	0.0956945	0.748371	0.957663
ENSG00000117533	102.365	0.0308073	0.119849	0.511834	0.897867
ENSG00000010165	518.781	-0.0310966	0.105525	0.606693	0.926684
ENSG00000197959	41.0814	0.0232094	0.123678	0.498503	0.892889
ENSG00000230630	8.21449	0.00583245	0.124523	0.76026	NA
ENSG00000135845	244.295	-0.0881921	0.132783	0.183873	0.67907
ENSG00000094975	1542.27	0.0395074	0.101355	0.534914	0.90261
ENSG00000120337	67.2813	0.0303012	0.130677	0.0275929	0.325142
ENSG00000230849	31.3138	-0.00403408	0.121256	0.899314	0.985789
ENSG00000226375	8.4494	-0.0024411	0.124624	0.885287	NA
ENSG00000117586	34.0266	0.0232803	0.125609	0.408067	0.85672
ENSG00000231615	12.2288	0.00733914	0.123564	0.767761	NA
ENSG00000203739	96.5796	0.0514441	0.125201	0.326446	0.807634
ENSG00000117592	2401.64	-0.211417	0.185154	0.0282794	0.32848
ENSG00000076321	448.539	0.0670545	0.111939	0.311993	0.797804
ENSG00000120334	357.796	0.029357	0.106402	0.625466	0.932905
ENSG00000117593	1025.27	-0.105793	0.134561	0.141426	0.620139
ENSG00000270084	141.73	-0.0019337	0.1149	0.965188	0.993624
ENSG00000234741	4251.11	0.0357721	0.0993983	0.576011	0.91914
ENSG00000185278	765.024	0.00679755	0.105839	0.907359	0.986906
ENSG00000135870	1969.04	0.0866994	0.116591	0.214479	0.717273
ENSG00000236535	22.2341	0.0129565	0.123127	0.65821	NA
ENSG00000227373	15.6775	-0.000955648	0.123332	0.96658	NA
ENSG00000152061	1210.7	0.024911	0.106387	0.673341	0.942074
ENSG00000203737	39.8252	0.00687839	0.120782	0.844317	0.973388
ENSG00000223828	7.53401	0.0139984	0.125449	0.467044	NA
ENSG00000231378	15.8502	-0.0184542	0.124627	0.496394	NA
ENSG00000237249	26.3653	-0.0439156	0.133138	0.1504	NA
ENSG00000223525	26.8159	0.0537873	0.137907	0.112288	NA
ENSG00000235869	22.426	0.0279373	0.126901	0.32628	NA
ENSG00000229531	36.643	0.0316311	0.128291	0.261387	0.758981
ENSG00000252552	8.60771	0.00698144	0.12443	0.729135	NA
ENSG00000116161	1207.59	-0.141704	0.178243	0.066757	0.469924
ENSG00000120333	270.938	-0.104294	0.141904	0.136754	0.614085
ENSG00000206659	13.8811	0.00689216	0.123641	0.777373	NA
ENSG00000235750	2431.05	-0.190499	0.168546	0.0330438	0.350488
ENSG00000143207	885.938	0.0264235	0.0981009	0.673508	0.942074
ENSG00000252906	28.0257	0.0176488	0.12464	0.508345	NA
ENSG00000228686	33.5917	-0.0162649	0.123327	0.590743	0.921968
ENSG00000236021	9.48905	-0.0131985	0.125404	0.479277	NA
ENSG00000116183	29.5163	0.101159	0.188679	0.00733572	NA
ENSG00000120341	103.734	0.000983991	0.118839	0.981932	0.996889
ENSG00000254154	181.406	0.0117745	0.116607	0.796159	0.965226
ENSG00000242193	662.074	-0.0910352	0.11728	0.193583	0.690905
ENSG00000276563	12.2423	0.0334232	0.130111	0.157648	NA
ENSG00000224687	128.394	-0.0710501	0.136338	0.19367	0.690905
ENSG00000075391	3820.31	-0.0176891	0.0916034	0.772417	0.962585
ENSG00000270575	73.3256	0.0371776	0.121838	0.435559	0.871069
ENSG00000213058	33.0141	0.0376422	0.129371	0.248729	0.747644
ENSG00000213057	60.0358	-0.0326433	0.122535	0.452208	0.878134
ENSG00000273062	51.7151	0.0240116	0.120396	0.572096	0.918493
ENSG00000116191	1557.88	-0.0542272	0.111258	0.38929	0.847257
ENSG00000228196	65.8425	0.0249286	0.12099	0.552727	0.90969
ENSG00000116194	259.462	0.0371051	0.112883	0.520949	0.899941
ENSG00000116199	2882.66	-0.498427	0.159649	0.000109017	0.0113447
ENSG00000232750	33.75	0.0229617	0.12438	0.474264	0.884368
ENSG00000186283	836.256	-0.00474303	0.111606	0.927058	0.990216
ENSG00000143322	2882.8	0.171266	0.200904	0.0484147	0.411826
ENSG00000234041	9.47364	0.00648654	0.124352	0.751268	NA
ENSG00000231905	47.6263	0.0757246	0.150196	0.0886571	0.525359
ENSG00000231564	17.5534	-0.0292233	0.127483	0.292474	NA
ENSG00000225711	46.9261	-0.0109418	0.118901	0.784978	0.964489
ENSG00000057252	3033.47	-0.0935866	0.143741	0.162395	0.651991
ENSG00000162782	11.3464	0.0321401	0.130314	0.110882	NA
ENSG00000231966	18.8561	0.0115403	0.123695	0.660403	NA
ENSG00000169905	6200.49	-0.0483293	0.101966	0.43124	0.868831
ENSG00000272906	21.8864	0.00907506	0.122748	0.753974	NA
ENSG00000143337	1294.07	-0.0762982	0.117419	0.253626	0.750806
ENSG00000135837	3879.89	0.0560911	0.103759	0.389519	0.847316
ENSG00000235145	49.5539	0.0147288	0.119358	0.718013	0.951418
ENSG00000223450	49.2537	-0.0156989	0.119775	0.692844	0.94703
ENSG00000116260	6997.35	-0.0430094	0.12182	0.394221	0.850456
ENSG00000121454	406.173	0.0735594	0.121172	0.263279	0.75997
ENSG00000230124	1209.07	0.0345747	0.101508	0.585355	0.920566
ENSG00000235060	32.2054	0.0123194	0.122307	0.699005	0.948477
ENSG00000143324	2006.4	-0.127444	0.130551	0.103086	0.556729
ENSG00000135835	505.296	0.0486024	0.108094	0.442098	0.875267
ENSG00000243155	76.3373	0.0304888	0.120064	0.513951	0.897867
ENSG00000232586	58.4936	0.0589608	0.134713	0.203401	0.70446
ENSG00000251520	112.387	0.11763	0.180728	0.0658954	0.467835
ENSG00000270711	106.776	0.0945638	0.151527	0.123051	0.590849
ENSG00000135823	1346.74	0.0603644	0.106483	0.374827	0.838505
ENSG00000153029	1313.56	-0.300798	0.22734	0.0118032	0.205517
ENSG00000162783	1300.23	0.0594505	0.112132	0.357337	0.828248
ENSG00000135821	4926.54	-0.0213829	0.107195	0.710423	0.951236
ENSG00000203730	17.3121	-0.0160015	0.125008	0.494921	NA
ENSG00000135828	464.334	-0.049208	0.118859	0.396603	0.851876
ENSG00000143333	31.953	0.0789865	0.156154	0.0524369	0.425271
ENSG00000135838	93.9045	0.570509	0.305861	0.0023228	0.0856333
ENSG00000135829	3742.73	-0.014972	0.10804	0.789095	0.965082
ENSG00000135862	20086.5	-0.204363	0.16482	0.0277224	0.325624
ENSG00000224468	131.678	-0.0383461	0.118215	0.467238	0.883007
ENSG00000058085	45845.5	-0.0379132	0.12156	0.427889	0.867428
ENSG00000157064	519.346	0.380548	0.189178	0.00284391	0.0951268
ENSG00000233562	11.0267	0.0200548	0.126031	0.376643	NA
ENSG00000232860	77.8057	0.077104	0.149127	0.105033	0.560803
ENSG00000116698	4902.17	0.0497493	0.1018	0.449991	0.87777
ENSG00000116701	301.723	0.330151	0.23573	0.00926887	0.17725
ENSG00000162704	1358.85	-0.0827408	0.113929	0.22816	0.731851
ENSG00000143344	42.9607	0.058648	0.138073	0.148581	0.633285
ENSG00000173627	9.15712	0.00572049	0.124833	0.737564	NA
ENSG00000198860	329.037	-0.110269	0.147306	0.120806	0.588002
ENSG00000116667	113.669	-0.0615603	0.13235	0.232342	0.73513
ENSG00000116406	1242.9	-0.0819739	0.129772	0.206105	0.707296
ENSG00000135842	2550.18	0.178066	0.142754	0.0408128	0.38487
ENSG00000252222	9.97193	0.0404955	0.13339	0.0822771	NA
ENSG00000121481	493.492	-0.0153917	0.104656	0.793552	0.965226
ENSG00000232792	27.6722	0.0150458	0.122394	0.647088	NA
ENSG00000121486	547.425	-0.0383619	0.108332	0.525408	0.900757
ENSG00000116668	210.872	0.0273212	0.110256	0.635445	0.935575
ENSG00000231084	18.4316	0.0151855	0.123914	0.584283	NA
ENSG00000233583	20.6401	-0.000782489	0.122833	0.974649	NA
ENSG00000238061	17.9766	0.0121677	0.123746	0.645605	NA
ENSG00000279838	33.6437	0.0415633	0.131845	0.176734	0.674297
ENSG00000116679	2561.07	-0.0190866	0.0977726	0.757669	0.958942
ENSG00000273004	19.3372	-0.000650747	0.122886	0.97818	NA
ENSG00000261024	37.6721	0.00987458	0.120042	0.79337	0.965226
ENSG00000143341	137.388	-0.0341726	0.120714	0.471329	0.883657
ENSG00000116690	20.0143	-0.0588967	0.143558	0.0382688	NA
ENSG00000047410	5745.31	-0.031903	0.0937542	0.613695	0.928891
ENSG00000157181	656.777	0.0195693	0.100521	0.751339	0.95796
ENSG00000262180	64.6297	-0.00542412	0.117296	0.894306	0.984136
ENSG00000116703	8.98223	-0.0112059	0.124837	0.580238	NA
ENSG00000073756	1069.18	0.0422008	0.13397	0.0886045	0.525359
ENSG00000273129	12.5289	0.018622	0.126102	0.367251	NA
ENSG00000116711	395.369	-0.205338	0.235979	0.030971	0.340413
ENSG00000236030	30.1843	-0.00339169	0.120353	0.921485	0.988758
ENSG00000231599	17.335	-0.0342969	0.129555	0.208309	NA
ENSG00000272827	10.4144	-0.00153958	0.123884	0.940736	NA
ENSG00000230426	130.939	-0.0331512	0.115569	0.534483	0.90261
ENSG00000230987	54.1675	0.00188546	0.119458	0.961633	0.992822
ENSG00000162670	85.5058	-0.0184736	0.119815	0.651303	0.936759
ENSG00000150681	17.9904	-0.0243664	0.125963	0.377785	NA
ENSG00000232498	22.9206	0.00180455	0.122687	0.949541	NA
ENSG00000236069	22.9651	0.00340107	0.121569	0.91555	NA
ENSG00000090104	25.2971	0.0745174	0.156005	0.0223458	NA
ENSG00000127074	42.2415	0.00471854	0.11913	0.905311	0.985856
ENSG00000231767	18.2922	-0.0314849	0.12907	0.205656	NA
ENSG00000116741	107.078	0.00894239	0.11272	0.861114	0.977017
ENSG00000234871	11.971	0.00475287	0.124356	0.810914	NA
ENSG00000234473	39.3037	0.0138946	0.121454	0.692536	0.94703
ENSG00000116750	614.363	-0.0369078	0.102297	0.556129	0.911898
ENSG00000238754	7.93971	-0.00171643	0.124717	0.914134	NA
ENSG00000116747	1146.19	0.071549	0.119436	0.270408	0.766107
ENSG00000272579	42.4355	0.0190144	0.121346	0.620135	0.931878
ENSG00000023572	72.0641	0.0594013	0.133874	0.216041	0.719092
ENSG00000134371	1031.78	0.0162441	0.099825	0.792623	0.965226
ENSG00000162630	122.508	0.033859	0.120736	0.475884	0.884544
ENSG00000227240	30.7718	0.107825	0.191306	0.0217389	0.286918
ENSG00000233057	70.2815	0.0700787	0.144321	0.121036	0.588276
ENSG00000231714	86.3015	0.0610921	0.133969	0.216443	0.719253
ENSG00000228167	8.92246	0.00497901	0.12426	0.808108	NA
ENSG00000162687	137.818	1.50805	0.345906	5.70068e-07	0.000161021
ENSG00000000971	834.71	-0.0568965	0.119093	0.342978	0.818908
ENSG00000116785	12.7749	-0.00590688	0.123646	0.801988	NA
ENSG00000066279	7438.64	-0.245103	0.163289	0.0148599	0.235469
ENSG00000235748	65.9588	-0.0151735	0.120444	0.689482	0.946187
ENSG00000177888	844.663	0.0276933	0.111304	0.61341	0.928891
ENSG00000213047	962.903	0.108812	0.133526	0.137116	0.614544
ENSG00000213046	91.3345	0.0119876	0.118079	0.778114	0.962762
ENSG00000235582	21.4496	0.0107379	0.123042	0.706046	NA
ENSG00000233040	22.6479	0.0266509	0.126235	0.362974	NA
ENSG00000224901	19.1089	0.00690528	0.123002	0.800221	NA
ENSG00000143355	18.8132	0.0239992	0.125443	0.41423	NA
ENSG00000151414	1694.54	0.0282285	0.0968783	0.656955	0.938394
ENSG00000232824	18.6476	0.038044	0.131542	0.143427	NA
ENSG00000229989	179.36	0.130424	0.173053	0.0770046	0.496485
ENSG00000116833	197.191	-0.00253471	0.116932	0.951164	0.99237
ENSG00000203721	134.321	0.00723773	0.111897	0.889593	0.983393
ENSG00000230623	25.9376	0.0479099	0.134497	0.14714	NA
ENSG00000162702	1075.08	0.0609794	0.10297	0.359839	0.82989
ENSG00000118193	2459.65	-0.112243	0.146066	0.11792	0.584751
ENSG00000118197	571.729	0.00771758	0.10765	0.873932	0.980339
ENSG00000260088	19.023	-0.0510816	0.137384	0.0923477	NA
ENSG00000118200	4368.76	0.00590039	0.0984092	0.919732	0.988649
ENSG00000231333	38.1161	0.0459475	0.132488	0.193678	0.690905
ENSG00000163362	1380.41	-0.0377318	0.109085	0.528574	0.901664
ENSG00000233217	11.6296	-0.0150064	0.125275	0.476132	NA
ENSG00000116852	758.401	0.468062	0.204756	0.00119672	0.0577119
ENSG00000232237	42.6592	-0.0086022	0.120685	0.80577	0.966885
ENSG00000116857	1451.43	-0.199908	0.153838	0.0299311	0.333724
ENSG00000163395	7.88702	0.0500448	0.139533	0.0135633	NA
ENSG00000081277	3372.98	-0.0474476	0.109902	0.446325	0.876882
ENSG00000118194	76.8635	0.00901306	0.122017	0.776157	0.962623
ENSG00000159166	2281.49	-0.051786	0.116537	0.385063	0.84568
ENSG00000282221	28.7974	-0.0205267	0.123273	0.538702	NA
ENSG00000159173	61.312	-0.00352133	0.117275	0.932463	0.991204
ENSG00000174307	1233.17	-0.00455028	0.100904	0.938138	0.991439
ENSG00000159176	664.847	-0.0419574	0.120887	0.414716	0.860221
ENSG00000224536	12.237	-0.0252145	0.12752	0.254697	NA
ENSG00000223396	16.1169	-0.0177923	0.124782	0.493977	NA
ENSG00000134369	668.693	0.0764925	0.125336	0.23795	0.741564
ENSG00000231871	15.269	0.00824331	0.123271	0.756185	NA
ENSG00000235121	17.4781	-0.00869439	0.124004	0.705409	NA
ENSG00000198700	4103.24	-0.0276631	0.100031	0.659703	0.939604
ENSG00000277681	30.1221	-0.0251594	0.124452	0.451048	0.87777
ENSG00000198892	262.62	0.0398181	0.114159	0.487757	0.888622
ENSG00000223774	8.91867	-0.0140124	0.125065	0.511406	NA
ENSG00000163431	47.0857	0.0442419	0.131395	0.216491	0.719279
ENSG00000134375	339.606	0.0857042	0.140914	0.163378	0.653206
ENSG00000176393	2495.03	-0.216057	0.147089	0.0204192	0.277873
ENSG00000273478	72.7063	0.025958	0.117853	0.586925	0.920799
ENSG00000234678	52.7439	0.021803	0.119607	0.612846	0.928891
ENSG00000163435	1971.04	0.00466317	0.12341	0.855309	0.974852
ENSG00000249007	45.2235	0.0170568	0.123845	0.560833	0.91367
ENSG00000170075	99.8447	0.151044	0.217784	0.0444051	0.397879
ENSG00000143862	763.609	0.030672	0.102181	0.622242	0.93234
ENSG00000133067	279.831	-0.301041	0.372142	0.0146747	0.233424
ENSG00000077152	444.194	-0.342105	0.255915	0.00917021	0.176415
ENSG00000077157	2672.7	0.0302479	0.11263	0.588353	0.921501
ENSG00000229120	21.0508	0.00741091	0.122206	0.807558	NA
ENSG00000232626	125.54	-0.00503162	0.117623	0.904462	0.98582
ENSG00000253042	21.4436	-0.0372001	0.129891	0.220234	NA
ENSG00000143858	266.26	-0.0159266	0.111407	0.763455	0.959986
ENSG00000226862	18.7634	0.0446019	0.134044	0.122312	NA
ENSG00000117139	4690.24	0.0123665	0.0973946	0.843643	0.973388
ENSG00000235449	19.0658	0.017043	0.123979	0.553048	NA
ENSG00000226148	160.894	-0.00153738	0.112008	0.975579	0.99615
ENSG00000228288	63.5338	0.0104063	0.118753	0.799651	0.966297
ENSG00000214796	137.277	-0.0346575	0.120033	0.475741	0.884544
ENSG00000234996	23.6415	0.000556949	0.122221	0.986678	NA
ENSG00000183155	190.65	-0.0399892	0.112253	0.495068	0.891811
ENSG00000117153	698.813	-0.13069	0.154363	0.0901603	0.529681
ENSG00000230280	105.354	0.000676129	0.112292	0.990763	0.999153
ENSG00000199471	21.2473	-0.00677721	0.122872	0.802529	NA
ENSG00000159346	3426.44	-0.267344	0.176855	0.0127168	0.21479
ENSG00000159348	944.147	-0.00237193	0.104841	0.967151	0.994192
ENSG00000163444	936.7	0.00276341	0.0981989	0.965484	0.993624
ENSG00000143847	321.458	-0.00616304	0.103072	0.915771	0.987825
ENSG00000163485	99.4394	-0.0391528	0.119558	0.44808	0.877086
ENSG00000159388	650.338	0.0003002	0.114129	0.998854	0.999511
ENSG00000188783	7.99834	0.00715934	0.124828	0.687127	NA
ENSG00000058668	6028.8	-0.134413	0.159017	0.0919749	0.532778
ENSG00000236035	34.8119	0.0281399	0.125111	0.413653	0.859706
ENSG00000058673	7366.66	0.0216129	0.0966908	0.744387	0.956516
ENSG00000257315	2208.89	0.0195877	0.0971027	0.755179	0.958039
ENSG00000227417	211.804	0.07803	0.12979	0.219096	0.721427
ENSG00000223505	53.0644	-0.00238881	0.117176	0.953834	0.992537
ENSG00000182004	330.9	-0.0306117	0.113159	0.577332	0.919371
ENSG00000236430	45.4439	-0.0149937	0.119834	0.70217	0.949476
[truncated: 21,793 more rows]

## Sheet: Supplemental Table 4
	baseMean	log2FoldChange	lfcSE	pvalue	padj
ENSG00000227232	320.257	0.0292628	0.0704169	0.284394	0.753903
ENSG00000278267	14.9095	-0.0150942	0.0710732	0.035833	NA
ENSG00000238009	13.806	-0.00105913	0.0685916	0.879432	NA
ENSG00000233750	71.04	-0.000286448	0.0675756	0.983316	0.998182
ENSG00000268903	162.296	-0.00626073	0.0654636	0.769951	0.953525
ENSG00000269981	358.469	-0.0100365	0.0643297	0.683948	0.928794
ENSG00000241860	72.5742	0.0112178	0.0682108	0.490521	0.858738
ENSG00000279928	9.76141	-0.000354061	0.068661	0.953214	NA
ENSG00000279457	421.658	0.0623967	0.0936388	0.0825224	0.493914
ENSG00000228463	102.612	0.0437064	0.0867026	0.039438	0.359155
ENSG00000236743	13.054	-0.0102498	0.0697469	0.137413	NA
ENSG00000237094	49.9031	-0.0042672	0.0678385	0.74308	0.946507
ENSG00000230021	19.8135	0.0092802	0.0694601	0.225709	NA
ENSG00000225630	264.387	-0.0181282	0.0670007	0.453546	0.842662
ENSG00000237973	300.716	-0.114922	0.23044	0.0152993	0.216547
ENSG00000229344	28.402	-0.00397113	0.0683027	0.702663	NA
ENSG00000248527	1037.06	-0.144437	0.151049	0.0189041	0.243622
ENSG00000229376	17.6301	-0.00962851	0.0694515	0.243455	NA
ENSG00000228327	680.197	0.00745527	0.0610647	0.790969	0.958265
ENSG00000237491	248.676	-0.024917	0.0699342	0.306435	0.76648
ENSG00000230092	16.4661	-0.00489932	0.0686872	0.558815	NA
ENSG00000177757	28.5116	-0.00507081	0.0683146	0.644328	NA
ENSG00000228794	1556.27	-0.034807	0.0580027	0.340769	0.784908
ENSG00000225880	92.2928	-0.0246962	0.0724146	0.197382	0.678714
ENSG00000272438	33.3432	0.00335978	0.067988	0.780949	NA
ENSG00000230699	111.587	-0.013019	0.0679627	0.480413	0.855495
ENSG00000223764	111.687	-0.0109428	0.0674293	0.553358	0.886252
ENSG00000187634	116.481	-0.0381147	0.0805333	0.0849917	0.500295
ENSG00000188976	4954.37	-0.0276267	0.0541529	0.426365	0.830518
ENSG00000187961	985.622	-0.0274827	0.0593045	0.409916	0.82126
ENSG00000187583	504.833	-0.0279414	0.0669451	0.351539	0.791698
ENSG00000187642	167.322	-0.00437788	0.0652755	0.837385	0.968995
ENSG00000272512	227.228	0.0100049	0.0638175	0.702994	0.934795
ENSG00000188290	2605.1	-0.026708	0.0595382	0.438775	0.836335
ENSG00000187608	263.541	0.0119413	0.0647903	0.632792	0.913409
ENSG00000224969	25.0717	0.0111953	0.0696889	0.222602	NA
ENSG00000188157	43931.8	-0.0516932	0.0469807	0.149438	0.616337
ENSG00000217801	658.786	0.0122568	0.0589091	0.771259	0.954355
ENSG00000273443	65.0174	-0.00164111	0.0674319	0.9064	0.982779
ENSG00000237330	503.507	0.0201872	0.0662638	0.456986	0.843414
ENSG00000131591	2118.87	-0.0678286	0.066031	0.102535	0.537231
ENSG00000207730	68.3601	-0.012254	0.0688282	0.408996	0.820988
ENSG00000207607	28.2475	-0.00563929	0.0686332	0.547992	NA
ENSG00000198976	36.6394	-0.0266222	0.0755428	0.0370993	NA
ENSG00000272141	249.194	-0.061834	0.0991529	0.0585557	0.424633
ENSG00000205231	51.2287	-0.00882846	0.0685473	0.487203	0.857892
ENSG00000162571	95.4885	-0.00291235	0.066495	0.869153	0.974818
ENSG00000078808	10962.4	-0.0680683	0.0650359	0.107589	0.548766
ENSG00000176022	2989.28	-0.098387	0.0702376	0.0344257	0.335014
ENSG00000184163	38.3269	-0.000729785	0.0678143	0.950977	NA
ENSG00000260179	26.4247	-0.000665292	0.0681935	0.944437	NA
ENSG00000160087	3975.59	0.065644	0.0628817	0.110396	0.555404
ENSG00000230415	177.208	-0.0332602	0.0749863	0.178359	0.655178
ENSG00000162572	927.713	-0.022456	0.0620772	0.480002	0.855411
ENSG00000131584	4377.67	-0.0931306	0.0673499	0.0390066	0.356608
ENSG00000169972	1158.54	-0.121829	0.10913	0.0244746	0.278289
ENSG00000127054	7301.3	-0.0308011	0.0492672	0.389705	0.813548
ENSG00000240731	227.521	-0.00734477	0.0645516	0.756717	0.949444
ENSG00000224051	1891.75	-0.000793519	0.054063	0.980042	0.997562
ENSG00000169962	135.49	-0.026317	0.0718407	0.239643	0.719219
ENSG00000107404	3006.78	-0.032452	0.0552163	0.373492	0.804319
ENSG00000162576	103.994	-0.0160307	0.0685226	0.409229	0.820988
ENSG00000175756	1078.84	-0.0401288	0.0726544	0.220761	0.702634
ENSG00000221978	4647.04	-0.043257	0.0606276	0.249391	0.725321
ENSG00000224870	314.765	0.0274738	0.0685822	0.33122	0.778777
ENSG00000242485	1308.75	-0.0503584	0.067858	0.184376	0.662085
ENSG00000272455	91.8343	0.016073	0.0689962	0.377323	0.806511
ENSG00000225285	59.401	-0.00373138	0.0680072	0.754675	0.949164
ENSG00000179403	2760.94	-0.258835	0.0809471	9.00473e-05	0.00612935
ENSG00000215915	235.887	-0.0504335	0.0879458	0.0823366	0.493914
ENSG00000160072	1073.23	0.0413678	0.0637033	0.247776	0.724585
ENSG00000197785	1305.9	-0.0250273	0.0631304	0.430715	0.832559
ENSG00000205090	46.9577	-0.0153516	0.0701789	0.239053	NA
ENSG00000160075	3483.44	-0.0384973	0.0581371	0.319343	0.771253
ENSG00000215014	18.6033	0.00240617	0.0683998	0.793185	NA
ENSG00000228594	630.138	-0.132127	0.141773	0.022777	0.268995
ENSG00000272106	118.772	-0.0230864	0.0705679	0.282385	0.752263
ENSG00000197530	1297.96	-0.0407192	0.0655866	0.277063	0.747054
ENSG00000189409	11.2506	-0.00890664	0.0694535	0.202979	NA
ENSG00000248333	1040.62	-0.0163496	0.0550848	0.623134	0.910384
ENSG00000189339	3185.41	-0.0968307	0.0677891	0.0337663	0.332635
ENSG00000269737	92.9765	0.00326901	0.0667557	0.851524	0.971628
ENSG00000215914	10.0864	-0.00342364	0.0688634	0.526669	NA
ENSG00000008128	501.771	0.0420472	0.0713617	0.221175	0.703056
ENSG00000268575	277.42	-0.00885724	0.0640704	0.72908	0.942539
ENSG00000227775	189.695	-0.010529	0.0648402	0.663647	0.924286
ENSG00000215790	168.218	-0.0487449	0.087731	0.0751559	0.476687
ENSG00000008130	2335.81	-0.0221995	0.0504452	0.53312	0.876979
ENSG00000078369	10716.5	-0.0144061	0.0490628	0.690716	0.930846
ENSG00000231050	19.7619	-0.0071076	0.0689821	0.393385	NA
ENSG00000178821	33.0805	0.00976557	0.0689459	0.403883	NA
ENSG00000067606	867.043	0.0564919	0.0771299	0.13958	0.602502
ENSG00000271806	25.1005	0.0103668	0.0693622	0.301579	NA
ENSG00000182873	88.4373	2.42179e-05	0.0664462	0.999732	0.999875
ENSG00000162585	911.751	-0.0377493	0.065277	0.285316	0.75477
ENSG00000157933	3183.75	-0.020485	0.0539421	0.527373	0.873704
ENSG00000116151	466.474	0.00238443	0.0607314	0.935174	0.989781
ENSG00000269896	228.414	-0.0232786	0.0679422	0.374485	0.80461
ENSG00000272420	10.5128	-0.00207014	0.0686512	0.761191	NA
ENSG00000157916	2078.94	-0.0359015	0.0580589	0.326719	0.775621
ENSG00000157911	627.714	-0.0089557	0.0618657	0.750757	0.947831
ENSG00000149527	59.9916	-0.00711915	0.0678635	0.622416	0.910217
ENSG00000157881	1016.42	-0.0345189	0.0633182	0.353082	0.792534
ENSG00000272449	10.4765	-0.00280714	0.0686951	0.678813	NA
ENSG00000238164	22.3543	-4.42305e-05	0.0684286	0.993688	NA
ENSG00000157873	467.964	-0.00013315	0.0594583	0.995477	0.99893
ENSG00000228037	11.4524	0.00746391	0.0692139	0.276374	NA
ENSG00000157870	422.38	-0.0257046	0.0665054	0.382558	0.80824
ENSG00000130762	2390.36	-0.0696576	0.0635483	0.0941047	0.519481
ENSG00000272088	30.0335	0.00728363	0.0687209	0.483136	NA
ENSG00000162591	2665.43	-0.0597436	0.0632637	0.13781	0.601207
ENSG00000158109	1504.6	-0.0327647	0.0601647	0.348577	0.789728
ENSG00000116213	985.571	-0.0899648	0.0891734	0.0576515	0.42258
ENSG00000078900	1191.11	-0.0609549	0.0713175	0.13073	0.593076
ENSG00000227589	18.3581	-0.00636794	0.0688716	0.445563	NA
ENSG00000227372	1166.84	-0.0535523	0.0726282	0.165333	0.638967
ENSG00000235169	25.6798	0.00186668	0.0683299	0.844846	NA
ENSG00000130764	1887.71	0.00341429	0.0501845	0.922062	0.987327
ENSG00000272153	25.1914	0.00803965	0.0690135	0.387073	NA
ENSG00000116198	2050.96	0.154202	0.0908805	0.00848484	0.154387
ENSG00000169598	244.394	-0.00951678	0.0641735	0.703664	0.935018
ENSG00000198912	923.943	-0.0138339	0.0563392	0.677775	0.927335
ENSG00000236423	53.2517	-0.0123527	0.0690704	0.37485	0.80461
ENSG00000131697	1594.94	-0.0208154	0.0537741	0.561749	0.888454
ENSG00000069424	291.718	-0.040017	0.0759214	0.180415	0.656779
ENSG00000116254	39.3944	-0.000138444	0.0678438	0.98884	NA
ENSG00000116251	3306.36	-0.0660847	0.0578905	0.0996916	0.531867
ENSG00000226944	11.748	0.00193347	0.0686649	0.773803	NA
ENSG00000158286	785.174	0.0790722	0.0924952	0.0760303	0.479795
ENSG00000116237	5295.2	-0.0494242	0.0512697	0.189711	0.669268
ENSG00000225077	15.4022	-0.000213169	0.0685294	0.975469	NA
ENSG00000158292	556.288	-0.140063	0.156682	0.0214408	0.260343
ENSG00000097021	1608.35	-0.00474084	0.0550566	0.885824	0.979554
ENSG00000069812	444.325	0.0722031	0.099441	0.0693643	0.458617
ENSG00000187017	898.919	0.0329827	0.0632216	0.341638	0.784908
ENSG00000231868	31.536	0.0145191	0.0701866	0.216421	NA
ENSG00000215788	438.191	-0.0375948	0.0701324	0.244413	0.720883
ENSG00000171680	836.038	0.0241237	0.0598358	0.477454	0.85494
ENSG00000162408	1865.11	0.0193102	0.0529694	0.577408	0.894256
ENSG00000229519	21.2683	0.00816846	0.0690769	0.363143	NA
ENSG00000204859	400.414	0.0851936	0.115097	0.0541583	0.411728
ENSG00000162413	1381.6	-0.00498398	0.0549644	0.880326	0.977816
ENSG00000116273	1282.5	0.00900671	0.0571565	0.78048	0.956191
ENSG00000041988	277.752	0.0491429	0.0815448	0.132537	0.59476
ENSG00000007923	1075.02	-0.0105014	0.0576145	0.744431	0.946864
ENSG00000237436	10.3571	-0.00239338	0.0687395	0.69366	NA
ENSG00000171735	606.173	0.114827	0.11906	0.0312267	0.319575
ENSG00000049245	1977.6	-0.0255155	0.0569336	0.468237	0.848734
ENSG00000269925	15.4133	0.00449032	0.0686548	0.591752	NA
ENSG00000049246	2508.26	0.0940999	0.0738272	0.0449742	0.381908
ENSG00000236266	25.4675	0.00688529	0.068857	0.447677	NA
ENSG00000116288	1237.86	-0.0467708	0.0695338	0.202411	0.683758
ENSG00000116285	3285.34	0.374201	0.0755614	4.29457e-08	7.74833e-06
ENSG00000238290	28.9434	-0.00621344	0.0684982	0.562364	NA
ENSG00000227634	25.338	0.0182429	0.0717736	0.0799981	NA
ENSG00000162426	20.2075	-0.00125057	0.0684359	0.881203	NA
ENSG00000142599	5743.7	-0.00258849	0.0453465	0.93953	0.990605
ENSG00000232912	23.429	-0.00430809	0.0684525	0.654844	NA
ENSG00000234619	13.2189	0.0147864	0.0709871	0.0364203	NA
ENSG00000224315	16.5104	0.00629774	0.0690602	0.34384	NA
ENSG00000074800	35596.7	-0.0601967	0.0580088	0.127661	0.589049
ENSG00000236269	84.8751	0.00182047	0.0670797	0.909407	0.983489
ENSG00000180758	1317.47	-0.0235823	0.0585758	0.489885	0.858673
ENSG00000228526	133.954	-0.010904	0.0669417	0.583421	0.896933
ENSG00000234546	21.6177	-0.000444452	0.0682216	0.962506	NA
ENSG00000049239	2926.8	-0.0739672	0.0638246	0.078637	0.486607
ENSG00000171621	511.161	-0.0143833	0.0630606	0.612767	0.908284
ENSG00000171612	619.975	-0.0155197	0.060646	0.616869	0.908358
ENSG00000231181	16.9346	0.000102412	0.0685425	0.991213	NA
ENSG00000188807	1654.98	-0.061106	0.0695565	0.134138	0.597445
ENSG00000171608	76.9631	-0.00519323	0.0673448	0.736903	0.945117
ENSG00000171603	7840.77	-0.128823	0.0608624	0.00562472	0.121544
ENSG00000178585	1964.15	-0.0526045	0.0675075	0.174921	0.65063
ENSG00000162441	898.818	-0.013425	0.0596099	0.66866	0.925861
ENSG00000228150	19.0409	-0.0025182	0.0684506	0.771952	NA
ENSG00000173614	221.703	0.00507093	0.0636297	0.839401	0.969101
ENSG00000202415	11.6044	0.00426046	0.0687531	0.562765	NA
ENSG00000283611	7.80839	0.00145094	0.0687712	0.785628	NA
ENSG00000130939	3114.07	-0.0126623	0.0490757	0.71721	0.938339
ENSG00000054523	3206.81	-0.0314281	0.0571159	0.384245	0.809565
ENSG00000142657	6478.52	-0.234296	0.0682743	4.92381e-05	0.00378123
ENSG00000251503	15.2616	-0.000326371	0.068614	0.959282	NA
ENSG00000175279	32.5803	-0.000605866	0.068004	0.955439	NA
ENSG00000241563	19.3302	-0.00414775	0.0685603	0.636827	NA
ENSG00000160049	2102.25	0.00814065	0.053195	0.813525	0.964266
ENSG00000142655	640.145	-0.0350103	0.0669323	0.295695	0.759392
ENSG00000130940	3400.31	-0.141679	0.077065	0.00790302	0.147698
ENSG00000272078	139.052	0.00785646	0.0658551	0.714478	0.937706
ENSG00000175262	10.9304	-0.00316107	0.0687328	0.634461	NA
ENSG00000120948	2686.16	0.0148033	0.0483442	0.670989	0.926117
ENSG00000009724	53.1373	0.00202989	0.0675903	0.882739	0.978389
ENSG00000271895	18.5243	0.00864849	0.069191	0.32513	NA
ENSG00000116649	2436.39	-0.0435525	0.066701	0.232757	0.713964
ENSG00000171824	2031.2	0.0615682	0.0625947	0.126382	0.586481
ENSG00000226849	20.8919	-0.00340464	0.0685447	0.685906	NA
ENSG00000230337	14.8502	-0.000622899	0.0685811	0.929451	NA
ENSG00000198793	6960.62	-0.000787899	0.0444894	0.966118	0.995362
ENSG00000225602	9.79829	0.00692308	0.0692278	0.23353	NA
ENSG00000171819	38.4847	-0.00199402	0.0684135	0.819334	NA
ENSG00000120942	835.386	-0.0306396	0.0623599	0.370077	0.802476
ENSG00000204624	174.519	0.0379111	0.078001	0.151906	0.6223
ENSG00000116661	213.036	0.00956431	0.0647802	0.688642	0.930186
ENSG00000132879	440.134	-0.0105559	0.0627328	0.701931	0.934735
ENSG00000116663	108.866	0.0162457	0.0687598	0.392126	0.815002
ENSG00000116670	987.112	0.0100057	0.057055	0.764117	0.951658
ENSG00000162490	33.1605	-0.0115514	0.069308	0.331224	NA
ENSG00000177674	967.239	0.00667122	0.0593531	0.828332	0.966893
ENSG00000177000	1166.89	-0.0927297	0.0836938	0.0499041	0.398372
ENSG00000011021	940.505	-0.0178359	0.0587903	0.586896	0.898349
ENSG00000242349	39.5562	-0.00138769	0.0678062	0.909393	NA
ENSG00000175206	15.3723	-0.00104676	0.0685127	0.891642	NA
ENSG00000199347	38.1873	-0.000458988	0.0679586	0.966368	NA
ENSG00000201801	18.0543	0.00650717	0.0689558	0.409925	NA
ENSG00000116685	2709.39	-0.0240624	0.0519313	0.501382	0.863778
ENSG00000083444	2949.79	-0.0111176	0.049557	0.748332	0.947831
ENSG00000116688	5095.5	0.0281496	0.0549892	0.436163	0.835081
ENSG00000116691	982.236	0.028199	0.0629052	0.401115	0.818131
ENSG00000202461	12.8164	-0.00594287	0.06903	0.355812	NA
ENSG00000048707	5166.1	0.00852448	0.0532866	0.805376	0.962605
ENSG00000239149	23.5885	0.0106851	0.0694011	0.296775	NA
ENSG00000162496	3317.36	0.101186	0.105341	0.0406211	0.363942
ENSG00000272482	58.002	-0.00499427	0.0677906	0.712435	0.937493
ENSG00000116731	5359.17	-0.00404745	0.0457136	0.904896	0.982714
ENSG00000189337	1271.25	-0.0112173	0.0560963	0.771966	0.954395
ENSG00000175147	331.29	0.0385323	0.0747271	0.198551	0.679919
ENSG00000171729	738.436	0.053927	0.0791472	0.133617	0.596574
ENSG00000204464	38.3764	0.0343385	0.0812334	0.00576726	NA
ENSG00000215720	18.9564	0.0017552	0.0684759	0.834215	NA
ENSG00000278480	9.30549	0.000257581	0.0686727	0.968766	NA
ENSG00000142621	59.1992	-0.00723678	0.0675718	0.638455	0.914082
ENSG00000142634	996.355	-0.0525941	0.0686455	0.17556	0.651394
ENSG00000215704	9.28873	-0.00396705	0.0688881	0.482158	NA
ENSG00000132906	468.721	0.0129554	0.0625007	0.650192	0.918868
ENSG00000116138	1344.24	-0.0232357	0.0594414	0.492044	0.859034
ENSG00000116771	62.7478	0.00149013	0.0669989	0.923599	0.987327
ENSG00000237301	9.94891	0.00486133	0.0689907	0.376351	NA
ENSG00000197312	2224.3	0.000607762	0.0489365	0.963592	0.995351
ENSG00000116786	2938.36	0.0552222	0.06695	0.164062	0.636758
ENSG00000237938	69.2211	-0.0046479	0.0672594	0.765786	0.951658
ENSG00000162461	24.2219	-0.0021736	0.0682644	0.825581	NA
ENSG00000162458	1957.69	0.0041335	0.0563075	0.885102	0.979266
ENSG00000224321	30.5906	1.5041	0.487699	7.45001e-05	NA
ENSG00000233954	138.745	-0.0304142	0.0749113	0.15342	0.623745
ENSG00000178715	15.7349	-0.00709101	0.0689695	0.399093	NA
ENSG00000179743	178.493	-0.0130961	0.0667975	0.542723	0.88212
ENSG00000065526	8919.43	0.0415598	0.0489988	0.241148	0.72006
ENSG00000116809	702.793	0.00328983	0.0603402	0.911651	0.984112
ENSG00000234607	8.75987	-0.010078	0.0697825	0.102662	NA
ENSG00000173641	91.2098	0.00247136	0.0668858	0.882143	0.978186
ENSG00000186510	95.8469	-0.0395722	0.0824259	0.0618784	0.436266
ENSG00000185519	23.5526	0.0184807	0.0719363	0.0656418	NA
ENSG00000142627	2865.59	0.118979	0.079631	0.0196919	0.248588
ENSG00000227959	69.6813	0.0198456	0.0712017	0.210199	0.692119
ENSG00000224621	18.148	-0.000640457	0.0684551	0.936036	NA
ENSG00000142632	1709.06	-0.111506	0.0827216	0.0261232	0.289774
ENSG00000237276	39.7315	-0.0136247	0.0697531	0.275305	NA
ENSG00000132881	170.135	-0.0194992	0.068832	0.37	0.802426
ENSG00000037637	1391.18	0.158506	0.107918	0.0110443	0.180358
ENSG00000055070	3700.9	-0.0304748	0.0534618	0.398153	0.816364
ENSG00000226457	17.8176	-0.00913298	0.0693998	0.245406	NA
ENSG00000187144	24.5889	0.00856906	0.0690638	0.371951	NA
ENSG00000157191	727.256	-0.0139553	0.0576607	0.668414	0.925777
ENSG00000226029	66.8336	-0.00123798	0.067223	0.931576	0.988887
ENSG00000080947	137.994	-0.0308092	0.0740681	0.185675	0.663954
ENSG00000206652	20.0077	0.00289867	0.068554	0.711553	NA
ENSG00000219481	2419.77	-0.0541041	0.059116	0.167449	0.642174
ENSG00000215908	808.984	0.0309038	0.0645442	0.353936	0.792822
ENSG00000186301	151.154	-0.0127086	0.0673783	0.521621	0.872378
ENSG00000236698	18.8953	-0.000605855	0.068397	0.942546	NA
ENSG00000268869	15.6373	-0.00097522	0.0684951	0.900527	NA
ENSG00000058453	212.875	-0.0195703	0.0678877	0.407677	0.819898
ENSG00000207389	8.8	0.00133528	0.0686838	0.833075	NA
ENSG00000186715	51.9577	0.00249544	0.0679449	0.818264	0.964575
ENSG00000226526	7.8024	0.00579073	0.0690916	0.300454	NA
ENSG00000159363	6078.4	-0.108163	0.0669062	0.0197271	0.248588
ENSG00000117118	1708.41	0.00642739	0.0540526	0.850166	0.971628
ENSG00000117115	25654.3	-0.0537803	0.0519168	0.241626	0.72006
ENSG00000204362	158.371	-0.0104655	0.0668609	0.596587	0.901814
ENSG00000142623	231.282	-0.0127972	0.0665621	0.559332	0.888454
ENSG00000142619	78.7112	-0.0256153	0.0733942	0.153925	0.624461
ENSG00000179051	8767.32	-0.0246316	0.0475047	0.577491	0.894256
ENSG00000074964	1846.76	0.206732	0.0948542	0.00203313	0.0627755
ENSG00000179023	18.7854	-0.000410132	0.0684194	0.960323	NA
ENSG00000009709	865.564	-0.0762211	0.0908783	0.0783359	0.486027
ENSG00000159423	1424.96	-0.0226116	0.0596231	0.496687	0.862025
ENSG00000169991	1959.11	0.0268001	0.0607611	0.430788	0.832559
ENSG00000272084	34.2231	0.00149204	0.0679794	0.898553	NA
ENSG00000127481	20722.4	0.121786	0.0622607	0.00862346	0.155962
ENSG00000127463	3652.01	-0.0159595	0.0502678	0.644106	0.915392
ENSG00000053372	899.343	-0.027558	0.0627342	0.406446	0.819272
ENSG00000211454	45.3229	-0.0147574	0.069876	0.273995	NA
ENSG00000162482	39.2394	0.0148656	0.0702705	0.211173	NA
ENSG00000270728	193.082	-0.010491	0.0649794	0.661319	0.922697
ENSG00000053371	741.145	-0.0555989	0.080632	0.132197	0.594179
ENSG00000200403	13.2947	-0.00743635	0.0692492	0.247654	NA
ENSG00000040487	485.166	-0.028213	0.0660319	0.373666	0.804319
ENSG00000077549	5057.39	-0.00751075	0.0512924	0.832712	0.967489
ENSG00000173436	200.002	0.0101702	0.0651255	0.668043	0.925657
ENSG00000226396	17.3702	-0.00502424	0.0687119	0.544217	NA
ENSG00000158747	275.877	-0.0155824	0.0649084	0.5537	0.886252
ENSG00000158748	16.9695	-0.00363974	0.0686984	0.617984	NA
ENSG00000162542	691.054	0.0182089	0.0598691	0.573519	0.893048
ENSG00000169914	615.425	-0.0217134	0.0608558	0.504965	0.865695
ENSG00000188257	57.0337	0.0203853	0.0718315	0.156599	0.628075
ENSG00000227066	11.0255	-0.00638803	0.0690323	0.361523	NA
ENSG00000162545	1060.78	-0.0693338	0.080815	0.100043	0.532766
ENSG00000090432	1049.25	0.0213357	0.0580267	0.527125	0.873704
ENSG00000158825	70.449	-0.00903248	0.0677338	0.57725	0.894256
ENSG00000158828	2028.38	-0.0765564	0.0799586	0.0797096	0.488401
ENSG00000117242	529.681	-0.241926	0.147601	0.00434855	0.104312
ENSG00000244038	6435.95	-0.0634839	0.0558853	0.10809	0.549824
ENSG00000127483	6354.12	-0.0203157	0.0474291	0.559778	0.888454
ENSG00000075151	18.2755	0.00289548	0.0687276	0.661198	NA
ENSG00000117298	4745.42	-0.027996	0.0500446	0.447675	0.839834
ENSG00000236936	21.6818	-0.000464764	0.0683521	0.956881	NA
ENSG00000231105	21.3492	0.000112781	0.0684568	0.991128	NA
ENSG00000227001	159.885	0.0160848	0.0680402	0.434533	0.834354
ENSG00000142794	857.077	0.00248738	0.0563861	0.934342	0.989779
ENSG00000076864	548.856	-0.0335002	0.0659584	0.31741	0.771229
ENSG00000090686	1666.99	0.0275204	0.0546285	0.440327	0.836434
ENSG00000187942	13.0267	-0.01248	0.0702821	0.0791613	NA
ENSG00000142798	3886.51	0.0803333	0.0647203	0.0627708	0.439454
ENSG00000232037	31.5311	0.0260499	0.0754082	0.0283099	NA
ENSG00000218510	355.416	0.00612833	0.061641	0.827565	0.966775
ENSG00000070831	5229.99	0.0187514	0.0526294	0.593135	0.900624
ENSG00000230068	27.8678	-0.00898716	0.0689564	0.400835	NA
ENSG00000271428	23.4319	-0.00630255	0.0687944	0.477756	NA
ENSG00000271840	24.8256	0.00937495	0.069186	0.338679	NA
ENSG00000162552	419.843	0.18693	0.184917	0.0117513	0.186953
ENSG00000184677	2040.39	0.0858422	0.069412	0.0548009	0.413631
ENSG00000237200	52.7474	0.0134802	0.0692312	0.356813	0.794569
ENSG00000133216	4707.71	-0.0620439	0.0599265	0.119627	0.574538
ENSG00000225952	12.3405	0.0034475	0.0686907	0.637456	NA
ENSG00000004487	5844.76	0.0138086	0.0468642	0.639138	0.914184
ENSG00000169641	6472.74	0.0585495	0.054126	0.133024	0.595705
ENSG00000229010	22.9222	-0.00083362	0.068312	0.927033	NA
ENSG00000179546	239.123	0.0205948	0.0677318	0.405981	0.819263
ENSG00000261326	247.168	-0.0211225	0.0685774	0.37497	0.804698
ENSG00000125944	6548.18	0.0108963	0.0506673	0.758695	0.950033
ENSG00000125945	1790.55	0.0396462	0.0557787	0.290951	0.756808
ENSG00000249087	291.305	-0.0249417	0.0682055	0.362499	0.798637
ENSG00000204219	1055.15	0.00192566	0.0598397	0.949545	0.991524
ENSG00000088280	1452.59	0.0035383	0.0558175	0.915856	0.985377
ENSG00000007968	4815.73	-0.000448528	0.0570329	0.987675	0.998182
ENSG00000235052	34.5575	0.0048743	0.0683367	0.652889	NA
ENSG00000117318	1660.18	0.0109134	0.0558917	0.733958	0.943921
ENSG00000142676	5558.41	-0.0721061	0.0839879	0.0890273	0.511358
ENSG00000011007	6406.36	-0.034259	0.0516094	0.343911	0.78573
ENSG00000236810	94.7047	0.0204573	0.07061	0.267415	0.738982
ENSG00000057757	2474.34	-0.00800588	0.0497752	0.674155	0.926479
ENSG00000011009	3052.22	-0.112189	0.0731031	0.0217394	0.262205
ENSG00000117308	1752.35	0.0174851	0.0565848	0.581263	0.896161
ENSG00000117305	675.849	0.0351932	0.0663438	0.312441	0.768516
ENSG00000179163	980.432	-0.0407136	0.0662552	0.259137	0.730526
ENSG00000189266	3916.78	-0.00808406	0.0516591	0.810861	0.963855
ENSG00000188529	5117.42	-0.0124589	0.0500305	0.732247	0.943533
ENSG00000142677	121.02	0.0221171	0.0709186	0.260605	0.731912
ENSG00000185436	542.353	-0.023071	0.0637351	0.454493	0.843062
ENSG00000232298	17.0371	-0.00331795	0.0686282	0.666072	NA
ENSG00000158055	930.141	0.0037116	0.0611674	0.894849	0.980849
ENSG00000001460	858.523	0.0318449	0.0614666	0.361814	0.798198
ENSG00000001461	3781.41	-0.0213238	0.0504412	0.545654	0.882823
ENSG00000117602	2563.48	-0.0358686	0.0533106	0.342841	0.785113
ENSG00000184454	176.951	-0.0389178	0.0785977	0.131528	0.594009
ENSG00000133226	12086.9	0.106989	0.0582209	0.0132398	0.199014
ENSG00000169504	18928.9	0.0965778	0.0653135	0.0318018	0.322432
ENSG00000020633	2412.43	0.0242828	0.0624283	0.448918	0.840528
ENSG00000229162	32.6764	0.0150659	0.0705223	0.166889	NA
ENSG00000117614	868.43	0.0514054	0.0705956	0.178672	0.655178
ENSG00000117616	3417.7	-0.118525	0.109583	0.0280929	0.300709
ENSG00000261349	27.6809	-0.00472385	0.068388	0.647102	NA
ENSG00000187010	135.217	0.0417938	0.0829048	0.0795966	0.488108
ENSG00000224183	17.086	0.0204738	0.0731453	0.00924669	NA
ENSG00000183726	4718.48	-0.0159951	0.0489567	0.646826	0.916735
ENSG00000188672	30.7968	-0.0112058	0.0694726	0.287122	NA
ENSG00000204178	2508.57	-0.00803218	0.0487755	0.815831	0.964268
ENSG00000157978	3291.01	-0.0170082	0.0481431	0.625931	0.911326
ENSG00000225643	26.5402	-0.0157843	0.0708991	0.117879	NA
ENSG00000117643	369.851	-0.0771258	0.107886	0.056933	0.420859
ENSG00000162430	7612.25	-0.0274978	0.0499758	0.444483	0.838826
ENSG00000228172	121.224	0.0180403	0.0685051	0.411716	0.82195
ENSG00000117640	2374.99	-0.0468881	0.0600021	0.222435	0.705418
ENSG00000127423	1076.79	0.028764	0.0601859	0.391929	0.814818
ENSG00000182749	759.648	-0.00360315	0.0564551	0.910922	0.984057
ENSG00000117632	20409.6	-0.0378027	0.05337	0.31027	0.767427
ENSG00000158006	763.334	-0.00970236	0.0595461	0.751842	0.948277
ENSG00000158008	53.4549	-0.00753255	0.0683737	0.543223	0.88212
ENSG00000158014	52.9234	-0.00362092	0.0678074	0.779064	0.956191
ENSG00000158022	31.0833	-0.00116609	0.0680182	0.91558	NA
ENSG00000175087	1413.1	-0.000858669	0.0548378	0.968528	0.995518
ENSG00000236782	69.1694	-0.00765633	0.0680991	0.579278	0.895034
ENSG00000142675	1890.42	0.00208239	0.0494432	0.936907	0.990273
ENSG00000130695	3224.35	0.0199702	0.0495187	0.564161	0.888906
ENSG00000270733	16.8145	-0.00767197	0.0690226	0.379187	NA
ENSG00000142669	4918.16	-0.0417301	0.0637955	0.248088	0.724717
ENSG00000158062	681.95	-0.00284184	0.0573343	0.923765	0.987327
ENSG00000176092	1990.84	-0.0716946	0.0727687	0.0936877	0.519481
ENSG00000131914	16.9339	0.011139	0.0697472	0.197883	NA
ENSG00000117682	3044.39	-0.00475559	0.0494055	0.89217	0.980004
ENSG00000223583	16.381	-0.00261124	0.0685971	0.729646	NA
ENSG00000225891	63.4508	-0.0072949	0.0680149	0.600645	0.903447
ENSG00000198830	18736	-0.0307292	0.0503965	0.437224	0.835223
ENSG00000117676	3767.42	-0.010487	0.0497331	0.764067	0.951658
ENSG00000260063	39.5399	0.00570167	0.0683139	0.619498	NA
ENSG00000117713	8944.6	0.015877	0.0457242	0.64144	0.914669
ENSG00000060642	445.46	-0.00156637	0.0601978	0.956502	0.993768
ENSG00000204160	1092.31	-0.00801001	0.057661	0.807419	0.963083
ENSG00000175793	4499.42	-0.022449	0.0688448	0.298964	0.760617
ENSG00000142751	1151.06	0.00510932	0.0547956	0.874354	0.976606
ENSG00000198746	243.486	-0.00395757	0.0630652	0.876525	0.977385
ENSG00000090273	1498.26	0.00570236	0.0574853	0.859882	0.972595
ENSG00000175707	1046.2	0.0252874	0.0596574	0.458513	0.84414
ENSG00000253368	214.267	0.0276917	0.0715014	0.257735	0.730246
ENSG00000158246	1051.02	0.466843	0.116988	3.17966e-06	0.000358227
ENSG00000090020	2879.1	0.0853937	0.072677	0.058523	0.424633
ENSG00000142784	2421.3	-0.0463758	0.0578692	0.206108	0.687256
ENSG00000186501	1661.32	-0.0286055	0.0553471	0.425511	0.83029
ENSG00000241547	46.0838	-0.00935002	0.0686029	0.469113	NA
ENSG00000142765	1468.55	-0.210419	0.0909486	0.00145394	0.0490377
ENSG00000142733	2217.46	-0.0552634	0.0691032	0.162636	0.635416
ENSG00000181773	22.9186	0.0126737	0.06993	0.209771	NA
ENSG00000158195	7253.28	0.00326325	0.0497863	0.924498	0.987327
ENSG00000126705	2089.82	-0.00949346	0.0582901	0.764869	0.951658
ENSG00000126709	37.9319	0.00373622	0.0680935	0.748539	NA
ENSG00000009780	319.117	-0.0251407	0.0661733	0.40311	0.818379
ENSG00000117758	833.93	0.0310986	0.0632618	0.379599	0.807402
ENSG00000117751	1170.58	0.0614856	0.0677696	0.131995	0.594124
ENSG00000252947	16.358	-0.00286447	0.0685753	0.716835	NA
ENSG00000130775	22.0517	-0.00761465	0.0689413	0.408831	NA
ENSG00000117748	551.089	0.0450995	0.0711208	0.188461	0.668136
ENSG00000130768	1369.98	-0.0171576	0.0535215	0.620617	0.909781
ENSG00000158156	344.01	0.0268933	0.0672845	0.354532	0.793045
ENSG00000158161	2166.49	0.00402563	0.0500637	0.910851	0.984057
ENSG00000169403	737.443	-0.0246579	0.0619886	0.407901	0.820128
ENSG00000126698	1971.61	0.0392541	0.0600385	0.286837	0.755964
ENSG00000130770	1281.7	-0.027553	0.0595498	0.421919	0.82873
ENSG00000270605	24.1947	0.0172752	0.0714491	0.0866157	NA
ENSG00000130766	1755.88	0.476499	0.0890196	4.55361e-09	1.03319e-06
ENSG00000130772	350.623	0.00913532	0.0623289	0.74279	0.946507
ENSG00000204138	2847.82	0.00297545	0.0487114	0.929929	0.988887
ENSG00000221216	8.15786	0.00416788	0.0689636	0.399896	NA
ENSG00000180198	2981.36	-0.0180553	0.0502414	0.606742	0.905698
ENSG00000242125	2162.55	-0.0772306	0.0724607	0.0772826	0.482325
ENSG00000200087	3394.74	0.00344256	0.0667854	0.842337	0.969101
ENSG00000231468	25.1669	-0.0265101	0.0760007	0.0106861	NA
ENSG00000279443	131.942	0.0208984	0.069725	0.32249	0.773057
ENSG00000180098	471.427	0.0205745	0.0619459	0.513314	0.86829
ENSG00000197989	699.398	0.0302236	0.065308	0.35391	0.792822
ENSG00000221539	9.60594	-0.00829862	0.0694798	0.134753	NA
ENSG00000120656	569.483	-0.0147388	0.0602048	0.636774	0.913672
ENSG00000188060	12.1834	0.00285194	0.0686423	0.699789	NA
ENSG00000229388	17.1442	0.00600251	0.0688539	0.462416	NA
ENSG00000274978	82.3543	-0.0110602	0.0682198	0.489616	0.858673
ENSG00000162419	856.868	-0.0335742	0.0625148	0.338458	0.783017
ENSG00000198492	3427.94	-0.0234393	0.0500405	0.503495	0.864858
ENSG00000159023	2133.98	0.0227727	0.0534635	0.519578	0.871319
ENSG00000253304	13.4505	0.00485116	0.0688995	0.457355	NA
ENSG00000116350	2433.15	0.0258278	0.0521612	0.469245	0.849471
ENSG00000116353	634.732	-0.0440913	0.0708879	0.212288	0.693956
ENSG00000237934	34.304	0.00804317	0.0687797	0.455995	NA
ENSG00000060656	3607.18	-0.116576	0.0866736	0.0244097	0.277762
ENSG00000230523	19.5106	0.000563737	0.0685081	0.944411	NA
ENSG00000162510	11.7189	-0.00928068	0.0695508	0.171997	NA
ENSG00000186056	113.671	0.0220271	0.070478	0.28529	0.75477
ENSG00000162512	1231.41	-0.0326742	0.0580221	0.370132	0.80248
ENSG00000134644	4312.23	-0.0317667	0.0525576	0.377972	0.806841
ENSG00000237329	30.2783	0.00418647	0.0683053	0.693221	NA
ENSG00000084628	12.1875	-0.00268416	0.0686944	0.689983	NA
ENSG00000060688	1342.98	0.0316097	0.0564536	0.379306	0.807402
ENSG00000229447	10.0369	0.00949298	0.0696666	0.119171	NA
ENSG00000121766	804.148	-0.0106512	0.0570125	0.744819	0.946864
ENSG00000229044	7.65226	0.00389634	0.0689328	0.442455	NA
ENSG00000121769	74.5036	0.00779248	0.0673713	0.6433	0.91504
ENSG00000168528	1270.67	0.018869	0.055186	0.584265	0.896933
ENSG00000229167	227.386	-0.011486	0.0654846	0.623382	0.910384
ENSG00000142910	7116.04	-0.0390515	0.0542719	0.297922	0.760203
ENSG00000121764	14.9223	0.00837614	0.0692577	0.287686	NA
ENSG00000162517	2258.22	0.0736996	0.0759042	0.0941293	0.519481
ENSG00000235790	11.0082	0.00488442	0.0688802	0.469014	NA
ENSG00000084636	254.718	0.015789	0.0651613	0.544764	0.882823
ENSG00000121753	472.043	-0.00457552	0.0599395	0.879692	0.977617
ENSG00000269967	16.9269	0.00371049	0.0686386	0.640795	NA
ENSG00000184007	9983.09	-0.039717	0.0544384	0.282428	0.752263
ENSG00000228634	40.7804	0.00890848	0.0686396	0.472233	NA
ENSG00000121774	6210.45	-0.00919429	0.0495438	0.790016	0.958265
ENSG00000203325	51.8647	0.00952917	0.0685117	0.482149	0.856233
ENSG00000121775	2313.63	0.0390623	0.0550765	0.29408	0.759392
ENSG00000025800	12648.8	0.0126297	0.0440778	0.701761	0.934706
ENSG00000084652	11831.3	-0.0599753	0.0549278	0.120074	0.575397
ENSG00000160050	183.847	-0.0138054	0.06731	0.505617	0.86612
ENSG00000224066	25.6698	-0.00634037	0.068622	0.528393	NA
ENSG00000160051	395.675	0.0184335	0.0637997	0.525224	0.873674
ENSG00000222046	79.9632	-0.00117225	0.0670903	0.938306	0.990605
ENSG00000160055	670.662	0.0334986	0.0637936	0.334575	0.780415
ENSG00000084623	11515.6	0.00113138	0.0498571	0.992354	0.998182
ENSG00000220785	291.63	0.00116934	0.0631051	0.964358	0.995351
ENSG00000183615	113.893	-0.0237513	0.0719945	0.209413	0.691653
ENSG00000116478	7389	-0.0342476	0.051478	0.387462	0.811579
ENSG00000175130	12722.2	-0.140482	0.0817019	0.0121111	0.190109
ENSG00000162526	60.2027	0.0132895	0.0690075	0.384779	0.809565
ENSG00000225828	144.058	0.0112051	0.066301	0.604695	0.905299
ENSG00000160058	3523.38	-0.0301739	0.0504819	0.39968	0.817365
ENSG00000160062	455.766	-0.00865964	0.0611575	0.764842	0.951658
ENSG00000176261	749.71	0.00752504	0.0573672	0.815947	0.964268
ENSG00000162521	13176.4	-0.0528361	0.0502701	0.15636	0.62807
ENSG00000162522	17396.2	-0.0564029	0.0576337	0.168695	0.643292
ENSG00000134684	10545.2	0.106226	0.0581658	0.015717	0.219434
ENSG00000116497	1840.78	0.080891	0.0713317	0.0697864	0.4593
ENSG00000160097	80.8184	0.0079511	0.0675415	0.626906	0.911727
ENSG00000121905	23.3316	-0.0141351	0.0704136	0.145903	NA
ENSG00000121900	3969.27	-0.00915113	0.0516752	0.789253	0.958265
ENSG00000116514	1511.71	0.0057816	0.0521663	0.866224	0.974302
ENSG00000236065	60.8486	-0.00782564	0.0678497	0.600871	0.903447
ENSG00000004455	10623.2	0.0635522	0.0585071	0.122645	0.579874
ENSG00000276645	26.9775	0.0101101	0.0692635	0.326412	NA
ENSG00000142920	116.032	0.0258225	0.0720748	0.227242	0.709265
ENSG00000278997	43.5816	-0.00779433	0.0682501	0.556289	NA
ENSG00000116525	750.815	-0.0715612	0.0853486	0.0891995	0.511358
ENSG00000279179	379.135	0.0233851	0.0698978	0.31388	0.769792
ENSG00000160094	3043.78	-0.0893734	0.0702979	0.047803	0.390109
ENSG00000270115	132.46	-0.0295457	0.0750437	0.133722	0.596865
ENSG00000184389	18.5694	-0.00502937	0.0688686	0.469521	NA
ENSG00000225313	328.603	-0.0814112	0.117046	0.0460145	0.38575
ENSG00000134686	5358.62	0.0123381	0.0515934	0.724317	0.94057
ENSG00000222112	28.0132	-0.00663566	0.0687174	0.494686	NA
ENSG00000233246	39.7825	0.00408642	0.0681195	0.71908	NA
ENSG00000121903	476.404	0.0552444	0.0795629	0.136802	0.600763
ENSG00000163866	1543.35	-0.00533682	0.0506854	0.877872	0.977536
ENSG00000189280	691.631	-0.0528039	0.0753536	0.158759	0.629402
ENSG00000189433	43.971	0.000163977	0.0675997	0.992873	NA
ENSG00000188910	1176.46	0.0191705	0.0595168	0.559516	0.888454
ENSG00000187513	27.7416	-0.00460239	0.0684303	0.645092	NA
ENSG00000230163	61.9092	-0.00628541	0.0675454	0.680202	0.927857
ENSG00000116544	16.8277	0.00195782	0.0684627	0.819126	NA
ENSG00000241014	25.1742	0.00610316	0.068796	0.483197	NA
ENSG00000243749	20.2675	-0.00825385	0.0690054	0.387089	NA
ENSG00000163867	688.23	0.0052072	0.0575152	0.871414	0.975074
ENSG00000197056	1379.04	-0.0039993	0.0563438	0.90139	0.982233
ENSG00000116560	17682	0.022475	0.0453093	0.51558	0.869167
ENSG00000146463	8954.72	0.0614117	0.0592537	0.131313	0.593901
ENSG00000240374	9.64097	0.00786288	0.0694704	0.0980343	NA
ENSG00000229994	18.1565	0.0118228	0.0699541	0.158429	NA
ENSG00000227409	15.2394	0.00482774	0.0688672	0.478264	NA
ENSG00000142687	5799.48	-0.0198303	0.0494809	0.571418	0.892259
ENSG00000236274	18.9169	-0.00568004	0.068887	0.447071	NA
ENSG00000020129	4006.33	-0.0250823	0.0571887	0.455118	0.843185
ENSG00000239636	30.6444	0.00112174	0.068125	0.917533	NA
ENSG00000116819	137.578	0.0132045	0.0670368	0.528343	0.874344
ENSG00000126067	9100.2	-0.0360998	0.0515644	0.310174	0.767427
ENSG00000142686	527.21	-0.02518	0.0642932	0.423591	0.829404
ENSG00000092853	2383.37	-0.0275218	0.0558802	0.438677	0.836307
ENSG00000134698	1999.03	0.0244061	0.054168	0.490523	0.858738
ENSG00000092847	8351.27	-0.0119124	0.0480916	0.7395	0.945364
ENSG00000126070	4145.26	0.0422048	0.0544921	0.263043	0.734085
ENSG00000271554	32.1269	0.00125693	0.0680192	0.912756	NA
ENSG00000092850	12.3455	3.2694e-06	0.0686232	0.99821	NA
ENSG00000116863	1606.02	0.0250092	0.0579294	0.473533	0.852599
ENSG00000171812	22.9811	-0.0105388	0.0693948	0.29334	NA
ENSG00000054116	2323.13	-0.0106625	0.0504499	0.758152	0.949972
ENSG00000116871	4654.25	0.00886557	0.0534725	0.793495	0.959488
ENSG00000054118	9393.12	0.0447316	0.0514835	0.232347	0.713964
ENSG00000231849	11.079	0.00196681	0.0686581	0.773188	NA
ENSG00000214193	1161.76	-0.0585859	0.0743878	0.139168	0.602502
ENSG00000142694	305.395	-0.0214018	0.0663425	0.432662	0.834078
ENSG00000116883	296.621	-0.0489826	0.0825531	0.123133	0.580213
ENSG00000196182	4165.6	0.0708172	0.0771269	0.103463	0.538689
ENSG00000181817	621.608	0.0207869	0.060601	0.523371	0.873256
ENSG00000116885	156.027	0.0600072	0.102397	0.0376931	0.349964
ENSG00000116898	3564.58	0.00889513	0.046311	0.789159	0.958265
ENSG00000119535	650.152	-0.0103006	0.0684455	0.475548	0.854081
ENSG00000233621	165.436	0.0275146	0.0712374	0.264056	0.735032
ENSG00000163874	1438.39	-0.0130572	0.0525641	0.702229	0.934795
ENSG00000163875	3550.13	0.026709	0.0518232	0.465847	0.848051
ENSG00000263675	28.9613	0.000772575	0.0682821	0.937482	NA
ENSG00000163877	1276.86	0.0833989	0.0816969	0.0667174	0.45167
ENSG00000232273	17.7127	0.00185227	0.0684745	0.826233	NA
ENSG00000163879	60.2464	-0.016787	0.0705356	0.219426	0.700579
ENSG00000134697	4561.66	0.0742816	0.0652976	0.0806485	0.49074
ENSG00000116922	2253.16	0.0562049	0.0589377	0.155094	0.625682
ENSG00000134690	4035.05	-0.0125047	0.0526141	0.716119	0.937833
ENSG00000183317	493.759	0.000960418	0.0594142	0.975468	0.99722
ENSG00000185090	2984.23	-0.0566611	0.0616042	0.154874	0.625495
ENSG00000196449	1565.54	0.0765169	0.0768135	0.0840259	0.497329
ENSG00000197982	3233.18	-0.0767389	0.0717768	0.0769812	0.482236
ENSG00000188786	4358.08	0.0363388	0.0541342	0.323085	0.773057
ENSG00000235673	16.2166	0.00306924	0.0685514	0.711558	NA
ENSG00000204084	1601.36	0.0111483	0.0524235	0.7472	0.947743
ENSG00000252448	11.6002	-0.000119566	0.0685862	0.984478	NA
ENSG00000183431	8617.1	0.00925847	0.0474854	0.788451	0.958209
ENSG00000212541	35.0514	-0.0232134	0.0737245	0.0577009	NA
ENSG00000183386	1231.7	0.059464	0.0784624	0.128247	0.589049
ENSG00000183520	1996.87	0.0245887	0.0519742	0.487435	0.858039
ENSG00000116954	1471.35	-0.00405591	0.0544391	0.880454	0.977816
ENSG00000228436	54.8746	-0.00285746	0.0673406	0.845578	0.969843
ENSG00000214114	2297.81	0.0124101	0.0525609	0.685588	0.929529
ENSG00000274944	22.5941	-0.0154517	0.0707998	0.122112	NA
ENSG00000131233	16.5033	0.00438032	0.0688	0.533443	NA
ENSG00000158315	854.4	-0.0317648	0.064758	0.335156	0.780433
ENSG00000174574	4041.3	0.0595948	0.0569798	0.13563	0.599137
ENSG00000168653	3337	-0.174508	0.0942251	0.00462093	0.107889
ENSG00000127603	29398.5	-0.015866	0.0430724	0.62546	0.911204
ENSG00000183682	158.542	0.00683749	0.0655085	0.747116	0.947743
ENSG00000237624	12.3044	0.000456766	0.068645	0.946173	NA
ENSG00000182109	276.723	0.0020955	0.0626693	0.937913	0.990544
ENSG00000243970	91.6919	-0.038693	0.0831042	0.0334877	0.331665
ENSG00000090621	21217	-0.111441	0.0522578	0.0066778	0.133853
ENSG00000228060	119.2	0.00245674	0.0673692	0.868282	0.974818
ENSG00000201457	108.334	-0.000838794	0.066184	0.962609	0.995351
ENSG00000084072	3968.81	-0.0402817	0.055293	0.278118	0.748261
ENSG00000116985	1431.58	-0.0227556	0.0574315	0.489595	0.858673
ENSG00000198754	30.8566	-0.00927919	0.0689963	0.390352	NA
ENSG00000261798	56.2898	-0.0116817	0.0687965	0.416565	0.824941
ENSG00000043514	1187.82	0.356158	0.0986644	1.63384e-05	0.00156838
ENSG00000202222	10.6014	0.0032114	0.0688355	0.566599	NA
ENSG00000116990	44.1822	0.0260779	0.0755916	0.0190964	NA
ENSG00000168389	603.111	-0.0496359	0.0741354	0.173789	0.649673
ENSG00000228477	24.8509	-0.0123872	0.06997	0.183051	NA
ENSG00000131236	17636	-0.00286334	0.0457483	0.964956	0.995351
ENSG00000131238	14294.4	-0.0365494	0.0549131	0.3563	0.793954
ENSG00000226745	646.736	-0.250635	0.133274	0.00281432	0.0783353
ENSG00000117000	4787.51	0.069972	0.071008	0.10235	0.537139
ENSG00000259943	354.393	-0.0695252	0.0960889	0.0772221	0.482236
ENSG00000084073	8435.84	-0.0179673	0.0503468	0.585083	0.897207
ENSG00000231296	36.3718	-0.00163397	0.0681441	0.869755	NA
ENSG00000049089	535.462	-0.269725	0.131104	0.00184742	0.0588771
ENSG00000084070	2552.62	0.0631003	0.0632219	0.117178	0.570074
ENSG00000187801	450.107	0.103147	0.12296	0.0381203	0.35234
ENSG00000260920	709.644	-0.0140528	0.0594287	0.654992	0.920036
ENSG00000279667	57.5594	0.00190805	0.067572	0.890225	0.979868
ENSG00000187815	520.582	-0.018052	0.0620318	0.557162	0.888078
ENSG00000238287	29.9733	0.00362952	0.0683132	0.724634	NA
ENSG00000164002	1188.81	-0.00458853	0.0551527	0.888218	0.979868
ENSG00000238186	56.8016	0.00913148	0.0684282	0.502011	0.863826
ENSG00000117010	155.028	-0.0195239	0.0688988	0.361108	0.797983
ENSG00000117016	2799.64	-0.0103366	0.0527594	0.752732	0.948915
ENSG00000237899	11.7057	-0.00754155	0.0692272	0.26906	NA
ENSG00000272145	238.08	-0.0261109	0.070517	0.283763	0.753286
ENSG00000066136	6548.97	0.187057	0.0683154	0.000583523	0.0257007
ENSG00000198974	22.9947	-0.0116846	0.0697865	0.20918	NA
ENSG00000207962	10.7932	0.00286068	0.0687556	0.648054	NA
ENSG00000117013	258.577	0.0195073	0.0663843	0.452492	0.841435
ENSG00000179862	2933.73	0.00773094	0.0495461	0.824669	0.966775
ENSG00000171793	6863.1	0.000468823	0.0451694	0.976503	0.99722
ENSG00000281207	588.794	0.0292651	0.0676426	0.33433	0.780386
ENSG00000171790	390.476	0.00743214	0.065183	0.727667	0.941506
ENSG00000010803	5448.34	-0.00164741	0.0454484	0.974211	0.996855
ENSG00000235358	62.5102	-0.00229814	0.0677466	0.856573	0.971953
ENSG00000213987	10.3425	-0.00463456	0.0688823	0.468701	NA
ENSG00000204060	1374.6	-0.0993332	0.0910032	0.0425071	0.370332
ENSG00000229901	60.6945	-0.00391569	0.0676832	0.77332	0.954477
ENSG00000127129	451.51	0.0206561	0.0631637	0.502584	0.864185
ENSG00000127124	2906.11	0.11446	0.0878502	0.0265974	0.292435
ENSG00000230638	101.282	0.0263916	0.0735846	0.155383	0.626174
ENSG00000198815	4423.11	0.0461235	0.057336	0.210135	0.692119
ENSG00000227527	11.5277	-0.00180156	0.0686184	0.797044	NA
ENSG00000177181	81.4086	-0.00481501	0.067427	0.747844	0.947831
ENSG00000066185	19.4414	0.00153039	0.0684051	0.863409	NA
ENSG00000127125	1933.48	-0.0111994	0.050743	0.707853	0.935949
ENSG00000186409	230.857	0.000337069	0.0641606	0.989325	0.998182
ENSG00000171960	1391.67	0.000189536	0.0524217	0.99889	0.999581
ENSG00000234917	19.7221	-0.0042206	0.0686418	0.607385	NA
ENSG00000065978	23083	-0.0475956	0.0563811	0.26446	0.735032
ENSG00000117385	1894.96	-0.0223427	0.0513697	0.527741	0.873927
ENSG00000164008	84.1998	-0.00489931	0.0670661	0.765224	0.951658
ENSG00000228452	54.3424	0.00293789	0.0676315	0.830435	0.967312
ENSG00000274386	58.6201	0.0385521	0.0834436	0.0247769	0.280449
ENSG00000177868	193.739	-0.020056	0.067986	0.401364	0.818191
ENSG00000164010	1088.87	-0.0480493	0.0654377	0.209783	0.692114
ENSG00000228192	57.7206	-0.0424116	0.0870593	0.017892	0.237165
ENSG00000164011	449.414	0.0163138	0.0614025	0.609006	0.906744
ENSG00000117394	13794.6	-0.0957349	0.0552659	0.0198291	0.248843
ENSG00000227533	91.5369	-0.00126999	0.0663115	0.942973	0.990915
ENSG00000186973	28.6661	-0.00993471	0.0692391	0.328838	NA
ENSG00000117395	2948.78	0.00159992	0.0523805	0.979918	0.997562
ENSG00000243710	36.2216	-0.00144147	0.0679516	0.89988	NA
ENSG00000179178	2580.83	-0.0466727	0.0591021	0.224358	0.706425
ENSG00000253313	765.947	0.00541172	0.059749	0.854189	0.971863
ENSG00000117400	26.0228	-0.00981817	0.0691125	0.362262	NA
ENSG00000234694	24.6225	-0.0121101	0.0699228	0.183869	NA
ENSG00000117399	7335.24	-0.0430174	0.0646858	0.223277	0.705932
ENSG00000066322	5806.99	-0.0780528	0.0582376	0.0600477	0.42963
ENSG00000159479	2233.83	0.0433366	0.0597316	0.249858	0.725543
ENSG00000229431	72.8427	0.0191543	0.0707434	0.242373	0.720474
ENSG00000198198	6124.38	0.0140196	0.0477877	0.779259	0.956191
ENSG00000229372	6.52462	-0.00243518	0.0688419	0.616753	NA
ENSG00000178922	453.177	0.014256	0.0605709	0.643882	0.915334
ENSG00000142949	67837	-0.106412	0.0520213	0.0106217	0.176537
ENSG00000066135	4265.64	-0.00247536	0.0452708	0.942261	0.990666
ENSG00000236200	121.9	0.00911943	0.0672607	0.606149	0.905622
ENSG00000126091	1160.18	0.0545941	0.0700145	0.162734	0.635416
ENSG00000229444	14.1271	0.0136929	0.070552	0.0796393	NA
ENSG00000233674	8.25345	0.012547	0.0704813	0.0184295	NA
ENSG00000283477	14.9448	-0.00608806	0.0688643	0.453851	NA
ENSG00000224751	49.7352	-0.00855207	0.068212	0.541172	0.881734
ENSG00000117407	1050.66	-0.040097	0.067018	0.257525	0.730246
ENSG00000237950	26.3284	-0.00295839	0.0683617	0.756152	NA
ENSG00000117408	4123.91	-0.0631177	0.0579986	0.118553	0.571948
ENSG00000132768	3266.32	-0.0110813	0.0503552	0.7502	0.947831
ENSG00000117410	3947.92	-0.075773	0.0695752	0.0795378	0.488108
ENSG00000117411	4118.43	-0.00228449	0.0530854	0.932312	0.989084
ENSG00000159214	486.208	-0.00834676	0.0608728	0.777568	0.955529
ENSG00000196517	9747.55	-0.0328685	0.051074	0.366674	0.79973
ENSG00000230615	57.6462	-0.0104757	0.0683618	0.483639	0.856233
ENSG00000171872	8.69379	0.00341825	0.068824	0.565163	NA
ENSG00000178028	1909.35	-0.0408448	0.0585321	0.275319	0.746395
ENSG00000117419	2355.14	-0.0388987	0.0582514	0.294104	0.759392
ENSG00000233602	44.8125	0.00431808	0.0680311	0.724497	NA
ENSG00000187147	2188.13	-0.0519677	0.0646862	0.183228	0.659735
ENSG00000126106	600.594	0.00799757	0.0578308	0.799129	0.959626
ENSG00000198520	40.4156	0.000437248	0.0678099	0.97314	NA
ENSG00000199377	44.087	0.0189162	0.0714473	0.157627	NA
ENSG00000200169	40.7498	-0.00136734	0.0677869	0.911276	NA
ENSG00000142945	3922.03	-0.0613901	0.0677077	0.129018	0.589715
ENSG00000225721	42.6248	0.00612061	0.0680444	0.640947	NA
ENSG00000142937	12508	-0.00693158	0.0516688	0.720658	0.939216
ENSG00000200913	131.017	0.00568078	0.0660294	0.778382	0.95591
ENSG00000234093	53.5476	-0.0205827	0.0721025	0.131285	0.593901
ENSG00000142959	18.3947	0.00784346	0.0690753	0.359869	NA
ENSG00000173846	599.218	0.0654697	0.0830979	0.104986	0.541565
ENSG00000188396	22.1585	0.000676367	0.0683905	0.940285	NA
ENSG00000222009	114.65	0.0162323	0.0687369	0.392594	0.815325
ENSG00000117425	77.0618	0.00360608	0.0667749	0.83443	0.967699
ENSG00000226499	14.9389	0.0143545	0.0707091	0.0793597	NA
ENSG00000070785	1198.38	0.0426597	0.0628189	0.25552	0.729119
ENSG00000229815	13.0566	0.00621031	0.0690158	0.373093	NA
ENSG00000232369	7.59971	-0.00353364	0.0688767	0.51023	NA
ENSG00000268949	19.8446	-0.00915334	0.0692244	0.319526	NA
ENSG00000126107	2627.78	-0.0566862	0.0674365	0.153497	0.623776
ENSG00000126088	1706.68	-0.0515983	0.0606964	0.185156	0.662852
ENSG00000162415	1121.86	0.0460609	0.0635148	0.218508	0.699679
ENSG00000281912	39.3548	0.00803037	0.0683792	0.533816	NA
ENSG00000186603	115.492	-0.022743	0.0720492	0.189386	0.669268
ENSG00000132781	642.468	-0.0822353	0.0905028	0.0671158	0.453342
ENSG00000132773	1207.08	0.0163519	0.0557697	0.631339	0.91293
ENSG00000070759	388.238	0.0210935	0.0637322	0.48347	0.856233
ENSG00000280670	132.384	0.012979	0.067837	0.490997	0.858762
ENSG00000132763	615.817	0.00483195	0.0587106	0.881577	0.97796
ENSG00000117450	8490	-0.0552071	0.0577295	0.157597	0.6285
ENSG00000117448	1834.7	-0.207544	0.0866567	0.00122076	0.0430139
ENSG00000132780	2644.94	-0.0819887	0.0829361	0.0687695	0.457728
ENSG00000159588	51.3762	0.010261	0.0684268	0.482909	0.856233
ENSG00000159592	5098.14	-0.0106899	0.0461655	0.755817	0.949276
ENSG00000225447	19.2794	0.0203605	0.0729863	0.0181053	NA
ENSG00000234329	34.2182	-0.0277886	0.0764867	0.0195921	NA
ENSG00000159596	487.866	-0.0220197	0.0630602	0.478935	0.855305
ENSG00000197429	465.122	0.00898864	0.0620973	0.749449	0.947831
ENSG00000230896	43.0216	-0.00487986	0.0680004	0.696702	NA
ENSG00000236111	44.1272	0.020202	0.0720055	0.13069	NA
ENSG00000086015	16267.2	-0.00463982	0.0434868	0.897211	0.981614
ENSG00000232467	25.7051	0.0142336	0.070468	0.13797	NA
ENSG00000117461	7632.83	0.0406908	0.0530741	0.2721	0.742744
ENSG00000226957	39.4806	-0.00476381	0.0679765	0.705761	NA
ENSG00000233114	14.242	0.00746353	0.0691774	0.300437	NA
ENSG00000227857	8.92205	0.0082	0.0694166	0.178473	NA
ENSG00000117472	2284.25	-0.0430919	0.0616259	0.253646	0.727858
ENSG00000085998	3929.11	-0.00285744	0.0477997	0.933213	0.989301
ENSG00000085999	1660.07	-0.0100862	0.0560883	0.760021	0.950843
ENSG00000132128	5397.59	-0.0233411	0.0492408	0.510092	0.867278
ENSG00000173660	3729.71	-0.090924	0.0975508	0.0525511	0.406773
ENSG00000117481	3018.79	-0.00209944	0.0478947	0.950771	0.991996
ENSG00000225779	20.2163	0.00371408	0.0686825	0.623584	NA
ENSG00000117480	2963.45	-0.0498444	0.0612538	0.19585	0.676554
ENSG00000232022	17.4866	-0.0106485	0.0697212	0.179125	NA
ENSG00000197587	102.469	-0.000320963	0.0669515	0.982427	0.997958
ENSG00000269956	37.0687	0.00108691	0.068044	0.923596	NA
ENSG00000079277	1422.8	0.00531184	0.051389	0.877016	0.977385
ENSG00000142961	1181.71	-0.0299355	0.057655	0.405406	0.819087
ENSG00000123472	1829.17	0.0156666	0.0523611	0.651658	0.919219
ENSG00000233647	13.224	0.0056332	0.069044	0.340158	NA
ENSG00000186118	22.749	-0.00184002	0.0684627	0.82498	NA
ENSG00000228237	25.3816	0.0177858	0.071656	0.0767761	NA
ENSG00000159658	9580.91	-0.0626128	0.0527486	0.104845	0.54121
ENSG00000142973	1130.12	-0.385376	0.11138	2.65587e-05	0.00230148
ENSG00000154198	221.131	-0.0322677	0.075781	0.145341	0.613266
ENSG00000238145	29.0993	-0.00458952	0.0685599	0.613016	NA
ENSG00000187048	28.8304	0.00568949	0.0685156	0.580617	NA
ENSG00000186377	3044.02	-0.105835	0.111264	0.0388525	0.355851
ENSG00000186160	1239.24	-0.0237684	0.0729114	0.143223	0.608789
ENSG00000225154	48.096	-0.00404627	0.0681624	0.718377	0.938552
ENSG00000225506	55.1355	-0.0143915	0.0694834	0.32651	0.775383
ENSG00000162365	102.106	-0.0265468	0.0741997	0.121743	0.578863
ENSG00000224805	40.7446	-0.00809956	0.0685714	0.497164	NA
ENSG00000162366	1738.51	0.0343368	0.062533	0.327892	0.776874
ENSG00000123473	4349.34	-0.00150775	0.0497597	0.966834	0.995439
ENSG00000162368	7090.48	-0.00726671	0.0494837	0.833162	0.967489
ENSG00000225762	50.6528	-0.00113816	0.0673434	0.936791	0.99022
ENSG00000237424	327.739	-0.0295074	0.0711962	0.265502	0.736142
ENSG00000186564	301.685	-0.0352982	0.0744501	0.198626	0.679919
ENSG00000269113	59.6678	-0.000641125	0.0674025	0.962463	0.995351
ENSG00000132122	22.8692	0.00667839	0.0687609	0.484328	NA
ENSG00000185104	4444.4	0.00306013	0.0469857	0.833462	0.967661
ENSG00000225767	44.6775	0.0108259	0.0691464	0.362111	NA
ENSG00000230585	42.6991	-0.0152561	0.0704858	0.180174	NA
ENSG00000123080	1081.63	-0.127877	0.109278	0.0228706	0.269675
ENSG00000123091	5699.94	0.0316056	0.0556748	0.36129	0.797983
ENSG00000233406	28.2982	0.00377521	0.0684554	0.688761	NA
ENSG00000085831	3121.42	-0.010341	0.0516071	0.763316	0.951658
ENSG00000261664	122.816	-0.00706407	0.0665385	0.709108	0.936278
ENSG00000085832	4701.97	-0.00294692	0.0486747	0.931773	0.988964
ENSG00000232027	22.7784	0.00736145	0.0688713	0.437154	NA
ENSG00000238140	10.8297	0.0100136	0.0697698	0.104718	NA
ENSG00000227070	61.3416	0.00668249	0.067549	0.668162	0.925657
ENSG00000252032	12.8716	0.00180343	0.0686355	0.796012	NA
ENSG00000227742	77.1479	0.018926	0.0705302	0.261013	0.732508
ENSG00000117859	6539.36	0.000112639	0.0511568	0.771788	0.954395
ENSG00000232846	11.1068	-0.00245975	0.0687581	0.676886	NA
ENSG00000078618	9579.51	0.0147766	0.0439063	0.663255	0.924286
ENSG00000266993	95.3491	0.00631304	0.0671044	0.710529	0.936902
ENSG00000230604	17.9693	-0.00438769	0.0686132	0.607683	NA
ENSG00000169213	79.5954	0.0104086	0.0680007	0.524487	0.873674
ENSG00000117862	3720.52	0.0232447	0.0509071	0.556122	0.887655
ENSG00000198841	468.645	0.0681069	0.0942885	0.102139	0.536678
ENSG00000223390	27.8308	0.0135521	0.07018	0.180884	NA
ENSG00000228369	33.8817	-0.00144677	0.0681312	0.89029	NA
ENSG00000134717	4121.19	0.0583899	0.0569246	0.139444	0.602502
ENSG00000157077	2407.21	-0.0104574	0.0511647	0.761683	0.951639
ENSG00000228407	11.0761	0.00393023	0.068767	0.571733	NA
ENSG00000223429	14.8717	0.00781297	0.0692221	0.286011	NA
ENSG00000154222	2699.64	-0.0425769	0.0543658	0.258077	0.730246
ENSG00000272100	27.5697	0.00331867	0.0683943	0.729134	NA
ENSG00000224680	13.756	-0.00758139	0.0691115	0.337424	NA
ENSG00000085840	1333.19	0.187479	0.0913178	0.00309858	0.0828595
ENSG00000134748	3535.6	0.00825265	0.0497921	0.810805	0.963855
ENSG00000134744	3722.52	0.0264319	0.0512525	0.461454	0.845918
ENSG00000162377	2396.79	-0.0138772	0.0534379	0.714863	0.937706
ENSG00000162378	2958.78	0.0461271	0.0622117	0.227394	0.709571
ENSG00000203995	1166.17	0.209003	0.0913251	0.00156999	0.0524789
ENSG00000242391	12.875	0.00103467	0.0685581	0.891087	NA
ENSG00000121310	2517.58	-0.02481	0.054518	0.483366	0.856233
ENSG00000230953	98.4866	0.00600112	0.0670166	0.727069	0.941436
ENSG00000116171	2819.79	-0.0169162	0.0544349	0.623902	0.910489
ENSG00000236360	9.18897	-0.0102222	0.0698404	0.0840696	NA
ENSG00000226147	13.5433	0.000208173	0.0686595	0.976052	NA
ENSG00000157184	1806.63	0.025214	0.0544452	0.463221	0.846253
ENSG00000236723	19.6826	0.00348597	0.0685056	0.694999	NA
ENSG00000162384	948.971	-0.0201307	0.0572399	0.555006	0.886838
ENSG00000259818	18.4277	0.0192286	0.0724745	0.0261858	NA
ENSG00000162385	1279.97	0.00832638	0.0568282	0.799185	0.959626
ENSG00000226754	48.0373	-0.0108566	0.0686344	0.441069	0.836743
ENSG00000157193	5704.14	-0.0725778	0.0554438	0.0705796	0.461945
ENSG00000234578	11.0993	-0.0011558	0.0686817	0.850679	NA
ENSG00000228838	42.2434	-0.00743166	0.0683492	0.551658	NA
ENSG00000225030	14.7204	-0.0006196	0.0684739	0.936208	NA
ENSG00000232762	58.8507	-0.0136187	0.0693878	0.334825	0.780433
ENSG00000225675	9.47156	0.00521986	0.0689854	0.385892	NA
ENSG00000058804	5259.4	-0.0108331	0.0517841	0.758316	0.950033
ENSG00000058799	2622.29	-0.04825	0.0575099	0.199146	0.680518
ENSG00000211452	22.1746	-0.000653501	0.0682821	0.943428	NA
ENSG00000081870	772.904	-0.0410036	0.0665873	0.253523	0.727858
ENSG00000116212	1339.28	0.0207012	0.0570835	0.53713	0.878881
ENSG00000203985	13.7333	-0.00285494	0.0686946	0.675744	NA
ENSG00000116209	6235.09	-0.0196535	0.0479868	0.579746	0.895288
ENSG00000280378	33.5147	-0.00271358	0.0682327	0.790985	NA
ENSG00000116205	842.47	0.0231799	0.0608741	0.480526	0.855531
ENSG00000215883	909.863	-0.0700917	0.0847328	0.0934893	0.518904
ENSG00000116221	4966.43	-0.0179667	0.0509354	0.607862	0.906376
ENSG00000157216	3768.1	-0.0489261	0.0536979	0.192312	0.672555
ENSG00000198711	79.5074	0.0136538	0.0689049	0.395798	0.816364
ENSG00000162390	198.806	-0.0121012	0.0658016	0.599783	0.903447
ENSG00000162391	10.5271	0.0066042	0.0690994	0.324511	NA
ENSG00000243725	345.865	0.0260812	0.0663195	0.384807	0.809565
ENSG00000162396	637.713	0.0278867	0.061358	0.410937	0.821655
ENSG00000006555	700.948	-0.0171862	0.0598393	0.58841	0.899062
ENSG00000162398	45.2828	-0.00981416	0.0685014	0.477385	NA
ENSG00000116133	74265.3	-0.103404	0.0580355	0.0165555	0.227657
ENSG00000242396	64.7582	-0.0232095	0.0729353	0.129186	0.589987
ENSG00000233203	35.5249	-0.000486017	0.0677816	0.966913	NA
ENSG00000143001	50.1083	0.00300289	0.0675582	0.831154	0.967442
ENSG00000162399	70.9993	-0.0135041	0.0690719	0.374798	0.80461
ENSG00000169174	3957.53	-0.301394	0.0800799	1.02144e-05	0.00102658
ENSG00000162402	11571.2	0.0416077	0.0474373	0.243214	0.720693
ENSG00000234810	8.93767	0.00578255	0.069052	0.336976	NA
ENSG00000260971	70.9271	0.0252809	0.0734672	0.142116	0.606673
ENSG00000223956	19.8009	-0.00072611	0.0684301	0.929293	NA
ENSG00000162407	4077.05	0.0121683	0.0536033	0.721338	0.939333
ENSG00000162409	1801.49	0.0617812	0.0683992	0.129628	0.590854
ENSG00000187889	39.5122	0.000823573	0.0677607	0.949563	NA
ENSG00000162600	1449.29	-0.0556407	0.0701647	0.156584	0.628075
ENSG00000184292	31550	-0.233161	0.060654	9.70018e-06	0.000981488
ENSG00000185839	16.6599	-0.0122431	0.0700495	0.14846	NA
ENSG00000162601	2834.68	0.185911	0.0801101	0.00174272	0.0566101
ENSG00000283445	105.73	-0.0308344	0.0758812	0.121908	0.578863
ENSG00000177606	2445	0.0391331	0.0625939	0.276975	0.747054
ENSG00000234807	17.4949	-0.000308159	0.0684565	0.968033	NA
ENSG00000232453	42.9149	-0.00589478	0.0682801	0.613859	NA
ENSG00000172456	366.064	-0.0101386	0.0626806	0.713148	0.937672
ENSG00000134709	2485.16	-0.00448647	0.048065	0.895824	0.981345
ENSG00000134716	361.573	-0.0270945	0.0676308	0.349744	0.790143
ENSG00000226476	21.9534	1.34744	0.667033	0.0010795	NA
ENSG00000162599	6359.39	-0.0520138	0.0564122	0.178486	0.655178
ENSG00000270742	24.9392	0.00597521	0.068714	0.515638	NA
ENSG00000237853	26.5674	0.000991219	0.0682731	0.919766	NA
ENSG00000162604	777.257	-0.00810583	0.0565151	0.80461	0.962424
ENSG00000271200	15.0417	-0.000879769	0.0685289	0.906426	NA
ENSG00000132849	12763.6	0.0389716	0.0574663	0.318266	0.771253
ENSG00000200575	9.76324	-0.00392123	0.0687896	0.556209	NA
ENSG00000236646	16.2445	0.00595522	0.0689253	0.426509	NA
ENSG00000132854	42.7365	0.668014	0.520138	0.00355003	NA
ENSG00000162607	4717.2	0.0124944	0.045634	0.716994	0.938196
ENSG00000116641	3586.7	0.042045	0.056411	0.268118	0.739286
ENSG00000132855	26.7929	0.00908127	0.0691109	0.359684	NA
ENSG00000278967	16.0327	0.0105853	0.0697375	0.168321	NA
ENSG00000125703	431.649	0.0478331	0.0830346	0.115044	0.56541
ENSG00000230798	51.1815	-0.0103373	0.0687377	0.436718	0.835123
ENSG00000187140	24.8966	0.0129655	0.0701688	0.154298	NA
ENSG00000088035	1315.98	-0.0333241	0.0624897	0.342478	0.785113
ENSG00000142856	1042.56	-0.0241148	0.0609827	0.462383	0.845918
ENSG00000203965	375.999	-0.0429039	0.0765665	0.173468	0.649422
ENSG00000116652	46.9128	0.0114683	0.0689092	0.404906	NA
ENSG00000079739	4464.49	-0.0114425	0.0486471	0.74259	0.946488
ENSG00000244256	27.2602	0.0145589	0.070614	0.11841	NA
ENSG00000185483	3801.63	-0.0427595	0.0577318	0.269194	0.740073
ENSG00000177452	29.6023	-0.001885	0.0683742	0.833693	NA
ENSG00000228056	36.6285	0.00311756	0.0682356	0.766992	NA
ENSG00000223949	55.7834	0.0301239	0.077199	0.0467007	0.38819
ENSG00000158966	1087.46	0.00895037	0.057454	0.776812	0.955393
ENSG00000162437	1979.47	0.0533995	0.0631207	0.176179	0.651911
ENSG00000162434	8767.21	0.132353	0.079981	0.0124794	0.193585
ENSG00000233877	15.0204	0.00128422	0.068512	0.872348	NA
ENSG00000226891	28.7545	-0.00224931	0.0683136	0.813708	NA
ENSG00000162433	16690.5	-0.0718181	0.0597964	0.0835867	0.496711
ENSG00000231622	12.8955	-0.00107234	0.0685665	0.882083	NA
ENSG00000116675	3437.15	0.39529	0.070972	1.50164e-09	3.68641e-07
ENSG00000229294	29.4557	0.00564997	0.0683259	0.619546	NA
ENSG00000213625	5025.22	0.0329373	0.0503381	0.363457	0.798637
ENSG00000116678	655.822	0.0122824	0.0608436	0.682852	0.928728
ENSG00000184588	553.179	0.297398	0.128901	0.00098361	0.0367321
ENSG00000152763	194.536	0.0388197	0.0801881	0.100844	0.533429
ENSG00000198160	2565.24	0.0573124	0.0615179	0.150651	0.61978
ENSG00000116704	1821.43	0.0141707	0.0547151	0.674029	0.926479
ENSG00000081985	32.6441	0.0086646	0.0688074	0.441515	NA
ENSG00000142864	16104.7	-0.0113498	0.0449807	0.747207	0.947743
ENSG00000223263	36.3117	0.00217334	0.0679613	0.854912	NA
ENSG00000116717	1740.34	1.08933	0.102543	1.13775e-27	2.12973e-24
ENSG00000172380	6361.42	0.0303376	0.0534751	0.411785	0.821979
ENSG00000238778	8.82158	0.0089535	0.0696338	0.0878742	NA
ENSG00000232284	165.993	0.0164151	0.0685283	0.403993	0.818863
ENSG00000162595	248.72	-0.0377985	0.0743453	0.199354	0.680518
ENSG00000116729	6741.48	0.0349585	0.0549692	0.349066	0.790094
ENSG00000234383	65.8255	-0.00608045	0.0677344	0.672246	0.926422
ENSG00000024526	3471.22	-0.0119713	0.0536519	0.725299	0.940683
ENSG00000233589	88.129	0.0112049	0.06836	0.475218	0.853694
ENSG00000234264	11.6088	0.0026478	0.0686687	0.706739	NA
ENSG00000033122	37.6391	0.0111584	0.0691938	0.353469	NA
ENSG00000066557	1048.12	0.0143408	0.0575092	0.664229	0.924489
ENSG00000116754	8864.37	-5.79908e-05	0.0455671	0.977731	0.99722
ENSG00000228988	10.1268	6.14786e-05	0.0686405	0.994296	NA
ENSG00000118454	2614	0.097097	0.0682851	0.033968	0.333555
ENSG00000197568	735.648	-0.0275452	0.0624414	0.404573	0.818863
ENSG00000226088	15.1942	0.0148266	0.0709469	0.0488942	NA
ENSG00000116761	769.967	0.78251	0.121764	6.38842e-12	2.58558e-09
ENSG00000271992	14.1824	0.0103446	0.0697175	0.162178	NA
ENSG00000050628	30.6953	0.0187057	0.071952	0.0742417	NA
ENSG00000235079	25.7089	-0.0185578	0.0719196	0.0715319	NA
ENSG00000132485	3891.74	0.0251084	0.052974	0.487773	0.858078
ENSG00000207721	15.9049	-0.00649702	0.0689295	0.417846	NA
ENSG00000229956	12.7064	0.00237353	0.0686724	0.729375	NA
ENSG00000162620	76.6682	0.00643463	0.0680005	0.638545	0.914082
ENSG00000254685	560.755	0.0119169	0.061451	0.686785	0.929839
ENSG00000116791	884.978	-0.0305307	0.059598	0.386602	0.810817
ENSG00000162623	835.354	-0.0577546	0.0744488	0.139798	0.60254
ENSG00000178193	9.50345	0.0104469	0.0698424	0.103823	NA
ENSG00000117054	1908.81	-0.0722356	0.0685033	0.0901407	0.511358
ENSG00000181227	80.3082	0.0118547	0.067941	0.502423	0.864108
ENSG00000137955	2449.22	0.0134347	0.0492981	0.753871	0.949164
ENSG00000057468	32.848	-0.00716567	0.068544	0.525154	NA
ENSG00000117069	3643.02	0.0102286	0.0519436	0.769702	0.953482
ENSG00000230498	303.033	0.0159115	0.0646183	0.553622	0.886252
ENSG00000142892	1683.96	-0.00933529	0.0550151	0.776715	0.955393
ENSG00000226084	21.3072	-0.0111238	0.0696537	0.229543	NA
ENSG00000228187	12.6925	-0.00248642	0.0687035	0.702479	NA
ENSG00000154027	333.487	0.00546664	0.0621866	0.840829	0.969101
ENSG00000036549	4611.91	0.0388541	0.0557334	0.300537	0.762195
ENSG00000243437	10.138	-0.00599883	0.0690893	0.307392	NA
ENSG00000077254	4548.55	0.026855	0.0548597	0.450042	0.840726
ENSG00000180488	1254.69	0.0157088	0.0551332	0.645598	0.916166
ENSG00000219201	13.0484	0.00334103	0.0686926	0.643822	NA
ENSG00000235927	9.73566	0.00105285	0.068759	0.845207	NA
ENSG00000162614	98.045	0.00495684	0.0667307	0.780134	0.956191
ENSG00000162613	6939.69	-0.0361696	0.0483676	0.31648	0.770413
ENSG00000162616	507.915	-0.0222096	0.0647661	0.448628	0.840195
ENSG00000273338	16.7062	-0.00518668	0.0686786	0.550679	NA
ENSG00000122420	13.3547	-0.00554354	0.0688411	0.473562	NA
ENSG00000137965	85.4025	-0.00355931	0.0669211	0.829117	0.967078
ENSG00000162618	9.07262	0.00292428	0.0687942	0.620339	NA
ENSG00000117114	5624.32	-0.0186351	0.0497879	0.595602	0.901477
ENSG00000215875	16.0059	-0.000431927	0.0684283	0.95733	NA
ENSG00000233008	37.9512	-0.00337528	0.0682239	0.754386	NA
ENSG00000137941	1639.48	0.00841209	0.0519359	0.806781	0.963083
ENSG00000233061	50.2578	-0.0172997	0.0709969	0.165182	0.638679
ENSG00000271576	55.7203	-0.0143934	0.0695476	0.31776	0.771253
ENSG00000142875	2786.56	0.0610295	0.0637155	0.136035	0.599155
ENSG00000213540	20.0928	0.00122402	0.0684508	0.885592	NA
ENSG00000203943	16.3952	0.0190962	0.0724629	0.0219611	NA
ENSG00000117133	1348.27	0.0226922	0.0583911	0.47418	0.853058
ENSG00000174021	6031.22	0.00393318	0.0478944	0.910584	0.984057
ENSG00000122432	54.1472	-0.0011597	0.0676376	0.92901	0.988578
ENSG00000117151	940.63	-0.0187546	0.0606045	0.556127	0.887655
ENSG00000117155	2924.93	0.00554689	0.0476742	0.83111	0.967442
ENSG00000171517	482.706	-0.21977	0.175044	0.00781066	0.147125
ENSG00000153898	338.028	0.0327516	0.0695306	0.28674	0.75584
ENSG00000162643	16.1431	0.00484179	0.0687918	0.519797	NA
ENSG00000055732	579.234	-0.00494351	0.0601791	0.866503	0.974302
ENSG00000280099	485.774	0.0272002	0.0637556	0.405397	0.819087
ENSG00000097096	2681.72	0.114758	0.0841009	0.0249431	0.282117
ENSG00000162642	1046.84	0.119755	0.0928203	0.0242761	0.27747
ENSG00000142867	1098.91	0.230239	0.110633	0.00216545	0.0655104
ENSG00000223653	27.34	-0.000644407	0.0681086	0.949486	NA
ENSG00000153904	5005.79	0.00815979	0.0505876	0.81425	0.964268
ENSG00000282057	21.9132	0.0117806	0.069919	0.169093	NA
ENSG00000142871	7763.6	0.0323307	0.0582463	0.371034	0.802822
ENSG00000117174	3402.13	0.036915	0.0562808	0.31521	0.770206
ENSG00000171502	80.6371	-0.0144119	0.0689816	0.384388	0.809565
ENSG00000122417	2041.85	-0.00251118	0.055485	0.911033	0.984057
ENSG00000137975	778.795	-0.0319155	0.0777949	0.0626583	0.439077
ENSG00000261737	32.4653	-0.0120035	0.0696575	0.258331	NA
ENSG00000097033	4848.67	0.0244451	0.0518329	0.545011	0.882823
ENSG00000183291	4191.95	0.0130231	0.0509995	0.678161	0.927475
ENSG00000153936	2782.24	-0.0149068	0.049056	0.665726	0.925147
ENSG00000267734	12.413	-0.000953346	0.068624	0.885822	NA
ENSG00000267272	12.3563	-0.00638701	0.0690907	0.321887	NA
ENSG00000143013	7307.21	-0.0381418	0.0565835	0.306477	0.76648
ENSG00000227290	35.4319	-0.000171046	0.0680659	0.985599	NA
ENSG00000279778	7.81625	-0.00141033	0.0687714	0.786398	NA
ENSG00000237505	44.254	-0.0101814	0.0687178	0.440677	NA
ENSG00000065243	5762.83	0.0507591	0.0585204	0.200305	0.681258
ENSG00000207234	13.1255	-0.00571461	0.0689502	0.410928	NA
ENSG00000241975	42.4853	-0.0173216	0.0712557	0.123629	NA
ENSG00000137947	784.777	0.00245786	0.0585858	0.937568	0.990413
ENSG00000137944	1259.28	-0.0733672	0.0766833	0.0911114	0.513509
ENSG00000213516	1787.52	-0.0205173	0.0554276	0.552008	0.886252
ENSG00000117226	1074.22	-0.0260821	0.0612897	0.425794	0.830397
ENSG00000117228	640.698	0.0836501	0.103826	0.0529728	0.407954
ENSG00000234518	56.6869	-0.0140871	0.0695317	0.317698	0.771253
ENSG00000162645	1273.02	-0.204554	0.136401	0.00668596	0.133853
ENSG00000213512	26.9072	-0.0166163	0.0711951	0.0998	NA
ENSG00000162654	47.0123	0.0224928	0.0730779	0.0944554	NA
ENSG00000225492	16.6085	-0.000145354	0.0684082	0.984455	NA
ENSG00000197147	5921.43	-0.0114872	0.0467987	0.641487	0.914669
ENSG00000231999	53.0084	-0.00982611	0.0688062	0.428697	0.831863
ENSG00000171488	1048.41	-0.00119342	0.0565397	0.969826	0.995518
ENSG00000272931	23.5186	-0.00650567	0.0686795	0.508712	NA
ENSG00000171492	6223.06	0.0577204	0.0637368	0.154031	0.624461
ENSG00000272672	20.3343	0.0021942	0.0684732	0.79701	NA
ENSG00000228175	89.6525	-0.0115508	0.0679038	0.50643	0.866323
ENSG00000162664	1606.62	0.0837482	0.0767497	0.06354	0.441947
ENSG00000122482	5602.62	0.0482426	0.0553103	0.214533	0.695074
ENSG00000097046	1300.76	-0.0298607	0.0581323	0.390358	0.814062
ENSG00000069702	344.24	0.0117404	0.0657357	0.611957	0.908051
ENSG00000172031	37.6458	-0.0116906	0.0693253	0.329229	NA
ENSG00000189195	81.8121	0.0220515	0.0712604	0.23797	0.718289
ENSG00000174842	705.608	0.000384916	0.0577109	0.992734	0.998182
ENSG00000122484	2023.83	0.154189	0.0870513	0.00750718	0.143667
ENSG00000162676	122.523	0.0131898	0.0672304	0.521906	0.872515
ENSG00000067208	1636.64	-0.0441901	0.0591045	0.255869	0.729134
ENSG00000229992	14.6167	0.00388438	0.0688119	0.54907	NA
ENSG00000225505	18.3986	0.00573276	0.0689593	0.407403	NA
ENSG00000223896	14.2499	-0.0114479	0.0699705	0.124603	NA
ENSG00000122406	17676.8	-0.000471258	0.0458915	0.981358	0.997621
ENSG00000154511	532.393	0.0535635	0.0781613	0.141967	0.606552
ENSG00000207523	51.4586	-0.000328675	0.0676882	0.977948	0.99722
ENSG00000143033	1243.61	0.0339832	0.0584197	0.346974	0.788218
ENSG00000117500	4388.62	-0.00584503	0.0470326	0.864919	0.974123
ENSG00000122483	869.506	-0.0600342	0.0789765	0.123654	0.581753
ENSG00000225297	12.6386	0.000714832	0.0685952	0.920842	NA
ENSG00000223745	445.281	0.00197704	0.06152	0.944585	0.990927
ENSG00000117505	6269.35	0.0594422	0.053036	0.13497	0.598504
ENSG00000229635	9.49213	-0.00886602	0.0695104	0.164564	NA
ENSG00000137942	6346.5	-0.00666451	0.0469404	0.829117	0.967078
ENSG00000137936	2511.12	0.085706	0.0721891	0.0573597	0.422577
ENSG00000224093	217.049	-0.0341029	0.0731295	0.2176	0.698962
ENSG00000230439	64.1674	-0.00583594	0.0677385	0.679114	0.927475
ENSG00000260464	18.5975	0.0186054	0.0721457	0.0402575	NA
ENSG00000067334	3421.86	0.0808352	0.0625364	0.058959	0.425499
ENSG00000023909	3253.14	0.0207342	0.0528618	0.555466	0.887075
ENSG00000198691	670.339	-0.0162544	0.0625057	0.53472	0.878104
ENSG00000137962	11681.8	0.0951107	0.0639375	0.0325946	0.327524
ENSG00000236098	18.0996	0.0135683	0.070409	0.115883	NA
ENSG00000117528	6733.14	-0.069819	0.0580972	0.0866362	0.504892
ENSG00000117525	1745.37	0.0889913	0.0762262	0.053763	0.410086
ENSG00000224081	791.374	0.00948638	0.0577754	0.768503	0.952699
ENSG00000263526	9.13594	-0.00835877	0.0694454	0.16749	NA
ENSG00000143036	1780.38	0.0532862	0.0654149	0.178066	0.655007
ENSG00000117519	13921.6	-0.0305698	0.0516989	0.394414	0.815974
ENSG00000235501	196.329	-0.00387281	0.0638626	0.875871	0.977385
ENSG00000172339	797.614	0.0438131	0.0694385	0.227941	0.709825
ENSG00000230427	6.32826	-0.00186248	0.0688127	0.703408	NA
ENSG00000152078	1556.39	0.0172977	0.0539578	0.610546	0.907388
ENSG00000271092	39.5992	-0.028668	0.0770426	0.0172939	NA
ENSG00000231992	9.90712	0.00333385	0.0687914	0.591539	NA
ENSG00000226026	29.661	0.00941428	0.0692661	0.312489	NA
ENSG00000122481	231.374	-0.0046039	0.0638361	0.849837	0.971628
ENSG00000228852	21.7296	0.00962005	0.0693619	0.282166	NA
ENSG00000271252	75.387	-0.0151592	0.0694411	0.335356	0.780575
ENSG00000228502	11.8034	0.000197654	0.0685956	0.979386	NA
ENSG00000117569	962.351	0.524838	0.100583	9.07961e-09	1.94239e-06
ENSG00000188641	1414.06	-0.000253197	0.0569372	0.991695	0.998182
ENSG00000232878	12.2114	0.00626227	0.0691657	0.250993	NA
ENSG00000228057	11.7462	0.00803205	0.0692687	0.267301	NA
ENSG00000270911	10.5445	0.0109577	0.0699656	0.0865106	NA
ENSG00000162627	1121.57	-0.0274899	0.0607952	0.400848	0.818038
ENSG00000099260	1405.42	-0.040052	0.0616418	0.27338	0.744911
ENSG00000156869	931.22	0.00178142	0.0591069	0.954941	0.992659
ENSG00000162688	1024.16	-7.77262e-05	0.0573461	0.995114	0.998897
ENSG00000228084	20.2202	0.00359709	0.0684626	0.698113	NA
ENSG00000117620	2778.47	-0.0190329	0.0534024	0.58515	0.897207
ENSG00000202259	20.3843	0.00136036	0.0683109	0.887075	NA
ENSG00000156875	3789.42	-0.067847	0.0591935	0.0947974	0.521333
ENSG00000156876	955.282	-0.0219929	0.0585385	0.509738	0.867278
ENSG00000226952	15.5869	0.0103534	0.0696189	0.207399	NA
ENSG00000122435	616.363	0.243231	0.15431	0.00475575	0.109734
ENSG00000122477	67.1803	-0.00715884	0.0678499	0.616297	0.908358
ENSG00000137992	2116.37	0.0454755	0.0618139	0.184335	0.662085
ENSG00000230287	16.5466	-0.0100078	0.0695988	0.195396	NA
ENSG00000224616	37.7986	0.0042218	0.067966	0.736053	NA
ENSG00000137996	1946.18	0.0336478	0.054346	0.356338	0.793954
ENSG00000079335	486.14	0.590616	0.124789	1.05446e-07	1.71636e-05
ENSG00000234332	19.9566	0.00588369	0.0687953	0.489309	NA
ENSG00000162694	784.674	-0.0229898	0.0642649	0.446612	0.839149
ENSG00000162695	5991.33	0.026909	0.0528835	0.468771	0.849182
ENSG00000230946	59.6367	0.000122438	0.0673596	0.99482	0.998897
ENSG00000117543	713.636	0.0136714	0.0584183	0.673595	0.926479
ENSG00000235795	10.4608	-0.000574973	0.0686143	0.930878	NA
ENSG00000233184	293.593	0.0201376	0.0663947	0.44695	0.839216
ENSG00000170989	12.4855	0.00309222	0.0686387	0.682676	NA
ENSG00000185946	875.11	-0.00939135	0.0583416	0.766434	0.952003
ENSG00000240038	24.4072	-0.00779082	0.0688682	0.431659	NA
ENSG00000198890	1221.84	0.0248968	0.057856	0.461679	0.845918
ENSG00000162631	132.002	-0.00324325	0.0653607	0.876764	0.977385
ENSG00000134215	2663.28	-0.0202414	0.0540548	0.56549	0.889331
ENSG00000085491	2438.36	-0.00947841	0.050243	0.63462	0.913672
ENSG00000196427	73.1044	-0.00271372	0.0670465	0.863566	0.97392
ENSG00000238122	10.7513	0.0119456	0.0702014	0.0673489	NA
ENSG00000241361	91.4686	0.0330083	0.0783233	0.0666542	0.451446
ENSG00000243967	24.1155	-0.0138316	0.070393	0.134404	NA
ENSG00000186086	72.4216	0.00924231	0.0680996	0.511949	0.868057
ENSG00000162636	1165.8	-0.0411831	0.0676451	0.281836	0.752035
ENSG00000162639	1240.96	-0.0478665	0.0636929	0.212914	0.694213
ENSG00000134186	3129.73	0.129468	0.0672475	0.00815682	0.149912
ENSG00000116266	1699.13	0.00942553	0.0529133	0.784147	0.956653
ENSG00000228076	20.675	0.00632351	0.0689475	0.414189	NA
ENSG00000121957	3857.06	-0.0192162	0.0529483	0.582078	0.896403
ENSG00000121940	2548.3	-0.0380368	0.0575596	0.307738	0.767051
ENSG00000085433	764.495	0.0207499	0.0582901	0.521028	0.872131
ENSG00000244716	12.6799	0.00437916	0.0687654	0.550604	NA
ENSG00000197780	962.097	-0.0121672	0.055146	0.717994	0.938552
ENSG00000273382	44.1214	0.00287378	0.0676213	0.834316	NA
ENSG00000215717	1616.99	-0.00955192	0.0524451	0.781364	0.956191
ENSG00000270066	23.1627	0.00224927	0.0683132	0.817534	NA
ENSG00000251484	46.7028	0.0191993	0.0714408	0.167004	NA
ENSG00000179902	19.1833	-0.00329267	0.0685569	0.690561	NA
ENSG00000116299	10602.4	-0.341974	0.0836539	2.3561e-06	0.000277816
ENSG00000031698	11365.2	0.0534342	0.0567847	0.187582	0.666528
ENSG00000143126	19813.1	-0.0799358	0.0527385	0.0447641	0.381814
ENSG00000134222	1307.41	-0.0266	0.0615084	0.425848	0.830397
ENSG00000221986	76.2126	-0.0306678	0.076592	0.0862116	0.503992
ENSG00000134243	29182.6	-0.0436806	0.0482222	0.238026	0.718289
ENSG00000143106	3724.13	-0.0136191	0.0504896	0.694306	0.932795
ENSG00000143028	72.3104	-0.0112459	0.0685644	0.449898	0.840726
ENSG00000162650	826.656	-0.0204089	0.0577588	0.548732	0.884464
ENSG00000174151	979.674	0.00675732	0.0565465	0.835829	0.968024
ENSG00000181754	1164.4	0.0446066	0.0681621	0.215048	0.695688
ENSG00000156097	22.3802	-0.00208223	0.0683026	0.827934	NA
ENSG00000065135	6890.95	0.0368225	0.049551	0.351259	0.791469
ENSG00000116337	3156.75	-0.0150474	0.0509549	0.668209	0.925657
ENSG00000168765	435.155	0.0121874	0.0616514	0.677452	0.927304
ENSG00000213366	24.7916	0.000780602	0.0683089	0.93551	NA
ENSG00000134202	1394.1	0.00996678	0.0609322	0.733557	0.943878
ENSG00000228420	11.9771	0.00752361	0.069221	0.275952	NA
ENSG00000184371	4104.2	0.117302	0.0877364	0.0243529	0.27747
ENSG00000168710	13043.6	0.0905383	0.0644821	0.0420474	0.369519
ENSG00000143093	3579.22	-0.0185407	0.047656	0.594906	0.901477
ENSG00000258634	759.06	-0.0364209	0.063875	0.303673	0.763794
ENSG00000156150	9.53068	-0.000548076	0.0686723	0.927767	NA
ENSG00000258673	8.87265	-0.00082482	0.0686869	0.890591	NA
ENSG00000186150	10.389	-0.00170756	0.0686659	0.793002	NA
ENSG00000197106	3925.78	-0.0723896	0.0580386	0.0763023	0.480631
ENSG00000227091	11.3317	-0.00367421	0.0687893	0.569717	NA
ENSG00000235526	33.7235	-0.00735471	0.0684364	0.537647	NA
ENSG00000224965	25.3622	0.00137244	0.068312	0.885994	NA
ENSG00000116396	5310.68	-0.0191655	0.0507528	0.586597	0.898098
ENSG00000227963	62.9523	-0.00907758	0.0680905	0.538057	0.879725
ENSG00000162775	3851.76	-0.022966	0.0511984	0.513816	0.868309
ENSG00000224699	304.466	-0.00210341	0.0641945	0.92749	0.98792
ENSG00000168679	278.06	0.0311445	0.072948	0.213141	0.694472
ENSG00000273373	180.602	0.00310627	0.0662267	0.869615	0.974818
ENSG00000134248	1758.99	-0.0030984	0.0532222	0.925841	0.987454
ENSG00000143119	8.40303	0.00788806	0.0694573	0.109612	NA
ENSG00000261654	78.5919	0.0297436	0.0759389	0.0989144	0.530267
ENSG00000232811	68.9852	0.0206688	0.0714132	0.205984	0.687176
ENSG00000121931	1020.48	0.0790842	0.0838678	0.0788221	0.486636
ENSG00000273010	41.2814	0.00192205	0.0678585	0.876808	NA
ENSG00000225672	25.0002	0.00340047	0.0685711	0.68271	NA
ENSG00000156171	2800.3	0.0427438	0.0569007	0.258905	0.730328
ENSG00000134255	3728.07	0.0629501	0.0645109	0.144838	0.612675
ENSG00000162777	2258.29	-0.0152401	0.0514844	0.662952	0.924108
ENSG00000064886	891.454	0.0456596	0.0723591	0.199347	0.680518
ENSG00000173947	23.8097	0.0166147	0.0711331	0.113134	NA
ENSG00000085465	424.731	0.728473	0.122939	1.51395e-10	4.72321e-08
ENSG00000260948	30.2954	-0.00225725	0.0682463	0.821363	NA
ENSG00000233337	41.893	0.00151946	0.0676541	0.909816	NA
ENSG00000243960	46.2898	0.0138604	0.0697785	0.277563	NA
ENSG00000116455	3130.53	-0.00969432	0.0517368	0.779708	0.956191
ENSG00000199890	42.3044	0.000496849	0.0679887	0.96689	NA
ENSG00000116459	3537.02	-0.0350233	0.0543813	0.333812	0.780386
ENSG00000143110	13.9303	0.0116099	0.0700081	0.122195	NA
ENSG00000116473	2716.43	0.0284368	0.0549746	0.42674	0.830681
ENSG00000231346	11.0002	0.00418977	0.0688896	0.478306	NA
ENSG00000215867	31.727	0.00643331	0.0687117	0.503891	NA
ENSG00000201028	9.97289	-0.00442108	0.0688835	0.474193	NA
ENSG00000197852	755.511	-0.0163991	0.0583947	0.608068	0.906404
ENSG00000064703	1281.79	0.156093	0.0923339	0.00835764	0.152629
ENSG00000143079	2162.02	0.0553644	0.0622995	0.16402	0.636758
ENSG00000134245	269.551	-0.000850045	0.0635926	0.970116	0.995518
ENSG00000273483	21.9215	0.00404079	0.0685676	0.644196	NA
ENSG00000007341	983.951	0.141434	0.106701	0.0163008	0.224774
ENSG00000116489	9666.63	0.0051107	0.0506541	0.882705	0.978389
ENSG00000235299	24.1236	0.0072269	0.0688121	0.458029	NA
ENSG00000155363	7032.03	-0.0200724	0.0458077	0.570825	0.892207
ENSG00000225075	30.0016	-0.0041687	0.0683127	0.689524	NA
ENSG00000155366	4464.36	-0.0585983	0.0631073	0.144957	0.612675
ENSG00000155367	32.4991	0.00699994	0.0684886	0.542371	NA
ENSG00000155380	2032.69	0.0411802	0.0564171	0.270676	0.741763
ENSG00000226419	146.078	-0.0149405	0.0681057	0.4459	0.838826
ENSG00000238198	49.7334	-0.00466845	0.0678329	0.724443	0.940651
ENSG00000198799	3396.41	0.00399565	0.051654	0.907722	0.982856
ENSG00000081026	7659.52	-0.0719217	0.0742947	0.0880006	0.509593
ENSG00000232499	24.0592	-0.008497	0.0693036	0.266378	NA
ENSG00000116793	1094.95	-0.0517205	0.0662709	0.185029	0.662605
ENSG00000232450	34.2589	0.00415185	0.0680317	0.732653	NA
ENSG00000081019	1064.21	0.0849595	0.084774	0.0632682	0.441254
ENSG00000231128	8.21632	-0.00236494	0.0688422	0.622636	NA
ENSG00000134242	45.8743	0.00417583	0.0680097	0.733869	NA
ENSG00000226167	45.5273	0.0259452	0.0748718	0.0605398	NA
ENSG00000188761	23.8725	-0.00476999	0.0687437	0.540994	NA
ENSG00000134262	652.392	-0.0320922	0.0628472	0.350468	0.790401
ENSG00000118655	1240.04	-0.0379162	0.0609747	0.298482	0.760203
ENSG00000235527	15.4658	-0.0104521	0.0697029	0.173906	NA
ENSG00000163349	8951.12	0.0199828	0.0474621	0.568562	0.890964
ENSG00000116774	827.658	0.0501634	0.0729813	0.173796	0.649673
ENSG00000134207	15.4728	0.006624	0.0689679	0.402397	NA
ENSG00000197323	5560.19	0.0478251	0.049747	0.196161	0.677002
ENSG00000226984	12.3287	-0.000619666	0.0685889	0.928161	NA
ENSG00000225650	9.58626	-0.00315528	0.068756	0.622092	NA
ENSG00000116752	1706.96	0.00456785	0.0515268	0.89463	0.980787
ENSG00000175984	211.009	0.200043	0.289866	0.010932	0.1797
ENSG00000213281	5546.03	0.0326189	0.0549602	0.379676	0.807402
ENSG00000009307	30496.7	-0.01343	0.0455474	0.795743	0.959488
ENSG00000201900	24.1697	-0.000535271	0.0684043	0.948569	NA
ENSG00000052723	3189.37	-0.00664807	0.0521556	0.842858	0.969101
ENSG00000134198	175.356	0.0637608	0.11081	0.0223643	0.266857
ENSG00000173218	5165.64	-0.000666132	0.0482784	0.984703	0.998182
ENSG00000163393	336.352	0.509061	0.141584	1.44336e-05	0.00142199
ENSG00000173212	86.2259	0.00510055	0.0669628	0.764405	0.951658
ENSG00000163399	95247.2	-0.125002	0.0656	0.00755432	0.144139
ENSG00000203865	258.55	-0.0232905	0.0684178	0.361378	0.797993
ENSG00000224950	51.6538	-0.0119131	0.0689471	0.394333	0.815974
ENSG00000116815	455.007	-0.00528024	0.0627294	0.843107	0.969101
ENSG00000177173	36.4869	0.00574657	0.0681742	0.636198	NA
ENSG00000143061	5677.99	-0.0719042	0.0585597	0.0812301	0.492677
ENSG00000134247	7589.93	-0.0435573	0.0499495	0.235008	0.716314
ENSG00000134256	126.595	0.0185115	0.0696566	0.326575	0.775403
ENSG00000236137	57.9203	-0.00679949	0.0679374	0.625798	0.911326
ENSG00000116830	2689.75	0.00378764	0.05514	0.91143	0.984057
ENSG00000134253	696.91	0.0259102	0.0627339	0.429048	0.832118
ENSG00000228453	7.89864	0.0049188	0.0690316	0.329686	NA
ENSG00000134258	13547.1	-0.0459867	0.0541726	0.241193	0.72006
ENSG00000271427	22.3599	-0.0116067	0.0697342	0.222315	NA
ENSG00000198162	4741.28	-0.00958213	0.051993	0.778121	0.955892
ENSG00000183508	1061.06	0.00633532	0.0582661	0.841601	0.969101
ENSG00000196505	3730.25	0.107539	0.0664917	0.0206309	0.254069
ENSG00000065183	2362.79	0.0112004	0.052513	0.746179	0.947592
ENSG00000155761	21.215	-0.00504197	0.0686833	0.555358	NA
ENSG00000092607	16.7627	0.00880452	0.0692753	0.293195	NA
ENSG00000116874	789.853	0.00330821	0.0579628	0.91803	0.98612
ENSG00000224238	17.3248	-0.00525375	0.0687998	0.499936	NA
ENSG00000231365	499.629	0.0433915	0.0722932	0.208363	0.690469
ENSG00000227056	11.5366	0.00236773	0.0687188	0.710453	NA
ENSG00000260941	47.7655	-0.00630497	0.0680043	0.636471	0.913672
ENSG00000198857	109.537	-0.0184445	0.0692473	0.350351	0.79034
ENSG00000143067	495.981	0.00910916	0.0625468	0.720927	0.939333
ENSG00000092621	16850.5	-0.017994	0.0552786	0.596275	0.901801
ENSG00000261662	33.4391	0.00362227	0.0684337	0.702207	NA
ENSG00000134250	21928.6	0.0087328	0.0456561	0.811277	0.963944
ENSG00000265808	3747.64	0.00763129	0.0488585	0.829659	0.967085
ENSG00000223804	33.0092	0.0246045	0.074786	0.0234749	NA
ENSG00000270392	94.5882	-0.036793	0.0817202	0.0339571	0.333555
ENSG00000270231	2103.45	0.0338497	0.058726	0.349638	0.790143
ENSG00000275131	571.43	0.0445017	0.0719055	0.195681	0.676554
ENSG00000273136	780.861	0.370205	0.11673	7.36626e-05	0.00527798
ENSG00000275538	46.4237	-0.0130175	0.0695518	0.301915	NA
ENSG00000226067	18.8071	0.0180645	0.0719235	0.0463931	NA
ENSG00000188610	270.114	-0.0170722	0.0656099	0.509587	0.867278
ENSG00000171943	1264.87	-0.0116035	0.0563994	0.777479	0.955516
ENSG00000230806	13.4073	0.0104236	0.0698031	0.123512	NA
ENSG00000227082	17.7681	0.00935767	0.0694302	0.243753	NA
ENSG00000272583	28.2483	0.00176237	0.068087	0.873882	NA
ENSG00000231752	193.075	0.0138142	0.0670106	0.521936	0.872515
ENSG00000263513	119.657	-0.0190339	0.0701685	0.295007	0.759392
ENSG00000270872	68.2566	-0.0162946	0.0696007	0.331218	0.778777
ENSG00000207205	56.5674	-0.0184601	0.0708423	0.218422	0.699679
ENSG00000266338	3708.39	-0.00580988	0.0480678	0.865278	0.974178
ENSG00000227212	97.5442	0.00515775	0.0671576	0.752338	0.948658
ENSG00000196369	621.505	0.0883446	0.108426	0.0484283	0.39107
ENSG00000215784	126.198	-0.0143065	0.0677374	0.475616	0.8541
ENSG00000272419	67.3652	0.541457	0.436251	0.00386401	0.0967617
ENSG00000223612	70.8284	-0.00315387	0.067049	0.843674	0.969303
ENSG00000276216	240.345	-0.0258986	0.0702528	0.296271	0.759392
ENSG00000162825	505.962	0.0625108	0.0914242	0.0847896	0.499471
ENSG00000234367	60.7905	-0.0132414	0.0690318	0.377146	0.806247
ENSG00000270722	398.203	0.00238444	0.0676098	0.86277	0.973729
ENSG00000272150	240.687	0.000919839	0.0633097	0.996428	0.999016
ENSG00000117262	594.175	0.0757316	0.0918884	0.073001	0.47142
ENSG00000174827	601.628	-0.0501506	0.0772471	0.15905	0.629402
ENSG00000117281	416.35	0.0236195	0.0655451	0.42162	0.828438
ENSG00000265491	4564.74	0.150429	0.066421	0.00290328	0.0799202
ENSG00000186141	3883.83	0.0635261	0.0652709	0.124343	0.583119
ENSG00000186364	97.4895	0.39888	0.567464	0.00590859	0.12515
ENSG00000131788	2515.07	-0.00397827	0.0486049	0.907666	0.982856
ENSG00000198483	15.03	0.00947475	0.0694914	0.21938	NA
ENSG00000143127	41.9043	0.00841009	0.0688672	0.430599	NA
ENSG00000131779	719.529	-0.0237229	0.0605865	0.473203	0.852599
ENSG00000265241	4078.99	-0.0592265	0.0637909	0.151078	0.620082
ENSG00000211451	50.0512	0.00666346	0.0682231	0.598002	0.902366
ENSG00000234222	22.8871	0.00190496	0.0684039	0.832288	NA
ENSG00000271601	621.048	0.0168479	0.061438	0.584399	0.896933
ENSG00000272031	122.073	0.00312914	0.0656816	0.87849	0.977536
ENSG00000121851	181.491	-0.0214389	0.0688081	0.360191	0.796965
ENSG00000201558	174.98	-0.0244757	0.0701453	0.300832	0.76226
ENSG00000233396	144.576	-0.00820686	0.0675498	0.614766	0.908358
ENSG00000271425	515.53	0.139002	0.158227	0.0204487	0.252865
ENSG00000213240	21.8728	-0.00181237	0.0684717	0.82628	NA
ENSG00000264343	296.226	0.0611936	0.0934972	0.0802581	0.489311
ENSG00000273768	40.3412	-0.0068587	0.0682455	0.585805	NA
ENSG00000274428	11.852	0.00530945	0.0688781	0.461211	NA
ENSG00000276975	23.0362	0.00259068	0.0684681	0.767153	NA
ENSG00000268043	1739.88	0.122418	0.0991155	0.0242654	0.27747
ENSG00000244371	34.4423	-0.000401276	0.068001	0.969776	NA
ENSG00000131791	1645.78	0.102858	0.084194	0.0366405	0.344007
ENSG00000237188	169.375	-0.00137235	0.065155	0.947552	0.991524
ENSG00000131781	204.175	-0.00445736	0.0641066	0.853417	0.971847
ENSG00000180867	204.758	0.0581816	0.0990902	0.0449515	0.381908
ENSG00000226015	41.2392	-0.0157592	0.0703731	0.217878	NA
ENSG00000131778	2699.63	0.165973	0.0767403	0.003062	0.0825893
ENSG00000278811	109.211	0.000736951	0.0663949	0.970755	0.995518
ENSG00000116128	2018.95	-0.00126803	0.0503965	0.970035	0.995518
ENSG00000162836	1616.92	0.0244288	0.0548081	0.482796	0.856233
ENSG00000265107	992.788	0.0368235	0.0620908	0.308647	0.767336
ENSG00000188092	355.459	0.0261574	0.069194	0.324839	0.773935
ENSG00000215859	53.8359	0.00402117	0.0676891	0.770488	0.95385
ENSG00000206585	145.851	0.0122152	0.0674116	0.526724	0.873674
ENSG00000263956	1045.95	0.189615	0.120333	0.00689029	0.135556
ENSG00000225080	14.9437	0.00118853	0.0685496	0.876812	NA
ENSG00000198658	19.2435	-0.00564465	0.0688751	0.453454	NA
ENSG00000227733	8.56375	0.00171924	0.0687538	0.761184	NA
ENSG00000199879	16.4699	0.0077705	0.0691058	0.345899	NA
ENSG00000228626	70.8551	0.00213431	0.0671782	0.891304	0.979905
ENSG00000231196	28.8655	-0.00415025	0.0685992	0.624769	NA
ENSG00000238107	10.1461	0.00430052	0.0688728	0.488057	NA
ENSG00000274020	187.59	0.0495655	0.0876778	0.0800473	0.48887
ENSG00000238825	11.465	-0.00849663	0.0694407	0.18247	NA
ENSG00000231551	111.583	0.0212086	0.0716982	0.190639	0.669698
ENSG00000225871	36.8234	0.0098537	0.0688157	0.428693	NA
ENSG00000280649	44.1334	0.0110191	0.0688684	0.405312	NA
ENSG00000274210	111.772	-0.0167118	0.0695822	0.327467	0.77629
ENSG00000270629	1179.37	0.19223	0.107687	0.00492144	0.111834
ENSG00000178104	3187.44	-0.0138311	0.0483831	0.69184	0.93162
ENSG00000269713	3380.58	0.0213963	0.0501655	0.627148	0.911727
ENSG00000274265	49.0916	0.00988919	0.0685928	0.466677	0.848497
ENSG00000215861	19.341	0.00636387	0.068933	0.420414	NA
ENSG00000271383	862.197	0.162168	0.151424	0.0147465	0.211769
ENSG00000277147	102.811	0.00909635	0.066676	0.645444	0.916163
ENSG00000275557	72.3611	0.0261566	0.0740549	0.123467	0.581266
ENSG00000206828	58.0202	-0.0324485	0.0786067	0.0431095	0.373159
ENSG00000203814	3531.04	-0.00705751	0.0652859	0.748204	0.947831
ENSG00000183598	857.436	0.0520175	0.0755921	0.153695	0.62421
ENSG00000270882	20.5978	0.016482	0.0713203	0.0673253	NA
ENSG00000220323	30.0826	0.00983832	0.0690137	0.388239	NA
ENSG00000261716	601.097	0.0275366	0.0644987	0.351894	0.791745
ENSG00000203819	57.0888	0.0116714	0.0690238	0.385889	0.810361
ENSG00000184678	6173.49	0.000382584	0.0643486	0.97549	0.99722
ENSG00000184260	3012.18	0.0122705	0.0585686	0.748083	0.947831
ENSG00000184270	1045.79	-0.0195343	0.0618392	0.530552	0.875484
ENSG00000178096	217.486	0.00522661	0.064333	0.831464	0.967442
ENSG00000159164	11.4427	0.000450782	0.0686543	0.945974	NA
ENSG00000143368	5751.12	0.0155839	0.0537258	0.646237	0.916246
ENSG00000014914	472.565	-0.0193105	0.0613845	0.540529	0.881319
ENSG00000264522	2409.23	0.057845	0.0621868	0.144064	0.611378
ENSG00000223945	25.4964	-0.00782741	0.0688664	0.431652	NA
ENSG00000136631	1455.77	0.069253	0.0695966	0.105503	0.543091
ENSG00000023902	223.919	0.00557563	0.0644985	0.828137	0.966816
ENSG00000143401	2770.55	-0.00905289	0.0514217	0.732856	0.94376
ENSG00000118298	58.0887	-0.00186644	0.0673835	0.895818	0.981345
ENSG00000117362	5805.95	-0.0135108	0.0486235	0.696381	0.933182
ENSG00000118292	88.5044	-0.00278562	0.0666608	0.870843	0.975074
ENSG00000159208	385.324	0.404088	0.152934	0.000337961	0.0170403
ENSG00000266472	1552.96	-0.0365135	0.060865	0.331648	0.779047
ENSG00000278939	29.8869	0.000448167	0.0681209	0.967826	NA
ENSG00000117360	3832.99	0.0750382	0.058171	0.0684953	0.45689
ENSG00000163125	5312.81	0.0482186	0.0511977	0.198439	0.679919
ENSG00000143374	1493.54	0.00315861	0.0510962	0.927045	0.987867
ENSG00000143369	98.3679	0.0182967	0.069573	0.347198	0.7883
ENSG00000228126	20.2434	0.00492636	0.0685513	0.603515	NA
ENSG00000237781	18.02	0.0049885	0.0687864	0.516998	NA
ENSG00000143382	151.553	-0.00692	0.0658301	0.737974	0.945225
ENSG00000203804	103.187	0.0109279	0.0675105	0.550828	0.88546
ENSG00000274963	9.29478	-0.00417351	0.0688488	0.506637	NA
ENSG00000143384	9980.36	0.114706	0.0590496	0.0154197	0.217519
ENSG00000253047	17.6192	0.00219239	0.0684355	0.803825	NA
ENSG00000143420	5032.62	-0.0373213	0.0546214	0.29927	0.761266
ENSG00000276103	10.428	0.00522958	0.0689315	0.427872	NA
ENSG00000143457	2044.79	0.0208393	0.0542404	0.558387	0.888319
ENSG00000143452	82.9428	-0.0167733	0.0697214	0.314585	0.770046
ENSG00000163131	264.18	0.0440732	0.0825211	0.104324	0.540305
ENSG00000143387	160.602	-0.0191693	0.0684578	0.390883	0.814257
ENSG00000143437	2595.85	0.0693739	0.0627816	0.091536	0.514435
ENSG00000143379	2547.74	-0.039328	0.0523948	0.285863	0.7551
ENSG00000143418	7033.23	0.0130676	0.0444081	0.701752	0.934706
ENSG00000231073	25.1589	0.00501358	0.0685367	0.602806	NA
ENSG00000143412	689.746	-0.0439035	0.0703478	0.201905	0.683106
ENSG00000143409	1224.67	-0.0421093	0.0626847	0.256488	0.729379
ENSG00000143363	1668.29	0.0206578	0.0523746	0.587768	0.898846
ENSG00000163141	73.8744	-0.0147568	0.0691509	0.365225	0.799279
ENSG00000143443	165.349	-0.00394833	0.0651895	0.853239	0.971847
ENSG00000197622	4978.44	-0.00033428	0.0454746	0.990559	0.998182
ENSG00000213190	434.342	-0.0373026	0.0735658	0.214495	0.695074
ENSG00000143458	1422.38	0.0617032	0.0700418	0.131452	0.594009
ENSG00000143434	90.4089	-0.00567499	0.067299	0.717375	0.938408
ENSG00000163154	19.7546	0.00315449	0.0685324	0.710935	NA
ENSG00000163156	973.622	0.175551	0.09972	0.005975	0.126072
ENSG00000163155	353.835	0.0101473	0.061521	0.72685	0.941436
ENSG00000163159	2763.15	0.0414277	0.063872	0.246932	0.7235
ENSG00000143398	3942.06	0.225133	0.0691054	8.84315e-05	0.00606737
ENSG00000159352	3958.8	0.0266024	0.0565849	0.447142	0.839407
ENSG00000232671	27.2599	-0.000406971	0.0681295	0.967313	NA
ENSG00000143373	3191.59	0.045926	0.0557474	0.232	0.713964
ENSG00000143393	3531.66	0.0527043	0.0606723	0.182193	0.658662
ENSG00000143390	1692.4	-0.0202928	0.0559	0.555653	0.887279
ENSG00000143416	2514.24	-0.214842	0.0862179	0.000909583	0.0350867
ENSG00000159377	3596.92	-0.0596686	0.0637948	0.139333	0.602502
ENSG00000143442	5295.46	0.0657651	0.0569067	0.103021	0.537416
ENSG00000238711	14.1543	-0.00197809	0.0686293	0.776737	NA
ENSG00000143375	1462.37	0.346612	0.0892357	5.75771e-06	0.000615869
ENSG00000143367	1448.02	0.380458	0.0947554	3.16696e-06	0.000358227
ENSG00000232536	28.1472	0.00509881	0.0684532	0.619547	NA
ENSG00000207606	16.8906	0.00761091	0.0691023	0.344944	NA
ENSG00000223861	24.1354	-0.00268147	0.0683225	0.781179	NA
ENSG00000250734	27.6667	-0.0131243	0.0702263	0.143321	NA
ENSG00000143376	3840.06	0.051964	0.0629002	0.186557	0.664848
ENSG00000143436	2684.48	0.0526616	0.0638505	0.195193	0.675875
ENSG00000143450	200.056	-0.0297078	0.0725746	0.227528	0.709754
ENSG00000249602	54.7219	0.00911998	0.0686778	0.463161	0.846253
ENSG00000268288	8.2545	-0.0022528	0.0687748	0.687764	NA
ENSG00000182134	1289.43	0.0581756	0.0660902	0.147871	0.61493
ENSG00000203288	54.1225	-1.223e-05	0.0674386	0.998779	0.999581
ENSG00000213171	21.2891	0.00383228	0.0685143	0.671396	NA
ENSG00000143365	359.872	0.0242777	0.0647081	0.427282	0.831069
ENSG00000225556	121.392	-0.00977181	0.0671887	0.59593	0.901602
ENSG00000234614	70.3924	0.0167358	0.0699433	0.29331	0.758867
ENSG00000196407	33.8535	-0.0125655	0.0697133	0.260371	NA
ENSG00000159445	551.952	-0.00369431	0.059006	0.904617	0.98266
ENSG00000197747	4745.71	0.0107655	0.0507187	0.750242	0.947831
ENSG00000229021	23.1695	0.00436331	0.0685387	0.634353	NA
ENSG00000163191	6921.16	-0.0733444	0.0573517	0.0788366	0.486636
ENSG00000182898	111.602	0.0198711	0.0702563	0.290655	0.756808
ENSG00000159450	770.284	-0.0614235	0.0853378	0.107735	0.549126
ENSG00000237975	7.99517	-0.000194987	0.0687575	0.967707	NA
ENSG00000197915	10.0366	-0.000381662	0.0686918	0.946853	NA
ENSG00000143631	89.5895	-0.00272177	0.0665092	0.877009	0.977385
ENSG00000163207	273.538	-0.0561733	0.088256	0.0969779	0.526939
ENSG00000163209	18.6785	-0.00612227	0.0688484	0.45913	NA
ENSG00000169469	20.3941	-0.0029233	0.0685669	0.714825	NA
ENSG00000241794	8.05889	-0.0119374	0.0703489	0.0153428	NA
ENSG00000159527	14.5493	-0.00149849	0.0685409	0.843434	NA
ENSG00000163218	141.92	-0.00250941	0.0650892	0.906455	0.982779
ENSG00000163220	11561.5	-0.246486	0.0640312	8.96013e-06	0.000919027
ENSG00000143546	1036.68	-0.499299	0.107433	1.64268e-07	2.56241e-05
ENSG00000184330	1087.06	-0.293776	0.12153	0.000754382	0.030698
ENSG00000143556	4387.08	-0.482207	0.0859137	1.03259e-09	2.71481e-07
ENSG00000238279	35.8613	0.0114604	0.0693594	0.321488	NA
ENSG00000197956	3447.87	-0.0397502	0.0604173	0.283492	0.752869
ENSG00000196420	13.8114	0.000970715	0.0685157	0.902683	NA
ENSG00000196154	3285.26	-0.12424	0.0694639	0.0113442	0.183653
ENSG00000188015	243.128	0.0235369	0.0690018	0.34399	0.78573
ENSG00000196754	465.927	-0.00896408	0.0614608	0.754737	0.949164
ENSG00000188643	14046.9	-0.0734398	0.0670111	0.0835257	0.496593
ENSG00000189334	7372.62	-0.0908787	0.0762811	0.0465574	0.387763
ENSG00000189171	692.694	-0.0198922	0.0605695	0.534193	0.877649
ENSG00000271853	73.3607	-0.00838626	0.0674689	0.615503	0.908358
ENSG00000160678	150.462	0.000161996	0.065204	0.996516	0.999016
ENSG00000272030	149.917	-0.0248951	0.0716048	0.241467	0.72006
ENSG00000160679	3640.39	-0.00747213	0.0467485	0.840458	0.969101
ENSG00000143553	769.805	-0.0139324	0.05795	0.669185	0.926061
ENSG00000143621	10957.4	0.00138088	0.0495125	0.968001	0.995507
ENSG00000169418	28.1847	-0.00060191	0.068126	0.952629	NA
ENSG00000143624	4773.1	-0.0015417	0.0454451	0.96299	0.995351
ENSG00000143554	893.385	-0.0659735	0.0786201	0.109175	0.552518
ENSG00000143614	5428.33	0.0584911	0.0544131	0.137908	0.601207
ENSG00000231827	23.662	0.0121949	0.0697902	0.225467	NA
ENSG00000223599	42.028	0.00754113	0.0682035	0.569737	NA
ENSG00000236327	14.7347	0.0171213	0.0717489	0.0249116	NA
ENSG00000198837	4472.69	-0.0206942	0.0486144	0.554915	0.886838
ENSG00000160741	2313.71	0.0301393	0.0578106	0.394936	0.815996
ENSG00000143570	7367.93	-0.0627627	0.0550307	0.110251	0.555099
ENSG00000282386	11.9917	-0.000679719	0.068614	0.918716	NA
ENSG00000273026	28.2827	0.0030475	0.0684703	0.732626	NA
ENSG00000143578	2230.43	-0.142194	0.0779546	0.00792432	0.147698
ENSG00000143543	4148.2	-0.0215668	0.0541981	0.538301	0.87974
ENSG00000272654	87.8596	-0.00693017	0.0675901	0.652833	0.919591
ENSG00000143545	716.248	-0.0732925	0.0947486	0.074976	0.476276
ENSG00000177954	4077.13	-0.103607	0.089489	0.0346139	0.335715
ENSG00000143552	26.2623	-0.00598741	0.0687018	0.516174	NA
ENSG00000143549	12704.3	0.00415113	0.0434195	0.867956	0.974738
ENSG00000264384	27.286	-0.0153691	0.0708734	0.100303	NA
ENSG00000143612	7420.49	0.0249066	0.0503642	0.492941	0.859293
ENSG00000143569	10593.3	0.0138774	0.0458704	0.687945	0.930186
ENSG00000143575	5581.73	0.0651654	0.0592564	0.103757	0.539123
ENSG00000143515	125.312	0.0202052	0.069353	0.342282	0.785053
ENSG00000160712	80.8801	0.0375208	0.0816993	0.0475016	0.389774
ENSG00000160714	2709.12	0.0566279	0.0597041	0.154773	0.625495
ENSG00000229780	40.3552	0.0160839	0.0708013	0.153206	NA
ENSG00000160716	47.5947	0.000365757	0.0678114	0.978005	NA
ENSG00000160710	14922.7	0.0208712	0.0448404	0.618983	0.909122
ENSG00000163344	671.34	-0.0823558	0.109358	0.0533638	0.409177
ENSG00000163346	799.405	-0.153387	0.110775	0.012922	0.196484
ENSG00000163348	3311.86	-0.0454753	0.0558645	0.228422	0.710114
ENSG00000271380	19.284	-0.0135436	0.0703202	0.138938	NA
ENSG00000160691	3278.61	-0.0569589	0.0561719	0.145968	0.614515
ENSG00000173207	957.226	0.00920608	0.059061	0.768483	0.952699
ENSG00000264349	14.4857	-0.00104724	0.0684745	0.895811	NA
ENSG00000160688	3057.07	-0.0035596	0.0508432	0.915476	0.985377
ENSG00000163352	17.0344	0.00302034	0.0686065	0.698706	NA
ENSG00000160685	4622.87	-0.0559784	0.063246	0.166439	0.64056
ENSG00000163354	144.564	-0.00858649	0.0659575	0.683877	0.928794
ENSG00000163357	86.9266	-0.0129583	0.068157	0.466257	0.848497
ENSG00000232093	171.104	0.0112682	0.0654051	0.632592	0.913409
ENSG00000143537	8822.57	-0.1493	0.0584958	0.00144327	0.0488117
ENSG00000243364	692.967	-0.00457815	0.0577554	0.882605	0.978385
ENSG00000143590	193.828	-0.0872573	0.150967	0.0205585	0.253804
ENSG00000169242	2570.79	0.0844165	0.0743335	0.0621894	0.437129
ENSG00000169241	3335.58	-0.00699973	0.0492287	0.838754	0.969101
ENSG00000179085	540.779	-0.0166216	0.065018	0.531884	0.876138
ENSG00000163463	1094.28	-0.0249871	0.0576276	0.378907	0.807402
ENSG00000163462	122.716	-0.00394161	0.0662898	0.832279	0.967489
ENSG00000185499	7232.64	-0.0837531	0.0710424	0.0552691	0.414502
ENSG00000279986	13.7743	0.00207384	0.0685454	0.793119	NA
ENSG00000279487	229.323	-0.0964555	0.162695	0.0232498	0.270637
ENSG00000231064	93.1254	-0.0125644	0.0682242	0.464889	0.84732
ENSG00000169231	953.675	-0.0060664	0.0565401	0.851439	0.971628
ENSG00000173171	475.296	0.0105972	0.0604933	0.724845	0.940683
ENSG00000160766	786.522	0.00702145	0.0576432	0.826892	0.966775
ENSG00000236675	251.142	0.00701616	0.0637436	0.780397	0.956191
ENSG00000177628	3211.29	-0.077168	0.0642769	0.0696097	0.459007
ENSG00000160767	3397.44	-0.0908319	0.0748269	0.0501986	0.399656
ENSG00000116521	4511.76	-0.0408192	0.053894	0.251848	0.726392
ENSG00000176444	1738.78	-0.0207524	0.0598876	0.525929	0.873674
ENSG00000143630	542.614	-0.00391393	0.0610292	0.888942	0.979868
ENSG00000160752	5360.84	-0.0762184	0.0775095	0.0789414	0.486654
ENSG00000225855	621.296	-0.0515713	0.0779234	0.153015	0.623413
ENSG00000160753	2156.55	-0.0778146	0.0663216	0.072346	0.469707
ENSG00000116539	8307.04	0.063928	0.0547259	0.106385	0.545403
ENSG00000227773	10.1117	0.00724294	0.0691961	0.279245	NA
ENSG00000237872	33.0465	0.00633498	0.068393	0.58151	NA
ENSG00000235919	46.5383	-0.0107791	0.0687336	0.43213	NA
ENSG00000271267	24.884	-0.0106891	0.0694662	0.276154	NA
ENSG00000223503	10.4611	0.00042961	0.0686114	0.951923	NA
ENSG00000125459	955.398	0.00308046	0.0550234	0.926846	0.987867
ENSG00000246203	72.1703	-0.0106932	0.0679054	0.523361	0.873256
ENSG00000163374	5107.31	0.157542	0.0793889	0.00495498	0.112255
ENSG00000132676	4295.4	0.0275938	0.0536281	0.464642	0.847139
ENSG00000203761	264.337	-0.0124367	0.0656909	0.586398	0.89804
ENSG00000116580	4248.18	0.0295581	0.0501239	0.410381	0.821575
ENSG00000234937	40.2751	0.00336704	0.0678671	0.791047	NA
ENSG00000132718	179.626	-0.0374125	0.0783025	0.128548	0.589049
ENSG00000143622	641.216	0.0554211	0.0791151	0.13778	0.601207
ENSG00000132680	2910.35	0.0192797	0.0552508	0.572593	0.892259
ENSG00000207475	9.86204	-0.00575818	0.0690478	0.336826	NA
ENSG00000173080	15.509	-0.00827881	0.0692304	0.295342	NA
ENSG00000116584	9013.11	0.245269	0.0796157	0.000142402	0.00884845
ENSG00000273002	84.263	0.0225465	0.0714361	0.231867	0.713964
ENSG00000224276	6.06454	0.00333424	0.0689469	0.428689	NA
ENSG00000163479	11077.2	-0.0525256	0.0477085	0.16806	0.64255
ENSG00000160803	6401.53	0.0164255	0.0526308	0.51475	0.86861
ENSG00000116586	425.649	-0.0148899	0.0622986	0.61121	0.907388
ENSG00000132698	3781.78	-0.0332913	0.0580932	0.353281	0.792602
ENSG00000254726	2468.55	-0.0441736	0.0630414	0.258224	0.730246
ENSG00000160789	19878.5	-0.0220484	0.0544082	0.539585	0.880686
ENSG00000196189	1138.22	-0.0692296	0.0767408	0.102832	0.537416
ENSG00000160785	2581.9	-0.0468738	0.0611273	0.21946	0.700579
ENSG00000260238	46.1646	-0.0135202	0.0699909	0.222591	NA
ENSG00000160783	719.781	-0.0175342	0.0615279	0.571687	0.892259
ENSG00000242252	30.5736	-0.00463073	0.0684801	0.631483	NA
ENSG00000160781	523.82	-0.192937	0.135071	0.00803892	0.148719
ENSG00000198952	14349.2	-0.0202387	0.0487466	0.571737	0.892259
ENSG00000163472	1133.02	-0.0330556	0.0603141	0.308598	0.767336
ENSG00000198715	913.936	-0.0322643	0.0613148	0.355737	0.79356
ENSG00000163468	14795.1	-0.0102811	0.0452168	0.76351	0.951658
ENSG00000163467	81.3148	0.026339	0.0739813	0.131574	0.594009
ENSG00000125462	41.8058	0.000637664	0.0681245	0.953739	NA
ENSG00000116604	4748.81	-0.0091545	0.055822	0.730855	0.942684
ENSG00000183856	5737.59	-0.0688198	0.0805011	0.098903	0.530267
ENSG00000163382	3374.54	0.00583851	0.0526092	0.864969	0.974123
ENSG00000160818	1612.47	0.00486365	0.0541706	0.898452	0.981614
ENSG00000280316	31.4597	-0.013047	0.0697554	0.262468	NA
ENSG00000272068	22.9243	-0.00727744	0.0688667	0.436516	NA
ENSG00000132692	40.6225	-0.00664482	0.0682873	0.585443	NA
ENSG00000272405	87.4935	0.00575435	0.0670711	0.733539	0.943878
ENSG00000229953	44.0193	-0.00912966	0.0684384	0.498325	NA
ENSG00000132688	424.333	-0.0250407	0.0695017	0.321024	0.772758
ENSG00000237588	24.3218	-0.00414209	0.0683204	0.690188	NA
ENSG00000143320	15423.5	-0.0122376	0.0528698	0.697209	0.933396
ENSG00000223356	59.0348	0.00621336	0.0677137	0.671712	0.926422
ENSG00000143319	3332.98	0.0576004	0.0589336	0.154889	0.625495
ENSG00000143303	1575.91	-0.0100895	0.0529194	0.732235	0.943533
ENSG00000143314	1133.98	-0.0246918	0.0590603	0.469764	0.849911
ENSG00000143321	12868.1	-0.00758386	0.0498348	0.806344	0.963006
ENSG00000143294	4632.51	0.024491	0.0533462	0.49025	0.858738
ENSG00000027869	31.6891	0.00394662	0.0683806	0.69398	NA
ENSG00000160838	23.1343	0.00374437	0.0684673	0.687335	NA
ENSG00000132694	4569.07	0.0072334	0.0470289	0.83623	0.968263
ENSG00000117036	2326.53	0.0260774	0.053835	0.462014	0.845918
ENSG00000235700	18.4469	0.0113946	0.0699524	0.129121	NA
ENSG00000183853	7146.98	0.0954342	0.0621257	0.0300975	0.313767
ENSG00000226520	38.0532	-0.00650773	0.0683336	0.583174	NA
ENSG00000158716	548.274	-0.00718323	0.0625919	0.76732	0.952392
ENSG00000188004	30.008	0.00411301	0.0681786	0.719073	NA
ENSG00000243284	15.3922	-0.00461944	0.068708	0.562727	NA
ENSG00000272668	8.87243	-0.00554083	0.0689912	0.381136	NA
ENSG00000213085	13.1327	0.00658838	0.0690118	0.378674	NA
ENSG00000158710	15102.2	0.00556493	0.0493984	0.897356	0.981614
ENSG00000085552	2270.92	-0.13626	0.076724	0.00953052	0.16634
ENSG00000224259	1998.51	-0.00356675	0.0519613	0.912747	0.984548
ENSG00000273933	81.3207	0.0338911	0.0786269	0.0730567	0.47142
ENSG00000177807	39.2561	-0.00671194	0.0686805	0.502101	NA
ENSG00000260766	95.2541	0.000995261	0.0670422	0.951362	0.992097
ENSG00000143315	1088.4	-0.0414482	0.0654435	0.255299	0.728988
ENSG00000225279	48.3391	0.0195816	0.0717204	0.144118	0.611378
ENSG00000162728	48.0619	0.00512794	0.0680901	0.677709	0.927331
ENSG00000162729	1897.61	-0.087411	0.0724086	0.0537836	0.410086
ENSG00000018625	19.5379	0.0147675	0.0710352	0.0261217	NA
ENSG00000227741	66.1987	-0.0118086	0.0685759	0.442594	0.837808
ENSG00000162734	7338.73	0.0242764	0.0544742	0.490814	0.858738
ENSG00000132716	2610.4	-0.00962154	0.0517687	0.774423	0.954477
ENSG00000228606	47.2079	-0.00283496	0.0676666	0.830946	NA
ENSG00000162735	2141.62	0.0312234	0.056887	0.381584	0.807743
ENSG00000122218	16641.2	0.030192	0.0499561	0.432952	0.834109
ENSG00000235082	15.9445	0.00470474	0.0687173	0.558876	NA
ENSG00000202078	12.8552	0.00586333	0.0689507	0.413358	NA
ENSG00000162736	5005.67	-0.0148781	0.049254	0.569842	0.891507
ENSG00000171786	22.2529	0.00846428	0.0690731	0.368018	NA
ENSG00000162738	330.145	-0.0232927	0.066629	0.410867	0.821655
ENSG00000026751	25.9838	-0.000747204	0.0682001	0.937189	NA
ENSG00000158769	4880.48	-0.0130895	0.0505341	0.709465	0.936459
ENSG00000270149	154.35	-0.0112982	0.0671135	0.563695	0.888672
ENSG00000232879	13.1264	-0.00196974	0.0686194	0.780184	NA
ENSG00000215845	554.991	-0.043883	0.0784578	0.157564	0.6285
ENSG00000158773	1676.34	-0.0647781	0.0664988	0.116792	0.569324
ENSG00000186517	326.038	0.0153541	0.0647091	0.563111	0.888454
ENSG00000143217	5044.74	-0.0527779	0.0573279	0.170882	0.645842
ENSG00000228917	120.543	-0.0601072	0.104821	0.0265893	0.292435
ENSG00000162755	20.5291	-0.000861148	0.0684884	0.912058	NA
ENSG00000143256	348.998	-0.0161152	0.065628	0.525927	0.873674
ENSG00000158793	1101.36	-0.00660975	0.0540528	0.843933	0.969303
ENSG00000158796	2157.67	0.0321864	0.055873	0.341193	0.784908
ENSG00000143222	2807.88	-0.0236487	0.0595957	0.482404	0.856233
ENSG00000143258	1318.76	0.00513616	0.0532962	0.881699	0.97796
ENSG00000143224	487.77	-0.0615653	0.0887716	0.0989086	0.530267
ENSG00000158850	1630.68	0.00707597	0.0514331	0.837824	0.969101
ENSG00000158859	66.5073	0.00681163	0.0677167	0.649338	0.918123
ENSG00000158864	1849.33	-0.113949	0.0911766	0.0279575	0.300289
ENSG00000158882	417.93	-0.0167568	0.0654132	0.526481	0.873674
ENSG00000143257	30.7992	0.009542	0.0689341	0.407165	NA
ENSG00000143252	5012.29	-0.0325965	0.0512136	0.379119	0.807402
ENSG00000283696	24.8069	-0.0157264	0.070953	0.102223	NA
ENSG00000132185	9.06139	3.14335	1.10587	0.000280121	NA
ENSG00000162746	23.3853	-0.0112667	0.0696244	0.244259	NA
ENSG00000081721	713.087	0.0576468	0.076449	0.137606	0.601207
ENSG00000118217	4504.54	0.123146	0.0667947	0.0105686	0.176242
ENSG00000229808	19.339	0.00908794	0.0692156	0.323689	NA
ENSG00000162745	35.029	-0.000369496	0.0680468	0.971254	NA
ENSG00000198929	390.736	0.00465194	0.0625965	0.861976	0.973376
ENSG00000254706	8.60015	-0.00375133	0.0688471	0.526394	NA
ENSG00000239887	674.495	-0.0103022	0.0594007	0.740023	0.945364
ENSG00000171722	23.6163	-0.00320117	0.068498	0.711875	NA
ENSG00000152332	8899.96	0.0421111	0.0485546	0.250457	0.725776
ENSG00000117143	1761.02	-0.00712773	0.0530363	0.829997	0.967197
ENSG00000272574	15.8786	-0.00260201	0.0686057	0.728025	NA
ENSG00000162733	117.666	1.79369	0.242924	7.70035e-15	5.81566e-12
ENSG00000132196	1160.79	0.0166551	0.0547164	0.629015	0.911776
ENSG00000143248	56.359	-0.00683419	0.0678855	0.630206	0.912084
ENSG00000232995	94.4581	-0.00680885	0.0668631	0.704576	0.935271
ENSG00000143228	567.431	0.0176758	0.065858	0.496165	0.862013
ENSG00000185630	9916.78	-0.0671602	0.0553525	0.0902782	0.511508
ENSG00000207082	14.3892	-0.00716352	0.0691246	0.320176	NA
ENSG00000269887	38.0771	0.019515	0.0719093	0.117172	NA
ENSG00000276359	20.9254	-0.0092314	0.0692259	0.321396	NA
ENSG00000233693	40.5765	0.0139361	0.0701606	0.201334	NA
ENSG00000271917	18.0713	0.00401514	0.0687029	0.598272	NA
ENSG00000143198	846.876	-0.208155	0.112596	0.0038482	0.0965272
ENSG00000143149	2330.23	0.00828773	0.0491341	0.810648	0.963832
ENSG00000230175	13.5201	-0.00594783	0.0689207	0.426167	NA
ENSG00000225272	17.1194	0.0127283	0.0702645	0.104665	NA
ENSG00000143183	3734.16	-0.0361532	0.0535285	0.310087	0.767427
ENSG00000224358	33.4226	0.00943534	0.0689623	0.401209	NA
ENSG00000143179	4616.44	-0.00279357	0.0466702	0.971076	0.995677
ENSG00000236364	103.975	-0.00156315	0.0684445	0.850924	0.971628
ENSG00000143157	6293.25	-0.0152559	0.0496685	0.639125	0.914184
ENSG00000152382	929.217	-0.016387	0.0578154	0.617794	0.908926
ENSG00000225171	16.6502	-0.000235716	0.0684483	0.975494	NA
ENSG00000198842	15.6162	-0.00859044	0.0692541	0.294252	NA
ENSG00000272205	11.492	0.00154034	0.068635	0.823485	NA
ENSG00000143190	2228.44	-0.0111304	0.0531168	0.738479	0.945364
ENSG00000198821	11.312	0.00968937	0.069682	0.12723	NA
ENSG00000143162	10611.9	-0.0540453	0.0638232	0.169895	0.644356
ENSG00000241666	10.6792	0.00269694	0.068743	0.668334	NA
ENSG00000198771	834.097	0.000423534	0.0563054	0.992462	0.998182
ENSG00000197965	10486.7	-0.0273505	0.0482805	0.454705	0.843179
ENSG00000143199	33.9369	0.0341901	0.0809447	0.00891371	NA
ENSG00000232194	17.5535	0.00509629	0.0687693	0.522033	NA
ENSG00000143158	695.686	-0.0945501	0.0997814	0.0485974	0.391472
ENSG00000143164	4229.14	0.016801	0.0502752	0.622822	0.910363
ENSG00000143147	1046.12	-0.0162698	0.0584047	0.618992	0.909122
ENSG00000143155	2212.95	0.00499594	0.0498924	0.885555	0.979408
ENSG00000213064	14357.9	-0.0509711	0.0530626	0.150577	0.619731
ENSG00000143178	149.862	0.014849	0.067563	0.479307	0.855305
ENSG00000143153	9029.44	-0.012212	0.0495905	0.759152	0.950376
ENSG00000143156	241.534	0.0271616	0.0700099	0.301398	0.762486
ENSG00000117475	1434.59	0.0299821	0.0582286	0.404728	0.818863
ENSG00000117477	33.9718	0.000713196	0.0680822	0.952085	NA
ENSG00000117479	1520.35	-0.0432295	0.0604824	0.252157	0.726592
ENSG00000234604	26.1753	0.00869545	0.0691537	0.340068	NA
ENSG00000213062	57.1596	0.0110336	0.0684595	0.467417	0.84864
ENSG00000000460	1451.41	0.00703605	0.0565245	0.828765	0.967021
ENSG00000171806	239.531	0.0353669	0.0741728	0.20347	0.685482
ENSG00000000457	959.195	0.063926	0.073381	0.120741	0.576783
ENSG00000239494	11.9118	-0.000200805	0.0685664	0.975933	NA
ENSG00000075945	1153.03	-0.0372385	0.0656731	0.303733	0.763794
ENSG00000120370	887.612	0.286643	0.100362	0.000240329	0.0130396
ENSG00000117501	12.0551	-0.00232125	0.0686644	0.73319	NA
ENSG00000007933	24.5962	0.00834036	0.0690682	0.368226	NA
ENSG00000117507	752.558	-0.0748242	0.102428	0.0638696	0.442796
ENSG00000094963	53.4822	-0.0382971	0.0836835	0.0162512	0.224641
ENSG00000225243	13.7781	-0.00843881	0.0693643	0.229197	NA
ENSG00000076258	197.869	0.0132266	0.0663633	0.558127	0.888319
ENSG00000117523	26562	0.00443457	0.0415493	0.892772	0.980004
ENSG00000117533	441.526	0.0455235	0.0767154	0.163645	0.636262
ENSG00000010165	3081.64	-0.120461	0.0712447	0.0143965	0.209364
ENSG00000197959	166.869	0.0782898	0.140445	0.0141261	0.207187
ENSG00000135845	1129.61	0.0171952	0.0573283	0.609083	0.906744
ENSG00000094975	3081.69	0.000813284	0.0516879	0.704602	0.935271
ENSG00000120337	11.508	0.0111421	0.0699434	0.114233	NA
ENSG00000117586	54.0491	0.688461	0.481788	0.00298522	0.0809849
ENSG00000203739	106.623	0.0196567	0.0694554	0.3408	0.784908
ENSG00000117592	7115.11	0.0588417	0.0641486	0.148234	0.61557
ENSG00000183831	9.94106	0.00280895	0.0687649	0.647845	NA
ENSG00000076321	928.902	0.0416113	0.0695552	0.234801	0.716119
ENSG00000120334	815.957	0.0593937	0.0776893	0.127684	0.589049
ENSG00000117593	2972.4	0.00245604	0.0505434	0.775663	0.955155
ENSG00000270084	128.685	-0.00538954	0.0664245	0.772447	0.954436
ENSG00000234741	5365.55	-0.0305896	0.0492926	0.391496	0.814391
ENSG00000185278	1545.97	-0.0352273	0.0595894	0.349887	0.790143
ENSG00000117601	11.1354	-0.000728467	0.0686116	0.913313	NA
ENSG00000135870	3502.05	0.00969225	0.0482641	0.796881	0.959488
ENSG00000236535	11.6055	0.00798228	0.069282	0.256589	NA
ENSG00000227373	9.40445	0.00470205	0.068952	0.415475	NA
ENSG00000152061	3443.31	-0.029625	0.054327	0.435841	0.835081
ENSG00000203737	24.0493	0.0100063	0.0695659	0.212861	NA
ENSG00000229531	14.2097	-0.012908	0.070288	0.108733	NA
ENSG00000116161	3021.95	-0.00323086	0.0514649	0.923504	0.987327
ENSG00000120333	519.782	-0.0868549	0.108046	0.0531253	0.408394
ENSG00000235750	2212.69	0.171344	0.10507	0.00765666	0.144812
ENSG00000227740	26.2928	0.00708748	0.0687988	0.463635	NA
ENSG00000230777	18.9783	0.00396031	0.068557	0.651599	NA
ENSG00000143207	2611.34	0.0218635	0.0504761	0.536011	0.878485
ENSG00000252906	23.3004	-0.00377304	0.0684867	0.677548	NA
ENSG00000236021	21.439	-0.00181977	0.0683816	0.838458	NA
ENSG00000152092	43.1755	-0.0242958	0.0740448	0.0691862	NA
ENSG00000198797	383.227	-0.0649547	0.0951993	0.0799766	0.48887
ENSG00000254154	33.6462	-0.0132516	0.0698668	0.243837	NA
ENSG00000242193	448.924	-0.00976804	0.0619014	0.735032	0.944498
ENSG00000224687	146.034	0.0373306	0.0794936	0.100295	0.533136
ENSG00000075391	7743.25	0.192991	0.0666426	0.000354522	0.0177557
ENSG00000270575	25.33	-0.00375247	0.0683718	0.70274	NA
ENSG00000213058	14.1198	-0.000752173	0.0685905	0.912947	NA
ENSG00000213057	34.4399	-0.00112172	0.0680653	0.91674	NA
ENSG00000273062	32.5573	-0.00199292	0.0679886	0.8613	NA
ENSG00000116191	1758.79	0.0521524	0.0601161	0.182409	0.658847
ENSG00000228196	11.869	-0.00284213	0.0686652	0.687964	NA
ENSG00000116194	62.5713	-0.012894	0.068986	0.386559	0.810817
ENSG00000116199	8631.06	-0.037261	0.0490789	0.302845	0.763764
ENSG00000232750	25.113	-0.00774121	0.068862	0.434528	NA
ENSG00000186283	2678.16	-0.0737857	0.0639233	0.0790476	0.486654
ENSG00000143322	5266.23	0.0840611	0.062828	0.0514272	0.404264
ENSG00000231905	33.6096	0.00230516	0.0681673	0.82977	NA
ENSG00000231564	12.1294	-0.00598365	0.0690557	0.337104	NA
ENSG00000225711	21.2359	0.0109183	0.0696024	0.240635	NA
ENSG00000057252	3090.36	-0.0564039	0.0658171	0.157037	0.628106
ENSG00000162779	14.7902	0.00197046	0.0686646	0.77065	NA
ENSG00000227141	44.3226	-0.0161991	0.0704244	0.22039	NA
ENSG00000261060	14.846	0.000737901	0.0685179	0.925848	NA
ENSG00000162782	274.318	-0.0173464	0.0657652	0.502054	0.863826
ENSG00000231966	23.5044	0.0131409	0.0700347	0.200931	NA
ENSG00000169905	8666.66	0.0230113	0.046903	0.496075	0.862002
ENSG00000272906	17.5772	-0.0127039	0.0701824	0.131268	NA
ENSG00000143337	4252.34	-0.0218984	0.0504702	0.533449	0.876979
ENSG00000260360	9.87241	-0.00249911	0.0687396	0.684747	NA
ENSG00000135837	7346.51	0.0295567	0.053148	0.584805	0.897097
ENSG00000235145	23.9072	-0.0133982	0.0701794	0.172731	NA
ENSG00000223450	22.8049	0.00102015	0.0684792	0.901805	NA
ENSG00000116260	7847.6	-0.099269	0.0579937	0.0213392	0.260188
ENSG00000121454	610.718	0.037	0.0690467	0.340371	0.784766
ENSG00000230124	1931.33	0.0305288	0.0543994	0.399783	0.817416
ENSG00000235060	11.822	0.000791445	0.0686648	0.902615	NA
ENSG00000143324	2981.1	0.0433921	0.0557361	0.251546	0.726288
ENSG00000225857	11.6027	-0.000600505	0.0686765	0.920169	NA
ENSG00000135835	394.128	-0.0123671	0.061154	0.65997	0.922184
ENSG00000243155	114.13	0.00478756	0.0658178	0.814205	0.964268
ENSG00000232586	33.9625	-0.000158493	0.0680044	0.986916	NA
ENSG00000251520	85.0872	-0.00674267	0.0670548	0.695364	0.933093
ENSG00000270711	84.6362	-0.00676215	0.0671585	0.688614	0.930186
ENSG00000135823	3273.57	-0.000451478	0.0470082	0.988882	0.998182
ENSG00000153029	2221.76	-0.00153681	0.051127	0.965577	0.99536
ENSG00000162783	4760.66	-0.0100344	0.0558276	0.762027	0.951658
ENSG00000237292	30.3509	0.0116526	0.0695666	0.274085	NA
ENSG00000179930	26.1412	-0.00937933	0.0691102	0.361194	NA
ENSG00000224810	18.3946	-0.00603623	0.0688734	0.449768	NA
ENSG00000228918	27.451	0.0130315	0.0698919	0.232508	NA
ENSG00000135821	10274.3	-0.122934	0.0648106	0.00936991	0.164425
ENSG00000203730	19.9486	5.63875e-05	0.0683952	0.995753	NA
ENSG00000135828	407.887	0.00142348	0.060827	0.90561	0.982779
ENSG00000143333	154.435	0.991544	0.197046	2.17441e-08	4.01997e-06
ENSG00000261504	12.9481	0.0029769	0.0686213	0.697736	NA
ENSG00000135838	197.326	0.039639	0.0790579	0.1336	0.596574
ENSG00000135829	13038.2	0.0409433	0.050881	0.281518	0.751735
ENSG00000135862	4997.66	0.051458	0.0589297	0.183994	0.661379
ENSG00000224468	16.7609	0.00307611	0.0687035	0.65865	NA
ENSG00000058085	1238.66	0.0442341	0.070027	0.219216	0.700397
ENSG00000157064	131.636	0.0587164	0.102607	0.0295608	0.310419
ENSG00000232860	106.974	0.0161941	0.0684712	0.411057	0.821655
ENSG00000116698	11188.9	0.0286577	0.0484218	0.425107	0.829968
ENSG00000116701	41.2934	-0.0110138	0.0688485	0.4134	NA
ENSG00000162704	6171.42	-0.0271606	0.0471787	0.509178	0.86716
ENSG00000143344	1019.67	-0.0119214	0.0578755	0.71115	0.937097
ENSG00000198756	710.355	0.575788	0.102679	1.03335e-09	2.71481e-07
ENSG00000198860	2474.13	0.0935335	0.0810688	0.0479093	0.390176
ENSG00000116667	1551.15	0.00727113	0.0561288	0.811322	0.963944
ENSG00000230470	10.8324	0.00238274	0.0688341	0.633288	NA
ENSG00000232036	10.9438	-0.00418161	0.0688819	0.480699	NA
ENSG00000116406	4610.98	-0.022166	0.0509224	0.540995	0.881734
ENSG00000135842	4267.8	0.373927	0.0836486	4.46531e-07	6.36838e-05
ENSG00000121481	869.624	0.0763425	0.0856352	0.0800052	0.48887
ENSG00000121486	1216.99	0.0703984	0.0914858	0.0842908	0.498317
ENSG00000116668	321.334	0.0493219	0.0848725	0.103835	0.539156
ENSG00000231084	17.1967	0.00111404	0.068504	0.890032	NA
ENSG00000279838	51.3198	-0.0214955	0.0726536	0.101543	0.535424
ENSG00000116679	6827.11	0.0235569	0.048412	0.510559	0.867369
ENSG00000273004	17.2788	0.00513028	0.0686915	0.550934	NA
ENSG00000261024	9.17596	0.00515531	0.0689468	0.417176	NA
ENSG00000143341	148.811	0.00931487	0.066579	0.641448	0.914669
ENSG00000047410	10334.2	0.0425512	0.0465537	0.229678	0.710811
ENSG00000157181	1372.44	0.0466494	0.062795	0.235891	0.717137
ENSG00000262180	37.4572	0.00447869	0.068236	0.688609	NA
ENSG00000229739	13.3175	0.00975512	0.0695915	0.185676	NA
ENSG00000116703	19.8656	-0.00259543	0.0685312	0.748598	NA
ENSG00000162670	10.6733	-0.00423331	0.0688686	0.490779	NA
ENSG00000127074	7.44838	-0.00222541	0.0688342	0.644299	NA
ENSG00000116741	369.781	-0.0470837	0.0806056	0.134599	0.598107
ENSG00000234473	14.1142	0.00316649	0.0685737	0.69814	NA
ENSG00000116750	1756.27	0.0604542	0.067913	0.137279	0.601207
ENSG00000116747	5216.7	0.0195796	0.0495405	0.576364	0.894025
ENSG00000272579	220.543	-0.0239761	0.0678952	0.374831	0.80461
ENSG00000023572	729.331	-0.0350222	0.0673474	0.295129	0.759392
ENSG00000134371	3194.42	0.0933767	0.0636433	0.035113	0.337929
ENSG00000162630	68.1742	-0.00396121	0.0675368	0.78066	0.956191
ENSG00000000971	42.7266	0.00738627	0.0683547	0.555969	NA
ENSG00000134365	34.2382	0.0121912	0.0696211	0.274548	NA
ENSG00000066279	7540.22	-0.00094458	0.05416	0.998772	0.999581
ENSG00000235748	26.0821	0.00457935	0.0685341	0.623994	NA
ENSG00000177888	3106.34	0.0187539	0.0502595	0.563666	0.888672
ENSG00000134376	10.0819	-0.00125437	0.0686683	0.842824	NA
ENSG00000213047	2436.09	0.033138	0.0591843	0.386901	0.811184
ENSG00000213046	33.8928	0.000580812	0.0681336	0.957683	NA
ENSG00000235582	10.2978	-0.000838349	0.0687328	0.877098	NA
ENSG00000224901	8.28958	-0.00365527	0.0688448	0.532016	NA
ENSG00000203724	125.595	-0.01973	0.0690736	0.356976	0.794597
ENSG00000151414	3087.46	0.0376127	0.0543886	0.309585	0.767336
ENSG00000081237	10.3106	0.00253464	0.0688101	0.639399	NA
ENSG00000229989	193.134	-0.0350684	0.0770756	0.135989	0.599137
ENSG00000207975	14.3799	0.00182681	0.0685961	0.804027	NA
ENSG00000203721	135.577	-0.0078808	0.0657722	0.700481	0.934558
ENSG00000213045	11.0965	-0.0056816	0.0689373	0.418247	NA
ENSG00000230623	21.1395	0.0148144	0.0706116	0.13317	NA
ENSG00000162702	2111.69	0.103085	0.0856192	0.0369202	0.345118
ENSG00000118193	1933.79	0.0251704	0.0614044	0.438431	0.836156
ENSG00000118197	1512.8	0.0474929	0.068183	0.204849	0.686553
ENSG00000260088	29.1126	0.000457997	0.0681561	0.966566	NA
ENSG00000118200	5651.66	-0.00149206	0.0503961	0.969417	0.995518
ENSG00000231333	10.054	0.00496333	0.0690389	0.322548	NA
ENSG00000163362	1847.35	-0.0357195	0.0568285	0.331323	0.77889
ENSG00000116852	2226.28	0.001818	0.0488429	0.958731	0.99445
ENSG00000116857	2664.11	-0.0196019	0.0517946	0.542266	0.88212
ENSG00000081277	46.6429	0.0199319	0.0718964	0.134721	NA
ENSG00000118194	118.408	0.00334561	0.0661754	0.850948	0.971628
ENSG00000159166	6326.04	-0.0324001	0.0618984	0.40634	0.819272
ENSG00000282221	57.4073	-0.00324271	0.067286	0.829103	0.967078
ENSG00000159173	100.482	-0.0427224	0.0853772	0.0476592	0.390105
ENSG00000174307	2483.72	0.00428821	0.0648947	0.850356	0.971628
ENSG00000159176	7312.35	0.0241436	0.0565868	0.484584	0.856754
ENSG00000224536	74.9017	0.0013218	0.0671506	0.932803	0.98928
ENSG00000223396	54.0269	-0.0101786	0.068591	0.447884	0.839834
ENSG00000134369	5479.58	0.0807764	0.0608827	0.056108	0.417025
ENSG00000231871	55.0285	-0.00677602	0.067866	0.634117	0.913672
ENSG00000235121	21.1265	-0.00863786	0.0690968	0.357716	NA
ENSG00000198700	9495.17	-0.00794632	0.0438077	0.825405	0.966775
ENSG00000277681	16.0322	0.0046012	0.0686982	0.570768	NA
ENSG00000198892	494.497	0.0342448	0.0684778	0.289212	0.756808
ENSG00000163431	18.8601	-0.00952707	0.0694037	0.260413	NA
ENSG00000134375	1497.43	-0.00881759	0.0538539	0.703981	0.935018
ENSG00000176393	5535.89	-0.0368695	0.0523901	0.312207	0.768516
ENSG00000273478	114.791	-0.00351911	0.0661911	0.857718	0.972255
ENSG00000234678	174.823	0.0768725	0.127163	0.0281612	0.301009
ENSG00000275207	12.7777	0.00157485	0.0686671	0.81131	NA
ENSG00000163435	9645.56	-0.079249	0.0534521	0.0472414	0.388798
ENSG00000249007	64.3126	-0.0254405	0.074347	0.0812252	0.492677
ENSG00000170075	109.724	0.00507234	0.0661843	0.79387	0.959488
ENSG00000143862	1868.15	-0.0153262	0.0560108	0.631234	0.912918
ENSG00000143851	42.3403	-0.0137351	0.0695225	0.314188	NA
ENSG00000243323	32.1526	0.00527283	0.0684568	0.610496	NA
ENSG00000133067	241.985	-0.0685103	0.111278	0.037941	0.351154
ENSG00000077152	892.102	-0.0455754	0.067532	0.211375	0.693263
ENSG00000077157	2529.07	0.0457037	0.0596139	0.23262	0.713964
ENSG00000232626	31.8799	-0.0126576	0.0697651	0.250393	NA
ENSG00000143858	71.6348	-0.0152662	0.0691621	0.36371	0.798637
ENSG00000117139	7362.45	0.0729177	0.0608908	0.079067	0.486654
ENSG00000226148	48.3425	-0.00940101	0.0688472	0.423609	0.829404
ENSG00000228288	211.127	-0.0218253	0.0678763	0.389174	0.81308
ENSG00000184774	29.0881	-0.0183772	0.0718425	0.0751021	NA
ENSG00000214796	720.201	-0.350939	0.11566	0.000120625	0.00762178
ENSG00000234996	66.9515	-0.047598	0.0922818	0.015738	0.219434
ENSG00000183155	1199.06	-0.0188265	0.0559615	0.583988	0.896933
ENSG00000117153	1367.39	-0.0641647	0.0730829	0.119409	0.573861
ENSG00000230280	58.4581	-0.00549105	0.0679276	0.677237	0.927304
ENSG00000159346	9500.87	0.00430405	0.0480083	0.901049	0.982233
ENSG00000159348	1137.98	-0.0397786	0.0622094	0.281714	0.751991
ENSG00000163444	4970.29	0.0263424	0.051323	0.467124	0.848518
ENSG00000143847	75.8186	0.0194445	0.0714931	0.168619	0.643264
ENSG00000163485	1743.74	-0.103938	0.086387	0.0346994	0.335891
ENSG00000224671	12.542	0.0117147	0.070026	0.122341	NA
ENSG00000133055	47.9228	-0.00530582	0.0678917	0.689153	0.93045
ENSG00000133048	323.388	-0.00234853	0.0638949	0.921254	0.987246
ENSG00000159388	153.217	-0.0983568	0.20173	0.0114376	0.184567
ENSG00000188783	10.0925	-0.000969413	0.0686787	0.873848	NA
ENSG00000058668	5295.42	0.0132025	0.0500661	0.713626	0.937706
ENSG00000236035	11.9283	0.000707212	0.0686765	0.911324	NA
ENSG00000058673	8511.82	0.0399401	0.047487	0.27111	0.742078
ENSG00000257315	1356.01	0.00762184	0.0549758	0.821	0.966091
ENSG00000227417	57.6885	-0.00834398	0.0680714	0.56319	0.888454
ENSG00000223505	21.4134	-0.00432649	0.0685988	0.615987	NA
ENSG00000182004	1109.82	-0.0610617	0.0798674	0.118489	0.571948
ENSG00000236430	21.3723	-0.00438608	0.068444	0.652656	NA
ENSG00000143842	3592.82	-0.0420025	0.0561234	0.260857	0.732345
ENSG00000143845	331.378	0.0312339	0.0707641	0.271593	0.742307
ENSG00000143839	21.0358	0.00407588	0.0684253	0.677007	NA
ENSG00000174567	13.3737	0.00145492	0.0685839	0.843634	NA
ENSG00000143850	12420.2	-0.00118798	0.0443257	0.981234	0.997621
ENSG00000231691	72.6186	-0.00633274	0.0671485	0.704685	0.935271
ENSG00000226330	14.4399	-0.00302018	0.0686943	0.66211	NA
ENSG00000237848	13.5246	0.0196089	0.0727975	0.00887574	NA
ENSG00000158615	8229.7	0.079545	0.0545517	0.0491484	0.394214
ENSG00000133056	2983.25	-0.0763143	0.0614057	0.0693974	0.458617
ENSG00000198625	3630.26	0.0167137	0.0559085	0.62325	0.910384
ENSG00000236779	16.9593	0.00221608	0.0684525	0.798722	NA
ENSG00000170382	297.307	0.190622	0.203947	0.0116646	0.186224
ENSG00000163531	89.1192	0.0312803	0.0762587	0.114154	0.563062
ENSG00000184144	17.7805	0.0100789	0.0694834	0.251343	NA
ENSG00000174529	91.3918	-0.000140451	0.0663128	0.992528	0.998182
ENSG00000117222	2083.24	0.0445016	0.0576625	0.241046	0.72006
ENSG00000271580	24.6297	-0.004478	0.0685583	0.619617	NA
ENSG00000133059	1533.44	0.0168197	0.0540701	0.619914	0.909583
ENSG00000213041	21.9632	0.00444179	0.0684226	0.657426	NA
ENSG00000133069	258.027	0.08401	0.137248	0.028239	0.30141
ENSG00000163545	709.925	0.78524	0.111103	7.86823e-14	4.71307e-11
ENSG00000162873	21.2192	-0.00393304	0.0685328	0.655897	NA
ENSG00000235363	10.3735	-0.00181843	0.0687291	0.757886	NA
ENSG00000226235	13.0771	0.00114958	0.0685244	0.883822	NA
ENSG00000186007	530.008	0.000841669	0.0623644	0.963885	0.995351
ENSG00000281406	315.863	-0.00592626	0.0619974	0.834941	0.967699
ENSG00000117266	676.061	-0.0099491	0.0587388	0.751125	0.947831
ENSG00000174514	68.2225	-0.0148437	0.0693172	0.347849	0.789223
ENSG00000206762	12.9201	0.00638091	0.0690476	0.353499	NA
ENSG00000158711	7000.8	0.0284938	0.0471658	0.434739	0.834376
ENSG00000236942	15.6358	-0.000909766	0.0684363	0.912079	NA
ENSG00000158715	2847.41	-0.0250166	0.0513034	0.476486	0.854675
ENSG00000069275	27820.2	0.00638427	0.0454161	0.842649	0.969101
ENSG00000201944	23.4042	-0.00687666	0.0687585	0.476877	NA
ENSG00000117280	970.78	-0.000879474	0.0564637	0.977528	0.99722
ENSG00000133065	4464.88	-0.00381216	0.0459159	0.887591	0.979868
ENSG00000162877	22.025	0.000611274	0.0682758	0.950849	NA
ENSG00000276600	159.254	0.0142845	0.0674574	0.492834	0.859293
[truncated: 19,711 more rows]

## Sheet: Supplemental Table 5
	ONTOLOGY	ID	Description	setSize	enrichmentScore	NES	pvalue	p.adjust	qvalue	rank	leading_edge	core_enrichment
GO:1901137	BP	GO:1901137	carbohydrate derivative biosynthetic process	560	-0.606365	-1.95553	4.69259e-15	6.29182e-11	5.8025e-11	3077	tags=42%, list=17%, signal=36%	ENSG00000198786/ENSG00000169020/ENSG00000221988/ENSG00000243678/ENSG00000156162/ENSG00000239900/ENSG00000173511/ENSG00000132356/ENSG00000196547/ENSG00000179104/ENSG00000135454/ENSG00000171302/ENSG00000070731/ENSG00000204217/ENSG00000198695/ENSG00000228474/ENSG00000176920/ENSG00000198856/ENSG00000161013/ENSG00000130958/ENSG00000139629/ENSG00000213614/ENSG00000185883/ENSG00000118600/ENSG00000212907…
GO:0007059	BP	GO:0007059	chromosome segregation	382	-0.591984	-1.85046	1.37258e-09	9.20178e-06	8.48616e-06	3015	tags=32%, list=17%, signal=27%	ENSG00000140854/ENSG00000163322/ENSG00000154839/ENSG00000089053/ENSG00000075624/ENSG00000103769/ENSG00000153147/ENSG00000175643/ENSG00000121211/ENSG00000137822/ENSG00000072501/ENSG00000108424/ENSG00000137497/ENSG00000254505/ENSG00000123219/ENSG00000130724/ENSG00000151503/ENSG00000167513/ENSG00000119684/ENSG00000152253/ENSG00000137812/ENSG00000107816/ENSG00000126216/ENSG00000182504/ENSG00000004897…
GO:0046390	BP	GO:0046390	ribose phosphate biosynthetic process	205	-0.677026	-1.96838	4.65334e-09	2.07973e-05	1.91799e-05	3051	tags=42%, list=17%, signal=36%	ENSG00000185883/ENSG00000212907/ENSG00000159199/ENSG00000239672/ENSG00000147684/ENSG00000065518/ENSG00000102967/ENSG00000102125/ENSG00000140990/ENSG00000163655/ENSG00000184983/ENSG00000130377/ENSG00000198931/ENSG00000158864/ENSG00000156136/ENSG00000004779/ENSG00000061918/ENSG00000125375/ENSG00000131069/ENSG00000147224/ENSG00000198886/ENSG00000140284/ENSG00000162104/ENSG00000091140/ENSG00000117118…
GO:0000070	BP	GO:0000070	mitotic sister chromatid segregation	183	-0.688574	-1.98864	9.96935e-09	3.34172e-05	3.08184e-05	3015	tags=42%, list=17%, signal=35%	ENSG00000140854/ENSG00000163322/ENSG00000154839/ENSG00000089053/ENSG00000103769/ENSG00000153147/ENSG00000072501/ENSG00000108424/ENSG00000137497/ENSG00000254505/ENSG00000123219/ENSG00000130724/ENSG00000151503/ENSG00000167513/ENSG00000152253/ENSG00000137812/ENSG00000182504/ENSG00000113810/ENSG00000086065/ENSG00000071539/ENSG00000154473/ENSG00000118193/ENSG00000094880/ENSG00000094914/ENSG00000130177…
GO:1902850	BP	GO:1902850	microtubule cytoskeleton organization involved in mitosis	156	-0.71313	-2.02214	1.25951e-08	3.3775e-05	3.11483e-05	1047	tags=23%, list=6%, signal=22%	ENSG00000137807/ENSG00000115561/ENSG00000100242/ENSG00000138778/ENSG00000121957/ENSG00000151849/ENSG00000112742/ENSG00000132341/ENSG00000178999/ENSG00000117399/ENSG00000150093/ENSG00000237649/ENSG00000134690/ENSG00000090889/ENSG00000198901/ENSG00000166851/ENSG00000067560/ENSG00000175216/ENSG00000170312/ENSG00000134222/ENSG00000087586/ENSG00000149503/ENSG00000138160/ENSG00000134057/ENSG00000089685…
GO:0009260	BP	GO:0009260	ribonucleotide biosynthetic process	199	-0.663032	-1.91535	1.54663e-08	3.4562e-05	3.18741e-05	3051	tags=41%, list=17%, signal=35%	ENSG00000185883/ENSG00000212907/ENSG00000159199/ENSG00000239672/ENSG00000147684/ENSG00000065518/ENSG00000102967/ENSG00000102125/ENSG00000140990/ENSG00000163655/ENSG00000184983/ENSG00000130377/ENSG00000198931/ENSG00000158864/ENSG00000156136/ENSG00000004779/ENSG00000061918/ENSG00000125375/ENSG00000131069/ENSG00000198886/ENSG00000140284/ENSG00000162104/ENSG00000091140/ENSG00000117118/ENSG00000131828…
GO:0098798	CC	GO:0098798	mitochondrial protein-containing complex	290	-0.615425	-1.86205	1.97998e-08	3.79252e-05	3.49757e-05	3855	tags=44%, list=22%, signal=35%	ENSG00000005059/ENSG00000138035/ENSG00000213619/ENSG00000175581/ENSG00000048544/ENSG00000116221/ENSG00000163541/ENSG00000109519/ENSG00000185608/ENSG00000108826/ENSG00000198763/ENSG00000023228/ENSG00000101365/ENSG00000167792/ENSG00000265354/ENSG00000233954/ENSG00000198786/ENSG00000169020/ENSG00000122085/ENSG00000105197/ENSG00000116898/ENSG00000131143/ENSG00000198695/ENSG00000205981/ENSG00000144029…
GO:0098813	BP	GO:0098813	nuclear chromosome segregation	281	-0.62155	-1.87605	2.41803e-08	4.05262e-05	3.73745e-05	3015	tags=36%, list=17%, signal=30%	ENSG00000140854/ENSG00000163322/ENSG00000154839/ENSG00000089053/ENSG00000075624/ENSG00000103769/ENSG00000153147/ENSG00000175643/ENSG00000121211/ENSG00000072501/ENSG00000108424/ENSG00000137497/ENSG00000254505/ENSG00000123219/ENSG00000130724/ENSG00000151503/ENSG00000167513/ENSG00000119684/ENSG00000152253/ENSG00000137812/ENSG00000182504/ENSG00000004897/ENSG00000113810/ENSG00000086065/ENSG00000071539…
GO:0051301	BP	GO:0051301	cell division	570	-0.524736	-1.694	2.74744e-08	4.09307e-05	3.77475e-05	2044	tags=23%, list=11%, signal=21%	ENSG00000105245/ENSG00000183856/ENSG00000149273/ENSG00000128989/ENSG00000172461/ENSG00000118193/ENSG00000094880/ENSG00000120253/ENSG00000104147/ENSG00000130177/ENSG00000108106/ENSG00000152240/ENSG00000110200/ENSG00000072864/ENSG00000021574/ENSG00000114346/ENSG00000186871/ENSG00000101447/ENSG00000146425/ENSG00000166483/ENSG00000108262/ENSG00000133026/ENSG00000204628/ENSG00000105329/ENSG00000112029…
GO:0009152	BP	GO:0009152	purine ribonucleotide biosynthetic process	185	-0.674035	-1.95044	4.00007e-08	4.93521e-05	4.5514e-05	3646	tags=49%, list=20%, signal=40%	ENSG00000159131/ENSG00000106617/ENSG00000147853/ENSG00000198763/ENSG00000023228/ENSG00000167792/ENSG00000198682/ENSG00000198786/ENSG00000169020/ENSG00000221988/ENSG00000243678/ENSG00000239900/ENSG00000198695/ENSG00000185883/ENSG00000212907/ENSG00000159199/ENSG00000239672/ENSG00000147684/ENSG00000065518/ENSG00000102125/ENSG00000140990/ENSG00000163655/ENSG00000184983/ENSG00000130377/ENSG00000198931…
GO:0000793	CC	GO:0000793	condensed chromosome	249	-0.636184	-1.89057	4.09778e-08	4.93521e-05	4.5514e-05	3355	tags=39%, list=19%, signal=32%	ENSG00000204843/ENSG00000173473/ENSG00000166451/ENSG00000182628/ENSG00000069248/ENSG00000076242/ENSG00000149554/ENSG00000102384/ENSG00000108055/ENSG00000129810/ENSG00000168385/ENSG00000154839/ENSG00000075624/ENSG00000172167/ENSG00000153147/ENSG00000111581/ENSG00000072501/ENSG00000254505/ENSG00000123219/ENSG00000165169/ENSG00000163781/ENSG00000130724/ENSG00000151503/ENSG00000167513/ENSG00000119684…
GO:0045296	MF	GO:0045296	cadherin binding	312	-0.59514	-1.81677	4.78503e-08	4.93521e-05	4.5514e-05	2381	tags=29%, list=13%, signal=25%	ENSG00000086065/ENSG00000166913/ENSG00000089327/ENSG00000105355/ENSG00000163191/ENSG00000146648/ENSG00000085832/ENSG00000113643/ENSG00000089009/ENSG00000134333/ENSG00000275714/ENSG00000065548/ENSG00000136068/ENSG00000158195/ENSG00000198242/ENSG00000067225/ENSG00000139880/ENSG00000100591/ENSG00000057294/ENSG00000117519/ENSG00000174748/ENSG00000275379/ENSG00000138069/ENSG00000182718/ENSG00000213719…
GO:0055086	BP	GO:0055086	nucleobase-containing small molecule metabolic process	546	-0.524179	-1.68509	4.77016e-08	4.93521e-05	4.5514e-05	2973	tags=31%, list=17%, signal=27%	ENSG00000172269/ENSG00000167965/ENSG00000159199/ENSG00000239672/ENSG00000147684/ENSG00000065518/ENSG00000176890/ENSG00000102967/ENSG00000102125/ENSG00000167107/ENSG00000140990/ENSG00000166855/ENSG00000000419/ENSG00000130313/ENSG00000163655/ENSG00000184983/ENSG00000162694/ENSG00000130377/ENSG00000198931/ENSG00000197586/ENSG00000158864/ENSG00000156136/ENSG00000004779/ENSG00000154328/ENSG00000142156…
GO:0009117	BP	GO:0009117	nucleotide metabolic process	487	-0.534663	-1.71362	6.17696e-08	5.91576e-05	5.45569e-05	2966	tags=32%, list=17%, signal=27%	ENSG00000167965/ENSG00000159199/ENSG00000239672/ENSG00000147684/ENSG00000065518/ENSG00000176890/ENSG00000102967/ENSG00000102125/ENSG00000167107/ENSG00000140990/ENSG00000166855/ENSG00000130313/ENSG00000163655/ENSG00000184983/ENSG00000130377/ENSG00000198931/ENSG00000158864/ENSG00000156136/ENSG00000004779/ENSG00000154328/ENSG00000142156/ENSG00000061918/ENSG00000138430/ENSG00000125375/ENSG00000131069…
GO:0007052	BP	GO:0007052	mitotic spindle organization	127	-0.732016	-2.01659	7.5685e-08	6.76523e-05	6.2391e-05	1047	tags=24%, list=6%, signal=23%	ENSG00000137807/ENSG00000115561/ENSG00000100242/ENSG00000138778/ENSG00000121957/ENSG00000151849/ENSG00000112742/ENSG00000132341/ENSG00000178999/ENSG00000117399/ENSG00000237649/ENSG00000134690/ENSG00000090889/ENSG00000198901/ENSG00000166851/ENSG00000067560/ENSG00000175216/ENSG00000134222/ENSG00000087586/ENSG00000149503/ENSG00000138160/ENSG00000134057/ENSG00000089685/ENSG00000136122/ENSG00000088325…
GO:1904813	CC	GO:1904813	ficolin-1-rich granule lumen	111	-0.73282	-1.9932	1.06577e-07	8.14408e-05	7.51072e-05	1838	tags=37%, list=10%, signal=33%	ENSG00000134996/ENSG00000014216/ENSG00000146425/ENSG00000079739/ENSG00000103811/ENSG00000140319/ENSG00000196419/ENSG00000156261/ENSG00000171314/ENSG00000173801/ENSG00000169299/ENSG00000103196/ENSG00000158825/ENSG00000104763/ENSG00000135677/ENSG00000148218/ENSG00000117984/ENSG00000103187/ENSG00000123131/ENSG00000149925/ENSG00000101160/ENSG00000240972/ENSG00000105220/ENSG00000023697/ENSG00000171236…
GO:0000819	BP	GO:0000819	sister chromatid segregation	222	-0.644225	-1.88498	1.2108e-07	8.14408e-05	7.51072e-05	3015	tags=38%, list=17%, signal=32%	ENSG00000140854/ENSG00000163322/ENSG00000154839/ENSG00000089053/ENSG00000075624/ENSG00000103769/ENSG00000153147/ENSG00000175643/ENSG00000072501/ENSG00000108424/ENSG00000137497/ENSG00000254505/ENSG00000123219/ENSG00000130724/ENSG00000151503/ENSG00000167513/ENSG00000152253/ENSG00000137812/ENSG00000182504/ENSG00000004897/ENSG00000113810/ENSG00000086065/ENSG00000071539/ENSG00000108604/ENSG00000154473…
GO:0072522	BP	GO:0072522	purine-containing compound biosynthetic process	220	-0.642728	-1.87539	1.39703e-07	8.14408e-05	7.51072e-05	3565	tags=45%, list=20%, signal=36%	ENSG00000147853/ENSG00000198763/ENSG00000176974/ENSG00000023228/ENSG00000161542/ENSG00000167792/ENSG00000198682/ENSG00000198786/ENSG00000169020/ENSG00000221988/ENSG00000243678/ENSG00000239900/ENSG00000198695/ENSG00000112874/ENSG00000185883/ENSG00000212907/ENSG00000159199/ENSG00000239672/ENSG00000147684/ENSG00000065518/ENSG00000102125/ENSG00000140990/ENSG00000163655/ENSG00000184983/ENSG00000130377…
GO:1901293	BP	GO:1901293	nucleoside phosphate biosynthetic process	250	-0.624659	-1.85999	1.28245e-07	8.14408e-05	7.51072e-05	3670	tags=44%, list=21%, signal=35%	ENSG00000128951/ENSG00000159131/ENSG00000106617/ENSG00000147853/ENSG00000198763/ENSG00000176974/ENSG00000023228/ENSG00000161542/ENSG00000167792/ENSG00000198682/ENSG00000198786/ENSG00000169020/ENSG00000221988/ENSG00000243678/ENSG00000239900/ENSG00000198695/ENSG00000112874/ENSG00000185883/ENSG00000212907/ENSG00000159199/ENSG00000239672/ENSG00000147684/ENSG00000065518/ENSG00000176890/ENSG00000102967…
GO:0005840	CC	GO:0005840	ribosome	225	-0.631709	-1.85659	1.24753e-07	8.14408e-05	7.51072e-05	3840	tags=44%, list=22%, signal=35%	ENSG00000138035/ENSG00000149806/ENSG00000071082/ENSG00000175581/ENSG00000048544/ENSG00000168724/ENSG00000171490/ENSG00000116221/ENSG00000167658/ENSG00000185608/ENSG00000125691/ENSG00000108826/ENSG00000170889/ENSG00000137818/ENSG00000122085/ENSG00000144713/ENSG00000116251/ENSG00000037241/ENSG00000116898/ENSG00000142534/ENSG00000144029/ENSG00000100823/ENSG00000055950/ENSG00000144895/ENSG00000125445…
GO:0072521	BP	GO:0072521	purine-containing compound metabolic process	447	-0.544146	-1.72025	1.00953e-07	8.14408e-05	7.51072e-05	2966	tags=33%, list=17%, signal=28%	ENSG00000167965/ENSG00000159199/ENSG00000239672/ENSG00000147684/ENSG00000065518/ENSG00000102125/ENSG00000167107/ENSG00000140990/ENSG00000166855/ENSG00000130313/ENSG00000163655/ENSG00000184983/ENSG00000130377/ENSG00000198931/ENSG00000158864/ENSG00000156136/ENSG00000004779/ENSG00000142156/ENSG00000061918/ENSG00000138430/ENSG00000125375/ENSG00000131069/ENSG00000171105/ENSG00000147224/ENSG00000158122…
GO:0006753	BP	GO:0006753	nucleoside phosphate metabolic process	495	-0.535587	-1.7172	1.39218e-07	8.14408e-05	7.51072e-05	2966	tags=32%, list=17%, signal=27%	ENSG00000167965/ENSG00000159199/ENSG00000239672/ENSG00000147684/ENSG00000065518/ENSG00000176890/ENSG00000102967/ENSG00000102125/ENSG00000167107/ENSG00000140990/ENSG00000166855/ENSG00000130313/ENSG00000163655/ENSG00000184983/ENSG00000130377/ENSG00000198931/ENSG00000197586/ENSG00000158864/ENSG00000156136/ENSG00000004779/ENSG00000154328/ENSG00000142156/ENSG00000061918/ENSG00000138430/ENSG00000125375…
GO:0070161	CC	GO:0070161	anchoring junction	756	-0.481782	-1.59917	1.38188e-07	8.14408e-05	7.51072e-05	2534	tags=26%, list=14%, signal=23%	ENSG00000128849/ENSG00000081138/ENSG00000143537/ENSG00000124145/ENSG00000166250/ENSG00000125848/ENSG00000128245/ENSG00000163466/ENSG00000204381/ENSG00000023839/ENSG00000143363/ENSG00000110880/ENSG00000166913/ENSG00000162407/ENSG00000163191/ENSG00000083307/ENSG00000198755/ENSG00000198910/ENSG00000115268/ENSG00000187446/ENSG00000165215/ENSG00000146648/ENSG00000168807/ENSG00000129116/ENSG00000197756…
GO:0001216	MF	GO:0001216	DNA-binding transcription activator activity	337	0.781206	2.03762	1.84985e-07	9.74219e-05	8.98454e-05	934	tags=14%, list=5%, signal=13%	ENSG00000162772/ENSG00000077150/ENSG00000136826/ENSG00000155090/ENSG00000134317/ENSG00000144655/ENSG00000175197/ENSG00000118263/ENSG00000067082/ENSG00000142611/ENSG00000110925/ENSG00000109320/ENSG00000123358/ENSG00000172216/ENSG00000185022/ENSG00000115844/ENSG00000124766/ENSG00000180535/ENSG00000125740/ENSG00000197362/ENSG00000166188/ENSG00000171223/ENSG00000153879/ENSG00000164463/ENSG00000116809…
GO:0001228	MF	GO:0001228	DNA-binding transcription activator activity, RNA polymerase II-specific	332	0.783318	2.03609	1.88915e-07	9.74219e-05	8.98454e-05	934	tags=14%, list=5%, signal=13%	ENSG00000162772/ENSG00000077150/ENSG00000136826/ENSG00000155090/ENSG00000134317/ENSG00000144655/ENSG00000175197/ENSG00000118263/ENSG00000067082/ENSG00000142611/ENSG00000110925/ENSG00000109320/ENSG00000123358/ENSG00000172216/ENSG00000185022/ENSG00000115844/ENSG00000124766/ENSG00000180535/ENSG00000125740/ENSG00000197362/ENSG00000166188/ENSG00000171223/ENSG00000153879/ENSG00000164463/ENSG00000116809…
GO:0019693	BP	GO:0019693	ribose phosphate metabolic process	392	-0.557004	-1.7423	1.74955e-07	9.74219e-05	8.98454e-05	2966	tags=33%, list=17%, signal=28%	ENSG00000167965/ENSG00000159199/ENSG00000239672/ENSG00000147684/ENSG00000065518/ENSG00000102967/ENSG00000102125/ENSG00000167107/ENSG00000140990/ENSG00000166855/ENSG00000163655/ENSG00000184983/ENSG00000130377/ENSG00000198931/ENSG00000158864/ENSG00000156136/ENSG00000004779/ENSG00000142156/ENSG00000061918/ENSG00000138430/ENSG00000125375/ENSG00000131069/ENSG00000171105/ENSG00000147224/ENSG00000158122…
GO:0009165	BP	GO:0009165	nucleotide biosynthetic process	248	-0.624116	-1.8552	2.92584e-07	0.000143968	0.000132771	3670	tags=44%, list=21%, signal=35%	ENSG00000128951/ENSG00000159131/ENSG00000106617/ENSG00000147853/ENSG00000198763/ENSG00000176974/ENSG00000023228/ENSG00000161542/ENSG00000167792/ENSG00000198682/ENSG00000198786/ENSG00000169020/ENSG00000221988/ENSG00000243678/ENSG00000239900/ENSG00000198695/ENSG00000112874/ENSG00000185883/ENSG00000212907/ENSG00000159199/ENSG00000239672/ENSG00000147684/ENSG00000065518/ENSG00000176890/ENSG00000102967…
GO:0050839	MF	GO:0050839	cell adhesion molecule binding	474	-0.533739	-1.70298	3.00648e-07	0.000143968	0.000132771	2381	tags=28%, list=13%, signal=25%	ENSG00000086065/ENSG00000146938/ENSG00000166913/ENSG00000162407/ENSG00000089327/ENSG00000105355/ENSG00000163191/ENSG00000146648/ENSG00000085832/ENSG00000129116/ENSG00000113643/ENSG00000177707/ENSG00000089009/ENSG00000134333/ENSG00000275714/ENSG00000065548/ENSG00000136068/ENSG00000158195/ENSG00000198242/ENSG00000067225/ENSG00000176834/ENSG00000169760/ENSG00000139880/ENSG00000100591/ENSG00000057294…
GO:0006163	BP	GO:0006163	purine nucleotide metabolic process	432	-0.545881	-1.72553	3.2361e-07	0.00014785	0.000136352	2966	tags=33%, list=17%, signal=28%	ENSG00000167965/ENSG00000159199/ENSG00000239672/ENSG00000147684/ENSG00000065518/ENSG00000102125/ENSG00000167107/ENSG00000140990/ENSG00000166855/ENSG00000130313/ENSG00000163655/ENSG00000184983/ENSG00000130377/ENSG00000198931/ENSG00000158864/ENSG00000156136/ENSG00000004779/ENSG00000142156/ENSG00000061918/ENSG00000138430/ENSG00000125375/ENSG00000131069/ENSG00000171105/ENSG00000147224/ENSG00000158122…
GO:0051276	BP	GO:0051276	chromosome organization	569	-0.513823	-1.66054	3.3081e-07	0.00014785	0.000136352	3016	tags=27%, list=17%, signal=23%	ENSG00000100823/ENSG00000140854/ENSG00000163468/ENSG00000163322/ENSG00000092199/ENSG00000154839/ENSG00000137309/ENSG00000089053/ENSG00000075624/ENSG00000106028/ENSG00000168036/ENSG00000103769/ENSG00000153147/ENSG00000175643/ENSG00000121211/ENSG00000111581/ENSG00000072501/ENSG00000108424/ENSG00000137497/ENSG00000254505/ENSG00000182117/ENSG00000123219/ENSG00000035928/ENSG00000163781/ENSG00000130724…
GO:0101002	CC	GO:0101002	ficolin-1-rich granule	149	-0.694677	-1.95562	4.77868e-07	0.000206686	0.000190612	1838	tags=43%, list=10%, signal=39%	ENSG00000131504/ENSG00000160255/ENSG00000185883/ENSG00000162704/ENSG00000111144/ENSG00000116815/ENSG00000163531/ENSG00000108424/ENSG00000035403/ENSG00000167996/ENSG00000121410/ENSG00000129083/ENSG00000198053/ENSG00000169919/ENSG00000143621/ENSG00000059804/ENSG00000067225/ENSG00000134996/ENSG00000014216/ENSG00000146425/ENSG00000079739/ENSG00000103811/ENSG00000140319/ENSG00000196419/ENSG00000156261…
GO:0006164	BP	GO:0006164	purine nucleotide biosynthetic process	214	-0.645585	-1.88944	5.09701e-07	0.000213565	0.000196956	3565	tags=46%, list=20%, signal=37%	ENSG00000159131/ENSG00000106617/ENSG00000147853/ENSG00000198763/ENSG00000023228/ENSG00000161542/ENSG00000167792/ENSG00000198682/ENSG00000198786/ENSG00000169020/ENSG00000221988/ENSG00000243678/ENSG00000239900/ENSG00000198695/ENSG00000112874/ENSG00000185883/ENSG00000212907/ENSG00000159199/ENSG00000239672/ENSG00000147684/ENSG00000065518/ENSG00000102125/ENSG00000140990/ENSG00000163655/ENSG00000184983…
GO:0044391	CC	GO:0044391	ribosomal subunit	184	-0.65554	-1.89669	5.80428e-07	0.00023583	0.000217489	3814	tags=48%, list=21%, signal=38%	ENSG00000149806/ENSG00000071082/ENSG00000175581/ENSG00000048544/ENSG00000171490/ENSG00000116221/ENSG00000185608/ENSG00000125691/ENSG00000108826/ENSG00000170889/ENSG00000137818/ENSG00000122085/ENSG00000144713/ENSG00000116251/ENSG00000037241/ENSG00000116898/ENSG00000142534/ENSG00000144029/ENSG00000055950/ENSG00000144895/ENSG00000125445/ENSG00000158042/ENSG00000100316/ENSG00000186468/ENSG00000118181…
GO:1903047	BP	GO:1903047	mitotic cell cycle process	678	-0.477488	-1.56529	8.34786e-07	0.0003292	0.000303599	2029	tags=22%, list=11%, signal=20%	ENSG00000153044/ENSG00000183856/ENSG00000128989/ENSG00000118193/ENSG00000094880/ENSG00000095002/ENSG00000136235/ENSG00000156509/ENSG00000176208/ENSG00000094914/ENSG00000130177/ENSG00000108106/ENSG00000112118/ENSG00000138376/ENSG00000110200/ENSG00000072864/ENSG00000051180/ENSG00000021574/ENSG00000114346/ENSG00000146425/ENSG00000166483/ENSG00000133026/ENSG00000115966/ENSG00000112029/ENSG00000167325…
GO:0042470	CC	GO:0042470	melanosome	100	-0.737765	-1.9774	1.15488e-06	0.000430129	0.000396678	2435	tags=46%, list=14%, signal=40%	ENSG00000089248/ENSG00000135404/ENSG00000100099/ENSG00000075785/ENSG00000166913/ENSG00000104388/ENSG00000137563/ENSG00000162736/ENSG00000127022/ENSG00000136235/ENSG00000104044/ENSG00000138069/ENSG00000182718/ENSG00000163902/ENSG00000111540/ENSG00000185624/ENSG00000105281/ENSG00000166794/ENSG00000165240/ENSG00000157227/ENSG00000115484/ENSG00000008282/ENSG00000117984/ENSG00000108953/ENSG00000185896…
GO:0048770	CC	GO:0048770	pigment granule	100	-0.737765	-1.9774	1.15488e-06	0.000430129	0.000396678	2435	tags=46%, list=14%, signal=40%	ENSG00000089248/ENSG00000135404/ENSG00000100099/ENSG00000075785/ENSG00000166913/ENSG00000104388/ENSG00000137563/ENSG00000162736/ENSG00000127022/ENSG00000136235/ENSG00000104044/ENSG00000138069/ENSG00000182718/ENSG00000163902/ENSG00000111540/ENSG00000185624/ENSG00000105281/ENSG00000166794/ENSG00000165240/ENSG00000157227/ENSG00000115484/ENSG00000008282/ENSG00000117984/ENSG00000108953/ENSG00000185896…
GO:0009100	BP	GO:0009100	glycoprotein metabolic process	299	-0.585747	-1.77374	1.31385e-06	0.000476109	0.000439082	3299	tags=43%, list=19%, signal=35%	ENSG00000173511/ENSG00000196547/ENSG00000179104/ENSG00000102312/ENSG00000171302/ENSG00000070731/ENSG00000204217/ENSG00000228474/ENSG00000176920/ENSG00000198856/ENSG00000161013/ENSG00000130958/ENSG00000139629/ENSG00000213614/ENSG00000118600/ENSG00000172269/ENSG00000168036/ENSG00000167280/ENSG00000156966/ENSG00000176928/ENSG00000116406/ENSG00000000419/ENSG00000162694/ENSG00000149541/ENSG00000111846…
GO:0090407	BP	GO:0090407	organophosphate biosynthetic process	507	-0.505797	-1.61916	1.804e-06	0.000636527	0.000587025	2956	tags=31%, list=17%, signal=27%	ENSG00000159199/ENSG00000239672/ENSG00000147684/ENSG00000065518/ENSG00000176890/ENSG00000102967/ENSG00000102125/ENSG00000197858/ENSG00000140990/ENSG00000000419/ENSG00000163655/ENSG00000151689/ENSG00000156471/ENSG00000184983/ENSG00000130377/ENSG00000151665/ENSG00000169692/ENSG00000198931/ENSG00000276293/ENSG00000158864/ENSG00000135845/ENSG00000156136/ENSG00000004779/ENSG00000111897/ENSG00000100344…
GO:0005198	MF	GO:0005198	structural molecule activity	552	-0.502013	-1.60883	2.03143e-06	0.000698394	0.00064408	3035	tags=35%, list=17%, signal=30%	ENSG00000137801/ENSG00000162704/ENSG00000078114/ENSG00000055950/ENSG00000137309/ENSG00000075624/ENSG00000275713/ENSG00000180573/ENSG00000179403/ENSG00000136811/ENSG00000061656/ENSG00000137822/ENSG00000111581/ENSG00000125445/ENSG00000137497/ENSG00000137876/ENSG00000127337/ENSG00000158042/ENSG00000035403/ENSG00000163520/ENSG00000182871/ENSG00000100316/ENSG00000167553/ENSG00000188157/ENSG00000278637…
GO:0048285	BP	GO:0048285	organelle fission	412	-0.524469	-1.65535	2.14956e-06	0.000720531	0.000664495	2900	tags=33%, list=16%, signal=28%	ENSG00000140854/ENSG00000163322/ENSG00000154839/ENSG00000089053/ENSG00000172167/ENSG00000103769/ENSG00000153147/ENSG00000167244/ENSG00000121211/ENSG00000072501/ENSG00000108424/ENSG00000137497/ENSG00000254505/ENSG00000123219/ENSG00000111247/ENSG00000006695/ENSG00000130724/ENSG00000151503/ENSG00000178966/ENSG00000215021/ENSG00000132749/ENSG00000167513/ENSG00000119684/ENSG00000152253/ENSG00000138182…
GO:0050000	BP	GO:0050000	chromosome localization	113	-0.706062	-1.91473	2.21918e-06	0.000725726	0.000669286	3015	tags=42%, list=17%, signal=36%	ENSG00000140854/ENSG00000163322/ENSG00000154839/ENSG00000103769/ENSG00000108424/ENSG00000137497/ENSG00000254505/ENSG00000130724/ENSG00000167513/ENSG00000152253/ENSG00000137812/ENSG00000086065/ENSG00000154473/ENSG00000118193/ENSG00000094880/ENSG00000072864/ENSG00000114346/ENSG00000101447/ENSG00000079616/ENSG00000085415/ENSG00000149636/ENSG00000122952/ENSG00000115561/ENSG00000121621/ENSG00000138778…
GO:0007051	BP	GO:0007051	spindle organization	189	-0.634362	-1.83917	2.60671e-06	0.000832162	0.000767445	1047	tags=20%, list=6%, signal=19%	ENSG00000137807/ENSG00000115561/ENSG00000100242/ENSG00000138778/ENSG00000166974/ENSG00000121957/ENSG00000151849/ENSG00000112742/ENSG00000128944/ENSG00000076382/ENSG00000132341/ENSG00000178999/ENSG00000117399/ENSG00000237649/ENSG00000066279/ENSG00000134690/ENSG00000090889/ENSG00000198901/ENSG00000166851/ENSG00000067560/ENSG00000175216/ENSG00000134222/ENSG00000087586/ENSG00000092820/ENSG00000149503…
GO:0003735	MF	GO:0003735	structural constituent of ribosome	154	-0.67544	-1.90987	2.74153e-06	0.000854846	0.000788365	3814	tags=49%, list=21%, signal=39%	ENSG00000149806/ENSG00000071082/ENSG00000116221/ENSG00000125691/ENSG00000108826/ENSG00000170889/ENSG00000137818/ENSG00000144713/ENSG00000116251/ENSG00000037241/ENSG00000116898/ENSG00000142534/ENSG00000144029/ENSG00000055950/ENSG00000125445/ENSG00000137876/ENSG00000158042/ENSG00000100316/ENSG00000186468/ENSG00000118181/ENSG00000143947/ENSG00000061794/ENSG00000172172/ENSG00000106591/ENSG00000102738…
GO:0140014	BP	GO:0140014	mitotic nuclear division	260	-0.58622	-1.75787	3.36091e-06	0.00102416	0.000944512	1993	tags=28%, list=11%, signal=25%	ENSG00000118193/ENSG00000094880/ENSG00000156509/ENSG00000094914/ENSG00000130177/ENSG00000108106/ENSG00000110200/ENSG00000072864/ENSG00000021574/ENSG00000112029/ENSG00000183765/ENSG00000079616/ENSG00000168476/ENSG00000114391/ENSG00000085415/ENSG00000105568/ENSG00000148773/ENSG00000122952/ENSG00000121152/ENSG00000169515/ENSG00000137807/ENSG00000165476/ENSG00000116670/ENSG00000115561/ENSG00000121621…
GO:0098687	CC	GO:0098687	chromosomal region	374	-0.532884	-1.66005	4.31823e-06	0.00128664	0.00118658	2831	tags=30%, list=16%, signal=26%	ENSG00000111581/ENSG00000072501/ENSG00000254505/ENSG00000123219/ENSG00000111247/ENSG00000165169/ENSG00000130724/ENSG00000151503/ENSG00000167513/ENSG00000152253/ENSG00000278637/ENSG00000107960/ENSG00000278463/ENSG00000109445/ENSG00000137812/ENSG00000125354/ENSG00000113810/ENSG00000086065/ENSG00000047315/ENSG00000108604/ENSG00000203760/ENSG00000135336/ENSG00000152455/ENSG00000136504/ENSG00000154473…
GO:0019866	CC	GO:0019866	organelle inner membrane	496	-0.501497	-1.60833	4.49445e-06	0.00131003	0.00120815	3181	tags=32%, list=18%, signal=27%	ENSG00000116898/ENSG00000131143/ENSG00000198695/ENSG00000205981/ENSG00000144029/ENSG00000161904/ENSG00000050426/ENSG00000269743/ENSG00000161513/ENSG00000212907/ENSG00000162769/ENSG00000055950/ENSG00000159199/ENSG00000166881/ENSG00000147684/ENSG00000010256/ENSG00000065518/ENSG00000125648/ENSG00000176890/ENSG00000171766/ENSG00000174917/ENSG00000102967/ENSG00000102125/ENSG00000061656/ENSG00000140990…
GO:0022613	BP	GO:0022613	ribonucleoprotein complex biogenesis	454	-0.506579	-1.60411	6.85235e-06	0.00195482	0.00180279	3600	tags=26%, list=20%, signal=21%	ENSG00000001497/ENSG00000164167/ENSG00000089048/ENSG00000170889/ENSG00000134987/ENSG00000275464/ENSG00000092847/ENSG00000110107/ENSG00000117419/ENSG00000174231/ENSG00000111786/ENSG00000130826/ENSG00000122085/ENSG00000039123/ENSG00000115128/ENSG00000037241/ENSG00000108561/ENSG00000148688/ENSG00000100353/ENSG00000142534/ENSG00000118246/ENSG00000178982/ENSG00000198498/ENSG00000144028/ENSG00000100129…
GO:0000779	CC	GO:0000779	condensed chromosome, centromeric region	173	-0.634201	-1.81461	7.87052e-06	0.00215363	0.00198614	3355	tags=42%, list=19%, signal=34%	ENSG00000204843/ENSG00000173473/ENSG00000166451/ENSG00000182628/ENSG00000069248/ENSG00000102384/ENSG00000129810/ENSG00000168385/ENSG00000154839/ENSG00000075624/ENSG00000172167/ENSG00000111581/ENSG00000072501/ENSG00000254505/ENSG00000123219/ENSG00000165169/ENSG00000130724/ENSG00000151503/ENSG00000167513/ENSG00000152253/ENSG00000137812/ENSG00000125354/ENSG00000086065/ENSG00000108604/ENSG00000203760…
GO:0005819	CC	GO:0005819	spindle	400	-0.518764	-1.62628	7.71327e-06	0.00215363	0.00198614	2006	tags=20%, list=11%, signal=18%	ENSG00000149273/ENSG00000118193/ENSG00000094914/ENSG00000130177/ENSG00000152240/ENSG00000100304/ENSG00000072864/ENSG00000021574/ENSG00000114346/ENSG00000163808/ENSG00000101447/ENSG00000146425/ENSG00000169607/ENSG00000108262/ENSG00000017797/ENSG00000184731/ENSG00000112029/ENSG00000166582/ENSG00000079616/ENSG00000143543/ENSG00000143933/ENSG00000149636/ENSG00000134152/ENSG00000122565/ENSG00000181163…
GO:0000280	BP	GO:0000280	nuclear division	370	-0.530039	-1.65225	9.05768e-06	0.00238128	0.00219609	1993	tags=25%, list=11%, signal=22%	ENSG00000118193/ENSG00000094880/ENSG00000170315/ENSG00000156509/ENSG00000094914/ENSG00000130177/ENSG00000108106/ENSG00000114251/ENSG00000110200/ENSG00000072864/ENSG00000051180/ENSG00000021574/ENSG00000112029/ENSG00000183765/ENSG00000079616/ENSG00000168476/ENSG00000114391/ENSG00000085415/ENSG00000105568/ENSG00000148773/ENSG00000122952/ENSG00000154920/ENSG00000121152/ENSG00000169515/ENSG00000123975…
GO:0005509	MF	GO:0005509	calcium ion binding	439	-0.511072	-1.6202	9.03487e-06	0.00238128	0.00219609	2674	tags=29%, list=15%, signal=25%	ENSG00000204956/ENSG00000188157/ENSG00000108588/ENSG00000004779/ENSG00000123739/ENSG00000132561/ENSG00000010404/ENSG00000243232/ENSG00000081138/ENSG00000169851/ENSG00000075275/ENSG00000198668/ENSG00000196562/ENSG00000153395/ENSG00000143631/ENSG00000167323/ENSG00000165304/ENSG00000273136/ENSG00000162517/ENSG00000189334/ENSG00000163191/ENSG00000011347/ENSG00000221823/ENSG00000187446/ENSG00000085832…
GO:0009150	BP	GO:0009150	purine ribonucleotide metabolic process	363	-0.534807	-1.65436	9.6921e-06	0.00249907	0.00230472	3384	tags=37%, list=19%, signal=31%	ENSG00000198786/ENSG00000169020/ENSG00000067057/ENSG00000221988/ENSG00000243678/ENSG00000239900/ENSG00000132356/ENSG00000075711/ENSG00000119139/ENSG00000198695/ENSG00000130770/ENSG00000147044/ENSG00000119689/ENSG00000185883/ENSG00000212907/ENSG00000167965/ENSG00000159199/ENSG00000239672/ENSG00000147684/ENSG00000065518/ENSG00000102125/ENSG00000167107/ENSG00000140990/ENSG00000166855/ENSG00000163655…
GO:0099503	CC	GO:0099503	secretory vesicle	714	-0.460824	-1.52171	1.04932e-05	0.00265459	0.00244814	1967	tags=35%, list=11%, signal=32%	ENSG00000108219/ENSG00000131504/ENSG00000160255/ENSG00000146409/ENSG00000168385/ENSG00000213614/ENSG00000185883/ENSG00000100243/ENSG00000184056/ENSG00000137801/ENSG00000116473/ENSG00000162704/ENSG00000197461/ENSG00000111144/ENSG00000122359/ENSG00000185236/ENSG00000138279/ENSG00000102393/ENSG00000105404/ENSG00000116815/ENSG00000170515/ENSG00000167461/ENSG00000167244/ENSG00000186792/ENSG00000138246…
GO:0022626	CC	GO:0022626	cytosolic ribosome	113	-0.688766	-1.86783	1.07427e-05	0.00266737	0.00245993	2835	tags=46%, list=16%, signal=39%	ENSG00000144895/ENSG00000100316/ENSG00000186468/ENSG00000118181/ENSG00000143947/ENSG00000164163/ENSG00000198755/ENSG00000115268/ENSG00000197756/ENSG00000231500/ENSG00000134419/ENSG00000089009/ENSG00000198242/ENSG00000174444/ENSG00000149273/ENSG00000198918/ENSG00000105640/ENSG00000008988/ENSG00000174748/ENSG00000108298/ENSG00000122406/ENSG00000197958/ENSG00000145912/ENSG00000204628/ENSG00000138326…
GO:0030141	CC	GO:0030141	secretory granule	596	-0.475229	-1.5437	1.1795e-05	0.00287541	0.00265179	1967	tags=38%, list=11%, signal=35%	ENSG00000108219/ENSG00000131504/ENSG00000160255/ENSG00000146409/ENSG00000213614/ENSG00000185883/ENSG00000100243/ENSG00000184056/ENSG00000137801/ENSG00000116473/ENSG00000162704/ENSG00000197461/ENSG00000111144/ENSG00000122359/ENSG00000138279/ENSG00000102393/ENSG00000116815/ENSG00000170515/ENSG00000167244/ENSG00000186792/ENSG00000138246/ENSG00000163354/ENSG00000163531/ENSG00000148248/ENSG00000108424…
GO:0051656	BP	GO:0051656	establishment of organelle localization	403	-0.516701	-1.62329	1.37378e-05	0.00328922	0.00303342	3006	tags=27%, list=17%, signal=23%	ENSG00000163322/ENSG00000185236/ENSG00000154839/ENSG00000129354/ENSG00000126756/ENSG00000168036/ENSG00000103769/ENSG00000108424/ENSG00000137497/ENSG00000254505/ENSG00000007255/ENSG00000114354/ENSG00000130724/ENSG00000165959/ENSG00000118242/ENSG00000143553/ENSG00000167513/ENSG00000152253/ENSG00000137812/ENSG00000124145/ENSG00000176619/ENSG00000075785/ENSG00000086065/ENSG00000086598/ENSG00000164163…
GO:0006954	BP	GO:0006954	inflammatory response	494	0.687738	1.86015	1.48231e-05	0.00348681	0.00321564	523	tags=11%, list=3%, signal=11%	ENSG00000104856/ENSG00000023445/ENSG00000077150/ENSG00000136826/ENSG00000010810/ENSG00000169896/ENSG00000126368/ENSG00000265972/ENSG00000134339/ENSG00000083799/ENSG00000134070/ENSG00000105499/ENSG00000100292/ENSG00000232810/ENSG00000132510/ENSG00000271503/ENSG00000125730/ENSG00000169429/ENSG00000118503/ENSG00000173432/ENSG00000100906/ENSG00000081041/ENSG00000186642/ENSG00000109320/ENSG00000125845…
GO:0022904	BP	GO:0022904	respiratory electron transport chain	113	-0.684434	-1.85608	1.56353e-05	0.00355739	0.00328073	3562	tags=51%, list=20%, signal=41%	ENSG00000198763/ENSG00000023228/ENSG00000105379/ENSG00000167792/ENSG00000233954/ENSG00000198786/ENSG00000131143/ENSG00000198695/ENSG00000212907/ENSG00000147684/ENSG00000010256/ENSG00000065518/ENSG00000102125/ENSG00000140990/ENSG00000184983/ENSG00000198712/ENSG00000158864/ENSG00000164919/ENSG00000004779/ENSG00000042286/ENSG00000135940/ENSG00000127540/ENSG00000112695/ENSG00000198886/ENSG00000178741…
GO:0000775	CC	GO:0000775	chromosome, centromeric region	243	-0.581496	-1.72067	1.57187e-05	0.00355739	0.00328073	2993	tags=33%, list=17%, signal=28%	ENSG00000154839/ENSG00000075624/ENSG00000172167/ENSG00000153147/ENSG00000111581/ENSG00000072501/ENSG00000254505/ENSG00000123219/ENSG00000165169/ENSG00000130724/ENSG00000151503/ENSG00000167513/ENSG00000152253/ENSG00000278637/ENSG00000278463/ENSG00000109445/ENSG00000137812/ENSG00000125354/ENSG00000113810/ENSG00000086065/ENSG00000108604/ENSG00000203760/ENSG00000152455/ENSG00000136504/ENSG00000154473…
GO:0045177	CC	GO:0045177	apical part of cell	303	-0.553599	-1.6808	1.59191e-05	0.00355739	0.00328073	2096	tags=24%, list=12%, signal=22%	ENSG00000163406/ENSG00000168575/ENSG00000114770/ENSG00000116039/ENSG00000198648/ENSG00000081923/ENSG00000197635/ENSG00000074410/ENSG00000163803/ENSG00000135750/ENSG00000135047/ENSG00000103942/ENSG00000130303/ENSG00000162493/ENSG00000080031/ENSG00000110375/ENSG00000143153/ENSG00000080822/ENSG00000185920/ENSG00000088836/ENSG00000131389/ENSG00000147649/ENSG00000152661/ENSG00000103222/ENSG00000165240…
GO:0000776	CC	GO:0000776	kinetochore	162	-0.649091	-1.83728	1.76188e-05	0.00371903	0.0034298	3355	tags=41%, list=19%, signal=34%	ENSG00000204843/ENSG00000173473/ENSG00000166451/ENSG00000182628/ENSG00000069248/ENSG00000102384/ENSG00000129810/ENSG00000168385/ENSG00000154839/ENSG00000075624/ENSG00000172167/ENSG00000111581/ENSG00000072501/ENSG00000254505/ENSG00000123219/ENSG00000165169/ENSG00000130724/ENSG00000167513/ENSG00000152253/ENSG00000137812/ENSG00000125354/ENSG00000086065/ENSG00000108604/ENSG00000203760/ENSG00000154473…
GO:0009259	BP	GO:0009259	ribonucleotide metabolic process	380	-0.531899	-1.66055	1.73977e-05	0.00371903	0.0034298	3384	tags=37%, list=19%, signal=30%	ENSG00000198786/ENSG00000169020/ENSG00000067057/ENSG00000221988/ENSG00000243678/ENSG00000239900/ENSG00000132356/ENSG00000075711/ENSG00000119139/ENSG00000198695/ENSG00000130770/ENSG00000147044/ENSG00000119689/ENSG00000185883/ENSG00000212907/ENSG00000167965/ENSG00000159199/ENSG00000239672/ENSG00000147684/ENSG00000065518/ENSG00000102967/ENSG00000102125/ENSG00000167107/ENSG00000140990/ENSG00000166855…
GO:0030055	CC	GO:0030055	cell-substrate junction	394	-0.520321	-1.62726	1.7704e-05	0.00371903	0.0034298	2457	tags=31%, list=14%, signal=27%	ENSG00000125848/ENSG00000163466/ENSG00000204381/ENSG00000143363/ENSG00000110880/ENSG00000166913/ENSG00000198755/ENSG00000198910/ENSG00000115268/ENSG00000187446/ENSG00000146648/ENSG00000168807/ENSG00000129116/ENSG00000197756/ENSG00000231500/ENSG00000089009/ENSG00000136068/ENSG00000174444/ENSG00000053747/ENSG00000149273/ENSG00000076706/ENSG00000117519/ENSG00000162736/ENSG00000138448/ENSG00000108298…
GO:0036134	MF	GO:0036134	12-hydroxyheptadecatrienoic acid synthase activity	3	-0.99766	-1.48754	1.77519e-05	0.00371903	0.0034298	25	tags=67%, list=0%, signal=67%	ENSG00000148334/ENSG00000167600
GO:0009101	BP	GO:0009101	glycoprotein biosynthetic process	252	-0.578823	-1.7299	1.83459e-05	0.00378434	0.00349004	3299	tags=42%, list=19%, signal=34%	ENSG00000173511/ENSG00000196547/ENSG00000179104/ENSG00000171302/ENSG00000070731/ENSG00000204217/ENSG00000228474/ENSG00000176920/ENSG00000198856/ENSG00000161013/ENSG00000130958/ENSG00000139629/ENSG00000118600/ENSG00000172269/ENSG00000168036/ENSG00000156966/ENSG00000176928/ENSG00000116406/ENSG00000000419/ENSG00000162694/ENSG00000149541/ENSG00000111846/ENSG00000012232/ENSG00000170340/ENSG00000115275…
GO:0043202	CC	GO:0043202	lysosomal lumen	77	-0.759862	-1.97031	1.93563e-05	0.00393227	0.00362646	1288	tags=36%, list=7%, signal=34%	ENSG00000049860/ENSG00000013288/ENSG00000114378/ENSG00000173083/ENSG00000104763/ENSG00000135677/ENSG00000117984/ENSG00000239264/ENSG00000197641/ENSG00000138744/ENSG00000179163/ENSG00000177830/ENSG00000164733/ENSG00000080824/ENSG00000138760/ENSG00000170266/ENSG00000136943/ENSG00000113273/ENSG00000005893/ENSG00000026297/ENSG00000086289/ENSG00000197746/ENSG00000107798/ENSG00000115884/ENSG00000119655…
GO:0051225	BP	GO:0051225	spindle assembly	124	-0.674012	-1.86274	2.09674e-05	0.00413626	0.00381459	2900	tags=34%, list=16%, signal=29%	ENSG00000103769/ENSG00000137822/ENSG00000072501/ENSG00000108424/ENSG00000137497/ENSG00000254505/ENSG00000130724/ENSG00000107816/ENSG00000126216/ENSG00000182504/ENSG00000196230/ENSG00000086065/ENSG00000149273/ENSG00000094914/ENSG00000152240/ENSG00000112029/ENSG00000183765/ENSG00000137807/ENSG00000115561/ENSG00000166974/ENSG00000121957/ENSG00000151849/ENSG00000076382/ENSG00000178999/ENSG00000117399…
GO:0016757	MF	GO:0016757	glycosyltransferase activity	203	-0.602392	-1.74789	2.09775e-05	0.00413626	0.00381459	3270	tags=39%, list=18%, signal=33%	ENSG00000179104/ENSG00000135454/ENSG00000070731/ENSG00000102699/ENSG00000176920/ENSG00000198856/ENSG00000161013/ENSG00000139629/ENSG00000213614/ENSG00000118600/ENSG00000172269/ENSG00000156966/ENSG00000176928/ENSG00000000419/ENSG00000162694/ENSG00000198931/ENSG00000149541/ENSG00000111846/ENSG00000012232/ENSG00000170340/ENSG00000158850/ENSG00000169255/ENSG00000117411/ENSG00000172986/ENSG00000106392…
GO:0005925	CC	GO:0005925	focal adhesion	387	-0.519349	-1.62373	2.46495e-05	0.00478986	0.00441735	2457	tags=31%, list=14%, signal=27%	ENSG00000125848/ENSG00000163466/ENSG00000204381/ENSG00000143363/ENSG00000110880/ENSG00000166913/ENSG00000198755/ENSG00000198910/ENSG00000115268/ENSG00000187446/ENSG00000146648/ENSG00000168807/ENSG00000129116/ENSG00000197756/ENSG00000231500/ENSG00000089009/ENSG00000136068/ENSG00000174444/ENSG00000149273/ENSG00000076706/ENSG00000117519/ENSG00000162736/ENSG00000138448/ENSG00000108298/ENSG00000123384…
GO:0009201	BP	GO:0009201	ribonucleoside triphosphate biosynthetic process	107	-0.676804	-1.83192	3.10921e-05	0.00595547	0.00549232	3631	tags=49%, list=20%, signal=39%	ENSG00000106617/ENSG00000198763/ENSG00000023228/ENSG00000167792/ENSG00000198786/ENSG00000169020/ENSG00000243678/ENSG00000198695/ENSG00000185883/ENSG00000212907/ENSG00000159199/ENSG00000239672/ENSG00000147684/ENSG00000065518/ENSG00000102125/ENSG00000140990/ENSG00000184983/ENSG00000158864/ENSG00000004779/ENSG00000125375/ENSG00000198886/ENSG00000117118/ENSG00000173915/ENSG00000125356/ENSG00000168653…
GO:0009142	BP	GO:0009142	nucleoside triphosphate biosynthetic process	114	-0.676678	-1.84168	3.77665e-05	0.00713202	0.00657736	3631	tags=49%, list=20%, signal=39%	ENSG00000106617/ENSG00000147853/ENSG00000198763/ENSG00000023228/ENSG00000167792/ENSG00000198786/ENSG00000169020/ENSG00000243678/ENSG00000198695/ENSG00000185883/ENSG00000212907/ENSG00000159199/ENSG00000239672/ENSG00000147684/ENSG00000065518/ENSG00000176890/ENSG00000102125/ENSG00000140990/ENSG00000184983/ENSG00000158864/ENSG00000004779/ENSG00000125375/ENSG00000198886/ENSG00000117118/ENSG00000173915…
GO:0051988	BP	GO:0051988	regulation of attachment of spindle microtubules to kinetochore	21	-0.899607	-1.91713	4.38032e-05	0.00772781	0.00712682	904	tags=52%, list=5%, signal=50%	ENSG00000184445/ENSG00000070831/ENSG00000128944/ENSG00000076382/ENSG00000178999/ENSG00000134690/ENSG00000149503/ENSG00000134057/ENSG00000089685/ENSG00000117650/ENSG00000161800
GO:0051310	BP	GO:0051310	metaphase chromosome alignment	98	-0.690846	-1.85159	4.29823e-05	0.00772781	0.00712682	3006	tags=43%, list=17%, signal=36%	ENSG00000163322/ENSG00000154839/ENSG00000103769/ENSG00000108424/ENSG00000137497/ENSG00000254505/ENSG00000130724/ENSG00000167513/ENSG00000152253/ENSG00000137812/ENSG00000086065/ENSG00000154473/ENSG00000118193/ENSG00000094880/ENSG00000114346/ENSG00000101447/ENSG00000079616/ENSG00000085415/ENSG00000149636/ENSG00000122952/ENSG00000115561/ENSG00000121621/ENSG00000138778/ENSG00000184445/ENSG00000161888…
GO:0070469	CC	GO:0070469	respirasome	98	-0.690225	-1.84992	4.3567e-05	0.00772781	0.00712682	3562	tags=53%, list=20%, signal=43%	ENSG00000198763/ENSG00000023228/ENSG00000167792/ENSG00000233954/ENSG00000178074/ENSG00000198786/ENSG00000131143/ENSG00000198695/ENSG00000212907/ENSG00000147684/ENSG00000010256/ENSG00000065518/ENSG00000140990/ENSG00000184983/ENSG00000198712/ENSG00000158864/ENSG00000164919/ENSG00000004779/ENSG00000135940/ENSG00000127540/ENSG00000112695/ENSG00000198886/ENSG00000178741/ENSG00000156467/ENSG00000117118…
GO:0005775	CC	GO:0005775	vacuolar lumen	133	-0.650266	-1.80368	4.22335e-05	0.00772781	0.00712682	1388	tags=39%, list=8%, signal=36%	ENSG00000196230/ENSG00000169919/ENSG00000103381/ENSG00000064601/ENSG00000137563/ENSG00000216490/ENSG00000054983/ENSG00000182718/ENSG00000162512/ENSG00000135047/ENSG00000001036/ENSG00000151176/ENSG00000149636/ENSG00000108828/ENSG00000057608/ENSG00000049860/ENSG00000188811/ENSG00000013288/ENSG00000114378/ENSG00000173083/ENSG00000156261/ENSG00000104763/ENSG00000135677/ENSG00000117592/ENSG00000117984…
GO:0005743	CC	GO:0005743	mitochondrial inner membrane	451	-0.489338	-1.54526	4.19047e-05	0.00772781	0.00712682	3875	tags=37%, list=22%, signal=29%	ENSG00000101019/ENSG00000176720/ENSG00000005059/ENSG00000066926/ENSG00000213619/ENSG00000175581/ENSG00000048544/ENSG00000132423/ENSG00000116221/ENSG00000014919/ENSG00000109519/ENSG00000185608/ENSG00000143224/ENSG00000108826/ENSG00000157184/ENSG00000167136/ENSG00000198763/ENSG00000101290/ENSG00000023228/ENSG00000167792/ENSG00000265354/ENSG00000233954/ENSG00000108528/ENSG00000136758/ENSG00000198786…
GO:0009206	BP	GO:0009206	purine ribonucleoside triphosphate biosynthetic process	101	-0.692259	-1.85842	4.79615e-05	0.00835154	0.00770204	3631	tags=50%, list=20%, signal=40%	ENSG00000106617/ENSG00000198763/ENSG00000023228/ENSG00000167792/ENSG00000198786/ENSG00000169020/ENSG00000243678/ENSG00000198695/ENSG00000185883/ENSG00000212907/ENSG00000159199/ENSG00000239672/ENSG00000147684/ENSG00000065518/ENSG00000102125/ENSG00000140990/ENSG00000184983/ENSG00000158864/ENSG00000004779/ENSG00000125375/ENSG00000198886/ENSG00000117118/ENSG00000173915/ENSG00000125356/ENSG00000168653…
GO:0030071	BP	GO:0030071	regulation of mitotic metaphase/anaphase transition	88	-0.712041	-1.88755	4.87752e-05	0.00838433	0.00773228	1300	tags=36%, list=7%, signal=34%	ENSG00000071539/ENSG00000108604/ENSG00000154473/ENSG00000094880/ENSG00000130177/ENSG00000110200/ENSG00000112029/ENSG00000122952/ENSG00000136518/ENSG00000080503/ENSG00000116670/ENSG00000138778/ENSG00000099385/ENSG00000184445/ENSG00000161888/ENSG00000112742/ENSG00000178999/ENSG00000117724/ENSG00000164754/ENSG00000117399/ENSG00000134690/ENSG00000166851/ENSG00000169679/ENSG00000149503/ENSG00000134057…
GO:0005667	CC	GO:0005667	transcription regulator complex	414	0.701726	1.85855	4.94237e-05	0.00838826	0.00773591	1466	tags=14%, list=8%, signal=13%	ENSG00000104856/ENSG00000162772/ENSG00000136826/ENSG00000133794/ENSG00000175197/ENSG00000136603/ENSG00000189060/ENSG00000059728/ENSG00000142611/ENSG00000165030/ENSG00000109320/ENSG00000123358/ENSG00000172216/ENSG00000185022/ENSG00000124766/ENSG00000112182/ENSG00000170689/ENSG00000171223/ENSG00000165684/ENSG00000153879/ENSG00000048052/ENSG00000156030/ENSG00000125398/ENSG00000116254/ENSG00000198517…
GO:1903121	BP	GO:1903121	regulation of TRAIL-activated apoptotic signaling pathway	3	0.998652	1.51141	5.25935e-05	0.00870585	0.0080288	2	tags=33%, list=0%, signal=33%	ENSG00000162772
GO:0036486	BP	GO:0036486	ventral trunk neural crest cell migration	3	-0.996738	-1.48617	5.23113e-05	0.00870585	0.0080288	38	tags=67%, list=0%, signal=67%	ENSG00000118257/ENSG00000001617
GO:0009145	BP	GO:0009145	purine nucleoside triphosphate biosynthetic process	102	-0.691861	-1.86321	6.18363e-05	0.00998916	0.00921231	3631	tags=50%, list=20%, signal=40%	ENSG00000106617/ENSG00000198763/ENSG00000023228/ENSG00000167792/ENSG00000198786/ENSG00000169020/ENSG00000243678/ENSG00000198695/ENSG00000185883/ENSG00000212907/ENSG00000159199/ENSG00000239672/ENSG00000147684/ENSG00000065518/ENSG00000102125/ENSG00000140990/ENSG00000184983/ENSG00000158864/ENSG00000004779/ENSG00000125375/ENSG00000198886/ENSG00000117118/ENSG00000173915/ENSG00000125356/ENSG00000168653…
GO:1990204	CC	GO:1990204	oxidoreductase complex	114	-0.670408	-1.82462	6.15619e-05	0.00998916	0.00921231	3562	tags=53%, list=20%, signal=42%	ENSG00000198763/ENSG00000023228/ENSG00000101365/ENSG00000167792/ENSG00000233954/ENSG00000198786/ENSG00000198695/ENSG00000119689/ENSG00000100243/ENSG00000212907/ENSG00000147684/ENSG00000010256/ENSG00000065518/ENSG00000140990/ENSG00000184983/ENSG00000158864/ENSG00000004779/ENSG00000108773/ENSG00000051523/ENSG00000127540/ENSG00000198886/ENSG00000156467/ENSG00000091140/ENSG00000117118/ENSG00000131828…
GO:0009060	BP	GO:0009060	aerobic respiration	187	-0.596231	-1.7293	6.39015e-05	0.0101999	0.00940666	3511	tags=51%, list=20%, signal=41%	ENSG00000023228/ENSG00000101365/ENSG00000167792/ENSG00000233954/ENSG00000178074/ENSG00000062485/ENSG00000198786/ENSG00000169020/ENSG00000239900/ENSG00000131143/ENSG00000198695/ENSG00000119689/ENSG00000212907/ENSG00000147684/ENSG00000010256/ENSG00000065518/ENSG00000125648/ENSG00000102125/ENSG00000140990/ENSG00000184983/ENSG00000198712/ENSG00000006695/ENSG00000158864/ENSG00000164919/ENSG00000004779…
GO:0051303	BP	GO:0051303	establishment of chromosome localization	105	-0.690223	-1.8657	6.59225e-05	0.0102778	0.00947847	3006	tags=42%, list=17%, signal=35%	ENSG00000163322/ENSG00000154839/ENSG00000103769/ENSG00000108424/ENSG00000137497/ENSG00000254505/ENSG00000130724/ENSG00000167513/ENSG00000152253/ENSG00000137812/ENSG00000086065/ENSG00000154473/ENSG00000118193/ENSG00000094880/ENSG00000072864/ENSG00000114346/ENSG00000101447/ENSG00000079616/ENSG00000085415/ENSG00000149636/ENSG00000122952/ENSG00000115561/ENSG00000121621/ENSG00000138778/ENSG00000184445…
GO:0016324	CC	GO:0016324	apical plasma membrane	250	-0.557013	-1.65857	6.57927e-05	0.0102778	0.00947847	2096	tags=26%, list=12%, signal=23%	ENSG00000163406/ENSG00000168575/ENSG00000114770/ENSG00000116039/ENSG00000198648/ENSG00000081923/ENSG00000197635/ENSG00000074410/ENSG00000163803/ENSG00000135750/ENSG00000135047/ENSG00000130303/ENSG00000162493/ENSG00000080031/ENSG00000110375/ENSG00000143153/ENSG00000080822/ENSG00000088836/ENSG00000131389/ENSG00000147649/ENSG00000152661/ENSG00000103222/ENSG00000165240/ENSG00000162738/ENSG00000166126…
GO:0016758	MF	GO:0016758	hexosyltransferase activity	151	-0.628961	-1.77019	6.94598e-05	0.0105845	0.00976131	3128	tags=42%, list=18%, signal=35%	ENSG00000176920/ENSG00000198856/ENSG00000161013/ENSG00000139629/ENSG00000213614/ENSG00000156966/ENSG00000176928/ENSG00000000419/ENSG00000162694/ENSG00000149541/ENSG00000111846/ENSG00000012232/ENSG00000170340/ENSG00000158850/ENSG00000169255/ENSG00000117411/ENSG00000106392/ENSG00000172461/ENSG00000163902/ENSG00000187210/ENSG00000158089/ENSG00000128274/ENSG00000163527/ENSG00000148154/ENSG00000033170…
GO:0034097	BP	GO:0034097	response to cytokine	651	0.624808	1.71153	6.94684e-05	0.0105845	0.00976131	868	tags=11%, list=5%, signal=11%	ENSG00000104856/ENSG00000023445/ENSG00000077150/ENSG00000136826/ENSG00000135114/ENSG00000056558/ENSG00000126368/ENSG00000083799/ENSG00000134070/ENSG00000232810/ENSG00000271503/ENSG00000105246/ENSG00000169429/ENSG00000127528/ENSG00000107201/ENSG00000104432/ENSG00000131323/ENSG00000136603/ENSG00000263528/ENSG00000118503/ENSG00000100906/ENSG00000164400/ENSG00000177169/ENSG00000120129/ENSG00000081041…
GO:0019199	MF	GO:0019199	transmembrane receptor protein kinase activity	58	-0.767744	-1.91218	7.6304e-05	0.011397	0.0105106	1233	tags=34%, list=7%, signal=32%	ENSG00000080224/ENSG00000146648/ENSG00000260001/ENSG00000153208/ENSG00000243364/ENSG00000107779/ENSG00000049323/ENSG00000108947/ENSG00000146904/ENSG00000123612/ENSG00000182580/ENSG00000141736/ENSG00000105976/ENSG00000160867/ENSG00000143590/ENSG00000133216/ENSG00000115380/ENSG00000171243/ENSG00000118257/ENSG00000069702
GO:0051983	BP	GO:0051983	regulation of chromosome segregation	122	-0.65837	-1.81523	7.65011e-05	0.011397	0.0105106	1342	tags=26%, list=8%, signal=24%	ENSG00000148773/ENSG00000122952/ENSG00000136518/ENSG00000121152/ENSG00000080503/ENSG00000116670/ENSG00000138778/ENSG00000099385/ENSG00000184445/ENSG00000161888/ENSG00000112742/ENSG00000178999/ENSG00000117724/ENSG00000164754/ENSG00000117399/ENSG00000134690/ENSG00000136824/ENSG00000109805/ENSG00000166851/ENSG00000170312/ENSG00000169679/ENSG00000149503/ENSG00000134057/ENSG00000089685/ENSG00000143228…
GO:0000122	BP	GO:0000122	negative regulation of transcription by RNA polymerase II	738	0.61642	1.70132	8.27881e-05	0.0121981	0.0112494	1463	tags=16%, list=8%, signal=15%	ENSG00000162772/ENSG00000136826/ENSG00000101255/ENSG00000155090/ENSG00000126368/ENSG00000265972/ENSG00000205189/ENSG00000232810/ENSG00000141582/ENSG00000127528/ENSG00000116717/ENSG00000175197/ENSG00000172059/ENSG00000095951/ENSG00000136603/ENSG00000118263/ENSG00000128917/ENSG00000059728/ENSG00000122386/ENSG00000142611/ENSG00000186642/ENSG00000165030/ENSG00000109320/ENSG00000125845/ENSG00000172216…
GO:0042773	BP	GO:0042773	ATP synthesis coupled electron transport	96	-0.693145	-1.86587	8.46187e-05	0.0121997	0.0112509	3562	tags=56%, list=20%, signal=45%	ENSG00000198763/ENSG00000023228/ENSG00000167792/ENSG00000233954/ENSG00000198786/ENSG00000131143/ENSG00000198695/ENSG00000212907/ENSG00000147684/ENSG00000010256/ENSG00000065518/ENSG00000102125/ENSG00000140990/ENSG00000184983/ENSG00000198712/ENSG00000158864/ENSG00000164919/ENSG00000004779/ENSG00000135940/ENSG00000127540/ENSG00000112695/ENSG00000198886/ENSG00000178741/ENSG00000156467/ENSG00000015475…
GO:0042775	BP	GO:0042775	mitochondrial ATP synthesis coupled electron transport	96	-0.693145	-1.86587	8.46187e-05	0.0121997	0.0112509	3562	tags=56%, list=20%, signal=45%	ENSG00000198763/ENSG00000023228/ENSG00000167792/ENSG00000233954/ENSG00000198786/ENSG00000131143/ENSG00000198695/ENSG00000212907/ENSG00000147684/ENSG00000010256/ENSG00000065518/ENSG00000102125/ENSG00000140990/ENSG00000184983/ENSG00000198712/ENSG00000158864/ENSG00000164919/ENSG00000004779/ENSG00000135940/ENSG00000127540/ENSG00000112695/ENSG00000198886/ENSG00000178741/ENSG00000156467/ENSG00000015475…
GO:0098800	CC	GO:0098800	inner mitochondrial membrane protein complex	152	-0.634325	-1.78829	8.93249e-05	0.0127411	0.0117503	3562	tags=49%, list=20%, signal=40%	ENSG00000198763/ENSG00000023228/ENSG00000167792/ENSG00000265354/ENSG00000233954/ENSG00000198786/ENSG00000169020/ENSG00000105197/ENSG00000131143/ENSG00000198695/ENSG00000205981/ENSG00000212907/ENSG00000159199/ENSG00000147684/ENSG00000010256/ENSG00000065518/ENSG00000174917/ENSG00000140990/ENSG00000184983/ENSG00000198712/ENSG00000158864/ENSG00000164919/ENSG00000215021/ENSG00000004779/ENSG00000006530…
GO:0008753	MF	GO:0008753	NADPH dehydrogenase (quinone) activity	3	-0.995882	-1.48489	9.11207e-05	0.0128605	0.0118603	4	tags=67%, list=0%, signal=67%	ENSG00000145439/ENSG00000181019
GO:0006664	BP	GO:0006664	glycolipid metabolic process	88	-0.701209	-1.85883	9.80321e-05	0.0135507	0.0124968	3277	tags=48%, list=18%, signal=39%	ENSG00000132356/ENSG00000135454/ENSG00000176920/ENSG00000213614/ENSG00000102393/ENSG00000197858/ENSG00000000419/ENSG00000151665/ENSG00000135845/ENSG00000158850/ENSG00000169255/ENSG00000144455/ENSG00000103089/ENSG00000054983/ENSG00000172461/ENSG00000110080/ENSG00000128274/ENSG00000161395/ENSG00000148154/ENSG00000107331/ENSG00000235863/ENSG00000148985/ENSG00000197563/ENSG00000049860/ENSG00000165282…
GO:1903509	BP	GO:1903509	liposaccharide metabolic process	88	-0.701209	-1.85883	9.80321e-05	0.0135507	0.0124968	3277	tags=48%, list=18%, signal=39%	ENSG00000132356/ENSG00000135454/ENSG00000176920/ENSG00000213614/ENSG00000102393/ENSG00000197858/ENSG00000000419/ENSG00000151665/ENSG00000135845/ENSG00000158850/ENSG00000169255/ENSG00000144455/ENSG00000103089/ENSG00000054983/ENSG00000172461/ENSG00000110080/ENSG00000128274/ENSG00000161395/ENSG00000148154/ENSG00000107331/ENSG00000235863/ENSG00000148985/ENSG00000197563/ENSG00000049860/ENSG00000165282…
GO:0000139	CC	GO:0000139	Golgi membrane	561	-0.462558	-1.49349	0.000101523	0.01389	0.0128098	3138	tags=34%, list=18%, signal=29%	ENSG00000100934/ENSG00000176920/ENSG00000184584/ENSG00000161013/ENSG00000177054/ENSG00000130958/ENSG00000139629/ENSG00000185883/ENSG00000134470/ENSG00000118600/ENSG00000197461/ENSG00000105223/ENSG00000100522/ENSG00000111711/ENSG00000164125/ENSG00000129354/ENSG00000111481/ENSG00000103769/ENSG00000167461/ENSG00000134250/ENSG00000156966/ENSG00000176928/ENSG00000148248/ENSG00000143457/ENSG00000169359…
GO:0007091	BP	GO:0007091	metaphase/anaphase transition of mitotic cell cycle	92	-0.702481	-1.87702	0.000104835	0.0140562	0.0129631	2626	tags=39%, list=15%, signal=34%	ENSG00000152253/ENSG00000137812/ENSG00000004897/ENSG00000071539/ENSG00000108604/ENSG00000154473/ENSG00000153107/ENSG00000094880/ENSG00000130177/ENSG00000110200/ENSG00000112029/ENSG00000122952/ENSG00000136518/ENSG00000080503/ENSG00000116670/ENSG00000138778/ENSG00000099385/ENSG00000184445/ENSG00000161888/ENSG00000112742/ENSG00000178999/ENSG00000117724/ENSG00000164754/ENSG00000117399/ENSG00000134690…
GO:0140534	CC	GO:0140534	endoplasmic reticulum protein-containing complex	118	-0.663715	-1.81859	0.000104736	0.0140562	0.0129631	1858	tags=44%, list=10%, signal=40%	ENSG00000114902/ENSG00000140612/ENSG00000197858/ENSG00000088832/ENSG00000135845/ENSG00000129128/ENSG00000204267/ENSG00000172057/ENSG00000127774/ENSG00000125037/ENSG00000163902/ENSG00000135506/ENSG00000163527/ENSG00000185624/ENSG00000166794/ENSG00000104723/ENSG00000166710/ENSG00000122884/ENSG00000161671/ENSG00000077232/ENSG00000129562/ENSG00000134910/ENSG00000169446/ENSG00000100596/ENSG00000186480…
GO:0098803	CC	GO:0098803	respiratory chain complex	87	-0.702282	-1.85619	0.000109946	0.0145957	0.0134606	3562	tags=56%, list=20%, signal=45%	ENSG00000198763/ENSG00000023228/ENSG00000167792/ENSG00000233954/ENSG00000198786/ENSG00000131143/ENSG00000198695/ENSG00000212907/ENSG00000147684/ENSG00000010256/ENSG00000065518/ENSG00000140990/ENSG00000184983/ENSG00000198712/ENSG00000158864/ENSG00000164919/ENSG00000004779/ENSG00000135940/ENSG00000127540/ENSG00000112695/ENSG00000198886/ENSG00000178741/ENSG00000156467/ENSG00000117118/ENSG00000125356…
GO:0030175	CC	GO:0030175	filopodium	82	-0.715023	-1.88726	0.000111791	0.014695	0.0135522	2838	tags=34%, list=16%, signal=29%	ENSG00000159217/ENSG00000005884/ENSG00000169604/ENSG00000247596/ENSG00000119328/ENSG00000119333/ENSG00000049130/ENSG00000078018/ENSG00000169760/ENSG00000138448/ENSG00000162493/ENSG00000241399/ENSG00000136167/ENSG00000171160/ENSG00000137710/ENSG00000070831/ENSG00000188042/ENSG00000154639/ENSG00000182957/ENSG00000150093/ENSG00000091409/ENSG00000111199/ENSG00000173402/ENSG00000092820/ENSG00000147065…
GO:0015485	MF	GO:0015485	cholesterol binding	40	-0.801086	-1.90114	0.000116705	0.0151364	0.0139592	2631	tags=45%, list=15%, signal=38%	ENSG00000109084/ENSG00000057252/ENSG00000116171/ENSG00000213585/ENSG00000010270/ENSG00000088002/ENSG00000185920/ENSG00000079156/ENSG00000110651/ENSG00000025434/ENSG00000155066/ENSG00000100300/ENSG00000141447/ENSG00000138760/ENSG00000147475/ENSG00000107566/ENSG00000119655/ENSG00000105974
GO:0060205	CC	GO:0060205	cytoplasmic vesicle lumen	230	-0.561406	-1.64607	0.000117406	0.0151364	0.0139592	1844	tags=31%, list=10%, signal=28%	ENSG00000196937/ENSG00000134996/ENSG00000146425/ENSG00000105329/ENSG00000079246/ENSG00000103811/ENSG00000001036/ENSG00000140319/ENSG00000196419/ENSG00000149636/ENSG00000166710/ENSG00000108828/ENSG00000057608/ENSG00000023318/ENSG00000049860/ENSG00000188811/ENSG00000173083/ENSG00000013563/ENSG00000156261/ENSG00000130402/ENSG00000171314/ENSG00000173801/ENSG00000169299/ENSG00000103196/ENSG00000100234…
GO:0007029	BP	GO:0007029	endoplasmic reticulum organization	90	-0.696933	-1.85021	0.000122739	0.0153803	0.0141842	2685	tags=36%, list=15%, signal=30%	ENSG00000136816/ENSG00000108588/ENSG00000141699/ENSG00000154153/ENSG00000086598/ENSG00000111684/ENSG00000127774/ENSG00000143183/ENSG00000125037/ENSG00000139641/ENSG00000095209/ENSG00000115310/ENSG00000185164/ENSG00000115255/ENSG00000168476/ENSG00000144320/ENSG00000161671/ENSG00000129625/ENSG00000169446/ENSG00000184743/ENSG00000103512/ENSG00000165476/ENSG00000127463/ENSG00000128463/ENSG00000084733…
GO:0019838	MF	GO:0019838	growth factor binding	95	-0.684834	-1.83549	0.000122486	0.0153803	0.0141842	1131	tags=23%, list=6%, signal=22%	ENSG00000049323/ENSG00000123612/ENSG00000064300/ENSG00000182704/ENSG00000141736/ENSG00000113594/ENSG00000115457/ENSG00000140988/ENSG00000091409/ENSG00000167779/ENSG00000068001/ENSG00000166033/ENSG00000160867/ENSG00000128791/ENSG00000102359/ENSG00000163453/ENSG00000090863/ENSG00000160712/ENSG00000118257/ENSG00000063660/ENSG00000156535/ENSG00000069702
GO:0010256	BP	GO:0010256	endomembrane system organization	484	-0.465347	-1.49017	0.000121698	0.0153803	0.0141842	2842	tags=24%, list=16%, signal=21%	ENSG00000138246/ENSG00000163354/ENSG00000148248/ENSG00000143457/ENSG00000254505/ENSG00000099203/ENSG00000120805/ENSG00000130724/ENSG00000136816/ENSG00000143553/ENSG00000108588/ENSG00000141699/ENSG00000154153/ENSG00000142156/ENSG00000137812/ENSG00000196535/ENSG00000176619/ENSG00000100099/ENSG00000075785/ENSG00000110880/ENSG00000086065/ENSG00000086598/ENSG00000177879/ENSG00000111684/ENSG00000011347…
GO:0034774	CC	GO:0034774	secretory granule lumen	228	-0.562259	-1.64825	0.000128396	0.0159401	0.0147005	1844	tags=32%, list=10%, signal=29%	ENSG00000196937/ENSG00000134996/ENSG00000146425/ENSG00000105329/ENSG00000079246/ENSG00000103811/ENSG00000001036/ENSG00000140319/ENSG00000196419/ENSG00000149636/ENSG00000166710/ENSG00000108828/ENSG00000057608/ENSG00000023318/ENSG00000049860/ENSG00000188811/ENSG00000173083/ENSG00000013563/ENSG00000156261/ENSG00000130402/ENSG00000171314/ENSG00000173801/ENSG00000169299/ENSG00000103196/ENSG00000100234…
GO:0031983	CC	GO:0031983	vesicle lumen	231	-0.559674	-1.6428	0.000134006	0.0164839	0.015202	1844	tags=31%, list=10%, signal=28%	ENSG00000196937/ENSG00000134996/ENSG00000146425/ENSG00000105329/ENSG00000079246/ENSG00000103811/ENSG00000001036/ENSG00000140319/ENSG00000196419/ENSG00000149636/ENSG00000166710/ENSG00000108828/ENSG00000057608/ENSG00000023318/ENSG00000049860/ENSG00000188811/ENSG00000173083/ENSG00000013563/ENSG00000156261/ENSG00000130402/ENSG00000171314/ENSG00000173801/ENSG00000169299/ENSG00000103196/ENSG00000100234…
GO:0022618	BP	GO:0022618	protein-RNA complex assembly	194	-0.587506	-1.70098	0.000135557	0.0165232	0.0152382	3479	tags=28%, list=20%, signal=23%	ENSG00000275464/ENSG00000092847/ENSG00000110107/ENSG00000174231/ENSG00000111786/ENSG00000115128/ENSG00000100353/ENSG00000118246/ENSG00000178982/ENSG00000144028/ENSG00000100129/ENSG00000200795/ENSG00000130741/ENSG00000108848/ENSG00000125445/ENSG00000125870/ENSG00000111605/ENSG00000082516/ENSG00000183207/ENSG00000125835/ENSG00000115268/ENSG00000079785/ENSG00000074201/ENSG00000089009/ENSG00000100650…
GO:0071826	BP	GO:0071826	protein-RNA complex organization	204	-0.577157	-1.67755	0.000140149	0.016929	0.0156124	3479	tags=26%, list=20%, signal=22%	ENSG00000275464/ENSG00000092847/ENSG00000110107/ENSG00000174231/ENSG00000111786/ENSG00000115128/ENSG00000100353/ENSG00000118246/ENSG00000178982/ENSG00000144028/ENSG00000100129/ENSG00000200795/ENSG00000130741/ENSG00000108848/ENSG00000125445/ENSG00000125870/ENSG00000111605/ENSG00000082516/ENSG00000183207/ENSG00000125835/ENSG00000115268/ENSG00000079785/ENSG00000074201/ENSG00000089009/ENSG00000100650…
GO:0051640	BP	GO:0051640	organelle localization	522	-0.456427	-1.46412	0.000143834	0.017219	0.0158799	3015	tags=26%, list=17%, signal=22%	ENSG00000140854/ENSG00000163322/ENSG00000185236/ENSG00000154839/ENSG00000129354/ENSG00000126756/ENSG00000108523/ENSG00000168036/ENSG00000103769/ENSG00000167461/ENSG00000108424/ENSG00000137497/ENSG00000254505/ENSG00000007255/ENSG00000114354/ENSG00000130724/ENSG00000165959/ENSG00000118242/ENSG00000143553/ENSG00000167513/ENSG00000152253/ENSG00000137812/ENSG00000108773/ENSG00000106009/ENSG00000124145…
GO:0051129	BP	GO:0051129	negative regulation of cellular component organization	597	-0.458728	-1.49041	0.000156178	0.0185313	0.0170901	2123	tags=21%, list=12%, signal=19%	ENSG00000188827/ENSG00000005448/ENSG00000158195/ENSG00000078018/ENSG00000198836/ENSG00000169760/ENSG00000004478/ENSG00000118193/ENSG00000156968/ENSG00000156509/ENSG00000138448/ENSG00000182718/ENSG00000114251/ENSG00000110200/ENSG00000197635/ENSG00000115310/ENSG00000095539/ENSG00000198898/ENSG00000136059/ENSG00000176142/ENSG00000204628/ENSG00000101843/ENSG00000105329/ENSG00000079246/ENSG00000112029…
GO:0006754	BP	GO:0006754	ATP biosynthetic process	92	-0.695711	-1.85893	0.000164141	0.0193052	0.0178039	3631	tags=52%, list=20%, signal=42%	ENSG00000106617/ENSG00000198763/ENSG00000023228/ENSG00000167792/ENSG00000198786/ENSG00000169020/ENSG00000198695/ENSG00000185883/ENSG00000212907/ENSG00000159199/ENSG00000147684/ENSG00000065518/ENSG00000102125/ENSG00000140990/ENSG00000184983/ENSG00000158864/ENSG00000004779/ENSG00000125375/ENSG00000198886/ENSG00000117118/ENSG00000173915/ENSG00000125356/ENSG00000168653/ENSG00000116459/ENSG00000119421…
GO:1902600	BP	GO:1902600	proton transmembrane transport	125	-0.635808	-1.75679	0.000178359	0.0207951	0.0191778	3496	tags=47%, list=20%, signal=38%	ENSG00000197496/ENSG00000138495/ENSG00000198786/ENSG00000169020/ENSG00000180638/ENSG00000131143/ENSG00000184584/ENSG00000146409/ENSG00000185883/ENSG00000159199/ENSG00000010256/ENSG00000198712/ENSG00000215021/ENSG00000135940/ENSG00000125375/ENSG00000198886/ENSG00000108179/ENSG00000178741/ENSG00000187446/ENSG00000163406/ENSG00000116459/ENSG00000173660/ENSG00000116039/ENSG00000198804/ENSG00000198689…
GO:0097490	BP	GO:0097490	sympathetic neuron projection extension	4	-0.991623	-1.54609	0.000181595	0.0208105	0.0191921	38	tags=75%, list=0%, signal=75%	ENSG00000075213/ENSG00000118257/ENSG00000001617
GO:0097491	BP	GO:0097491	sympathetic neuron projection guidance	4	-0.991623	-1.54609	0.000181595	0.0208105	0.0191921	38	tags=75%, list=0%, signal=75%	ENSG00000075213/ENSG00000118257/ENSG00000001617
GO:0072686	CC	GO:0072686	mitotic spindle	169	-0.615619	-1.75388	0.000187779	0.0213368	0.0196774	2006	tags=23%, list=11%, signal=21%	ENSG00000149273/ENSG00000094914/ENSG00000130177/ENSG00000152240/ENSG00000114346/ENSG00000101447/ENSG00000169607/ENSG00000108262/ENSG00000079616/ENSG00000134152/ENSG00000137807/ENSG00000121621/ENSG00000138778/ENSG00000170264/ENSG00000097046/ENSG00000116857/ENSG00000121957/ENSG00000143924/ENSG00000070831/ENSG00000128944/ENSG00000076382/ENSG00000178999/ENSG00000104833/ENSG00000237649/ENSG00000066279…
GO:0048185	MF	GO:0048185	activin binding	10	-0.934824	-1.73539	0.000192268	0.0216632	0.0199785	3	tags=20%, list=0%, signal=20%	ENSG00000135503/ENSG00000069702
GO:0001217	MF	GO:0001217	DNA-binding transcription repressor activity	208	0.758473	1.89046	0.000195661	0.0218619	0.0201617	1160	tags=19%, list=7%, signal=18%	ENSG00000162772/ENSG00000126368/ENSG00000205189/ENSG00000095951/ENSG00000136603/ENSG00000059728/ENSG00000122386/ENSG00000142611/ENSG00000165030/ENSG00000109320/ENSG00000172216/ENSG00000171940/ENSG00000157557/ENSG00000112182/ENSG00000118922/ENSG00000173276/ENSG00000172818/ENSG00000104447/ENSG00000124216/ENSG00000116809/ENSG00000135111/ENSG00000139083/ENSG00000198517/ENSG00000118689/ENSG00000019549…
GO:0000281	BP	GO:0000281	mitotic cytokinesis	84	-0.694355	-1.82875	0.000215909	0.0239248	0.0220642	1833	tags=31%, list=10%, signal=28%	ENSG00000021574/ENSG00000114346/ENSG00000133026/ENSG00000143761/ENSG00000143543/ENSG00000172757/ENSG00000115306/ENSG00000137807/ENSG00000115561/ENSG00000178999/ENSG00000134690/ENSG00000090889/ENSG00000138180/ENSG00000166851/ENSG00000122966/ENSG00000067560/ENSG00000011426/ENSG00000149503/ENSG00000140575/ENSG00000089685/ENSG00000115163/ENSG00000136108/ENSG00000161800/ENSG00000137804/ENSG00000117632…
GO:0001227	MF	GO:0001227	DNA-binding transcription repressor activity, RNA polymerase II-specific	200	0.763233	1.89054	0.000224225	0.0246427	0.0227263	1160	tags=20%, list=7%, signal=18%	ENSG00000162772/ENSG00000126368/ENSG00000205189/ENSG00000095951/ENSG00000136603/ENSG00000059728/ENSG00000122386/ENSG00000142611/ENSG00000165030/ENSG00000109320/ENSG00000172216/ENSG00000171940/ENSG00000157557/ENSG00000112182/ENSG00000118922/ENSG00000173276/ENSG00000172818/ENSG00000104447/ENSG00000124216/ENSG00000116809/ENSG00000135111/ENSG00000139083/ENSG00000198517/ENSG00000118689/ENSG00000019549…
GO:0005746	CC	GO:0005746	mitochondrial respirasome	90	-0.688419	-1.82761	0.000227942	0.0248475	0.0229151	3562	tags=54%, list=20%, signal=44%	ENSG00000198763/ENSG00000023228/ENSG00000167792/ENSG00000233954/ENSG00000198786/ENSG00000131143/ENSG00000198695/ENSG00000212907/ENSG00000147684/ENSG00000010256/ENSG00000065518/ENSG00000140990/ENSG00000184983/ENSG00000198712/ENSG00000158864/ENSG00000164919/ENSG00000004779/ENSG00000135940/ENSG00000127540/ENSG00000112695/ENSG00000198886/ENSG00000178741/ENSG00000156467/ENSG00000117118/ENSG00000125356…
GO:0033044	BP	GO:0033044	regulation of chromosome organization	237	-0.532357	-1.57543	0.000231229	0.0250026	0.0230581	3009	tags=29%, list=17%, signal=24%	ENSG00000163468/ENSG00000092199/ENSG00000089053/ENSG00000075624/ENSG00000168036/ENSG00000153147/ENSG00000175643/ENSG00000137497/ENSG00000151503/ENSG00000152253/ENSG00000107960/ENSG00000137812/ENSG00000183207/ENSG00000004897/ENSG00000113810/ENSG00000071539/ENSG00000108604/ENSG00000154473/ENSG00000153107/ENSG00000188827/ENSG00000153391/ENSG00000094880/ENSG00000150753/ENSG00000130177/ENSG00000110200…
GO:0140546	BP	GO:0140546	defense response to symbiont	699	0.60611	1.66527	0.000249282	0.026739	0.0246595	845	tags=10%, list=5%, signal=10%	ENSG00000104856/ENSG00000023445/ENSG00000077150/ENSG00000135114/ENSG00000010810/ENSG00000169896/ENSG00000126368/ENSG00000083799/ENSG00000134070/ENSG00000232810/ENSG00000271503/ENSG00000125730/ENSG00000169429/ENSG00000107201/ENSG00000145911/ENSG00000141682/ENSG00000148346/ENSG00000131323/ENSG00000263528/ENSG00000118503/ENSG00000100906/ENSG00000069399/ENSG00000081041/ENSG00000109320/ENSG00000145901…
GO:0045087	BP	GO:0045087	innate immune response	619	0.611824	1.6743	0.000257132	0.0273621	0.0252342	845	tags=10%, list=5%, signal=10%	ENSG00000104856/ENSG00000023445/ENSG00000077150/ENSG00000135114/ENSG00000010810/ENSG00000169896/ENSG00000126368/ENSG00000083799/ENSG00000134070/ENSG00000232810/ENSG00000271503/ENSG00000125730/ENSG00000107201/ENSG00000145911/ENSG00000148346/ENSG00000131323/ENSG00000263528/ENSG00000118503/ENSG00000100906/ENSG00000109320/ENSG00000145901/ENSG00000124107/ENSG00000185507/ENSG00000127666/ENSG00000163121…
GO:0098858	CC	GO:0098858	actin-based cell projection	166	-0.580638	-1.64694	0.000270185	0.0285248	0.0263064	2901	tags=28%, list=16%, signal=23%	ENSG00000168036/ENSG00000159217/ENSG00000005884/ENSG00000104327/ENSG00000169604/ENSG00000247596/ENSG00000119328/ENSG00000119333/ENSG00000049130/ENSG00000125124/ENSG00000078018/ENSG00000169760/ENSG00000116039/ENSG00000138448/ENSG00000081923/ENSG00000120756/ENSG00000103942/ENSG00000105329/ENSG00000162493/ENSG00000107159/ENSG00000080031/ENSG00000139209/ENSG00000241399/ENSG00000131389/ENSG00000165240…
GO:0006457	BP	GO:0006457	protein folding	184	-0.582161	-1.68439	0.000274709	0.0287757	0.0265378	3009	tags=35%, list=17%, signal=30%	ENSG00000163468/ENSG00000173486/ENSG00000197930/ENSG00000167280/ENSG00000166855/ENSG00000088832/ENSG00000140553/ENSG00000126602/ENSG00000110711/ENSG00000102218/ENSG00000136816/ENSG00000108588/ENSG00000143401/ENSG00000115275/ENSG00000088247/ENSG00000183207/ENSG00000108179/ENSG00000089248/ENSG00000186687/ENSG00000151465/ENSG00000004478/ENSG00000100591/ENSG00000150753/ENSG00000127022/ENSG00000171960…
GO:0045321	BP	GO:0045321	leukocyte activation	632	0.614301	1.67969	0.000286792	0.0298086	0.0274904	931	tags=12%, list=5%, signal=12%	ENSG00000104856/ENSG00000100867/ENSG00000049249/ENSG00000010810/ENSG00000169896/ENSG00000126368/ENSG00000083799/ENSG00000232810/ENSG00000271503/ENSG00000105246/ENSG00000169429/ENSG00000124762/ENSG00000104432/ENSG00000118503/ENSG00000128917/ENSG00000067082/ENSG00000185950/ENSG00000069399/ENSG00000164400/ENSG00000165030/ENSG00000104951/ENSG00000172216/ENSG00000095752/ENSG00000145777/ENSG00000124766…
GO:0051306	BP	GO:0051306	mitotic sister chromatid separation	61	-0.747336	-1.87645	0.000301247	0.0307567	0.0283648	1989	tags=43%, list=11%, signal=38%	ENSG00000094880/ENSG00000130177/ENSG00000110200/ENSG00000112029/ENSG00000105568/ENSG00000122952/ENSG00000116670/ENSG00000184445/ENSG00000161888/ENSG00000112742/ENSG00000178999/ENSG00000117724/ENSG00000164754/ENSG00000117399/ENSG00000134690/ENSG00000166851/ENSG00000169679/ENSG00000149503/ENSG00000134057/ENSG00000089685/ENSG00000143228/ENSG00000156970/ENSG00000175063/ENSG00000164109/ENSG00000080986…
GO:0043011	BP	GO:0043011	myeloid dendritic cell differentiation	12	0.984235	1.85069	0.000302434	0.0307567	0.0283648	135	tags=25%, list=1%, signal=25%	ENSG00000104856/ENSG00000100867/ENSG00000164400
GO:0005788	CC	GO:0005788	endoplasmic reticulum lumen	226	-0.548143	-1.6112	0.000302796	0.0307567	0.0283648	1721	tags=33%, list=10%, signal=30%	ENSG00000164291/ENSG00000100342/ENSG00000141756/ENSG00000001036/ENSG00000185624/ENSG00000166794/ENSG00000091136/ENSG00000166710/ENSG00000167123/ENSG00000122884/ENSG00000077232/ENSG00000023318/ENSG00000101846/ENSG00000104805/ENSG00000102854/ENSG00000049323/ENSG00000164054/ENSG00000169174/ENSG00000136026/ENSG00000126777/ENSG00000114200/ENSG00000065618/ENSG00000197565/ENSG00000140943/ENSG00000088298…
GO:0010965	BP	GO:0010965	regulation of mitotic sister chromatid separation	58	-0.748411	-1.86403	0.000308238	0.0309018	0.0284986	1012	tags=43%, list=6%, signal=41%	ENSG00000094880/ENSG00000130177/ENSG00000110200/ENSG00000112029/ENSG00000122952/ENSG00000116670/ENSG00000184445/ENSG00000161888/ENSG00000112742/ENSG00000178999/ENSG00000117724/ENSG00000164754/ENSG00000117399/ENSG00000134690/ENSG00000166851/ENSG00000169679/ENSG00000149503/ENSG00000134057/ENSG00000089685/ENSG00000143228/ENSG00000156970/ENSG00000175063/ENSG00000164109/ENSG00000080986/ENSG00000126787
GO:0002521	BP	GO:0002521	leukocyte differentiation	434	0.667159	1.78274	0.000313444	0.0309018	0.0284986	833	tags=12%, list=5%, signal=11%	ENSG00000104856/ENSG00000100867/ENSG00000049249/ENSG00000155090/ENSG00000083799/ENSG00000232810/ENSG00000104432/ENSG00000128917/ENSG00000067082/ENSG00000069399/ENSG00000164400/ENSG00000165030/ENSG00000125845/ENSG00000104951/ENSG00000172216/ENSG00000095752/ENSG00000124766/ENSG00000128342/ENSG00000185507/ENSG00000115604/ENSG00000064932/ENSG00000184371/ENSG00000112715/ENSG00000163874/ENSG00000128590…
GO:0009055	MF	GO:0009055	electron transfer activity	104	-0.653125	-1.76445	0.000310798	0.0309018	0.0284986	3562	tags=53%, list=20%, signal=43%	ENSG00000198763/ENSG00000023228/ENSG00000105379/ENSG00000101365/ENSG00000167792/ENSG00000198786/ENSG00000151552/ENSG00000131143/ENSG00000198695/ENSG00000212907/ENSG00000162482/ENSG00000147684/ENSG00000010256/ENSG00000065518/ENSG00000140990/ENSG00000053371/ENSG00000184983/ENSG00000198712/ENSG00000158864/ENSG00000042286/ENSG00000135940/ENSG00000051523/ENSG00000127540/ENSG00000198886/ENSG00000111275…
GO:0006790	BP	GO:0006790	sulfur compound metabolic process	240	-0.547153	-1.6207	0.00031235	0.0309018	0.0284986	2762	tags=37%, list=16%, signal=32%	ENSG00000162694/ENSG00000130377/ENSG00000149541/ENSG00000183196/ENSG00000012232/ENSG00000170340/ENSG00000010404/ENSG00000131069/ENSG00000140284/ENSG00000139531/ENSG00000148834/ENSG00000169919/ENSG00000038274/ENSG00000091140/ENSG00000070614/ENSG00000131828/ENSG00000134202/ENSG00000102172/ENSG00000146085/ENSG00000037757/ENSG00000197296/ENSG00000182551/ENSG00000076555/ENSG00000105953/ENSG00000110080…
GO:0008608	BP	GO:0008608	attachment of spindle microtubules to kinetochore	52	-0.789348	-1.9418	0.000317466	0.0310699	0.0286536	1484	tags=37%, list=8%, signal=34%	ENSG00000085415/ENSG00000149636/ENSG00000138778/ENSG00000184445/ENSG00000161888/ENSG00000143924/ENSG00000070831/ENSG00000128944/ENSG00000076382/ENSG00000178999/ENSG00000134690/ENSG00000149503/ENSG00000134057/ENSG00000089685/ENSG00000143228/ENSG00000117650/ENSG00000161800/ENSG00000080986/ENSG00000142945
GO:0051604	BP	GO:0051604	protein maturation	439	-0.472248	-1.49712	0.000320872	0.0311758	0.0287512	2936	tags=30%, list=16%, signal=26%	ENSG00000197930/ENSG00000142875/ENSG00000114902/ENSG00000182512/ENSG00000140612/ENSG00000167280/ENSG00000166855/ENSG00000088832/ENSG00000140553/ENSG00000165898/ENSG00000126602/ENSG00000110711/ENSG00000102218/ENSG00000136816/ENSG00000143553/ENSG00000108588/ENSG00000004779/ENSG00000147164/ENSG00000100600/ENSG00000138161/ENSG00000027001/ENSG00000143401/ENSG00000115275/ENSG00000129128/ENSG00000088247…
GO:0005496	MF	GO:0005496	steroid binding	76	-0.705137	-1.81531	0.000331372	0.031736	0.0292679	2197	tags=32%, list=12%, signal=28%	ENSG00000116171/ENSG00000108786/ENSG00000213585/ENSG00000128602/ENSG00000010270/ENSG00000088002/ENSG00000185920/ENSG00000079156/ENSG00000101856/ENSG00000110651/ENSG00000186480/ENSG00000025434/ENSG00000164040/ENSG00000155066/ENSG00000100300/ENSG00000141447/ENSG00000182749/ENSG00000138760/ENSG00000147475/ENSG00000163399/ENSG00000170915/ENSG00000107566/ENSG00000119655/ENSG00000105974
GO:0061640	BP	GO:0061640	cytoskeleton-dependent cytokinesis	108	-0.638933	-1.73035	0.000329372	0.031736	0.0292679	1833	tags=25%, list=10%, signal=23%	ENSG00000021574/ENSG00000114346/ENSG00000133026/ENSG00000143761/ENSG00000143543/ENSG00000172757/ENSG00000115306/ENSG00000137807/ENSG00000115561/ENSG00000178999/ENSG00000134690/ENSG00000090889/ENSG00000138180/ENSG00000166851/ENSG00000138071/ENSG00000122966/ENSG00000067560/ENSG00000011426/ENSG00000149503/ENSG00000140575/ENSG00000089685/ENSG00000115163/ENSG00000136108/ENSG00000161800/ENSG00000137804…
GO:0045839	BP	GO:0045839	negative regulation of mitotic nuclear division	54	-0.733871	-1.80918	0.000340656	0.0323938	0.0298745	1300	tags=37%, list=7%, signal=34%	ENSG00000122952/ENSG00000116670/ENSG00000184445/ENSG00000161888/ENSG00000112742/ENSG00000178999/ENSG00000117724/ENSG00000164754/ENSG00000117399/ENSG00000134690/ENSG00000166851/ENSG00000169679/ENSG00000125378/ENSG00000149503/ENSG00000134057/ENSG00000089685/ENSG00000143228/ENSG00000156970/ENSG00000164109/ENSG00000080986
GO:0030667	CC	GO:0030667	secretory granule membrane	216	-0.55403	-1.61971	0.00036346	0.0343188	0.0316498	3126	tags=40%, list=18%, signal=34%	ENSG00000184584/ENSG00000129003/ENSG00000108219/ENSG00000131504/ENSG00000160255/ENSG00000146409/ENSG00000185883/ENSG00000116473/ENSG00000138279/ENSG00000116815/ENSG00000186792/ENSG00000138246/ENSG00000163354/ENSG00000163531/ENSG00000148248/ENSG00000085063/ENSG00000169692/ENSG00000125257/ENSG00000129083/ENSG00000138161/ENSG00000204525/ENSG00000198053/ENSG00000051523/ENSG00000169851/ENSG00000140284…
GO:0035726	BP	GO:0035726	common myeloid progenitor cell proliferation	6	-0.977189	-1.63966	0.000370939	0.0347775	0.0320729	137	tags=50%, list=1%, signal=50%	ENSG00000143772/ENSG00000107798/ENSG00000084207
GO:0045333	BP	GO:0045333	cellular respiration	223	-0.542978	-1.59202	0.000373505	0.0347775	0.0320729	3511	tags=47%, list=20%, signal=38%	ENSG00000023228/ENSG00000105379/ENSG00000101365/ENSG00000167792/ENSG00000233954/ENSG00000178074/ENSG00000062485/ENSG00000198786/ENSG00000169020/ENSG00000239900/ENSG00000131143/ENSG00000198695/ENSG00000203668/ENSG00000119689/ENSG00000212907/ENSG00000147684/ENSG00000010256/ENSG00000065518/ENSG00000125648/ENSG00000102125/ENSG00000140990/ENSG00000184983/ENSG00000198712/ENSG00000126602/ENSG00000006695…
GO:0000910	BP	GO:0000910	cytokinesis	166	-0.576211	-1.63439	0.000383403	0.0354529	0.0326957	1833	tags=23%, list=10%, signal=21%	ENSG00000183856/ENSG00000118193/ENSG00000021574/ENSG00000114346/ENSG00000108262/ENSG00000133026/ENSG00000166582/ENSG00000143761/ENSG00000143543/ENSG00000143933/ENSG00000172757/ENSG00000115306/ENSG00000137807/ENSG00000115561/ENSG00000070831/ENSG00000178999/ENSG00000134690/ENSG00000090889/ENSG00000198901/ENSG00000138180/ENSG00000166851/ENSG00000129173/ENSG00000138071/ENSG00000122966/ENSG00000067560…
GO:0098542	BP	GO:0098542	defense response to other organism	757	0.592507	1.64045	0.000386112	0.0354588	0.0327012	875	tags=10%, list=5%, signal=9%	ENSG00000104856/ENSG00000023445/ENSG00000077150/ENSG00000135114/ENSG00000010810/ENSG00000169896/ENSG00000126368/ENSG00000083799/ENSG00000134070/ENSG00000232810/ENSG00000271503/ENSG00000125730/ENSG00000169429/ENSG00000107201/ENSG00000145911/ENSG00000141682/ENSG00000148346/ENSG00000131323/ENSG00000263528/ENSG00000118503/ENSG00000100906/ENSG00000069399/ENSG00000081041/ENSG00000109320/ENSG00000145901…
GO:0030246	MF	GO:0030246	carbohydrate binding	143	-0.605083	-1.69441	0.000397419	0.0362489	0.0334299	2054	tags=38%, list=12%, signal=34%	ENSG00000110852/ENSG00000111325/ENSG00000127022/ENSG00000072682/ENSG00000188883/ENSG00000196937/ENSG00000135506/ENSG00000136960/ENSG00000158089/ENSG00000185164/ENSG00000143891/ENSG00000241399/ENSG00000178234/ENSG00000116661/ENSG00000119514/ENSG00000122884/ENSG00000235194/ENSG00000114480/ENSG00000013288/ENSG00000114988/ENSG00000103512/ENSG00000129521/ENSG00000106397/ENSG00000141429/ENSG00000152556…
GO:0097028	BP	GO:0097028	dendritic cell differentiation	26	0.953432	1.96917	0.000407167	0.0368871	0.0340184	178	tags=15%, list=1%, signal=15%	ENSG00000104856/ENSG00000100867/ENSG00000164400/ENSG00000172216
GO:0001775	BP	GO:0001775	cell activation	733	0.597188	1.64746	0.00041331	0.0371924	0.0342999	868	tags=10%, list=5%, signal=10%	ENSG00000104856/ENSG00000100867/ENSG00000049249/ENSG00000077150/ENSG00000010810/ENSG00000169896/ENSG00000126368/ENSG00000083799/ENSG00000232810/ENSG00000271503/ENSG00000105246/ENSG00000169429/ENSG00000124762/ENSG00000104432/ENSG00000118503/ENSG00000173432/ENSG00000128917/ENSG00000067082/ENSG00000185950/ENSG00000069399/ENSG00000164400/ENSG00000176907/ENSG00000165030/ENSG00000104951/ENSG00000172216…
GO:0015935	CC	GO:0015935	small ribosomal subunit	75	-0.707487	-1.82442	0.000426411	0.0381155	0.0351512	3181	tags=47%, list=18%, signal=38%	ENSG00000116898/ENSG00000142534/ENSG00000144029/ENSG00000144895/ENSG00000125445/ENSG00000186468/ENSG00000118181/ENSG00000143947/ENSG00000061794/ENSG00000102738/ENSG00000115268/ENSG00000120333/ENSG00000231500/ENSG00000134419/ENSG00000149273/ENSG00000113048/ENSG00000008988/ENSG00000132300/ENSG00000204628/ENSG00000138326/ENSG00000221983/ENSG00000137154/ENSG00000143486/ENSG00000233927/ENSG00000204568…
GO:1990904	CC	GO:1990904	ribonucleoprotein complex	681	-0.426532	-1.40135	0.000444235	0.0394457	0.0363781	3633	tags=27%, list=20%, signal=23%	ENSG00000185608/ENSG00000125691/ENSG00000108826/ENSG00000001497/ENSG00000164167/ENSG00000170889/ENSG00000116001/ENSG00000138668/ENSG00000110367/ENSG00000134987/ENSG00000197157/ENSG00000137818/ENSG00000060688/ENSG00000275464/ENSG00000092847/ENSG00000110107/ENSG00000174231/ENSG00000130826/ENSG00000122085/ENSG00000144713/ENSG00000039123/ENSG00000126945/ENSG00000116251/ENSG00000122692/ENSG00000115128…
GO:0046718	BP	GO:0046718	symbiont entry into host cell	117	-0.640048	-1.75448	0.000450497	0.0394789	0.0364086	2230	tags=35%, list=13%, signal=31%	ENSG00000146648/ENSG00000085832/ENSG00000177707/ENSG00000168575/ENSG00000121236/ENSG00000167085/ENSG00000138448/ENSG00000197635/ENSG00000143324/ENSG00000185885/ENSG00000146425/ENSG00000135047/ENSG00000130202/ENSG00000142089/ENSG00000185624/ENSG00000105281/ENSG00000110651/ENSG00000108947/ENSG00000206053/ENSG00000144891/ENSG00000185896/ENSG00000154639/ENSG00000112335/ENSG00000150093/ENSG00000117335…
GO:1901681	MF	GO:1901681	sulfur compound binding	164	-0.57857	-1.63987	0.000449286	0.0394789	0.0364086	2383	tags=34%, list=13%, signal=29%	ENSG00000110492/ENSG00000165819/ENSG00000100982/ENSG00000152455/ENSG00000170835/ENSG00000138382/ENSG00000116171/ENSG00000176244/ENSG00000134202/ENSG00000137440/ENSG00000136235/ENSG00000156140/ENSG00000076555/ENSG00000123384/ENSG00000105953/ENSG00000112761/ENSG00000104332/ENSG00000040608/ENSG00000100983/ENSG00000085871/ENSG00000185920/ENSG00000197093/ENSG00000136999/ENSG00000103196/ENSG00000148344…
GO:0002274	BP	GO:0002274	myeloid leukocyte activation	133	0.794239	1.89104	0.000467093	0.0406674	0.0375047	486	tags=13%, list=3%, signal=13%	ENSG00000104856/ENSG00000100867/ENSG00000169896/ENSG00000126368/ENSG00000232810/ENSG00000271503/ENSG00000169429/ENSG00000164400/ENSG00000145777/ENSG00000127666/ENSG00000064932/ENSG00000184371/ENSG00000163874/ENSG00000124875/ENSG00000115414/ENSG00000176170/ENSG00000092929
GO:0019646	BP	GO:0019646	aerobic electron transport chain	88	-0.670781	-1.77817	0.000498044	0.0430824	0.0397319	3562	tags=55%, list=20%, signal=44%	ENSG00000198763/ENSG00000023228/ENSG00000167792/ENSG00000233954/ENSG00000198786/ENSG00000131143/ENSG00000198695/ENSG00000212907/ENSG00000147684/ENSG00000010256/ENSG00000065518/ENSG00000140990/ENSG00000184983/ENSG00000198712/ENSG00000158864/ENSG00000164919/ENSG00000004779/ENSG00000135940/ENSG00000127540/ENSG00000112695/ENSG00000198886/ENSG00000178741/ENSG00000156467/ENSG00000091140/ENSG00000117118…
GO:0008194	MF	GO:0008194	UDP-glycosyltransferase activity	106	-0.650047	-1.75969	0.000513772	0.0438768	0.0404645	3114	tags=45%, list=17%, signal=38%	ENSG00000161013/ENSG00000139629/ENSG00000213614/ENSG00000118600/ENSG00000156966/ENSG00000176928/ENSG00000162694/ENSG00000149541/ENSG00000111846/ENSG00000012232/ENSG00000170340/ENSG00000158850/ENSG00000169255/ENSG00000117411/ENSG00000172986/ENSG00000187210/ENSG00000158089/ENSG00000128274/ENSG00000148154/ENSG00000235863/ENSG00000178234/ENSG00000179913/ENSG00000119514/ENSG00000049860/ENSG00000114378…
GO:1901136	BP	GO:1901136	carbohydrate derivative catabolic process	210	-0.539559	-1.57384	0.000513088	0.0438768	0.0404645	2619	tags=35%, list=15%, signal=30%	ENSG00000154328/ENSG00000142156/ENSG00000010404/ENSG00000241935/ENSG00000171105/ENSG00000158122/ENSG00000117151/ENSG00000144455/ENSG00000169919/ENSG00000113552/ENSG00000156515/ENSG00000243811/ENSG00000076685/ENSG00000134333/ENSG00000128394/ENSG00000054983/ENSG00000151388/ENSG00000136159/ENSG00000067225/ENSG00000198162/ENSG00000197296/ENSG00000106268/ENSG00000272325/ENSG00000105953/ENSG00000175567…
GO:0032934	MF	GO:0032934	sterol binding	51	-0.756353	-1.84482	0.000546478	0.0463745	0.042768	1934	tags=39%, list=11%, signal=35%	ENSG00000109084/ENSG00000057252/ENSG00000116171/ENSG00000213585/ENSG00000128602/ENSG00000010270/ENSG00000088002/ENSG00000185920/ENSG00000079156/ENSG00000110651/ENSG00000186480/ENSG00000025434/ENSG00000155066/ENSG00000100300/ENSG00000141447/ENSG00000138760/ENSG00000147475/ENSG00000107566/ENSG00000119655/ENSG00000105974
GO:0015934	CC	GO:0015934	large ribosomal subunit	113	-0.630894	-1.71089	0.000561643	0.0473617	0.0436784	3964	tags=49%, list=22%, signal=38%	ENSG00000182899/ENSG00000166902/ENSG00000071082/ENSG00000175581/ENSG00000171490/ENSG00000116221/ENSG00000185608/ENSG00000125691/ENSG00000108826/ENSG00000137818/ENSG00000122085/ENSG00000144713/ENSG00000116251/ENSG00000037241/ENSG00000055950/ENSG00000158042/ENSG00000100316/ENSG00000172172/ENSG00000106591/ENSG00000111639/ENSG00000278845/ENSG00000198755/ENSG00000197756/ENSG00000089009/ENSG00000198242…
GO:1903131	BP	GO:1903131	mononuclear cell differentiation	331	0.697652	1.8127	0.000568376	0.0476299	0.0439257	1042	tags=14%, list=6%, signal=14%	ENSG00000104856/ENSG00000100867/ENSG00000049249/ENSG00000083799/ENSG00000104432/ENSG00000128917/ENSG00000067082/ENSG00000069399/ENSG00000164400/ENSG00000165030/ENSG00000104951/ENSG00000172216/ENSG00000095752/ENSG00000124766/ENSG00000185507/ENSG00000115604/ENSG00000184371/ENSG00000112715/ENSG00000163874/ENSG00000128590/ENSG00000171223/ENSG00000153879/ENSG00000048052/ENSG00000110944/ENSG00000112299…
GO:0051642	BP	GO:0051642	centrosome localization	30	-0.835485	-1.8688	0.000606765	0.0481351	0.0443917	1004	tags=33%, list=6%, signal=32%	ENSG00000064102/ENSG00000072864/ENSG00000100242/ENSG00000121957/ENSG00000164828/ENSG00000066279/ENSG00000087586/ENSG00000092820/ENSG00000164109/ENSG00000126787
GO:0061842	BP	GO:0061842	microtubule organizing center localization	30	-0.835485	-1.8688	0.000606765	0.0481351	0.0443917	1004	tags=33%, list=6%, signal=32%	ENSG00000064102/ENSG00000072864/ENSG00000100242/ENSG00000121957/ENSG00000164828/ENSG00000066279/ENSG00000087586/ENSG00000092820/ENSG00000164109/ENSG00000126787
GO:0016860	MF	GO:0016860	intramolecular oxidoreductase activity	38	-0.779322	-1.82201	0.000616535	0.0481351	0.0443917	2455	tags=55%, list=14%, signal=48%	ENSG00000099977/ENSG00000104823/ENSG00000037757/ENSG00000147155/ENSG00000165661/ENSG00000185624/ENSG00000023318/ENSG00000139921/ENSG00000148344/ENSG00000142892/ENSG00000123179/ENSG00000111669/ENSG00000239264/ENSG00000240972/ENSG00000155660/ENSG00000105220/ENSG00000167004/ENSG00000143870/ENSG00000110958/ENSG00000198721/ENSG00000167600
GO:0016620	MF	GO:0016620	oxidoreductase activity, acting on the aldehyde or oxo group of donors, NAD or NADP as acceptor	32	-0.798628	-1.80734	0.000601094	0.0481351	0.0443917	2422	tags=53%, list=14%, signal=46%	ENSG00000111275/ENSG00000091140/ENSG00000197894/ENSG00000072042/ENSG00000131828/ENSG00000105953/ENSG00000164904/ENSG00000184254/ENSG00000137124/ENSG00000168291/ENSG00000059573/ENSG00000006534/ENSG00000150768/ENSG00000072210/ENSG00000111640/ENSG00000196139/ENSG00000108602
GO:0005766	CC	GO:0005766	primary lysosome	121	-0.629866	-1.72904	0.000591307	0.0481351	0.0443917	2432	tags=40%, list=14%, signal=35%	ENSG00000135404/ENSG00000153395/ENSG00000196230/ENSG00000169919/ENSG00000118640/ENSG00000103381/ENSG00000064601/ENSG00000137563/ENSG00000162736/ENSG00000182718/ENSG00000130303/ENSG00000001036/ENSG00000058063/ENSG00000149636/ENSG00000108828/ENSG00000057608/ENSG00000049860/ENSG00000188811/ENSG00000156261/ENSG00000105514/ENSG00000136026/ENSG00000102158/ENSG00000091317/ENSG00000135677/ENSG00000117592…
GO:0042582	CC	GO:0042582	azurophil granule	121	-0.629866	-1.72904	0.000591307	0.0481351	0.0443917	2432	tags=40%, list=14%, signal=35%	ENSG00000135404/ENSG00000153395/ENSG00000196230/ENSG00000169919/ENSG00000118640/ENSG00000103381/ENSG00000064601/ENSG00000137563/ENSG00000162736/ENSG00000182718/ENSG00000130303/ENSG00000001036/ENSG00000058063/ENSG00000149636/ENSG00000108828/ENSG00000057608/ENSG00000049860/ENSG00000188811/ENSG00000156261/ENSG00000105514/ENSG00000136026/ENSG00000102158/ENSG00000091317/ENSG00000135677/ENSG00000117592…
GO:0051987	BP	GO:0051987	positive regulation of attachment of spindle microtubules to kinetochore	11	-0.916565	-1.72658	0.000589777	0.0481351	0.0443917	697	tags=45%, list=4%, signal=44%	ENSG00000178999/ENSG00000134690/ENSG00000149503/ENSG00000134057/ENSG00000089685
GO:0050821	BP	GO:0050821	protein stabilization	185	-0.567331	-1.64167	0.000579159	0.0481351	0.0443917	2015	tags=20%, list=11%, signal=18%	ENSG00000167085/ENSG00000150753/ENSG00000122406/ENSG00000115310/ENSG00000128602/ENSG00000198561/ENSG00000183765/ENSG00000143153/ENSG00000166794/ENSG00000120438/ENSG00000156261/ENSG00000171863/ENSG00000144840/ENSG00000181163/ENSG00000115484/ENSG00000184357/ENSG00000132589/ENSG00000135624/ENSG00000030582/ENSG00000185896/ENSG00000179218/ENSG00000243667/ENSG00000069849/ENSG00000117385/ENSG00000080824…
GO:0006486	BP	GO:0006486	protein glycosylation	189	-0.560416	-1.62478	0.000621075	0.0481351	0.0443917	3347	tags=42%, list=19%, signal=34%	ENSG00000156162/ENSG00000173511/ENSG00000196547/ENSG00000179104/ENSG00000070731/ENSG00000228474/ENSG00000176920/ENSG00000198856/ENSG00000161013/ENSG00000139629/ENSG00000118600/ENSG00000172269/ENSG00000156966/ENSG00000176928/ENSG00000116406/ENSG00000000419/ENSG00000149541/ENSG00000111846/ENSG00000012232/ENSG00000170340/ENSG00000115275/ENSG00000158850/ENSG00000153989/ENSG00000169255/ENSG00000187446…
GO:0043413	BP	GO:0043413	macromolecule glycosylation	189	-0.560416	-1.62478	0.000621075	0.0481351	0.0443917	3347	tags=42%, list=19%, signal=34%	ENSG00000156162/ENSG00000173511/ENSG00000196547/ENSG00000179104/ENSG00000070731/ENSG00000228474/ENSG00000176920/ENSG00000198856/ENSG00000161013/ENSG00000139629/ENSG00000118600/ENSG00000172269/ENSG00000156966/ENSG00000176928/ENSG00000116406/ENSG00000000419/ENSG00000149541/ENSG00000111846/ENSG00000012232/ENSG00000170340/ENSG00000115275/ENSG00000158850/ENSG00000153989/ENSG00000169255/ENSG00000187446…
GO:0030097	BP	GO:0030097	hemopoiesis	705	0.586288	1.6108	0.000596972	0.0481351	0.0443917	1045	tags=10%, list=6%, signal=10%	ENSG00000104856/ENSG00000100867/ENSG00000049249/ENSG00000136826/ENSG00000155090/ENSG00000083799/ENSG00000232810/ENSG00000127528/ENSG00000104432/ENSG00000128917/ENSG00000067082/ENSG00000100906/ENSG00000069399/ENSG00000164400/ENSG00000176907/ENSG00000165030/ENSG00000125845/ENSG00000104951/ENSG00000172216/ENSG00000095752/ENSG00000124766/ENSG00000128342/ENSG00000185507/ENSG00000115604/ENSG00000064932…
GO:0046034	BP	GO:0046034	ATP metabolic process	188	-0.55189	-1.59809	0.000596107	0.0481351	0.0443917	3051	tags=37%, list=17%, signal=31%	ENSG00000185883/ENSG00000212907/ENSG00000167965/ENSG00000159199/ENSG00000147684/ENSG00000065518/ENSG00000102125/ENSG00000140990/ENSG00000166855/ENSG00000184983/ENSG00000158864/ENSG00000004779/ENSG00000142156/ENSG00000138430/ENSG00000125375/ENSG00000171105/ENSG00000158122/ENSG00000198886/ENSG00000156515/ENSG00000117118/ENSG00000173915/ENSG00000134333/ENSG00000125356/ENSG00000168653/ENSG00000067225…
GO:0010639	BP	GO:0010639	negative regulation of organelle organization	312	-0.491366	-1.49998	0.000613139	0.0481351	0.0443917	2123	tags=26%, list=12%, signal=23%	ENSG00000152253/ENSG00000107960/ENSG00000137812/ENSG00000108773/ENSG00000247596/ENSG00000128849/ENSG00000182504/ENSG00000108179/ENSG00000075785/ENSG00000071539/ENSG00000136111/ENSG00000154473/ENSG00000188827/ENSG00000158195/ENSG00000078018/ENSG00000198836/ENSG00000004478/ENSG00000156968/ENSG00000156509/ENSG00000110200/ENSG00000198898/ENSG00000136059/ENSG00000176142/ENSG00000101843/ENSG00000112029…

## Sheet: Supplemental Table 6
	ONTOLOGY	ID	Description	setSize	enrichmentScore	NES	pvalue	p.adjust	qvalue	rank	leading_edge	core_enrichment
GO:0016126	BP	GO:0016126	sterol biosynthetic process	49	-0.850016	-2.20606	3.85763e-09	5.04385e-05	4.73392e-05	1095	tags=45%, list=7%, signal=42%	ENSG00000160752/ENSG00000143815/ENSG00000163344/ENSG00000205808/ENSG00000114650/ENSG00000100003/ENSG00000079459/ENSG00000100243/ENSG00000173409/ENSG00000110921/ENSG00000116133/ENSG00000147155/ENSG00000104549/ENSG00000149809/ENSG00000172893/ENSG00000131473/ENSG00000198911/ENSG00000111684/ENSG00000160179/ENSG00000186480/ENSG00000160285/ENSG00000072310
GO:0006695	BP	GO:0006695	cholesterol biosynthetic process	43	-0.856331	-2.16821	3.94406e-08	0.000140774	0.000132123	1095	tags=49%, list=7%, signal=45%	ENSG00000160752/ENSG00000143815/ENSG00000163344/ENSG00000205808/ENSG00000114650/ENSG00000100003/ENSG00000079459/ENSG00000100243/ENSG00000173409/ENSG00000110921/ENSG00000116133/ENSG00000147155/ENSG00000149809/ENSG00000172893/ENSG00000131473/ENSG00000198911/ENSG00000111684/ENSG00000160179/ENSG00000186480/ENSG00000160285/ENSG00000072310
GO:1902653	BP	GO:1902653	secondary alcohol biosynthetic process	43	-0.856331	-2.16821	3.94406e-08	0.000140774	0.000132123	1095	tags=49%, list=7%, signal=45%	ENSG00000160752/ENSG00000143815/ENSG00000163344/ENSG00000205808/ENSG00000114650/ENSG00000100003/ENSG00000079459/ENSG00000100243/ENSG00000173409/ENSG00000110921/ENSG00000116133/ENSG00000147155/ENSG00000149809/ENSG00000172893/ENSG00000131473/ENSG00000198911/ENSG00000111684/ENSG00000160179/ENSG00000186480/ENSG00000160285/ENSG00000072310
GO:0006066	BP	GO:0006066	alcohol metabolic process	258	-0.572716	-1.88389	4.30665e-08	0.000140774	0.000132123	1095	tags=22%, list=7%, signal=21%	ENSG00000160752/ENSG00000049239/ENSG00000172269/ENSG00000165092/ENSG00000006757/ENSG00000177628/ENSG00000150787/ENSG00000067113/ENSG00000143815/ENSG00000163803/ENSG00000171631/ENSG00000141401/ENSG00000131748/ENSG00000145725/ENSG00000163344/ENSG00000184254/ENSG00000205808/ENSG00000184207/ENSG00000114650/ENSG00000141934/ENSG00000100003/ENSG00000128039/ENSG00000079459/ENSG00000025423/ENSG00000151632…
GO:0006119	BP	GO:0006119	oxidative phosphorylation	133	-0.679075	-2.07257	6.18946e-08	0.000161854	0.000151909	2589	tags=46%, list=17%, signal=38%	ENSG00000126267/ENSG00000178127/ENSG00000169021/ENSG00000189043/ENSG00000165629/ENSG00000169020/ENSG00000174886/ENSG00000184752/ENSG00000165280/ENSG00000073578/ENSG00000116288/ENSG00000168275/ENSG00000137288/ENSG00000166575/ENSG00000156467/ENSG00000131143/ENSG00000103254/ENSG00000140740/ENSG00000233954/ENSG00000154723/ENSG00000010256/ENSG00000147123/ENSG00000241468/ENSG00000111775/ENSG00000125356…
GO:0070469	CC	GO:0070469	respirasome	94	-0.719357	-2.08832	1.6817e-07	0.000366471	0.000343952	2767	tags=52%, list=18%, signal=43%	ENSG00000204370/ENSG00000101084/ENSG00000140990/ENSG00000151366/ENSG00000126267/ENSG00000178127/ENSG00000169021/ENSG00000189043/ENSG00000174109/ENSG00000174886/ENSG00000184752/ENSG00000073578/ENSG00000168275/ENSG00000156467/ENSG00000131143/ENSG00000140740/ENSG00000233954/ENSG00000010256/ENSG00000147123/ENSG00000137038/ENSG00000111775/ENSG00000125356/ENSG00000183648/ENSG00000065518/ENSG00000164405…
GO:0009060	BP	GO:0009060	aerobic respiration	177	-0.625331	-2.01085	2.1143e-07	0.00039492	0.000370654	3159	tags=48%, list=21%, signal=38%	ENSG00000135940/ENSG00000091140/ENSG00000067829/ENSG00000110955/ENSG00000122729/ENSG00000099624/ENSG00000134056/ENSG00000109390/ENSG00000091483/ENSG00000176410/ENSG00000204370/ENSG00000140990/ENSG00000151366/ENSG00000146701/ENSG00000126267/ENSG00000178127/ENSG00000169021/ENSG00000189043/ENSG00000100412/ENSG00000165629/ENSG00000169020/ENSG00000174886/ENSG00000176171/ENSG00000184752/ENSG00000117640…
GO:0098803	CC	GO:0098803	respiratory chain complex	83	-0.739185	-2.10284	3.99778e-07	0.000653386	0.000613238	2767	tags=55%, list=18%, signal=45%	ENSG00000105341/ENSG00000204370/ENSG00000140990/ENSG00000151366/ENSG00000126267/ENSG00000178127/ENSG00000169021/ENSG00000189043/ENSG00000174886/ENSG00000184752/ENSG00000073578/ENSG00000168275/ENSG00000156467/ENSG00000131143/ENSG00000140740/ENSG00000233954/ENSG00000010256/ENSG00000147123/ENSG00000137038/ENSG00000111775/ENSG00000125356/ENSG00000183648/ENSG00000065518/ENSG00000164405/ENSG00000165264…
GO:0042773	BP	GO:0042773	ATP synthesis coupled electron transport	91	-0.707253	-2.04569	8.30003e-07	0.000907873	0.000852087	2767	tags=51%, list=18%, signal=41%	ENSG00000204370/ENSG00000140990/ENSG00000151366/ENSG00000126267/ENSG00000178127/ENSG00000169021/ENSG00000189043/ENSG00000184752/ENSG00000073578/ENSG00000116288/ENSG00000168275/ENSG00000156467/ENSG00000131143/ENSG00000140740/ENSG00000233954/ENSG00000010256/ENSG00000111775/ENSG00000125356/ENSG00000183648/ENSG00000065518/ENSG00000170312/ENSG00000164405/ENSG00000165264/ENSG00000158828/ENSG00000119013…
GO:0042775	BP	GO:0042775	mitochondrial ATP synthesis coupled electron transport	91	-0.707253	-2.04569	8.30003e-07	0.000907873	0.000852087	2767	tags=51%, list=18%, signal=41%	ENSG00000204370/ENSG00000140990/ENSG00000151366/ENSG00000126267/ENSG00000178127/ENSG00000169021/ENSG00000189043/ENSG00000184752/ENSG00000073578/ENSG00000116288/ENSG00000168275/ENSG00000156467/ENSG00000131143/ENSG00000140740/ENSG00000233954/ENSG00000010256/ENSG00000111775/ENSG00000125356/ENSG00000183648/ENSG00000065518/ENSG00000170312/ENSG00000164405/ENSG00000165264/ENSG00000158828/ENSG00000119013…
GO:0015399	MF	GO:0015399	primary active transmembrane transporter activity	132	-0.650475	-1.9775	8.33229e-07	0.000907873	0.000852087	1770	tags=34%, list=12%, signal=30%	ENSG00000114573/ENSG00000010256/ENSG00000107331/ENSG00000114770/ENSG00000125356/ENSG00000159720/ENSG00000183648/ENSG00000065518/ENSG00000165264/ENSG00000185883/ENSG00000117528/ENSG00000074370/ENSG00000117410/ENSG00000119013/ENSG00000197150/ENSG00000099795/ENSG00000187527/ENSG00000176340/ENSG00000033627/ENSG00000173660/ENSG00000198712/ENSG00000178741/ENSG00000167792/ENSG00000158864/ENSG00000159363…
GO:0060205	CC	GO:0060205	cytoplasmic vesicle lumen	227	-0.558469	-1.83771	6.73063e-07	0.000907873	0.000852087	1474	tags=21%, list=10%, signal=19%	ENSG00000108679/ENSG00000148218/ENSG00000145882/ENSG00000196419/ENSG00000148334/ENSG00000198805/ENSG00000136279/ENSG00000156508/ENSG00000012779/ENSG00000196743/ENSG00000103811/ENSG00000160209/ENSG00000243678/ENSG00000175899/ENSG00000026297/ENSG00000084207/ENSG00000163191/ENSG00000105220/ENSG00000198931/ENSG00000239264/ENSG00000100299/ENSG00000148180/ENSG00000173511/ENSG00000102837/ENSG00000141959…
GO:0005746	CC	GO:0005746	mitochondrial respirasome	87	-0.727834	-2.10978	1.2478e-06	0.00116535	0.00109375	2767	tags=53%, list=18%, signal=43%	ENSG00000204370/ENSG00000101084/ENSG00000140990/ENSG00000151366/ENSG00000126267/ENSG00000178127/ENSG00000169021/ENSG00000189043/ENSG00000174886/ENSG00000184752/ENSG00000073578/ENSG00000156467/ENSG00000131143/ENSG00000140740/ENSG00000233954/ENSG00000010256/ENSG00000147123/ENSG00000137038/ENSG00000111775/ENSG00000125356/ENSG00000183648/ENSG00000065518/ENSG00000164405/ENSG00000165264/ENSG00000119013…
GO:0098800	CC	GO:0098800	inner mitochondrial membrane protein complex	150	-0.625588	-1.90233	1.24671e-06	0.00116535	0.00109375	2589	tags=43%, list=17%, signal=36%	ENSG00000126267/ENSG00000178127/ENSG00000169021/ENSG00000189043/ENSG00000165629/ENSG00000169020/ENSG00000174886/ENSG00000135390/ENSG00000184752/ENSG00000073578/ENSG00000156467/ENSG00000131143/ENSG00000184831/ENSG00000140740/ENSG00000233954/ENSG00000154723/ENSG00000010256/ENSG00000147123/ENSG00000154518/ENSG00000241468/ENSG00000137038/ENSG00000111775/ENSG00000125356/ENSG00000183648/ENSG00000065518…
GO:0009201	BP	GO:0009201	ribonucleoside triphosphate biosynthetic process	106	-0.676582	-1.99984	1.39182e-06	0.0012132	0.00113865	2919	tags=50%, list=19%, signal=41%	ENSG00000109390/ENSG00000176410/ENSG00000204370/ENSG00000140990/ENSG00000107798/ENSG00000151366/ENSG00000205542/ENSG00000178127/ENSG00000165629/ENSG00000169020/ENSG00000174886/ENSG00000135390/ENSG00000184752/ENSG00000047230/ENSG00000165280/ENSG00000073578/ENSG00000178035/ENSG00000103254/ENSG00000103024/ENSG00000149925/ENSG00000114573/ENSG00000154723/ENSG00000147123/ENSG00000154518/ENSG00000241468…
GO:0046165	BP	GO:0046165	alcohol biosynthetic process	97	-0.709977	-2.06469	1.67567e-06	0.00121719	0.00114239	1095	tags=32%, list=7%, signal=30%	ENSG00000160752/ENSG00000049239/ENSG00000177628/ENSG00000150787/ENSG00000143815/ENSG00000171631/ENSG00000141401/ENSG00000145725/ENSG00000163344/ENSG00000205808/ENSG00000184207/ENSG00000114650/ENSG00000100003/ENSG00000128039/ENSG00000079459/ENSG00000100243/ENSG00000173409/ENSG00000110921/ENSG00000116133/ENSG00000147155/ENSG00000228716/ENSG00000149809/ENSG00000112175/ENSG00000172893/ENSG00000131473…
GO:0022904	BP	GO:0022904	respiratory electron transport chain	110	-0.675516	-2.01648	1.50511e-06	0.00121719	0.00114239	2767	tags=45%, list=18%, signal=37%	ENSG00000204370/ENSG00000140990/ENSG00000151366/ENSG00000171503/ENSG00000126267/ENSG00000178127/ENSG00000169021/ENSG00000189043/ENSG00000105379/ENSG00000184752/ENSG00000073578/ENSG00000116288/ENSG00000168275/ENSG00000156467/ENSG00000131143/ENSG00000140740/ENSG00000233954/ENSG00000010256/ENSG00000111775/ENSG00000125356/ENSG00000183648/ENSG00000065518/ENSG00000170312/ENSG00000164405/ENSG00000165264…
GO:0034774	CC	GO:0034774	secretory granule lumen	225	-0.559831	-1.84153	1.63693e-06	0.00121719	0.00114239	1474	tags=21%, list=10%, signal=19%	ENSG00000108679/ENSG00000148218/ENSG00000145882/ENSG00000196419/ENSG00000148334/ENSG00000198805/ENSG00000136279/ENSG00000156508/ENSG00000012779/ENSG00000196743/ENSG00000103811/ENSG00000160209/ENSG00000243678/ENSG00000175899/ENSG00000026297/ENSG00000084207/ENSG00000163191/ENSG00000105220/ENSG00000198931/ENSG00000239264/ENSG00000100299/ENSG00000148180/ENSG00000173511/ENSG00000102837/ENSG00000141959…
GO:0003735	MF	GO:0003735	structural constituent of ribosome	153	-0.612209	-1.88049	1.82957e-06	0.00125903	0.00118167	3412	tags=52%, list=23%, signal=40%	ENSG00000182180/ENSG00000062582/ENSG00000163682/ENSG00000068784/ENSG00000108826/ENSG00000163319/ENSG00000182154/ENSG00000266472/ENSG00000172172/ENSG00000171421/ENSG00000149806/ENSG00000136942/ENSG00000161016/ENSG00000112651/ENSG00000137547/ENSG00000241343/ENSG00000089009/ENSG00000063177/ENSG00000197728/ENSG00000171863/ENSG00000177600/ENSG00000146223/ENSG00000130255/ENSG00000115364/ENSG00000142534…
GO:0009142	BP	GO:0009142	nucleoside triphosphate biosynthetic process	114	-0.667166	-2.01062	2.72836e-06	0.00178367	0.00167406	2919	tags=49%, list=19%, signal=40%	ENSG00000109390/ENSG00000176410/ENSG00000176890/ENSG00000204370/ENSG00000140990/ENSG00000107798/ENSG00000151366/ENSG00000205542/ENSG00000178127/ENSG00000165629/ENSG00000169020/ENSG00000174886/ENSG00000135390/ENSG00000184752/ENSG00000047230/ENSG00000165280/ENSG00000073578/ENSG00000178035/ENSG00000103254/ENSG00000103024/ENSG00000149925/ENSG00000114573/ENSG00000154723/ENSG00000147123/ENSG00000154518…
GO:0019646	BP	GO:0019646	aerobic electron transport chain	83	-0.706014	-2.00848	4.92283e-06	0.00292573	0.00274595	2767	tags=51%, list=18%, signal=41%	ENSG00000204370/ENSG00000140990/ENSG00000151366/ENSG00000126267/ENSG00000178127/ENSG00000169021/ENSG00000189043/ENSG00000073578/ENSG00000116288/ENSG00000156467/ENSG00000131143/ENSG00000140740/ENSG00000233954/ENSG00000010256/ENSG00000111775/ENSG00000125356/ENSG00000183648/ENSG00000065518/ENSG00000164405/ENSG00000165264/ENSG00000158828/ENSG00000119013/ENSG00000099795/ENSG00000176340/ENSG00000127184…
GO:1902600	BP	GO:1902600	proton transmembrane transport	118	-0.65049	-1.94702	4.81844e-06	0.00292573	0.00274595	2016	tags=30%, list=13%, signal=26%	ENSG00000131143/ENSG00000103254/ENSG00000127419/ENSG00000114573/ENSG00000154723/ENSG00000182220/ENSG00000010256/ENSG00000154518/ENSG00000241468/ENSG00000159720/ENSG00000071553/ENSG00000185883/ENSG00000151729/ENSG00000117410/ENSG00000168924/ENSG00000152234/ENSG00000176340/ENSG00000033627/ENSG00000173660/ENSG00000228253/ENSG00000198712/ENSG00000178741/ENSG00000110719/ENSG00000124172/ENSG00000163399…
GO:0030141	CC	GO:0030141	secretory granule	564	-0.423862	-1.48737	6.05979e-06	0.00344486	0.00323318	1864	tags=21%, list=12%, signal=19%	ENSG00000076944/ENSG00000104518/ENSG00000185896/ENSG00000181467/ENSG00000149925/ENSG00000164062/ENSG00000067225/ENSG00000101160/ENSG00000114573/ENSG00000167711/ENSG00000149357/ENSG00000182220/ENSG00000196230/ENSG00000180370/ENSG00000167964/ENSG00000197746/ENSG00000104763/ENSG00000101152/ENSG00000119705/ENSG00000085063/ENSG00000179044/ENSG00000084234/ENSG00000145740/ENSG00000108679/ENSG00000148218…
GO:0031983	CC	GO:0031983	vesicle lumen	228	-0.545523	-1.79222	6.64578e-06	0.00362057	0.00339809	1474	tags=21%, list=10%, signal=19%	ENSG00000108679/ENSG00000148218/ENSG00000145882/ENSG00000196419/ENSG00000148334/ENSG00000198805/ENSG00000136279/ENSG00000156508/ENSG00000012779/ENSG00000196743/ENSG00000103811/ENSG00000160209/ENSG00000243678/ENSG00000175899/ENSG00000026297/ENSG00000084207/ENSG00000163191/ENSG00000105220/ENSG00000198931/ENSG00000239264/ENSG00000100299/ENSG00000148180/ENSG00000173511/ENSG00000102837/ENSG00000141959…
GO:0009152	BP	GO:0009152	purine ribonucleotide biosynthetic process	178	-0.578712	-1.85667	8.48709e-06	0.00443875	0.004166	2771	tags=42%, list=19%, signal=34%	ENSG00000075239/ENSG00000204370/ENSG00000140990/ENSG00000118402/ENSG00000107798/ENSG00000151366/ENSG00000205542/ENSG00000178127/ENSG00000165629/ENSG00000169020/ENSG00000068120/ENSG00000174886/ENSG00000135390/ENSG00000184752/ENSG00000165280/ENSG00000070019/ENSG00000073578/ENSG00000178035/ENSG00000105607/ENSG00000165996/ENSG00000278540/ENSG00000138031/ENSG00000067992/ENSG00000103254/ENSG00000103024…
GO:0009145	BP	GO:0009145	purine nucleoside triphosphate biosynthetic process	101	-0.668358	-1.96223	9.93525e-06	0.00481124	0.0045156	2919	tags=50%, list=19%, signal=41%	ENSG00000109390/ENSG00000176410/ENSG00000204370/ENSG00000140990/ENSG00000107798/ENSG00000151366/ENSG00000205542/ENSG00000178127/ENSG00000165629/ENSG00000169020/ENSG00000174886/ENSG00000135390/ENSG00000184752/ENSG00000165280/ENSG00000073578/ENSG00000178035/ENSG00000103254/ENSG00000103024/ENSG00000149925/ENSG00000114573/ENSG00000154723/ENSG00000147123/ENSG00000154518/ENSG00000241468/ENSG00000125356…
GO:0072522	BP	GO:0072522	purine-containing compound biosynthetic process	213	-0.53551	-1.74172	9.88265e-06	0.00481124	0.0045156	2873	tags=39%, list=19%, signal=32%	ENSG00000124212/ENSG00000176410/ENSG00000152620/ENSG00000075239/ENSG00000204370/ENSG00000140990/ENSG00000118402/ENSG00000107798/ENSG00000151366/ENSG00000115919/ENSG00000205542/ENSG00000178127/ENSG00000165629/ENSG00000169020/ENSG00000068120/ENSG00000174886/ENSG00000135390/ENSG00000184752/ENSG00000101911/ENSG00000165280/ENSG00000070019/ENSG00000073578/ENSG00000178035/ENSG00000105607/ENSG00000176974…
GO:0055070	BP	GO:0055070	copper ion homeostasis	18	-0.904424	-1.9527	1.1592e-05	0.00541303	0.00508041	322	tags=22%, list=2%, signal=22%	ENSG00000156381/ENSG00000177556/ENSG00000142192/ENSG00000125148
GO:0046390	BP	GO:0046390	ribose phosphate biosynthetic process	198	-0.556447	-1.78533	1.20294e-05	0.0054236	0.00509033	2771	tags=39%, list=19%, signal=33%	ENSG00000075239/ENSG00000204370/ENSG00000140990/ENSG00000118402/ENSG00000107798/ENSG00000151366/ENSG00000205542/ENSG00000178127/ENSG00000165629/ENSG00000169020/ENSG00000068120/ENSG00000174886/ENSG00000135390/ENSG00000184752/ENSG00000101911/ENSG00000047230/ENSG00000165280/ENSG00000070019/ENSG00000073578/ENSG00000178035/ENSG00000105607/ENSG00000165996/ENSG00000278540/ENSG00000138031/ENSG00000067992…
GO:0009206	BP	GO:0009206	purine ribonucleoside triphosphate biosynthetic process	100	-0.675614	-1.98495	1.34846e-05	0.00572472	0.00537295	2919	tags=51%, list=19%, signal=41%	ENSG00000109390/ENSG00000176410/ENSG00000204370/ENSG00000140990/ENSG00000107798/ENSG00000151366/ENSG00000205542/ENSG00000178127/ENSG00000165629/ENSG00000169020/ENSG00000174886/ENSG00000135390/ENSG00000184752/ENSG00000165280/ENSG00000073578/ENSG00000178035/ENSG00000103254/ENSG00000103024/ENSG00000149925/ENSG00000114573/ENSG00000154723/ENSG00000147123/ENSG00000154518/ENSG00000241468/ENSG00000125356…
GO:0009260	BP	GO:0009260	ribonucleotide biosynthetic process	192	-0.564088	-1.80821	1.39407e-05	0.00572472	0.00537295	2771	tags=40%, list=19%, signal=33%	ENSG00000075239/ENSG00000204370/ENSG00000140990/ENSG00000118402/ENSG00000107798/ENSG00000151366/ENSG00000205542/ENSG00000178127/ENSG00000165629/ENSG00000169020/ENSG00000068120/ENSG00000174886/ENSG00000135390/ENSG00000184752/ENSG00000047230/ENSG00000165280/ENSG00000070019/ENSG00000073578/ENSG00000178035/ENSG00000105607/ENSG00000165996/ENSG00000278540/ENSG00000138031/ENSG00000067992/ENSG00000103254…
GO:0045218	BP	GO:0045218	zonula adherens maintenance	3	0.999342	1.50296	1.40108e-05	0.00572472	0.00537295	7	tags=33%, list=0%, signal=33%	ENSG00000140859
GO:0015986	BP	GO:0015986	proton motive force-driven ATP synthesis	73	-0.708601	-1.97705	1.86302e-05	0.00738151	0.00692794	3462	tags=66%, list=23%, signal=51%	ENSG00000167283/ENSG00000198695/ENSG00000143252/ENSG00000198763/ENSG00000110717/ENSG00000116459/ENSG00000090266/ENSG00000110955/ENSG00000099624/ENSG00000109390/ENSG00000176410/ENSG00000204370/ENSG00000140990/ENSG00000151366/ENSG00000178127/ENSG00000165629/ENSG00000169020/ENSG00000174886/ENSG00000135390/ENSG00000184752/ENSG00000073578/ENSG00000103254/ENSG00000114573/ENSG00000154723/ENSG00000147123…
GO:1904813	CC	GO:1904813	ficolin-1-rich granule lumen	110	-0.63994	-1.91029	2.02959e-05	0.00758696	0.00712077	2347	tags=34%, list=16%, signal=29%	ENSG00000167658/ENSG00000171314/ENSG00000204388/ENSG00000165280/ENSG00000178035/ENSG00000165916/ENSG00000140319/ENSG00000104518/ENSG00000149925/ENSG00000164062/ENSG00000067225/ENSG00000101160/ENSG00000104763/ENSG00000148218/ENSG00000196419/ENSG00000198805/ENSG00000136279/ENSG00000156508/ENSG00000012779/ENSG00000103811/ENSG00000243678/ENSG00000084207/ENSG00000105220/ENSG00000204389/ENSG00000148180…
GO:0006164	BP	GO:0006164	purine nucleotide biosynthetic process	207	-0.551226	-1.78897	2.03093e-05	0.00758696	0.00712077	2873	tags=40%, list=19%, signal=32%	ENSG00000124212/ENSG00000176410/ENSG00000152620/ENSG00000075239/ENSG00000204370/ENSG00000140990/ENSG00000118402/ENSG00000107798/ENSG00000151366/ENSG00000115919/ENSG00000205542/ENSG00000178127/ENSG00000165629/ENSG00000169020/ENSG00000068120/ENSG00000174886/ENSG00000135390/ENSG00000184752/ENSG00000101911/ENSG00000165280/ENSG00000070019/ENSG00000073578/ENSG00000178035/ENSG00000105607/ENSG00000165996…
GO:0006754	BP	GO:0006754	ATP biosynthetic process	92	-0.673679	-1.94369	2.20501e-05	0.00800847	0.00751637	3092	tags=53%, list=21%, signal=43%	ENSG00000110955/ENSG00000099624/ENSG00000109390/ENSG00000176410/ENSG00000204370/ENSG00000140990/ENSG00000107798/ENSG00000151366/ENSG00000205542/ENSG00000178127/ENSG00000165629/ENSG00000169020/ENSG00000174886/ENSG00000135390/ENSG00000184752/ENSG00000165280/ENSG00000073578/ENSG00000103254/ENSG00000149925/ENSG00000114573/ENSG00000154723/ENSG00000147123/ENSG00000154518/ENSG00000241468/ENSG00000125356…
GO:0008203	BP	GO:0008203	cholesterol metabolic process	94	-0.653935	-1.8984	2.37301e-05	0.00838571	0.00787043	1012	tags=32%, list=7%, signal=30%	ENSG00000160752/ENSG00000177628/ENSG00000143815/ENSG00000131748/ENSG00000163344/ENSG00000205808/ENSG00000114650/ENSG00000100003/ENSG00000079459/ENSG00000100243/ENSG00000173409/ENSG00000110921/ENSG00000182704/ENSG00000070610/ENSG00000116133/ENSG00000147155/ENSG00000104549/ENSG00000130164/ENSG00000149809/ENSG00000142192/ENSG00000172893/ENSG00000131473/ENSG00000198911/ENSG00000111684/ENSG00000160179…
GO:0015078	MF	GO:0015078	proton transmembrane transporter activity	105	-0.642249	-1.89832	2.51815e-05	0.00866441	0.00813201	1770	tags=27%, list=12%, signal=24%	ENSG00000114573/ENSG00000154723/ENSG00000010256/ENSG00000154518/ENSG00000241468/ENSG00000159720/ENSG00000185883/ENSG00000151729/ENSG00000117410/ENSG00000168924/ENSG00000152234/ENSG00000176340/ENSG00000033627/ENSG00000173660/ENSG00000228253/ENSG00000198712/ENSG00000178741/ENSG00000188338/ENSG00000110719/ENSG00000124172/ENSG00000171130/ENSG00000198727/ENSG00000198899/ENSG00000131174/ENSG00000198938…
GO:0015453	MF	GO:0015453	oxidoreduction-driven active transmembrane transporter activity	64	-0.7234	-1.94472	3.10776e-05	0.010419	0.00977874	2732	tags=48%, list=18%, signal=40%	ENSG00000140990/ENSG00000151366/ENSG00000162144/ENSG00000126267/ENSG00000178127/ENSG00000169021/ENSG00000189043/ENSG00000184752/ENSG00000131143/ENSG00000010256/ENSG00000125356/ENSG00000183648/ENSG00000065518/ENSG00000165264/ENSG00000119013/ENSG00000099795/ENSG00000176340/ENSG00000173660/ENSG00000198712/ENSG00000178741/ENSG00000167792/ENSG00000158864/ENSG00000198888/ENSG00000198727/ENSG00000168653…
GO:0070542	BP	GO:0070542	response to fatty acid	35	-0.814768	-1.98802	3.47696e-05	0.0110881	0.0104068	545	tags=20%, list=4%, signal=19%	ENSG00000151632/ENSG00000125398/ENSG00000130164/ENSG00000151726/ENSG00000187134/ENSG00000099194/ENSG00000072310
GO:1902652	BP	GO:1902652	secondary alcohol metabolic process	102	-0.651388	-1.92297	3.40156e-05	0.0110881	0.0104068	1012	tags=30%, list=7%, signal=29%	ENSG00000160752/ENSG00000177628/ENSG00000143815/ENSG00000131748/ENSG00000163344/ENSG00000205808/ENSG00000114650/ENSG00000100003/ENSG00000079459/ENSG00000100243/ENSG00000173409/ENSG00000110921/ENSG00000182704/ENSG00000070610/ENSG00000116133/ENSG00000147155/ENSG00000182054/ENSG00000104549/ENSG00000130164/ENSG00000149809/ENSG00000142192/ENSG00000172893/ENSG00000131473/ENSG00000198911/ENSG00000111684…
GO:0034198	BP	GO:0034198	cellular response to amino acid starvation	48	0.925383	1.86793	3.62213e-05	0.011276	0.0105832	221	tags=6%, list=1%, signal=6%	ENSG00000162772/ENSG00000130766/ENSG00000112561
GO:0016491	MF	GO:0016491	oxidoreductase activity	526	-0.4179	-1.49505	3.83528e-05	0.0116619	0.0109453	1704	tags=23%, list=11%, signal=21%	ENSG00000204228/ENSG00000186160/ENSG00000095321/ENSG00000160211/ENSG00000165475/ENSG00000269858/ENSG00000159692/ENSG00000111775/ENSG00000053371/ENSG00000125356/ENSG00000052802/ENSG00000183648/ENSG00000065518/ENSG00000130347/ENSG00000162365/ENSG00000145882/ENSG00000182551/ENSG00000176387/ENSG00000125652/ENSG00000135596/ENSG00000148334/ENSG00000143224/ENSG00000014641/ENSG00000203797/ENSG00000215883…
GO:0090181	BP	GO:0090181	regulation of cholesterol metabolic process	23	-0.87655	-2.00057	4.03172e-05	0.0117144	0.0109946	722	tags=35%, list=5%, signal=33%	ENSG00000114650/ENSG00000100003/ENSG00000173409/ENSG00000130164/ENSG00000198911/ENSG00000111684/ENSG00000160179/ENSG00000072310
GO:1901293	BP	GO:1901293	nucleoside phosphate biosynthetic process	245	-0.506017	-1.65973	4.02513e-05	0.0117144	0.0109946	2873	tags=37%, list=19%, signal=30%	ENSG00000124212/ENSG00000176410/ENSG00000152620/ENSG00000176890/ENSG00000075239/ENSG00000204370/ENSG00000140990/ENSG00000118402/ENSG00000107798/ENSG00000151366/ENSG00000115919/ENSG00000205542/ENSG00000178127/ENSG00000165629/ENSG00000169020/ENSG00000068120/ENSG00000174886/ENSG00000135390/ENSG00000184752/ENSG00000101911/ENSG00000047230/ENSG00000165280/ENSG00000070019/ENSG00000073578/ENSG00000178035…
GO:0016125	BP	GO:0016125	sterol metabolic process	104	-0.643299	-1.90032	5.37718e-05	0.0149588	0.0140397	1012	tags=29%, list=7%, signal=27%	ENSG00000160752/ENSG00000177628/ENSG00000143815/ENSG00000131748/ENSG00000163344/ENSG00000205808/ENSG00000114650/ENSG00000100003/ENSG00000079459/ENSG00000100243/ENSG00000173409/ENSG00000110921/ENSG00000182704/ENSG00000070610/ENSG00000116133/ENSG00000147155/ENSG00000104549/ENSG00000130164/ENSG00000149809/ENSG00000142192/ENSG00000172893/ENSG00000131473/ENSG00000198911/ENSG00000111684/ENSG00000160179…
GO:0000122	BP	GO:0000122	negative regulation of transcription by RNA polymerase II	687	0.718965	1.63257	5.34663e-05	0.0149588	0.0140397	1265	tags=15%, list=8%, signal=15%	ENSG00000162772/ENSG00000126368/ENSG00000116717/ENSG00000129474/ENSG00000057657/ENSG00000185022/ENSG00000101255/ENSG00000123095/ENSG00000155090/ENSG00000112182/ENSG00000136826/ENSG00000179094/ENSG00000175197/ENSG00000187098/ENSG00000069869/ENSG00000141448/ENSG00000172201/ENSG00000115641/ENSG00000113580/ENSG00000244405/ENSG00000174738/ENSG00000181472/ENSG00000109320/ENSG00000132326/ENSG00000048052…
GO:0006873	BP	GO:0006873	intracellular monoatomic ion homeostasis	328	-0.46096	-1.55943	5.98591e-05	0.0163054	0.0153035	1937	tags=21%, list=13%, signal=19%	ENSG00000143162/ENSG00000127419/ENSG00000198668/ENSG00000050438/ENSG00000091513/ENSG00000074621/ENSG00000185896/ENSG00000165915/ENSG00000114573/ENSG00000085872/ENSG00000182220/ENSG00000102882/ENSG00000159720/ENSG00000088832/ENSG00000071553/ENSG00000145740/ENSG00000106460/ENSG00000005059/ENSG00000182512/ENSG00000070729/ENSG00000183172/ENSG00000180694/ENSG00000160183/ENSG00000165060/ENSG00000069849…
GO:0045333	BP	GO:0045333	cellular respiration	216	-0.51264	-1.66747	6.18933e-05	0.0165154	0.0155006	2674	tags=37%, list=18%, signal=31%	ENSG00000151366/ENSG00000146701/ENSG00000171503/ENSG00000126267/ENSG00000178127/ENSG00000169021/ENSG00000189043/ENSG00000100412/ENSG00000165629/ENSG00000169020/ENSG00000174886/ENSG00000105379/ENSG00000176171/ENSG00000203668/ENSG00000184752/ENSG00000117640/ENSG00000165280/ENSG00000073578/ENSG00000116288/ENSG00000168275/ENSG00000137288/ENSG00000166575/ENSG00000156467/ENSG00000131143/ENSG00000103254…
GO:0044391	CC	GO:0044391	ribosomal subunit	183	-0.542568	-1.75891	6.5712e-05	0.0171837	0.0161278	3412	tags=46%, list=23%, signal=36%	ENSG00000182180/ENSG00000062582/ENSG00000163682/ENSG00000108826/ENSG00000163319/ENSG00000182154/ENSG00000266472/ENSG00000172172/ENSG00000171421/ENSG00000149806/ENSG00000136942/ENSG00000161016/ENSG00000112651/ENSG00000137547/ENSG00000232119/ENSG00000241343/ENSG00000089009/ENSG00000063177/ENSG00000197728/ENSG00000171863/ENSG00000177600/ENSG00000146223/ENSG00000130255/ENSG00000115364/ENSG00000175756…
GO:0009165	BP	GO:0009165	nucleotide biosynthetic process	243	-0.50779	-1.66268	7.06804e-05	0.0181205	0.0170071	2873	tags=37%, list=19%, signal=30%	ENSG00000124212/ENSG00000176410/ENSG00000152620/ENSG00000176890/ENSG00000075239/ENSG00000204370/ENSG00000140990/ENSG00000118402/ENSG00000107798/ENSG00000151366/ENSG00000115919/ENSG00000205542/ENSG00000178127/ENSG00000165629/ENSG00000169020/ENSG00000068120/ENSG00000174886/ENSG00000135390/ENSG00000184752/ENSG00000101911/ENSG00000047230/ENSG00000165280/ENSG00000070019/ENSG00000073578/ENSG00000178035…
GO:0006878	BP	GO:0006878	intracellular copper ion homeostasis	15	-0.912679	-1.93498	7.45e-05	0.0187325	0.0175814	322	tags=27%, list=2%, signal=26%	ENSG00000156381/ENSG00000177556/ENSG00000142192/ENSG00000125148
GO:0050786	MF	GO:0050786	RAGE receptor binding	8	-0.959288	-1.80782	7.99948e-05	0.0197346	0.0185219	316	tags=50%, list=2%, signal=49%	ENSG00000196154/ENSG00000163220/ENSG00000143546/ENSG00000143556
GO:0015988	BP	GO:0015988	energy coupled proton transmembrane transport, against electrochemical gradient	5	-0.978856	-1.68555	8.54413e-05	0.0203117	0.0190636	212	tags=80%, list=1%, signal=79%	ENSG00000198727/ENSG00000198786/ENSG00000198886/ENSG00000198804
GO:0015990	BP	GO:0015990	electron transport coupled proton transport	5	-0.978856	-1.68555	8.54413e-05	0.0203117	0.0190636	212	tags=80%, list=1%, signal=79%	ENSG00000198727/ENSG00000198786/ENSG00000198886/ENSG00000198804
GO:0030003	BP	GO:0030003	intracellular monoatomic cation homeostasis	323	-0.46051	-1.55843	8.80017e-05	0.0205468	0.0192843	1937	tags=21%, list=13%, signal=19%	ENSG00000143162/ENSG00000127419/ENSG00000198668/ENSG00000050438/ENSG00000091513/ENSG00000074621/ENSG00000185896/ENSG00000165915/ENSG00000114573/ENSG00000085872/ENSG00000182220/ENSG00000102882/ENSG00000159720/ENSG00000088832/ENSG00000071553/ENSG00000145740/ENSG00000106460/ENSG00000005059/ENSG00000182512/ENSG00000070729/ENSG00000183172/ENSG00000180694/ENSG00000160183/ENSG00000165060/ENSG00000069849…
GO:0042776	BP	GO:0042776	proton motive force-driven mitochondrial ATP synthesis	65	-0.706377	-1.89988	9.38065e-05	0.0211469	0.0198475	3712	tags=65%, list=25%, signal=49%	ENSG00000167283/ENSG00000198695/ENSG00000143252/ENSG00000198763/ENSG00000110717/ENSG00000116459/ENSG00000090266/ENSG00000110955/ENSG00000099624/ENSG00000109390/ENSG00000176410/ENSG00000204370/ENSG00000140990/ENSG00000151366/ENSG00000178127/ENSG00000165629/ENSG00000169020/ENSG00000174886/ENSG00000184752/ENSG00000073578/ENSG00000103254/ENSG00000154723/ENSG00000147123/ENSG00000241468/ENSG00000125356…
GO:0101002	CC	GO:0101002	ficolin-1-rich granule	147	-0.555052	-1.69687	9.32708e-05	0.0211469	0.0198475	2347	tags=33%, list=16%, signal=28%	ENSG00000167658/ENSG00000103544/ENSG00000171314/ENSG00000204388/ENSG00000165280/ENSG00000178035/ENSG00000165916/ENSG00000140319/ENSG00000146094/ENSG00000104518/ENSG00000185896/ENSG00000149925/ENSG00000164062/ENSG00000067225/ENSG00000101160/ENSG00000149357/ENSG00000182220/ENSG00000104763/ENSG00000148218/ENSG00000196419/ENSG00000198805/ENSG00000136279/ENSG00000156508/ENSG00000012779/ENSG00000103811…
GO:0098798	CC	GO:0098798	mitochondrial protein-containing complex	288	-0.482312	-1.57539	9.85739e-05	0.021845	0.0205027	3286	tags=39%, list=22%, signal=31%	ENSG00000108826/ENSG00000116459/ENSG00000163319/ENSG00000182154/ENSG00000266472/ENSG00000172172/ENSG00000006530/ENSG00000090266/ENSG00000171421/ENSG00000105197/ENSG00000135940/ENSG00000091140/ENSG00000112651/ENSG00000067829/ENSG00000110955/ENSG00000137547/ENSG00000099624/ENSG00000103507/ENSG00000134056/ENSG00000109390/ENSG00000105341/ENSG00000150779/ENSG00000204370/ENSG00000140990/ENSG00000151366…
GO:1990204	CC	GO:1990204	oxidoreductase complex	110	-0.613781	-1.8322	0.00012855	0.0280131	0.0262918	3141	tags=45%, list=21%, signal=35%	ENSG00000091140/ENSG00000167588/ENSG00000067829/ENSG00000103507/ENSG00000134056/ENSG00000109390/ENSG00000105341/ENSG00000204370/ENSG00000140990/ENSG00000151366/ENSG00000178127/ENSG00000169021/ENSG00000189043/ENSG00000174886/ENSG00000184752/ENSG00000073578/ENSG00000171848/ENSG00000156467/ENSG00000140740/ENSG00000233954/ENSG00000010256/ENSG00000147123/ENSG00000204228/ENSG00000140905/ENSG00000137038…
GO:0019866	CC	GO:0019866	organelle inner membrane	487	-0.409554	-1.44828	0.000138863	0.0297646	0.0279356	3286	tags=35%, list=22%, signal=28%	ENSG00000108826/ENSG00000116459/ENSG00000163319/ENSG00000182154/ENSG00000266472/ENSG00000172172/ENSG00000006530/ENSG00000090266/ENSG00000171421/ENSG00000137404/ENSG00000105197/ENSG00000125454/ENSG00000135940/ENSG00000173852/ENSG00000112651/ENSG00000100116/ENSG00000110955/ENSG00000137547/ENSG00000113845/ENSG00000099624/ENSG00000167065/ENSG00000130304/ENSG00000134056/ENSG00000072778/ENSG00000109390…
GO:0006882	BP	GO:0006882	intracellular zinc ion homeostasis	23	-0.857248	-1.95652	0.000147401	0.0310849	0.0291748	453	tags=26%, list=3%, signal=25%	ENSG00000159363/ENSG00000138821/ENSG00000187193/ENSG00000163220/ENSG00000143546/ENSG00000125148
GO:0010628	BP	GO:0010628	positive regulation of gene expression	759	0.70397	1.59215	0.000151531	0.0314486	0.0295162	1128	tags=13%, list=8%, signal=13%	ENSG00000162772/ENSG00000087074/ENSG00000136244/ENSG00000145777/ENSG00000125347/ENSG00000263528/ENSG00000057657/ENSG00000151014/ENSG00000102908/ENSG00000122641/ENSG00000136826/ENSG00000175197/ENSG00000075651/ENSG00000135842/ENSG00000187098/ENSG00000141448/ENSG00000078081/ENSG00000158246/ENSG00000168685/ENSG00000125730/ENSG00000172201/ENSG00000196352/ENSG00000173706/ENSG00000178607/ENSG00000155906…
GO:0140487	MF	GO:0140487	metal ion sequestering activity	4	-0.988606	-1.6164	0.000162536	0.0326947	0.0306857	3	tags=50%, list=0%, signal=50%	ENSG00000147804/ENSG00000143556
GO:0005743	CC	GO:0005743	mitochondrial inner membrane	444	-0.42037	-1.5052	0.000161487	0.0326947	0.0306857	3286	tags=35%, list=22%, signal=28%	ENSG00000108826/ENSG00000116459/ENSG00000163319/ENSG00000182154/ENSG00000266472/ENSG00000172172/ENSG00000006530/ENSG00000090266/ENSG00000171421/ENSG00000105197/ENSG00000125454/ENSG00000135940/ENSG00000112651/ENSG00000100116/ENSG00000110955/ENSG00000137547/ENSG00000113845/ENSG00000099624/ENSG00000167065/ENSG00000130304/ENSG00000134056/ENSG00000072778/ENSG00000109390/ENSG00000183048/ENSG00000176410…
GO:0050801	BP	GO:0050801	monoatomic ion homeostasis	369	-0.437287	-1.52291	0.000193962	0.0384251	0.036064	1937	tags=21%, list=13%, signal=19%	ENSG00000143162/ENSG00000127419/ENSG00000198668/ENSG00000050438/ENSG00000128052/ENSG00000091513/ENSG00000074621/ENSG00000185896/ENSG00000165915/ENSG00000114573/ENSG00000183826/ENSG00000085872/ENSG00000182220/ENSG00000102882/ENSG00000159720/ENSG00000088832/ENSG00000071553/ENSG00000145740/ENSG00000106460/ENSG00000116016/ENSG00000005059/ENSG00000182512/ENSG00000070729/ENSG00000183172/ENSG00000180694…
GO:0033293	MF	GO:0033293	monocarboxylic acid binding	43	-0.753565	-1.90801	0.000214018	0.0417655	0.0391992	1931	tags=33%, list=13%, signal=28%	ENSG00000127419/ENSG00000139194/ENSG00000197746/ENSG00000186350/ENSG00000114115/ENSG00000243678/ENSG00000084207/ENSG00000151632/ENSG00000004779/ENSG00000121207/ENSG00000173599/ENSG00000187134/ENSG00000163220/ENSG00000143546
GO:0051238	BP	GO:0051238	sequestering of metal ion	8	-0.949883	-1.7901	0.000225589	0.0433761	0.0407108	16	tags=38%, list=0%, signal=37%	ENSG00000132446/ENSG00000163220/ENSG00000143546
GO:0045540	BP	GO:0045540	regulation of cholesterol biosynthetic process	13	-0.915576	-1.90268	0.000234689	0.0438366	0.041143	722	tags=46%, list=5%, signal=44%	ENSG00000114650/ENSG00000100003/ENSG00000198911/ENSG00000111684/ENSG00000160179/ENSG00000072310
GO:0106118	BP	GO:0106118	regulation of sterol biosynthetic process	13	-0.915576	-1.90268	0.000234689	0.0438366	0.041143	722	tags=46%, list=5%, signal=44%	ENSG00000114650/ENSG00000100003/ENSG00000198911/ENSG00000111684/ENSG00000160179/ENSG00000072310
GO:0097050	BP	GO:0097050	type B pancreatic cell apoptotic process	7	0.989997	1.63788	0.00026234	0.0476402	0.0447128	9	tags=14%, list=0%, signal=14%	ENSG00000136244
GO:2000674	BP	GO:2000674	regulation of type B pancreatic cell apoptotic process	7	0.989997	1.63788	0.00026234	0.0476402	0.0447128	9	tags=14%, list=0%, signal=14%	ENSG00000136244
GO:0008324	MF	GO:0008324	monoatomic cation transmembrane transporter activity	333	-0.442393	-1.50816	0.000267575	0.0479252	0.0449803	2227	tags=25%, list=15%, signal=22%	ENSG00000141424/ENSG00000164707/ENSG00000140157/ENSG00000198515/ENSG00000158158/ENSG00000167535/ENSG00000096433/ENSG00000156113/ENSG00000069424/ENSG00000131143/ENSG00000170175/ENSG00000168389/ENSG00000127419/ENSG00000184709/ENSG00000050438/ENSG00000198569/ENSG00000074621/ENSG00000100170/ENSG00000165915/ENSG00000114573/ENSG00000154723/ENSG00000010256/ENSG00000154518/ENSG00000241468/ENSG00000159720…
GO:0010819	BP	GO:0010819	regulation of T cell chemotaxis	8	-0.946742	-1.78418	0.000283068	0.0481725	0.0452125	3	tags=25%, list=0%, signal=25%	ENSG00000181284/ENSG00000143556
GO:0010820	BP	GO:0010820	positive regulation of T cell chemotaxis	8	-0.946742	-1.78418	0.000283068	0.0481725	0.0452125	3	tags=25%, list=0%, signal=25%	ENSG00000181284/ENSG00000143556
GO:0033700	BP	GO:0033700	phospholipid efflux	6	-0.969003	-1.73035	0.000278583	0.0481725	0.0452125	196	tags=67%, list=1%, signal=66%	ENSG00000167972/ENSG00000064687/ENSG00000160179/ENSG00000165029
GO:2000348	BP	GO:2000348	regulation of CD40 signaling pathway	4	0.999014	1.55361	0.000283693	0.0481725	0.0452125	6	tags=25%, list=0%, signal=25%	ENSG00000118503
GO:1905331	BP	GO:1905331	negative regulation of morphogenesis of an epithelium	4	-0.986302	-1.61263	0.00029229	0.0489961	0.0459854	89	tags=50%, list=1%, signal=50%	ENSG00000101144/ENSG00000184292

## Sheet: Supplemental Table 7
	ID	Description	setSize	enrichmentScore	NES	pvalue	p.adjust	qvalue	rank	leading_edge	core_enrichment
HALLMARK_TNFA_SIGNALING_VIA_NFKB	HALLMARK_TNFA_SIGNALING_VIA_NFKB	HALLMARK_TNFA_SIGNALING_VIA_NFKB	181	0.918435	2.27338	0.000169866	0.00160136	0.000694086	615	tags=35%, list=3%, signal=34%	ENSG00000104856/ENSG00000162772/ENSG00000049249/ENSG00000023445/ENSG00000087074/ENSG00000077150/ENSG00000124225/ENSG00000136826/ENSG00000155090/ENSG00000056558/ENSG00000146232/ENSG00000205189/ENSG00000232810/ENSG00000132510/ENSG00000271503/ENSG00000099860/ENSG00000127528/ENSG00000116717/ENSG00000124762/ENSG00000107201/ENSG00000110848/ENSG00000118503/ENSG00000067082/ENSG00000059728/ENSG00000100906…
HALLMARK_MYC_TARGETS_V1	HALLMARK_MYC_TARGETS_V1	HALLMARK_MYC_TARGETS_V1	199	-0.73053	-2.13944	0.000251193	0.00160136	0.000694086	3065	tags=54%, list=17%, signal=45%	ENSG00000154174/ENSG00000145907/ENSG00000100823/ENSG00000163468/ENSG00000092199/ENSG00000196591/ENSG00000239672/ENSG00000106028/ENSG00000176890/ENSG00000170515/ENSG00000130332/ENSG00000108424/ENSG00000106628/ENSG00000135446/ENSG00000125870/ENSG00000215021/ENSG00000101811/ENSG00000004779/ENSG00000048828/ENSG00000088205/ENSG00000183207/ENSG00000125944/ENSG00000075914/ENSG00000198176/ENSG00000163918…
HALLMARK_G2M_CHECKPOINT	HALLMARK_G2M_CHECKPOINT	HALLMARK_G2M_CHECKPOINT	199	-0.723951	-2.12017	0.000251193	0.00160136	0.000694086	2882	tags=43%, list=16%, signal=36%	ENSG00000136811/ENSG00000134250/ENSG00000072501/ENSG00000108424/ENSG00000137497/ENSG00000189159/ENSG00000135446/ENSG00000109685/ENSG00000138182/ENSG00000137812/ENSG00000005156/ENSG00000115053/ENSG00000004897/ENSG00000198176/ENSG00000113810/ENSG00000154473/ENSG00000119318/ENSG00000112739/ENSG00000142731/ENSG00000168393/ENSG00000108106/ENSG00000112118/ENSG00000138376/ENSG00000123505/ENSG00000163808…
ATF4_target	ATF4_target	ATF4_target	65	0.916386	2.04731	0.000197785	0.00160136	0.000694086	404	tags=32%, list=2%, signal=32%	ENSG00000162772/ENSG00000087074/ENSG00000130766/ENSG00000128965/ENSG00000101255/ENSG00000100292/ENSG00000070669/ENSG00000116717/ENSG00000124762/ENSG00000175197/ENSG00000131711/ENSG00000140105/ENSG00000110619/ENSG00000172216/ENSG00000116761/ENSG00000170689/ENSG00000166394/ENSG00000107968/ENSG00000153879/ENSG00000176046/ENSG00000157514
HALLMARK_OXIDATIVE_PHOSPHORYLATION	HALLMARK_OXIDATIVE_PHOSPHORYLATION	HALLMARK_OXIDATIVE_PHOSPHORYLATION	197	-0.694029	-2.03231	0.000249813	0.00160136	0.000694086	3524	tags=54%, list=20%, signal=44%	ENSG00000120662/ENSG00000023228/ENSG00000105379/ENSG00000101365/ENSG00000138495/ENSG00000167792/ENSG00000108528/ENSG00000062485/ENSG00000169020/ENSG00000105197/ENSG00000156709/ENSG00000127884/ENSG00000116898/ENSG00000131143/ENSG00000167969/ENSG00000119689/ENSG00000154174/ENSG00000185883/ENSG00000100243/ENSG00000159199/ENSG00000010256/ENSG00000065518/ENSG00000184983/ENSG00000006695/ENSG00000158864…
HALLMARK_E2F_TARGETS	HALLMARK_E2F_TARGETS	HALLMARK_E2F_TARGETS	199	-0.67525	-1.97754	0.000251193	0.00160136	0.000694086	2989	tags=47%, list=17%, signal=39%	ENSG00000137309/ENSG00000239672/ENSG00000145220/ENSG00000170515/ENSG00000108848/ENSG00000111581/ENSG00000072501/ENSG00000111247/ENSG00000035928/ENSG00000189159/ENSG00000106628/ENSG00000135446/ENSG00000156136/ENSG00000205339/ENSG00000152253/ENSG00000143401/ENSG00000147224/ENSG00000125835/ENSG00000113810/ENSG00000196230/ENSG00000165304/ENSG00000071539/ENSG00000142731/ENSG00000164985/ENSG00000095002…
HALLMARK_GLYCOLYSIS	HALLMARK_GLYCOLYSIS	HALLMARK_GLYCOLYSIS	179	-0.665014	-1.92614	0.000241429	0.00160136	0.000694086	2373	tags=39%, list=13%, signal=34%	ENSG00000117407/ENSG00000169919/ENSG00000113552/ENSG00000091140/ENSG00000114023/ENSG00000113739/ENSG00000165215/ENSG00000146648/ENSG00000113643/ENSG00000134333/ENSG00000117411/ENSG00000067225/ENSG00000004478/ENSG00000128989/ENSG00000057294/ENSG00000072682/ENSG00000153208/ENSG00000162512/ENSG00000115677/ENSG00000082212/ENSG00000164904/ENSG00000102144/ENSG00000033170/ENSG00000138604/ENSG00000179913…
HALLMARK_MITOTIC_SPINDLE	HALLMARK_MITOTIC_SPINDLE	HALLMARK_MITOTIC_SPINDLE	197	-0.640108	-1.87442	0.000249813	0.00160136	0.000694086	2108	tags=23%, list=12%, signal=21%	ENSG00000136068/ENSG00000158195/ENSG00000084731/ENSG00000156299/ENSG00000138095/ENSG00000114346/ENSG00000163808/ENSG00000133026/ENSG00000017797/ENSG00000112029/ENSG00000079616/ENSG00000115306/ENSG00000130402/ENSG00000137807/ENSG00000100242/ENSG00000138778/ENSG00000140451/ENSG00000184445/ENSG00000151849/ENSG00000108953/ENSG00000112742/ENSG00000070831/ENSG00000117724/ENSG00000090889/ENSG00000198901…
HALLMARK_REACTIVE_OXYGEN_SPECIES_PATHWAY	HALLMARK_REACTIVE_OXYGEN_SPECIES_PATHWAY	HALLMARK_REACTIVE_OXYGEN_SPECIES_PATHWAY	44	-0.784118	-1.86019	0.000389181	0.00220536	0.000955883	838	tags=34%, list=5%, signal=33%	ENSG00000117592/ENSG00000123131/ENSG00000167815/ENSG00000001084/ENSG00000198431/ENSG00000136810/ENSG00000104687/ENSG00000121691/ENSG00000008394/ENSG00000142168/ENSG00000211445/ENSG00000117450/ENSG00000087086/ENSG00000160211/ENSG00000181019
HALLMARK_FATTY_ACID_METABOLISM	HALLMARK_FATTY_ACID_METABOLISM	HALLMARK_FATTY_ACID_METABOLISM	134	-0.64385	-1.80235	0.000452591	0.00230821	0.00100046	2693	tags=42%, list=15%, signal=36%	ENSG00000126088/ENSG00000117054/ENSG00000180902/ENSG00000111897/ENSG00000120437/ENSG00000080819/ENSG00000091483/ENSG00000128245/ENSG00000156587/ENSG00000089248/ENSG00000104823/ENSG00000091140/ENSG00000170835/ENSG00000072042/ENSG00000131828/ENSG00000134333/ENSG00000102172/ENSG00000197747/ENSG00000110090/ENSG00000115255/ENSG00000006831/ENSG00000168291/ENSG00000198130/ENSG00000083123/ENSG00000172340…
HALLMARK_INFLAMMATORY_RESPONSE	HALLMARK_INFLAMMATORY_RESPONSE	HALLMARK_INFLAMMATORY_RESPONSE	141	0.808891	1.95585	0.000711617	0.00311203	0.00134887	596	tags=18%, list=3%, signal=18%	ENSG00000049249/ENSG00000167995/ENSG00000134070/ENSG00000271503/ENSG00000105246/ENSG00000169429/ENSG00000124762/ENSG00000110848/ENSG00000067082/ENSG00000059728/ENSG00000100906/ENSG00000109320/ENSG00000090339/ENSG00000128342/ENSG00000185507/ENSG00000115604/ENSG00000184371/ENSG00000124875/ENSG00000181634/ENSG00000078081/ENSG00000115009/ENSG00000176170/ENSG00000125347/ENSG00000078401/ENSG00000167207…
HALLMARK_ADIPOGENESIS	HALLMARK_ADIPOGENESIS	HALLMARK_ADIPOGENESIS	183	-0.592292	-1.71867	0.000732243	0.00311203	0.00134887	2482	tags=39%, list=14%, signal=34%	ENSG00000127540/ENSG00000160216/ENSG00000099977/ENSG00000111275/ENSG00000132305/ENSG00000104823/ENSG00000111684/ENSG00000156171/ENSG00000091140/ENSG00000150593/ENSG00000117118/ENSG00000139641/ENSG00000116171/ENSG00000132300/ENSG00000179091/ENSG00000175567/ENSG00000143198/ENSG00000136960/ENSG00000079739/ENSG00000184076/ENSG00000120915/ENSG00000172893/ENSG00000150991/ENSG00000115255/ENSG00000176340…
HALLMARK_PROTEIN_SECRETION	HALLMARK_PROTEIN_SECRETION	HALLMARK_PROTEIN_SECRETION	93	-0.634769	-1.69432	0.00170831	0.00670182	0.00290481	2618	tags=34%, list=15%, signal=30%	ENSG00000129083/ENSG00000143401/ENSG00000135404/ENSG00000086598/ENSG00000177879/ENSG00000146648/ENSG00000104388/ENSG00000054983/ENSG00000042753/ENSG00000116039/ENSG00000161203/ENSG00000049245/ENSG00000181704/ENSG00000143761/ENSG00000125991/ENSG00000119396/ENSG00000165240/ENSG00000139921/ENSG00000003056/ENSG00000087460/ENSG00000145730/ENSG00000137845/ENSG00000170348/ENSG00000163399/ENSG00000085365…
HALLMARK_PEROXISOME	HALLMARK_PEROXISOME	HALLMARK_PEROXISOME	90	-0.616293	-1.6351	0.00277126	0.0100953	0.00437568	2477	tags=32%, list=14%, signal=28%	ENSG00000117528/ENSG00000128245/ENSG00000140284/ENSG00000104823/ENSG00000170835/ENSG00000072042/ENSG00000116171/ENSG00000182054/ENSG00000164751/ENSG00000114770/ENSG00000095002/ENSG00000120915/ENSG00000088002/ENSG00000116906/ENSG00000101846/ENSG00000012660/ENSG00000157593/ENSG00000149485/ENSG00000042445/ENSG00000100300/ENSG00000169714/ENSG00000138413/ENSG00000070756/ENSG00000198721/ENSG00000121691…
HALLMARK_MYC_TARGETS_V2	HALLMARK_MYC_TARGETS_V2	HALLMARK_MYC_TARGETS_V2	58	-0.657057	-1.63045	0.0041866	0.0142344	0.00616973	3169	tags=28%, list=18%, signal=23%	ENSG00000136933/ENSG00000170515/ENSG00000135446/ENSG00000109084/ENSG00000088205/ENSG00000162851/ENSG00000142731/ENSG00000167085/ENSG00000104738/ENSG00000122565/ENSG00000076248/ENSG00000181163/ENSG00000140263/ENSG00000166851/ENSG00000115541/ENSG00000144381
HALLMARK_INTERFERON_GAMMA_RESPONSE	HALLMARK_INTERFERON_GAMMA_RESPONSE	HALLMARK_INTERFERON_GAMMA_RESPONSE	162	0.716026	1.75284	0.00554017	0.0176593	0.00765418	1804	tags=31%, list=10%, signal=29%	ENSG00000135114/ENSG00000265972/ENSG00000271503/ENSG00000124762/ENSG00000107201/ENSG00000110848/ENSG00000104432/ENSG00000140105/ENSG00000118503/ENSG00000100906/ENSG00000109320/ENSG00000090339/ENSG00000185507/ENSG00000130589/ENSG00000234127/ENSG00000157601/ENSG00000185338/ENSG00000125347/ENSG00000133639/ENSG00000213928/ENSG00000150347/ENSG00000172183/ENSG00000137275/ENSG00000128604/ENSG00000150457…
HALLMARK_KRAS_SIGNALING_UP	HALLMARK_KRAS_SIGNALING_UP	HALLMARK_KRAS_SIGNALING_UP	143	0.723948	1.75448	0.00655331	0.0185677	0.00804793	419	tags=10%, list=2%, signal=10%	ENSG00000023445/ENSG00000087074/ENSG00000136826/ENSG00000056558/ENSG00000118503/ENSG00000164400/ENSG00000125845/ENSG00000108960/ENSG00000124107/ENSG00000166670/ENSG00000128342/ENSG00000115009/ENSG00000048052/ENSG00000095015/ENSG00000125398
HALLMARK_P53_PATHWAY	HALLMARK_P53_PATHWAY	HALLMARK_P53_PATHWAY	189	0.692361	1.7213	0.00639193	0.0185677	0.00804793	744	tags=15%, list=4%, signal=15%	ENSG00000162772/ENSG00000087074/ENSG00000136826/ENSG00000101255/ENSG00000265972/ENSG00000100292/ENSG00000116717/ENSG00000124762/ENSG00000175197/ENSG00000059728/ENSG00000110925/ENSG00000125845/ENSG00000170836/ENSG00000111725/ENSG00000128342/ENSG00000128422/ENSG00000168564/ENSG00000176046/ENSG00000197892/ENSG00000176170/ENSG00000185338/ENSG00000185339/ENSG00000118689/ENSG00000080546/ENSG00000141510…
HALLMARK_TGF_BETA_SIGNALING	HALLMARK_TGF_BETA_SIGNALING	HALLMARK_TGF_BETA_SIGNALING	53	0.84124	1.83686	0.00912224	0.0239867	0.0103967	360	tags=13%, list=2%, signal=13%	ENSG00000087074/ENSG00000124225/ENSG00000155090/ENSG00000136603/ENSG00000125845/ENSG00000054267/ENSG00000171223
HALLMARK_HYPOXIA	HALLMARK_HYPOXIA	HALLMARK_HYPOXIA	174	0.686187	1.69238	0.00940653	0.0239867	0.0103967	677	tags=14%, list=4%, signal=13%	ENSG00000162772/ENSG00000087074/ENSG00000100292/ENSG00000124762/ENSG00000175197/ENSG00000116285/ENSG00000151014/ENSG00000118263/ENSG00000118503/ENSG00000067082/ENSG00000185950/ENSG00000120129/ENSG00000165030/ENSG00000185022/ENSG00000100311/ENSG00000119938/ENSG00000170689/ENSG00000112715/ENSG00000095015/ENSG00000118689/ENSG00000134954/ENSG00000134107/ENSG00000133639/ENSG00000130635
HALLMARK_APOPTOSIS	HALLMARK_APOPTOSIS	HALLMARK_APOPTOSIS	144	0.698496	1.69396	0.0139873	0.033969	0.0147234	244	tags=11%, list=1%, signal=11%	ENSG00000162772/ENSG00000023445/ENSG00000265972/ENSG00000083799/ENSG00000100292/ENSG00000232810/ENSG00000099860/ENSG00000116717/ENSG00000124762/ENSG00000110848/ENSG00000141682/ENSG00000175197/ENSG00000068971/ENSG00000189060/ENSG00000125845/ENSG00000116761

## Sheet: Supplemental Table 8
	ID	Description	setSize	enrichmentScore	NES	pvalue	p.adjust	qvalue	rank	leading_edge	core_enrichment
HALLMARK_TNFA_SIGNALING_VIA_NFKB	HALLMARK_TNFA_SIGNALING_VIA_NFKB	HALLMARK_TNFA_SIGNALING_VIA_NFKB	164	0.894805	1.98048	0.000114012	0.00581462	0.00348037	803	tags=34%, list=5%, signal=33%	ENSG00000162772/ENSG00000087074/ENSG00000118503/ENSG00000116717/ENSG00000136244/ENSG00000104856/ENSG00000125347/ENSG00000077150/ENSG00000185022/ENSG00000023445/ENSG00000102908/ENSG00000155090/ENSG00000122641/ENSG00000136826/ENSG00000179094/ENSG00000120129/ENSG00000173391/ENSG00000134470/ENSG00000185215/ENSG00000168685/ENSG00000099860/ENSG00000109320/ENSG00000090339/ENSG00000110092/ENSG00000113070…
ATF4_target	ATF4_target	ATF4_target	61	0.936359	1.9343	0.000815107	0.0104998	0.00628473	444	tags=34%, list=3%, signal=34%	ENSG00000162772/ENSG00000087074/ENSG00000116717/ENSG00000101255/ENSG00000168003/ENSG00000116761/ENSG00000168209/ENSG00000130513/ENSG00000130766/ENSG00000175197/ENSG00000143333/ENSG00000128965/ENSG00000131711/ENSG00000151012/ENSG00000153879/ENSG00000196305/ENSG00000100292/ENSG00000110619/ENSG00000120833/ENSG00000140105/ENSG00000136010
HALLMARK_KRAS_SIGNALING_UP	HALLMARK_KRAS_SIGNALING_UP	HALLMARK_KRAS_SIGNALING_UP	120	0.879892	1.91755	0.000835322	0.0104998	0.00628473	241	tags=13%, list=2%, signal=13%	ENSG00000087074/ENSG00000118503/ENSG00000130222/ENSG00000020181/ENSG00000057657/ENSG00000023445/ENSG00000122641/ENSG00000136826/ENSG00000117569/ENSG00000143333/ENSG00000168685/ENSG00000244405/ENSG00000134954/ENSG00000048052/ENSG00000136158/ENSG00000113070
HALLMARK_HYPOXIA	HALLMARK_HYPOXIA	HALLMARK_HYPOXIA	159	0.842355	1.86128	0.00102939	0.0104998	0.00628473	442	tags=18%, list=3%, signal=18%	ENSG00000162772/ENSG00000087074/ENSG00000118503/ENSG00000136244/ENSG00000185022/ENSG00000168209/ENSG00000151014/ENSG00000175197/ENSG00000116285/ENSG00000049759/ENSG00000120129/ENSG00000182197/ENSG00000113580/ENSG00000134954/ENSG00000113739/ENSG00000164442/ENSG00000152256/ENSG00000165030/ENSG00000104419/ENSG00000146648/ENSG00000115548/ENSG00000146278/ENSG00000100292/ENSG00000044574/ENSG00000188994…
HALLMARK_OXIDATIVE_PHOSPHORYLATION	HALLMARK_OXIDATIVE_PHOSPHORYLATION	HALLMARK_OXIDATIVE_PHOSPHORYLATION	196	-0.520104	-1.67497	0.000994036	0.0104998	0.00628473	3166	tags=43%, list=21%, signal=35%	ENSG00000105197/ENSG00000135940/ENSG00000091140/ENSG00000128524/ENSG00000067829/ENSG00000110955/ENSG00000137547/ENSG00000138495/ENSG00000099624/ENSG00000136888/ENSG00000072778/ENSG00000109390/ENSG00000091483/ENSG00000164039/ENSG00000150779/ENSG00000075239/ENSG00000204370/ENSG00000113732/ENSG00000151366/ENSG00000156709/ENSG00000146701/ENSG00000171503/ENSG00000126267/ENSG00000178127/ENSG00000169021…
HALLMARK_PEROXISOME	HALLMARK_PEROXISOME	HALLMARK_PEROXISOME	87	-0.575348	-1.67142	0.00283019	0.0240566	0.0143992	1824	tags=30%, list=12%, signal=26%	ENSG00000117450/ENSG00000012061/ENSG00000012660/ENSG00000095321/ENSG00000114770/ENSG00000159692/ENSG00000067064/ENSG00000075223/ENSG00000176387/ENSG00000117528/ENSG00000151729/ENSG00000160752/ENSG00000165092/ENSG00000133835/ENSG00000214253/ENSG00000126432/ENSG00000116133/ENSG00000140009/ENSG00000182054/ENSG00000150967/ENSG00000042445/ENSG00000149485/ENSG00000013364/ENSG00000101986/ENSG00000101846…
HALLMARK_APOPTOSIS	HALLMARK_APOPTOSIS	HALLMARK_APOPTOSIS	132	0.844664	1.85011	0.00448219	0.0326559	0.0195464	389	tags=12%, list=3%, signal=12%	ENSG00000162772/ENSG00000116717/ENSG00000136244/ENSG00000125347/ENSG00000023445/ENSG00000116761/ENSG00000175197/ENSG00000099860/ENSG00000110092/ENSG00000064012/ENSG00000083799/ENSG00000111859/ENSG00000100292/ENSG00000189060/ENSG00000142867/ENSG00000027697
HALLMARK_UNFOLDED_PROTEIN_RESPONSE	HALLMARK_UNFOLDED_PROTEIN_RESPONSE	HALLMARK_UNFOLDED_PROTEIN_RESPONSE	111	0.84603	1.83938	0.0067592	0.0383022	0.022926	356	tags=10%, list=2%, signal=10%	ENSG00000162772/ENSG00000168209/ENSG00000080802/ENSG00000128965/ENSG00000178607/ENSG00000153879/ENSG00000113739/ENSG00000196305/ENSG00000128590/ENSG00000044574/ENSG00000184575
HALLMARK_P53_PATHWAY	HALLMARK_P53_PATHWAY	HALLMARK_P53_PATHWAY	184	0.802451	1.78208	0.00628648	0.0383022	0.022926	403	tags=10%, list=3%, signal=10%	ENSG00000162772/ENSG00000087074/ENSG00000116717/ENSG00000249859/ENSG00000101255/ENSG00000168003/ENSG00000168209/ENSG00000136826/ENSG00000100439/ENSG00000175197/ENSG00000143333/ENSG00000151012/ENSG00000113070/ENSG00000104419/ENSG00000170836/ENSG00000100292/ENSG00000183044/ENSG00000181218
HALLMARK_EPITHELIAL_MESENCHYMAL_TRANSITION	HALLMARK_EPITHELIAL_MESENCHYMAL_TRANSITION	HALLMARK_EPITHELIAL_MESENCHYMAL_TRANSITION	127	0.817836	1.78888	0.00983063	0.0475615	0.0284682	906	tags=18%, list=6%, signal=17%	ENSG00000118503/ENSG00000116717/ENSG00000136244/ENSG00000122641/ENSG00000172164/ENSG00000112186/ENSG00000140416/ENSG00000073008/ENSG00000099860/ENSG00000135919/ENSG00000111799/ENSG00000106366/ENSG00000135318/ENSG00000169429/ENSG00000106484/ENSG00000041982/ENSG00000078098/ENSG00000011422/ENSG00000153071/ENSG00000138448/ENSG00000149591/ENSG00000073712/ENSG00000176697
HALLMARK_TGF_BETA_SIGNALING	HALLMARK_TGF_BETA_SIGNALING	HALLMARK_TGF_BETA_SIGNALING	52	0.866665	1.76683	0.0113366	0.0475615	0.0284682	679	tags=13%, list=5%, signal=13%	ENSG00000087074/ENSG00000155090/ENSG00000177426/ENSG00000159128/ENSG00000106366/ENSG00000166949/ENSG00000104067
HALLMARK_UV_RESPONSE_UP	HALLMARK_UV_RESPONSE_UP	HALLMARK_UV_RESPONSE_UP	135	0.796993	1.74597	0.0127964	0.0475615	0.0284682	599	tags=7%, list=4%, signal=7%	ENSG00000162772/ENSG00000136244/ENSG00000125347/ENSG00000153879/ENSG00000090339/ENSG00000100292/ENSG00000100906/ENSG00000134352/ENSG00000161011/ENSG00000023330
HALLMARK_KRAS_SIGNALING_DN	HALLMARK_KRAS_SIGNALING_DN	HALLMARK_KRAS_SIGNALING_DN	90	-0.528426	-1.54462	0.0130561	0.0475615	0.0284682	888	tags=23%, list=6%, signal=22%	ENSG00000139182/ENSG00000177000/ENSG00000143126/ENSG00000178372/ENSG00000100033/ENSG00000198246/ENSG00000125648/ENSG00000268104/ENSG00000188338/ENSG00000068078/ENSG00000159388/ENSG00000173898/ENSG00000127415/ENSG00000124466/ENSG00000250722/ENSG00000106003/ENSG00000130005/ENSG00000156284/ENSG00000129455/ENSG00000116039/ENSG00000171346
HALLMARK_ESTROGEN_RESPONSE_LATE	HALLMARK_ESTROGEN_RESPONSE_LATE	HALLMARK_ESTROGEN_RESPONSE_LATE	171	-0.447899	-1.41931	0.0120482	0.0475615	0.0284682	748	tags=13%, list=5%, signal=13%	ENSG00000143126/ENSG00000103942/ENSG00000141232/ENSG00000150593/ENSG00000079459/ENSG00000068078/ENSG00000182054/ENSG00000118513/ENSG00000005249/ENSG00000112378/ENSG00000176485/ENSG00000167972/ENSG00000164050/ENSG00000171345/ENSG00000164626/ENSG00000172893/ENSG00000149418/ENSG00000111319/ENSG00000137699/ENSG00000010278/ENSG00000164919/ENSG00000163220/ENSG00000197249
